# Supplementary material for: Palladium-catalyzed regiodivergent hydroaminocarbonylation of alkenes to primary amides with ammonium chloride
Source: Royal Society of Chemistry journal article supplement (doi:10.1039/c7sc04054g), 2017-10-24

Supporting Information for:

## **Palladium-Catalyzed Regiodivergent Hydroaminocarbonylation of Alkenes to Primary Amides with Ammonium Chloride**

Bao Gao,<sup>a</sup> Guoying Zhang,<sup>a</sup> Xibing Zhou,<sup>a</sup> and Hanmin Huang<sup>\*, a, b</sup>

<sup>a</sup>Department of Chemistry, and Hefei National Laboratory for Physical Sciences at the Microscale University of Science and Technology of China, Hefei, 230026, P. R. China

<sup>b</sup>State Key Laboratory for Oxo Synthesis and Selective Oxidation, Lanzhou Institute of Chemical Physics, Chinese Academy of Sciences, Lanzhou 730000, P. R. China

\*E-mail: [hanmin@ustc.edu.cn](mailto:hanmin@ustc.edu.cn)

### **CONTENTS**

- 1 General experimental details and materials**
- 2 Optimization of the reaction conditions**
- 3 General procedure for the hydroaminocarbonylation reaction**
- 4 Experimental characterization data for products**
- 5 Application of primary amides**
- 6 Mechanistic studies**
- 7 Copies of <sup>1</sup>H NMR and <sup>13</sup>C NMR of the amides**

## 1. General experiment details and materials

**Experimental:** All non-aqueous reactions and manipulations were using standard Schlenk techniques. All solvents before use were dried and degassed by standard methods and stored under nitrogen atmosphere. All reactions were monitored by TLC with silica gel-coated plates. NMR spectra were recorded on BRUKER Avance III 400 MHz spectrometers. Chemical shifts were reported in parts per million (ppm) down field from TMS with the solvent resonance as the internal standard. Coupling constants (J) were reported in Hz and referred to apparent peak multiplications. High resolution mass spectra (HRMS) were recorded on Bruker MicroTOF-QII mass (ESI). GC analysis were performed on Agilent 7890B with Hp-5 column. GS-MS analysis were performed with Agilent 7890B/5975B GC-MS system. Styrenes (**1a-1t**, **4a**, **4m-4p**) purchased from Alfa Aesar or Sigma Aldrich. Alkenes (**4b-4l**)<sup>1</sup>, estrone derivative alkene<sup>2</sup> and aliphatic alkenes containing heteroatom<sup>3</sup> were known compounds and synthesized according to the reported methods.

## 2. Optimization of the reaction conditions

### 2.1 Effects of ammonium salts on the hydroaminocarbonylation of alkenes

In a glove box, a mixture of  $\text{NH}_4\text{X}$  (2.0 mmol),  $\text{Pd}(t\text{-Bu}_3\text{P})_2$  (25.5 mg, 0.05 mmol, 5 mol%) and NMP (5.0 mL) was added into a dry glass vessel. The resulting mixture was stirred for 10 minutes at room temperature and then styrene (114  $\mu\text{L}$ , 1.0 mmol) was added into the reaction mixture. The glass vessel was put into an autoclave and then taken out from glove box. The autoclave was purged and charged with CO (30 atm). The reaction mixture was stirred at 120  $^\circ\text{C}$  for 24 hours. After the reaction finished, the autoclave was cooled to room temperature and the pressure was carefully released in the fume hood. The regioselectivity and yield were measured by GC and GC-MS using *n*-cetane as the internal standard, respectively.

**Table S1. Effects of ammonium salts on the hydroaminocarbonylation <sup>a</sup>**

Reaction scheme:  $\text{Ph-CH=CH}_2$  (**1a**) +  $\text{CO}$  +  $\text{NH}_4\text{X}$   $\xrightarrow{\text{Pd}(t\text{-Bu}_3\text{P})_2}$   $\text{Ph-CH}_2\text{-CH}_2\text{-C(=O)-NH}_2$  (**2a**) +  $\text{Ph-CH}_2\text{-CH}_2\text{-CH}_2\text{-C(=O)-NH}_2$  (**3a**)

| entry           | $\text{NH}_4\text{X}$                 | <b>2a+3a (%)</b> | <b>2a:3a</b> |
|-----------------|---------------------------------------|------------------|--------------|
| 1               | $\text{NH}_4\text{Cl}$                | 95               | 96:4         |
| 2               | $\text{NH}_4\text{F}$                 | 0                | -            |
| 3               | $\text{NH}_4\text{Br}$                | <5               | -            |
| 4               | $\text{NH}_4\text{I}$                 | 6                | -            |
| 5               | $\text{NH}_4\text{OAc}$               | 0                | -            |
| 6               | $\text{NH}_4\text{Bz}$                | 0                | -            |
| 7               | $\text{NH}_4\text{PF}_6$              | 0                | -            |
| 8               | $\text{NH}_4\text{HF}_2$              | 0                | -            |
| 9               | $\text{NH}_4\text{HCO}_3$             | 0                | -            |
| 10 <sup>b</sup> | $(\text{NH}_4)_2\text{CO}_3$          | 0                | -            |
| 11 <sup>b</sup> | $(\text{NH}_4)_2\text{S}_2\text{O}_8$ | 0                | -            |
| 12 <sup>b</sup> | $(\text{NH}_4)_2\text{SO}_4$          | 0                | -            |
| 13              | -                                     | 0                | -            |
| 14 <sup>c</sup> | $\text{NH}_4\text{Cl}$                | <5               | -            |

<sup>a</sup> Reaction conditions: **1a** (1.0 mmol), NH<sub>4</sub>X (2.0 mmol), Pd(*t*-Bu<sub>3</sub>P)<sub>2</sub> (0.05 mmol), NMP (5 mL), CO (30 atm), 120 °C, 24 h. <sup>b</sup> NH<sub>4</sub>X (1.0 mmol). <sup>c</sup> CO (1.0 atm). Yields and ratios of **2a** and **3a** were determined by GC and GC-MS analysis using *n*-cetane as the internal standard.

## 2.2 Effects of ligands on the hydroaminocarbonylation of alkenes

In a glove box, a mixture of NH<sub>4</sub>Cl (106.8 mg, 2.0 mmol), [Pd] and NMP was added into a dry glass vessel. The resulting mixture was stirred for 10 minutes at room temperature and then styrene (114 uL, 1.0 mmol) was added into the reaction mixture. The glass vessel was put into an autoclave and then taken out from glove box. The autoclave was purged and charged with CO. The reaction mixture was stirred at 120 °C for 24 hours. After the reaction finished, the autoclave was cooled to room temperature and the pressure was carefully released in the fume hood. The regioselectivity and yield were measured by GC and GC-MS using *n*-cetane as the internal standard, respectively.

**Table S2.** Effects of ligands on the hydroaminocarbonylation of alkenes <sup>a</sup>

| Entry           | [Pd]                                            | Ligand                 | CO (atm)  | Yield <b>2a+3a</b> (%) | <b>2a:3a</b> |
|-----------------|-------------------------------------------------|------------------------|-----------|------------------------|--------------|
| <b>1</b>        | <b>Pd(<i>t</i>-Bu<sub>3</sub>P)<sub>2</sub></b> | -                      | <b>30</b> | <b>95</b>              | <b>96:4</b>  |
| 2               | Pd( <i>t</i> -Bu <sub>3</sub> P) <sub>2</sub>   | -                      | 20        | 96                     | 88:12        |
| 3               | Pd( <i>t</i> -Bu <sub>3</sub> P) <sub>2</sub>   | -                      | 10        | 82                     | 85:15        |
| 4 <sup>b</sup>  | Pd( <i>t</i> -Bu <sub>3</sub> P) <sub>2</sub>   | -                      | 30        | 84                     | 96:4         |
| 5               | Pd(PPh <sub>3</sub> ) <sub>4</sub>              | -                      | 30        | 90                     | 81:19        |
| 6 <sup>c</sup>  | PdI <sub>2</sub>                                | Xantphos               | 30        | 86                     | 17:83        |
| 7 <sup>c</sup>  | PdI <sub>2</sub>                                | DPEphos                | 30        | 34                     | 22:78        |
| 8 <sup>c</sup>  | PdI <sub>2</sub>                                | DPPF                   | 30        | 25                     | 36:64        |
| 9 <sup>c</sup>  | PdI <sub>2</sub>                                | DPPH                   | 30        | 27                     | 51:49        |
| 10 <sup>c</sup> | PdI <sub>2</sub>                                | DPPPen                 | 30        | 23                     | 21:79        |
| 11 <sup>c</sup> | PdI <sub>2</sub>                                | DPPB                   | 30        | <5                     | -            |
| 12 <sup>c</sup> | PdI <sub>2</sub>                                | DPPP                   | 30        | <5                     | -            |
| 13 <sup>c</sup> | PdI <sub>2</sub>                                | DPPE                   | 30        | <5                     | -            |
| 14 <sup>c</sup> | PdI <sub>2</sub>                                | DPPM                   | 30        | <5                     | -            |
| 15 <sup>c</sup> | PdI <sub>2</sub>                                | PPh <sub>3</sub>       | 30        | 56                     | 30:70        |
| 16 <sup>c</sup> | PdI <sub>2</sub>                                | P(2-MePh) <sub>3</sub> | 30        | 13                     | 68:32        |



|                 |                  |                        |    |    |       |
|-----------------|------------------|------------------------|----|----|-------|
| 17 <sup>c</sup> | PdI <sub>2</sub> | P(4-MePh) <sub>3</sub> | 30 | 41 | 31:69 |
| 18 <sup>c</sup> | PdI <sub>2</sub> | PCy <sub>3</sub>       | 30 | 40 | 52:48 |
| 19 <sup>c</sup> | PdI <sub>2</sub> | Ruphos                 | 30 | 58 | 35:65 |
| 20 <sup>c</sup> | PdI <sub>2</sub> | Dave Phos              | 30 | 46 | 48:52 |
| 21 <sup>c</sup> | PdI <sub>2</sub> | Xphos                  | 30 | 47 | 42:58 |
| 22 <sup>c</sup> | -                | Xantphos               | 30 | 20 | 32:68 |

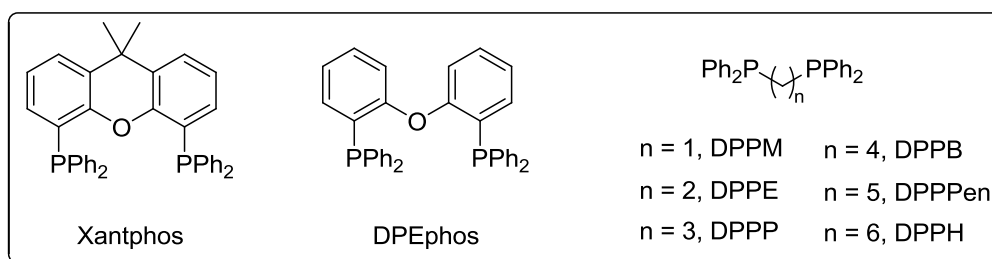

<sup>a</sup> Reaction conditions: **1a** (1.0 mmol), NH<sub>4</sub>Cl (2.0 mmol), Pd(*t*-Bu<sub>3</sub>P)<sub>2</sub> (0.05 mmol), NMP (5 mL), CO (30 atm), 120 °C, 24 h. <sup>b</sup> 15 h, isolated yield. <sup>c</sup> PdI<sub>2</sub> (0.02 mmol), bidentate phosphine ligand (0.025 mmol) or monodentate phosphine ligand (0.05 mmol), CO (30 atm), NMP (3.0 mL), 24 h. Yields and ratios of **2a** and **3a** were determined by GC and GC-MS analysis using *n*-cetane as the internal standard.

**Table S3. Screening of catalyst precursors for linear amide <sup>a</sup>**

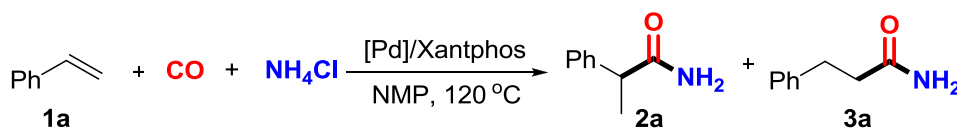

| Entry | [Pd]                                   | Ligand   | Yield <b>2a+3a</b> (%) | <b>2a:3a</b> |
|-------|----------------------------------------|----------|------------------------|--------------|
| 1     | PdI <sub>2</sub>                       | Xantphos | <b>86</b>              | <b>17:83</b> |
| 2     | PdCl <sub>2</sub>                      | Xantphos | 68                     | 25:75        |
| 3     | PdBr <sub>2</sub>                      | Xantphos | 86                     | 24:76        |
| 4     | Pd <sub>2</sub> (dba) <sub>3</sub>     | Xantphos | 61                     | 22:78        |
| 5     | Pd(OAc) <sub>2</sub>                   | Xantphos | 67                     | 27:73        |
| 6     | Pd(TFA) <sub>2</sub>                   | Xantphos | 68                     | 24:76        |
| 7     | Pd(COD)Cl <sub>2</sub>                 | Xantphos | 74                     | 25:75        |
| 8     | Pd(COD)Br <sub>2</sub>                 | Xantphos | 64                     | 29:71        |
| 9     | Pd(CH <sub>3</sub> CN) <sub>2</sub> Cl | Xantphos | 62                     | 24:76        |
| 10    | -                                      | Xantphos | 20                     | 32:68        |

<sup>a</sup> Reaction conditions: **1a** (1.0 mmol), NH<sub>4</sub>Cl (2.0 mmol), [Pd] (0.02 mmol), Xantphos (0.025 mmol), CO (30 atm), NMP (3.0 mL), 24 h. Yields and ratios of **2a** and **3a** were determined by GC and GC-MS analysis using *n*-cetane as the internal standard.

**Table S4. Screening of reaction time for linear amide <sup>a</sup>**

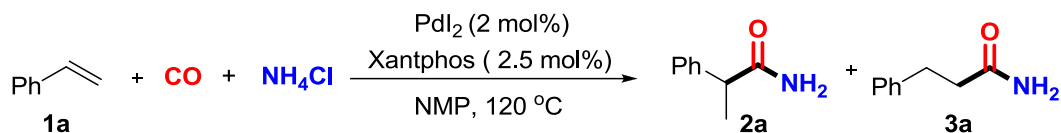

| Entry | t (h) | Yield <b>2a+3a</b> (%) | <b>2a:3a</b> |
|-------|-------|------------------------|--------------|
| 1     | 24    | 86                     | 17:83        |
| 2     | 12    | 87                     | 17:83        |
| 3     | 6     | 88                     | 18:82        |
| 4     | 4     | 90                     | 17:83        |
| 5     | 2     | 61                     | 16:84        |

<sup>a</sup> Reaction conditions: **1a** (1.0 mmol), NH<sub>4</sub>Cl (2.0 mmol), PdI<sub>2</sub> (0.02 mmol), Xantphos (0.025 mmol), CO (30 atm), NMP (3 mL), 120 °C. Yields and ratios of **2a** and **3a** were determined by GC and GC-MS analysis using *n*-cetane as the internal standard.

**Table S5. Screening of the pressure of CO for linear amide <sup>a</sup>**

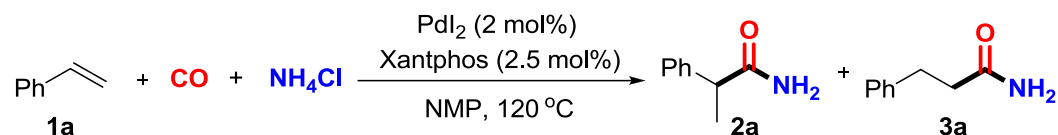

| Entry | CO (atm) | Yield <b>2a+3a</b> (%) | <b>2a:3a</b> |
|-------|----------|------------------------|--------------|
| 1     | 30       | 90                     | 17:83        |
| 2     | 20       | 65                     | 17:83        |
| 3     | 10       | 60                     | 17:83        |

<sup>a</sup> Reaction conditions: **1a** (1.0 mmol), NH<sub>4</sub>Cl (2.0 mmol), PdI<sub>2</sub> (0.02 mmol), Xantphos (0.025 mmol), CO, NMP (3 mL), 4 h. Yields and ratios of **2a** and **3a** were determined by GC and GC-MS analysis using *n*-cetane as the internal standard.

**Table S6. Effect of concentration for synthesis of branched amide <sup>a</sup>**

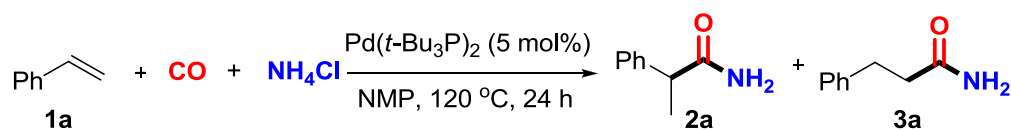

| Entry | NMP (mL) | Yield <b>2a+3a</b> (%) | <b>2a:3a</b> |
|-------|----------|------------------------|--------------|
| 1     | 1 mL     | 68                     | 59:41        |
| 2     | 2 mL     | 76                     | 74:26        |
| 3     | 3 mL     | 80                     | 85:15        |
| 4     | 4 mL     | 91                     | 91:9         |
| 5     | 5 mL     | 95                     | 96:4         |

<sup>a</sup> Reaction condition: **1a** (1.0 mmol), NH<sub>4</sub>Cl (2.0 mmol), Pd(*t*-Bu<sub>3</sub>P)<sub>2</sub> (0.05 mmol), NMP (5 mL), CO (30 atm), 120 °C, 24 h. Yields and ratios of **2a** and **3a** were determined by GC and GC-MS analysis using *n*-cetane as the internal standard.

### 3. General procedure for the hydroaminocarbonylation reaction

#### 3.1 Reaction condition A:

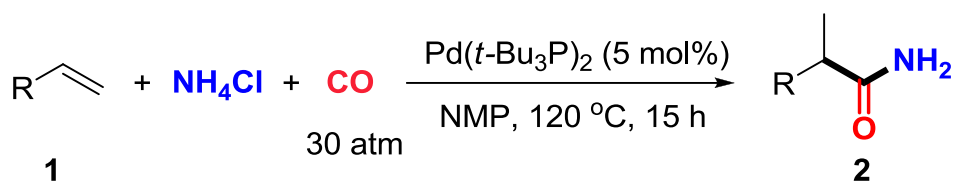

In a glove box, a mixture of  $\text{NH}_4\text{Cl}$  (106.8 mg, 2.0 mmol),  $\text{Pd}(t\text{-Bu}_3\text{P})_2$  (25.5 mg, 0.05 mmol) and NMP (5.0 mL) was added into a dry glass vessel. The resulting mixture was stirred for 10 minutes at room temperature and then alkenes **1** (1.0 mmol) was added into the reaction mixture. The glass vessel was put into an autoclave and then taken out from the glove box. The autoclave was purged and charged with CO (30 atm). The reaction mixture was stirred at 120 °C for 15 hours. After the reaction finished, the autoclave was cooled to room temperature and the pressure was carefully released in the fume hood. The regioselectivity was measured by GC and GC-MS, respectively. Then the corresponding reaction mixture was purified by flash column chromatography on silica gel and eluted with petroleum ether/ethyl acetate (100/1 - 1/1) to give the desired products **2**.

#### 3.2 Reaction condition B:

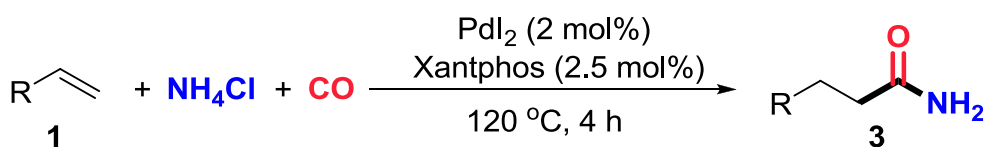

In a glove box, a mixture of  $\text{NH}_4\text{Cl}$  (106.8 mg, 2.0 mmol),  $\text{PdI}_2$  (7.2 mg, 0.02 mmol), Xantphos (14.5 mg, 0.025 mmol) and NMP (3.0 mL) was added into a dry glass vessel. The resulting mixture was stirred for 10 minutes at room temperature and then alkenes (1.0 mmol) was added into the reaction mixture. The glass vessel was put into an autoclave and then taken out from the glove box. The autoclave was purged and charged with CO (30 atm). The reaction mixture was stirred at 120 °C for 4 hours. After the reaction finished, the autoclave was cooled to room temperature and the pressure was carefully released in the fume hood. The regioselectivity was measured

by GC and GC-MS, respectively. Then the corresponding reaction mixture was purified by flash column chromatography on silica gel and eluted with petroleum ether/ethyl acetate (100/1 - 1/1) to give the desired products **3**.

### 3.3 Reaction condition C:

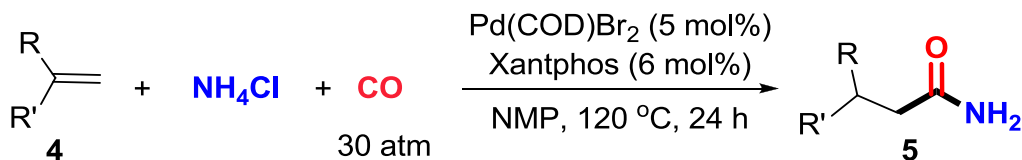

In a glove box, a mixture of  $\text{NH}_4\text{Cl}$  (106.8 mg, 2.0 mmol),  $\text{Pd(COD)Br}_2$  (18.7 mg, 0.05 mmol), Xantphos (34.7 mg, 0.06 mmol) and NMP (5.0 mL) was added into a dry glass vessel. The resulting mixture was stirred for 10 minutes at room temperature and then alkenes **4** (1.0 mmol) was added into the reaction mixture. The glass vessel was put into an autoclave and then taken out from the glove box. The autoclave was purged and charged with CO (30 atm). The reaction mixture was stirred at 120 °C for 24 or 48 hours. After the reaction finished, the autoclave was cooled to room temperature and the pressure was carefully released in the fume hood. The regioselectivity was measured by GC and GC-MS, respectively. Then the corresponding reaction mixture was purified by flash column chromatography on silica gel and eluted with petroleum ether/ethyl acetate (100/1 - 1/1) to give the desired products **5**.

#### 4. Experimental characterization data for products

**2-phenylpropanamide (2a):** The title compound was prepared according to the

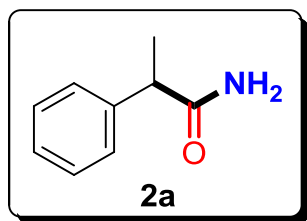

general procedure and purified by column chromatography to give a white solid, 124.8 mg, 84% yield.  $^1\text{H}$  NMR (400 MHz,  $\text{CDCl}_3$ )  $\delta$  1.39 (d,  $J = 7.2$  Hz, 3H), 3.46 (q,  $J = 7.2$  Hz, 1H), 5.53 (br, 1H), 6.27 (br, 1H), 7.15-7.25 (m, 5H);  $^{13}\text{C}$  NMR (100 MHz,  $\text{CDCl}_3$ )  $\delta$  18.4, 46.5, 127.3, 127.6, 128.9,

141.3, 177.3; **HRMS** (ESI) calcd. for  $\text{C}_9\text{H}_{11}\text{NONa}$   $[\text{M}+\text{Na}]$ : 172.0733, found: 172.0733.

**2-*p*-tolylpropanamide (2b):** The title compound was prepared according to the

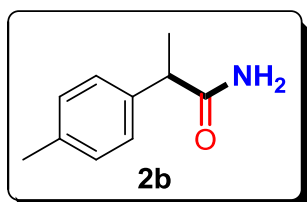

general procedure and purified by column chromatography to give a white solid, 130.7 mg, 80% yield.  $^1\text{H}$  NMR (400 MHz,  $\text{CDCl}_3$ )  $\delta$  1.48 (d,  $J = 7.2$  Hz, 3H), 2.33 (s, 3H), 3.52 (q,  $J = 7.2$  Hz, 1H), 5.45 (br, 1H), 6.05 (br, 1H), 7.13 (d,  $J =$

8.0 Hz, 2H), 7.18 (d,  $J = 8.0$  Hz, 2H);  $^{13}\text{C}$  NMR (100 MHz,  $\text{CDCl}_3$ )  $\delta$  18.3, 21.0, 46.2, 127.5, 129.6, 137.0, 138.3, 177.3; **HRMS** (ESI) calcd. for  $\text{C}_{10}\text{H}_{13}\text{NONa}$   $[\text{M}+\text{Na}]$ : 186.0889, found: 186.0889.

**2-*m*-tolylpropanamide (2c):** The title compound was prepared according to the

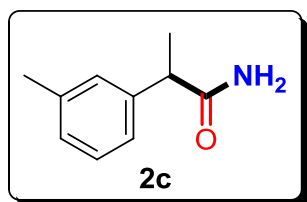

general procedure and purified by column chromatography to give a white solid, 125.6 mg, 77% yield.  $^1\text{H}$  NMR (400 MHz,  $\text{CDCl}_3$ )  $\delta$  1.49 (d,  $J = 7.2$  Hz, 3H), 2.34 (s, 3H), 3.53 (q,  $J = 7.2$  Hz, 1H), 5.44 (br, 1H), 6.02 (br, 1H), 7.07-7.11 (m, 3H), 7.21-7.26 (m, 1H);  $^{13}\text{C}$  NMR (100 MHz,  $\text{CDCl}_3$ )  $\delta$

18.3, 21.4, 46.5, 124.6, 128.1, 128.3, 128.8, 138.7, 141.2, 177.1; **HRMS** (ESI) calcd. for  $\text{C}_{10}\text{H}_{13}\text{NONa}$   $[\text{M}+\text{Na}]$ : 186.0889, found: 186.0897.

**2-*o*-tolylpropanamide (2d):** The title compound was prepared according to the general procedure and purified by column chromatography to give a white solid, 126.9

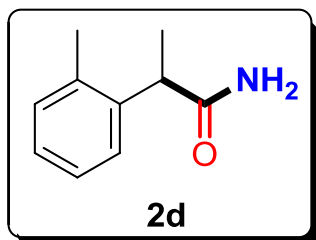

mg, 78% yield.  $^1\text{H}$  NMR (400 MHz,  $\text{CDCl}_3$ )  $\delta$  1.50 (d,  $J$  = 7.2 Hz, 3H), 2.34 (s, 3H), 3.76 (q,  $J$  = 7.2 Hz, 1H), 5.32 (br, 1H), 6.11 (br, 1H), 7.17-7.24 (m, 3H), 7.29-7.30 (m, 1H);  $^{13}\text{C}$  NMR (100 MHz,  $\text{CDCl}_3$ )  $\delta$  17.6, 19.6, 43.1, 126.8, 126.8, 127.3, 130.8, 136.3, 139.3, 177.4; HRMS (ESI)

calcd. for  $\text{C}_{10}\text{H}_{13}\text{NO}$  [M+Na]: 186.0889, found: 186.0894.

**2-(4-*tert*-butylphenyl)propanamide (2e):** The title compound was prepared according

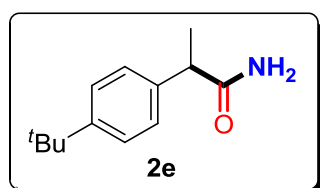

to the general procedure and purified by column chromatography to give a white solid, 160.8 mg, 78% yield.  $^1\text{H}$  NMR (400 MHz,  $\text{CDCl}_3$ )  $\delta$  1.31 (s, 9H), 1.51 (d,  $J$  = 7.2 Hz, 3H), 3.55 (q,  $J$  = 7.2 Hz, 1H), 5.37 (br, 1H),

5.72 (br, 1H), 7.22-7.26 (m, 2H), 7.36-7.38 (m, 2H);  $^{13}\text{C}$  NMR (100 MHz,  $\text{CDCl}_3$ )  $\delta$  18.2, 31.3, 34.5, 46.1, 125.9, 127.3, 138.1, 150.3, 177.0; HRMS (ESI) calcd. for  $\text{C}_{13}\text{H}_{20}\text{NO}$  [M+H]: 206.1539, found: 206.1546.

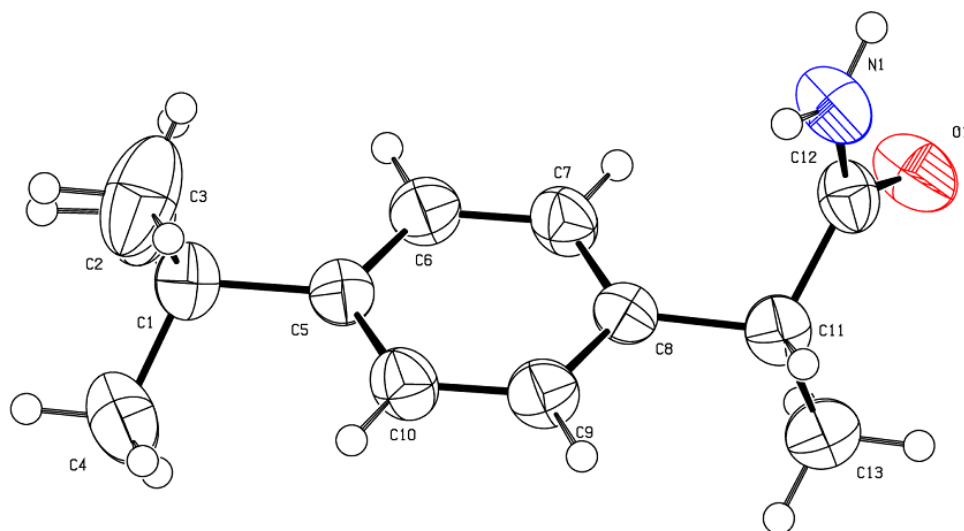

**Figure S1.** ORTEP drawing of product **2e**

**2-(4-methoxyphenyl)propanamide (2f):** The title compound was prepared according to the general procedure and purified by column chromatography to give a white solid,

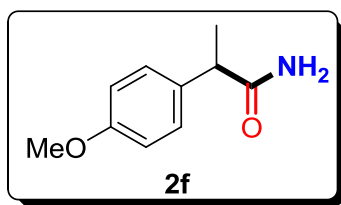

146.8 mg, 82% yield. **<sup>1</sup>H NMR** (400 MHz, CDCl<sub>3</sub>) δ 1.38 (d, *J* = 7.2 Hz, 3H), 3.43 (q, *J* = 7.2 Hz, 1H), 3.70 (s, 3H), 5.50 (br, 1H), 6.21 (br, 1H), 6.77 (d, *J* = 8.4 Hz, 2H), 7.12 (d, *J* = 8.8 Hz, 2H); **<sup>13</sup>C NMR** (100 MHz, CDCl<sub>3</sub>) δ 18.4, 45.7, 55.3, 114.3, 128.6, 133.4, 158.8, 177.6; **HRMS** (ESI) calcd. for C<sub>13</sub>H<sub>19</sub>NONa [M+Na]: 202.0838, found: 202.0838.

**2-(4-fluorophenyl)propanamide (2g):** The title compound was prepared according to

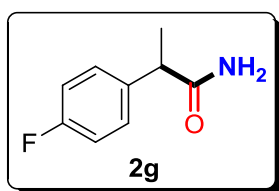

the general procedure and purified by column chromatography to give a white solid, 149.3 mg, 89% yield. **<sup>1</sup>H NMR** (400 MHz, CDCl<sub>3</sub>) δ 1.46 (d, *J* = 7.2 Hz, 3H), 3.54 (q, *J* = 7.2 Hz, 1H), 5.65 (br, 1H), 6.42 (br, 1H), 6.99-7.04 (m, 2H), 7.24-7.29 (m, 2H); **<sup>13</sup>C NMR** (100 MHz, CDCl<sub>3</sub>) δ 18.6, 45.7, 115.6, 115.8, 129.1, 129.1, 137.0, 137.0, 160.7, 163.2, 177.1; **<sup>19</sup>F NMR** (376 MHz, CDCl<sub>3</sub>) δ -115.37; **HRMS** (ESI) calcd. for C<sub>9</sub>H<sub>10</sub>FNONa [M+Na]: 190.0639, found: 190.0643.

**2-(4-chlorophenyl)propanamide (2h):** The title compound was prepared according to

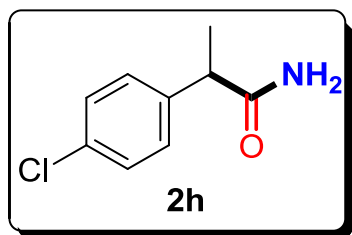

the general procedure and purified by column chromatography to give a white solid, 138.7 mg, 76% yield. **<sup>1</sup>H NMR** (400 MHz, CDCl<sub>3</sub>) δ 1.46 (d, *J* = 7.2 Hz, 3H), 3.53 (q, *J* = 7.2 Hz, 1H), 5.58 (br, 1H), 6.27 (br, 1H), 7.22-7.25 (m, 2H), 7.28-7.31 (m, 2H); **<sup>13</sup>C NMR** (100 MHz, CDCl<sub>3</sub>) δ 18.5, 45.9, 128.9, 129.0, 133.1, 139.7, 176.6; **HRMS** (ESI) calcd. for C<sub>9</sub>H<sub>11</sub>ClNO [M+H]: 184.0524, found: 184.0521.

**2-(2-chlorophenyl)propanamide (2i):** The title compound was prepared according to

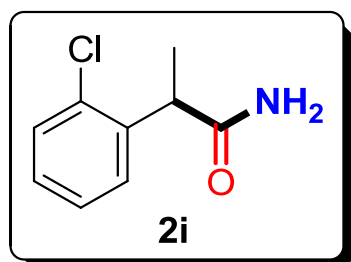

the general procedure and purified by column chromatography to give a white solid, 135.2 mg, 65% yield. **<sup>1</sup>H NMR** (400 MHz, CDCl<sub>3</sub>) δ 1.48 (d, *J* = 7.2 Hz, 3H), 4.08 (q, *J* = 7.2 Hz, 1H), 5.54 (br, 1H), 6.15

(br, 1H), 7.18-7.29 (m, 2H), 7.37-7.43 (m, 2H);  $^{13}\text{C}$  NMR (100 MHz,  $\text{CDCl}_3$ )  $\delta$  17.3, 42.5, 127.5, 128.5, 129.7, 133.6, 138.7, 175.9; **HRMS** (ESI) calcd. for  $\text{C}_9\text{H}_{10}\text{ClINa}$   $[\text{M}+\text{Na}]$ : 206.0343, found: 206.0350.

**2-(4-acetylphenyl)propanamide (2j)**: The title compound was prepared according to

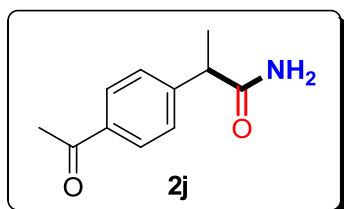

the general procedure and purified by column chromatography to give a white solid, 146.3 mg, 77% yield.  $^1\text{H}$  NMR (400 MHz,  $\text{DMSO}-d_6$ )  $\delta$  1.33 (d,  $J = 6.8$  Hz, 3H), 2.56 (s, 3H), 3.65 (q,  $J = 7.2$  Hz, 1H), 6.92 (br,

1H), 7.45-7.47 (m, 3H), 7.89 (d,  $J = 8.4$  Hz, 2H);  $^{13}\text{C}$  NMR (100 MHz,  $\text{DMSO}-d_6$ )  $\delta$  18.2, 26.6, 44.9, 127.5, 128.2, 135.2, 147.8, 174.6, 197.5; **HRMS** (ESI) calcd. for  $\text{C}_{11}\text{H}_{13}\text{NO}_2\text{Na}$   $[\text{M}+\text{Na}]$ : 214.0838, found: 214.0831.

**2-(2,6-dimethylphenyl)propanamide (2k)**: The title compound was prepared

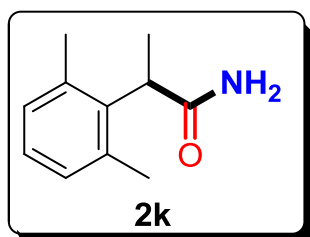

according to the general procedure and purified by column chromatography to give a white solid, 148.2 mg, 84% yield.

$^1\text{H}$  NMR (400 MHz,  $\text{CDCl}_3$ )  $\delta$  1.50 (d,  $J = 7.2$  Hz, 3H), 2.30-2.31 (m, 6H), 3.74 (q,  $J = 7.2$  Hz, 1H), 5.29 (br, 1H), 5.84 (br, 1H), 6.99-7.00 (m, 1H), 7.06-7.10 (m, 2H);  $^{13}\text{C}$

NMR (100 MHz,  $\text{CDCl}_3$ )  $\delta$  17.6, 19.1, 21.1, 43.0, 127.5, 128.0, 130.7, 133.0, 136.2, 139.1, 177.3; **HRMS** (ESI) calcd. for  $\text{C}_{11}\text{H}_{15}\text{NONa}$   $[\text{M}+\text{Na}]$ : 200.1046, found: 200.1041.

**2-(3,4-dichlorophenyl)propanamide (2l)**: The title compound was prepared

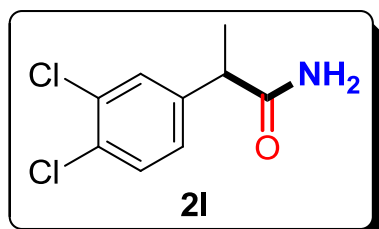

according to the general procedure and purified by column chromatography to give a white solid, 148.7 mg, 69% yield.  $^1\text{H}$  NMR (400 MHz,  $\text{CDCl}_3$ )  $\delta$  1.48 (d,  $J = 7.2$  Hz, 3H), 3.52 (q,  $J = 7.2$  Hz, 1H), 5.57 (br, 1H), 6.12 (br, 1H), 7.15-7.18 (m, 1H), 7.40-7.42 (m,



2H);  $^{13}\text{C}$  NMR (100 MHz,  $\text{CDCl}_3$ )  $\delta$  18.5, 45.7, 127.0, 129.6, 130.8, 131.4, 132.8, 141.3, 175.7; **HRMS** (ESI) calcd. for  $\text{C}_9\text{H}_{10}\text{Cl}_2\text{NO}$   $[\text{M}+\text{H}]$ : 218.0134, found: 218.0145.

**2-(naphthalen-2-yl)propanamide (2m)**: The title compound was prepared according

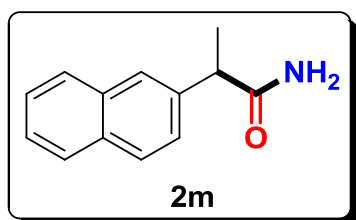

to the general procedure and purified by column chromatography to give a white solid, 141.3 mg, 71% yield.  $^1\text{H}$  NMR (400 MHz,  $\text{CDCl}_3$ )  $\delta$  1.58 (d,  $J = 7.2$  Hz, 3H), 3.71 (q,  $J = 7.2$  Hz, 1H), 5.45 (br, 1H), 5.97 (br, 1H), 7.25-7.50 (m, 3H), 7.74-7.82 (m, 4H);  $^{13}\text{C}$  NMR

(100 MHz,  $\text{CDCl}_3$ )  $\delta$  18.3, 46.7, 125.7, 126.0, 126.3, 126.4, 127.7, 127.7, 128.8, 132.6, 133.5, 138.7, 176.8; **HRMS** (ESI) calcd. for  $\text{C}_{13}\text{H}_{13}\text{NONa}$   $[\text{M}+\text{Na}]$ : 222.0889, found: 222.0896.

**2-(naphthalen-1-yl)propanamide (2n)**: The title compound was prepared according

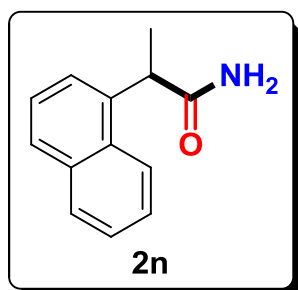

to the general procedure and purified by column chromatography to give a white solid, 135.2 mg, 68% yield.  $^1\text{H}$  NMR (400 MHz,  $\text{CDCl}_3$ )  $\delta$  1.63 (d,  $J = 7.2$  Hz, 3H), 4.24 (q,  $J = 7.2$  Hz, 1H), 5.37 (br, 1H), 6.09 (br, 1H), 7.24-7.52 (m, 4H), 7.75-7.77 (m, 1H), 7.83-7.85 (m, 1H), 8.00-8.02 (m, 1H);  $^{13}\text{C}$  NMR (100 MHz,  $\text{CDCl}_3$ )  $\delta$  17.9, 43.2, 123.3, 124.8,

125.7, 125.9, 126.6, 128.1, 129.0, 131.5, 134.1, 137.1, 177.5; **HRMS** (ESI) calcd. for  $\text{C}_{13}\text{H}_{13}\text{NONa}$   $[\text{M}+\text{Na}]$ : 222.0889, found: 222.0890.

**2-(phenanthren-9-yl)propanamide (2o)**: The title compound was prepared according

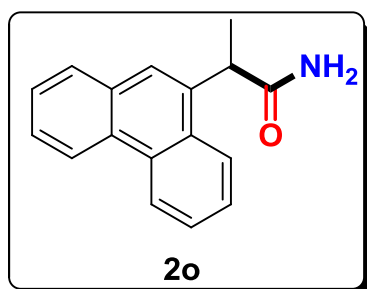

to the general procedure and purified by column chromatography to give a white solid, 169.0 mg, 68% yield.  $^1\text{H}$  NMR (400 MHz,  $\text{CDCl}_3$ )  $\delta$  1.78 (d,  $J = 7.2$  Hz, 3H), 4.30 (q,  $J = 7.2$  Hz, 1H), 5.37 (br, 1H), 5.51

(br, 1H), 7.61-7.69 (m, 4H), 7.77 (s, 1H), 7.87-7.89 (m, 1H), 8.09-8.12 (m, 1H), 8.66-8.68 (m, 1H), 8.74-8.76 (m, 1H);  $^{13}\text{C}$  NMR (100 MHz,  $\text{CDCl}_3$ )  $\delta$  17.6, 44.0, 122.5, 123.4, 124.1, 125.9, 126.8, 127.0, 127.0, 127.2, 128.6, 130.1, 130.4, 130.9, 131.4, 135.2, 177.1; HRMS (ESI) calcd. for  $\text{C}_{17}\text{H}_{15}\text{NONa}$   $[\text{M}+\text{Na}]$ : 272.1046, found: 272.1041.

**3-(1-carbamoyl-2-methylethyl)estrone (2p):** The title compound was prepared according to the

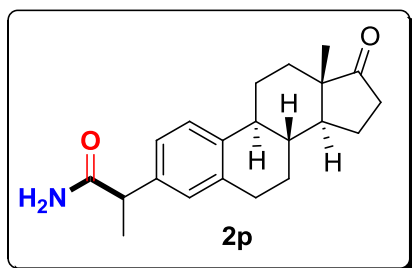

general procedure and purified by column chromatography to give a white solid, 145.1 mg, 45% yield.  $^1\text{H}$  NMR (400 MHz,  $\text{CDCl}_3$ )  $\delta$  0.91 (s, 3H), 1.39-1.68 (m, 9H), 1.95-2.19 (m, 4H), 2.27-2.31 (m, 1H), 2.40-2.54 (m, 2H), 2.89-2.92 (m,

2H), 3.51 (q,  $J = 7.2$  Hz, 1H), 5.51 (br, 1H), 6.00 (br, 1H), 7.05 (s, 1H), 7.08 (d,  $J = 8.4$  Hz, 1H), 7.25 (d,  $J = 7.6$  Hz, 1H);  $^{13}\text{C}$  NMR (100 MHz,  $\text{CDCl}_3$ )  $\delta$  13.9, 18.4, 21.6, 25.7, 26.5, 29.4, 31.6, 35.9, 38.1, 44.3, 46.1, 48.0, 50.5, 125.0, 125.0, 125.9, 128.1, 128.2, 137.1, 138.8, 138.9, 177.2, 221.0; HRMS (ESI) calcd. for  $\text{C}_{21}\text{H}_{27}\text{NO}_2\text{Na}$   $[\text{M}+\text{Na}]$ : 348.1934, found: 348.1933.

**2-methyl-3-phenylpropanamide (2q):** The title compound was prepared according to

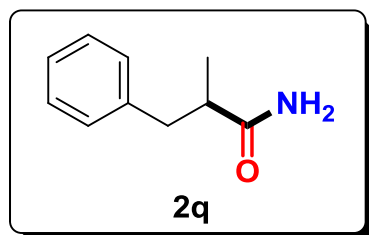

the general procedure and purified by column chromatography to give a white solid, 169.0 mg, 68% yield.  $^1\text{H}$  NMR (400 MHz,  $\text{CDCl}_3$ )  $\delta$  1.18 (d,  $J = 6.8$  Hz, 3H), 2.51-2.56 (m, 1H), 2.65-2.70 (m, 1H), 2.96-3.01 (m, 1H), 5.34 (br, 1H), 5.67 (br, 1H),

7.18-7.22 (m, 3H), 7.26-7.30 (m, 2H);  $^{13}\text{C}$  NMR (100 MHz,  $\text{CDCl}_3$ )  $\delta$  17.6, 40.3, 42.9, 126.4, 128.5, 129.0, 139.7, 178.3; HRMS (ESI) calcd. for  $\text{C}_{10}\text{H}_{13}\text{NONa}$   $[\text{M}+\text{Na}]$ : 186.0899, found: 186.0895.

**3-phenylpropanamide (3a):** The title compound was prepared according to the

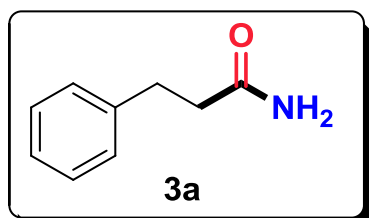

general procedure and purified by column chromatography to give a white solid, 107.6 mg, 72% yield.  $^1\text{H}$  NMR (400 MHz,  $\text{CDCl}_3$ )  $\delta$  2.51 (t,  $J = 7.6$  Hz, 2H), 2.95 (t,  $J = 8.0$  Hz, 2H), 5.59 (br, 1H), 6.03 (br, 1H), 7.19-7.21 (m, 3H), 7.26-7.30 (m, 2H);  $^{13}\text{C}$  NMR (100 MHz,  $\text{CDCl}_3$ )  $\delta$  31.4, 37.5, 126.3, 128.3, 128.6, 140.7, 174.9; HRMS (ESI) calcd. for  $\text{C}_9\text{H}_{11}\text{NONa}$  [ $\text{M}+\text{Na}$ ]: 172.0733, found: 172.0734.

**3-*p*-tolylpropanamide (3b):** The title compound was prepared according to the

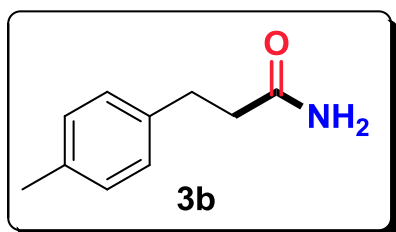

general procedure and purified by column chromatography to give a white solid, 118.6 mg, 73% yield.  $^1\text{H}$  NMR (400 MHz,  $\text{CDCl}_3$ )  $\delta$  2.31 (s, 3H), 2.49 (t,  $J = 7.2$  Hz, 2H), 2.91 (t,  $J = 8.0$  Hz, 2H), 5.56 (br, 1H), 5.99 (br, 1H), 7.09 (s, 4H);  $^{13}\text{C}$  NMR (100 MHz,  $\text{CDCl}_3$ )  $\delta$  21.0, 31.0, 37.7, 128.2, 128.5, 129.3, 135.8, 137.6, 175.0; HRMS (ESI) calcd. for  $\text{C}_{10}\text{H}_{13}\text{NONa}$  [ $\text{M}+\text{Na}$ ]: 186.0889, found: 186.0895.

**3-*m*-tolylpropanamide (3c):** The title compound was prepared according to the

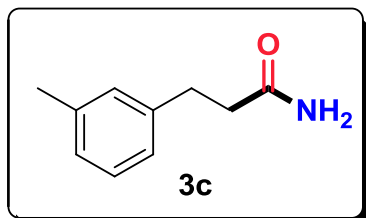

general procedure and purified by column chromatography to give a white solid, 112.5 mg, 69% yield.  $^1\text{H}$  NMR (400 MHz,  $\text{CDCl}_3$ )  $\delta$  2.31 (s, 3H), 2.49 (t,  $J = 7.6$  Hz, 2H), 2.90 (t,  $J = 7.6$  Hz, 2H), 5.68 (br, 1H), 6.18 (br, 1H), 6.98-7.01 (m, 3H), 7.15-7.18 (m, 1H);  $^{13}\text{C}$  NMR (100 MHz,  $\text{CDCl}_3$ )  $\delta$  21.4, 31.4, 37.6, 125.3, 127.0, 128.5, 129.1, 138.2, 140.7, 175.2; HRMS (ESI) calcd. for  $\text{C}_{10}\text{H}_{13}\text{NONa}$  [ $\text{M}+\text{Na}$ ]: 186.0889, found: 186.0893.

**3-*o*-tolylpropanamide (3d):** The title compound was prepared according to the

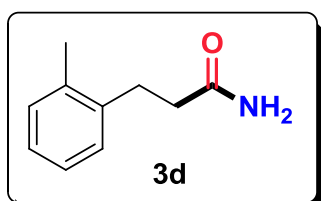

general procedure and purified by column chromatography to give a white solid, 140.2 mg, 86% yield.  $^1\text{H}$  NMR (400 MHz,  $\text{CDCl}_3$ )  $\delta$  2.31 (s, 3H), 2.46 (dd,  $J_1 = 8.0$  Hz,  $J_2 =$

10.0 Hz, 2H), 2.92 (dd,  $J_1 = 8.0$  Hz,  $J_2 = 10.0$  Hz, 2H), 5.70 (br, 1H), 6.22 (br, 1H), 7.10-7.15 (m, 4H);  $^{13}\text{C}$  NMR (100 MHz,  $\text{CDCl}_3$ )  $\delta$  19.3, 28.7, 36.2, 126.2, 126.4, 128.5, 130.4, 136.0, 138.9, 175.3; HRMS (ESI) calcd. for  $\text{C}_{10}\text{H}_{13}\text{NONa}$   $[\text{M}+\text{Na}]$ : 186.0889, found: 186.0893.

**3-(4-*tert*-butylphenyl)propanamide (3e):** The title compound was prepared according

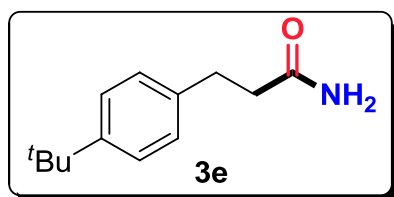

to the general procedure and purified by column chromatography to give a white solid, 158.1 mg, 77% yield.  $^1\text{H}$  NMR (400 MHz,  $\text{CDCl}_3$ )  $\delta$  1.30 (s, 9H), 2.49-2.53 (m, 2H), 2.92 (t,  $J = 8.0$  Hz, 2H), 5.69 (br, 1H), 6.18 (br, 1H), 7.13 (d,  $J = 8.4$  Hz, 2H), 7.29

(d,  $J = 8.4$  Hz, 2H);  $^{13}\text{C}$  NMR (100 MHz,  $\text{CDCl}_3$ )  $\delta$  30.9, 31.4, 34.4, 37.5, 125.5, 128.0, 137.6, 149.1, 175.3; HRMS (ESI) calcd. for  $\text{C}_{13}\text{H}_{19}\text{NONa}$   $[\text{M}+\text{Na}]$ : 228.1359, found: 228.1364.

**3-(4-methoxyphenyl)propanamide (3f):** The title compound was prepared according

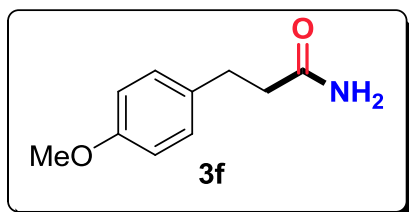

to the general procedure and purified by column chromatography to give a white solid, 124.0 mg, 69% yield.  $^1\text{H}$  NMR (400 MHz,  $\text{CDCl}_3$ )  $\delta$  2.49 (t,  $J = 8.0$  Hz, 2H), 2.90 (t,  $J = 8.0$  Hz, 2H), 3.78 (s, 3H), 5.49 (br, 1H), 5.80 (br, 1H), 6.82 (d,  $J = 8.8$  Hz,

2H), 7.11 (d,  $J = 8.8$  Hz, 2H);  $^{13}\text{C}$  NMR (100 MHz,  $\text{CDCl}_3$ )  $\delta$  30.6, 37.8, 55.3, 114.0, 129.3, 132.7, 158.1, 174.9; HRMS (ESI) calcd. for  $\text{C}_{10}\text{H}_{13}\text{NO}_2\text{Na}$   $[\text{M}+\text{Na}]$ : 202.0838, found: 202.0837.

**3-(4-fluorophenyl)propanamide (3g):** The title compound was prepared according to

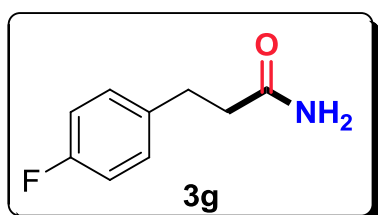

the general procedure and purified by column chromatography to give a white solid, 112.3 mg, 67% yield.  $^1\text{H}$  NMR (400 MHz,  $\text{CDCl}_3$ )  $\delta$  2.40 (t,  $J = 8.0$

Hz, 2H), 2.83 (t,  $J = 8.0$  Hz, 2H), 5.68 (br, 1H), 6.12 (br, 1H), 6.85-6.90 (m, 2H), 7.04-7.08 (m, 2H);  $^{13}\text{C}$  NMR (100 MHz,  $\text{CDCl}_3$ )  $\delta$  30.5, 37.5, 115.2, 115.4, 129.7, 129.8, 136.4, 136.4, 160.2, 162.7, 174.9;  $^{19}\text{F}$  NMR (376 MHz,  $\text{CDCl}_3$ )  $\delta$  -117.0; HRMS (ESI) calcd. for  $\text{C}_9\text{H}_{11}\text{FNONa}$  [ $\text{M}+\text{Na}$ ]: 168.0819, found: 168.0827.

**3-(4-chlorophenyl)propanamide (3h):** The title compound was prepared according to

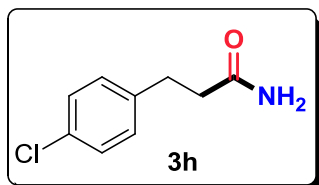

the general procedure and purified by column chromatography to give a white solid, 123.2 mg, 67% yield.

$^1\text{H}$  NMR (400 MHz,  $\text{CDCl}_3$ )  $\delta$  2.50 (t,  $J = 8.0$  Hz, 2H), 2.93 (t,  $J = 8.0$  Hz, 2H), 5.54 (br, 1H), 6.01 (br, 1H), 7.12 (d,  $J = 8.8$  Hz, 2H), 7.24-7.27 (m, 2H);  $^{13}\text{C}$  NMR (100 MHz,  $\text{CDCl}_3$ )  $\delta$  30.6, 37.3, 128.7, 129.7, 132.1, 139.1, 174.6; HRMS (ESI) calcd. for  $\text{C}_9\text{H}_{10}\text{ClINONa}$  [ $\text{M}+\text{Na}$ ]: 206.0343, found: 206.0350.

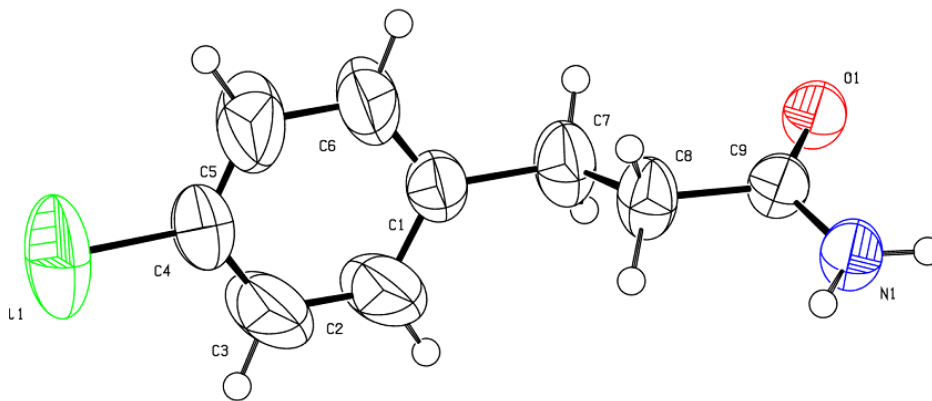

**Figure S2.** ORTEP drawing of product **3h**

**3-(2-chlorophenyl)propanamide (3i):** The title compound was prepared according to

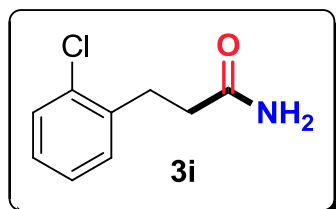

the general procedure and purified by column chromatography to give a white solid, 141.5 mg, 77% yield.  $^1\text{H}$  NMR (400 MHz,  $\text{CDCl}_3$ )  $\delta$  2.53 (t,  $J = 8.0$  Hz,

2H), 3.06 (t,  $J = 8.0$  Hz, 2H), 5.65 (br, 1H), 6.02 (br, 1H), 7.13-7.20 (m, 2H), 7.24-7.27 (m, 1H), 7.32-7.34 (m, 1H);  $^{13}\text{C}$  NMR (100 MHz,  $\text{CDCl}_3$ )  $\delta$  29.4, 35.5, 127.0, 127.9, 129.5, 130.6, 133.8, 138.2, 174.6; **HRMS** (ESI) calcd. for  $\text{C}_9\text{H}_{10}\text{ClN}\text{ONa}$   $[\text{M}+\text{Na}]$ : 206.0343, found: 206.0351.

**3-(4-acetylphenyl)propanamide (3j):** The title compound was prepared according to

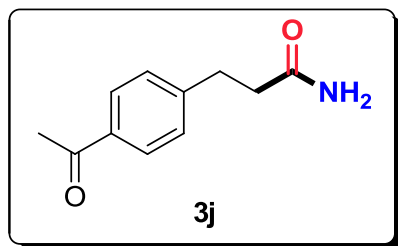

the general procedure and purified by column chromatography to give a white solid, 138.9 mg, 73% yield.  $^1\text{H}$  NMR (400 MHz,  $\text{DMSO}-d_6$ )  $\delta$  2.39 (t,  $J = 7.6$  Hz, 2H), 2.55 (s, 3H), 2.88 (t,  $J = 7.6$  Hz, 2H), 6.80 (br, 1H), 7.32 (br, 1H), 7.35 (d,  $J = 7.6$  Hz, 2H),

7.86 (d,  $J = 7.6$  Hz, 2H);  $^{13}\text{C}$  NMR (100 MHz,  $\text{DMSO}-d_6$ )  $\delta$  26.6, 30.7, 36.1, 128.3, 128.5, 134.8, 147.3, 173.1, 197.5; **HRMS** (ESI) calcd. for  $\text{C}_{11}\text{H}_{13}\text{NO}_2\text{Na}$   $[\text{M}+\text{Na}]$ : 214.0838, found: 214.0834.

**3-(2,6-dimethylphenyl)propanamide (3k):** The title compound was prepared

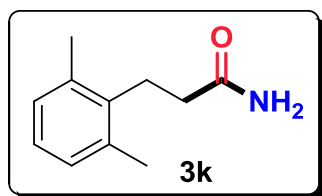

according to the general procedure and purified by column chromatography to give a white solid, 150.5 mg, 85% yield.  $^1\text{H}$  NMR (400 MHz,  $\text{CDCl}_3$ )  $\delta$  2.27-2.28 (m, 6H), 2.44 (dd,  $J_1 = 8.0$  Hz,  $J_2 = 10.0$  Hz, 2H), 2.88 (dd,  $J_1 = 8.0$  Hz,  $J_2 =$

10.0 Hz, 2H), 5.59 (br, 1H), 6.09 (br, 1H), 6.92-6.96 (m, 2H), 7.02-7.04 (d,  $J = 7.2$  Hz, 1H);  $^{13}\text{C}$  NMR (100 MHz,  $\text{CDCl}_3$ )  $\delta$  18.8, 21.0, 28.7, 36.3, 127.1, 129.4, 130.3, 132.8, 135.6, 138.6, 175.2; **HRMS** (ESI) calcd. for  $\text{C}_{11}\text{H}_{16}\text{NO}$   $[\text{M}+\text{H}]$ : 178.1233, found: 178.1236.

**3-(3,4-dichlorophenyl)propanamide (3l):** The title compound was prepared

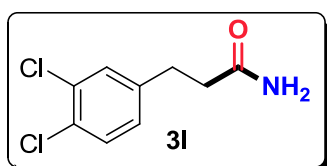

according to the general procedure and purified by column chromatography to give a white solid, 149.2 mg, 69% yield.  $^1\text{H}$  NMR (400 MHz,  $\text{CDCl}_3$ )  $\delta$  2.50 (t,  $J = 8.0$  Hz,

2H), 2.91 (t,  $J = 8.0$  Hz, 2H), 5.58 (br, 1H), 5.99 (br, 1H), 7.03-7.06 (m, 1H), 7.27-7.35 (m, 2H);  $^{13}\text{C}$  NMR (100 MHz,  $\text{CDCl}_3$ )  $\delta$  30.3, 36.8, 127.9, 130.3, 130.3, 130.4, 132.3, 141.0, 174.0; **HRMS** (ESI) calcd. for  $\text{C}_9\text{H}_{10}\text{Cl}_2\text{NO}$   $[\text{M}+\text{H}]$ : 218.0134, found: 218.0140.

**3-(naphthalen-2-yl)propanamide (3m):** The title compound was prepared according

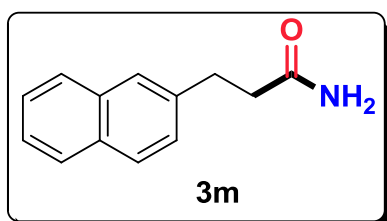

to the general procedure and purified by column chromatography to give a white solid, 154.3 mg, 78% yield.  $^1\text{H}$  NMR (400 MHz,  $\text{DMSO}-d_6$ )  $\delta$  2.45-2.51 (m, 2H), 2.99 (t,  $J = 8.0$  Hz, 2H), 6.82 (br, 1H), 7.35 (br, 1H), 7.40-7.50 (m, 3H), 7.70 (s, 1H), 7.82-7.87 (m, 3H);  $^{13}\text{C}$  NMR (100 MHz,  $\text{DMSO}-d_6$ )  $\delta$  31.0, 36.6, 125.2, 125.9, 126.0, 127.2, 127.3, 127.4, 127.6, 131.6, 133.1, 139.1, 173.4; **HRMS** (ESI) calcd. for  $\text{C}_{13}\text{H}_{14}\text{NO}$   $[\text{M}+\text{H}]$ : 200.1070, found: 200.1077.

**3-(naphthalen-1-yl)propanamide (3n):** The title compound was prepared according

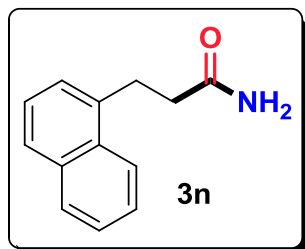

to the general procedure and purified by column chromatography to give a white solid, 162.7 mg, 82% yield.  $^1\text{H}$  NMR (400 MHz,  $\text{DMSO}-d_6$ )  $\delta$  2.48 (t,  $J = 8.0$  Hz, 2H), 3.28 (t,  $J = 8.0$  Hz, 2H), 6.85 (br, 1H), 7.37-7.45 (m, 3H), 7.50-7.59 (m, 2H), 7.77-7.79 (m, 1H), 7.92-7.94 (m, 1H), 8.08-8.10 (m, 1H);  $^{13}\text{C}$  NMR (100 MHz,  $\text{DMSO}-d_6$ )  $\delta$  27.9, 36.1, 123.5, 125.5, 125.6, 125.7, 126.0, 126.5, 128.6, 131.2, 133.4, 137.5, 173.4; **HRMS** (ESI) calcd. for  $\text{C}_{13}\text{H}_{14}\text{NO}$   $[\text{M}+\text{H}]$ : 200.1070, found: 200.1077.

**4,4-dimethylpentanamide (3o):** The title compound was prepared according to the

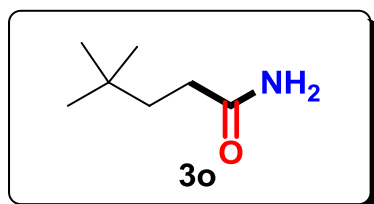

general procedure and purified by column chromatography to give a white solid, 95.1 mg, 74% yield.  $^1\text{H}$  NMR (400 MHz,  $\text{CDCl}_3$ )  $\delta$  0.91 (s, 9H),

1.53-1.57 (m, 2H), 2.17-2.21 (m, 2H), 5.71 (br, 1H), 6.20 (br, 1H);  $^{13}\text{C}$  NMR (100 MHz,  $\text{CDCl}_3$ )  $\delta$  29.1, 30.1, 31.6, 39.3, 176.7; HRMS (ESI) calcd. for  $\text{C}_7\text{H}_{15}\text{NONa}$   $[\text{M}+\text{Na}]$ : 152.1046, found: 152.1049.

**4-phenylbutanamide (3p):** The title compound was prepared according to the general

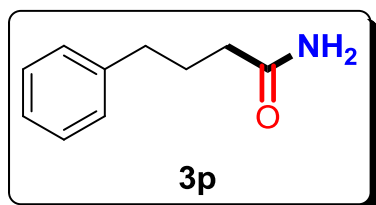

procedure and purified by column chromatography to give a white solid, 87.5 mg, 54% yield.  $^1\text{H}$  NMR (400 MHz,  $\text{CDCl}_3$ )  $\delta$  1.92-1.99 (m, 2H), 2.20 (t,  $J = 7.2$  Hz, 2H), 2.66 (t,  $J = 7.6$  Hz, 2H), 5.61 (br, 1H), 6.13 (br, 1H), 7.16-7.20 (m, 3H), 7.26-7.29 (m, 2H);  $^{13}\text{C}$  NMR

(100 MHz,  $\text{CDCl}_3$ )  $\delta$  26.9, 35.0, 35.1, 126.0, 128.4, 128.5, 141.4, 175.7; HRMS (ESI) calcd. for  $\text{C}_{10}\text{H}_{13}\text{NONa}$   $[\text{M}+\text{Na}]$ : 186.0889, found: 186.0887.

**4-cyclohexylbutanamide (3q):** The title compound was prepared according to the

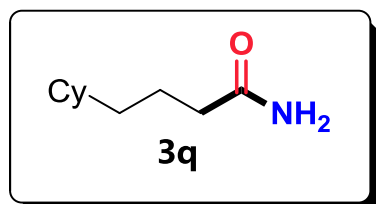

general procedure and purified by column chromatography to give a white solid, 93.8 mg, 56% yield.  $^1\text{H}$  NMR (400 MHz,  $\text{CDCl}_3$ )  $\delta$  0.82-0.91 (m, 2H), 1.07-1.25 (m, 6H), 1.61-1.80 (m, 7H), 2.00-2.24

(m, 2H), 5.43 (br, 2H);  $^{13}\text{C}$  NMR (100 MHz,  $\text{CDCl}_3$ )  $\delta$  22.9, 26.3, 26.6, 33.3, 36.2, 37.0, 37.4, 175.6; HRMS (ESI) calcd. for  $\text{C}_{10}\text{H}_{19}\text{NONa}$   $[\text{M}+\text{Na}]$ : 192.1359, found: 192.1359.

**tridecanamide (3r):** The title compound was prepared according to the general

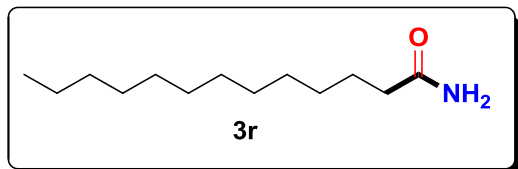

procedure and purified by column chromatography to give a white solid, 124.8 mg, 59% yield.  $^1\text{H}$  NMR (400 MHz,  $\text{DMSO}-d_6$ )  $\delta$  0.86 (t,  $J = 6.8$  Hz, 3H),

1.24-1.30 (m, 18H), 1.44-1.50 (m, 2H), 2.01 (t,  $J = 7.6$  Hz, 2H), 6.68 (br, 1H), 7.22 (br, 1H);  $^{13}\text{C}$  NMR (100 MHz,  $\text{DMSO}-d_6$ )  $\delta$  13.9, 22.1, 25.1, 28.7, 28.8, 28.9, 29.0, 29.0,



31.3, 35.1, 174.3; **HRMS** (ESI) calcd. for  $C_{13}H_{27}NONa$   $[M+Na]$ : 236.1985, found: 236.1982.

**Pentadecanamide (3s)**: The title compound was prepared according to the general

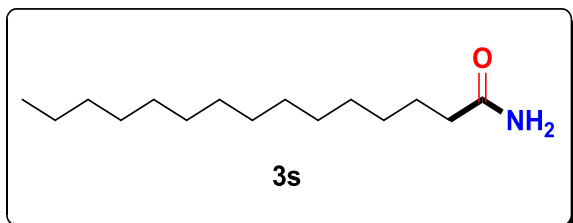

procedure and purified by column

chromatography to give a white solid,

135.3 mg, 56% yield.  **$^1H$  NMR** (400

MHz,  $DMSO-d_6$ )  $\delta$  0.86 (t,  $J$  = 6.8 Hz,

3H), 1.24-1.29 (m, 22H), 1.44-1.48 (m,

2H), 2.01 (t,  $J$  = 7.6 Hz, 2H), 6.68 (br, 1H), 7.23 (br, 1H);  **$^{13}C$  NMR** (100 MHz,

$DMSO-d_6$ )  $\delta$  13.9, 22.1, 25.1, 28.7, 28.8, 28.9, 29.0, 29.0, 31.3, 35.1, 174.4; **HRMS**

(ESI) calcd. for  $C_{15}H_{31}NONa$   $[M+Na]$ : 264.2298, found: 264.2299.

**7-chloroheptanamide (3t)**: The title compound was prepared according to the general

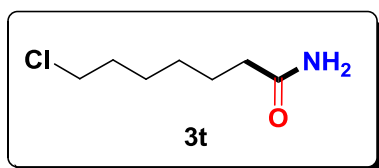

procedure and purified by column chromatography to

give a white solid, 103.5 mg, 63% yield.  **$^1H$  NMR**

(400 MHz,  $Acetone-d_6$ )  $\delta$  1.31-1.39 (m, 2H),

1.41-1.49 (m, 2H), 1.56-1.63 (m, 2H), 1.73-1.80 (m,

2H), 2.17 (t,  $J$  = 7.2 Hz, 2H), 3.60 (t,  $J$  = 6.8 Hz, 2H), 6.26 (br, 1H), 6.76 (br, 1H);  **$^{13}C$**

**NMR** (100 MHz,  $Acetone-d_6$ )  $\delta$  25.2, 26.4, 28.3, 32.4, 35.1, 44.9, 174.3; **HRMS** (ESI)

calcd. for  $C_7H_{14}NOCINa$   $[M+Na]$ : 186.0656, found: 186.0651.

**8-bromooctanamide (3u)**: The title compound was prepared according to the general

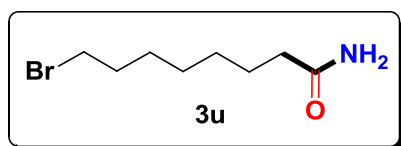

procedure and purified by column chromatography

to give a white solid, 112.5 mg, 51% yield.  **$^1H$**

**NMR** (400 MHz,  $Acetone-d_6$ )  $\delta$  1.33-1.46 (m, 6H),

1.57-1.60 (m, 2H), 1.73-1.80 (m, 2H), 2.16 (t,  $J$  =

7.2 Hz, 2H), 3.60 (t,  $J$  = 6.4 Hz, 2H), 6.14 (br, 1H), 6.71 (br, 1H);  **$^{13}C$  NMR** (100 MHz,

$Acetone-d_6$ )  $\delta$  25.3, 26.5, 28.5, 32.5, 35.2, 44.9, 174.2; **HRMS** (ESI) calcd. for

$C_{18}H_{16}NOBrNa$   $[M+Na]$ : 244.0307, found: 244.0302.

**Methyl 12-amino-12-oxododecanoate (3v):** The title compound was prepared

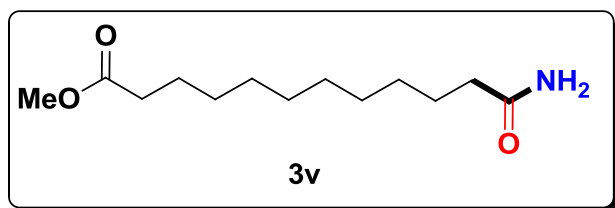

according to the general procedure and purified by column chromatography to give a white solid, 134.7 mg, 55% yield.  $^1\text{H}$

**NMR** (400 MHz, DMSO- $d_6$ )  $\delta$  1.24 (m, 12H), 1.44-1.52 (m, 4H), 2.01 (t,  $J = 7.2$  Hz, 2H), 2.28 (t,  $J = 7.2$  Hz, 2H), 3.58 (s, 3H), 6.68 (br, 1H), 7.22 (br, 1H);  $^{13}\text{C}$  **NMR** (100 MHz, DMSO- $d_6$ )  $\delta$  24.9, 25.6, 28.9, 29.1, 29.2, 29.3, 29.3, 29.4, 33.7, 35.6, 51.6, 173.8, 174.8; **HRMS** (ESI) calcd. for  $\text{C}_{13}\text{H}_{25}\text{NO}_3\text{Na}$  [ $\text{M}+\text{Na}$ ]: 266.1727, found: 266.1731.

**5-phenoxy pentanamide (3w):** The title compound was prepared according to the

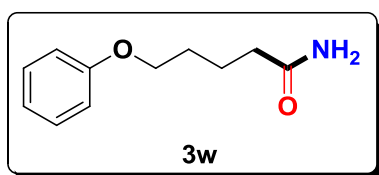

general procedure and purified by column chromatography to give a white solid, 121.3 mg, 63% yield.  $^1\text{H}$  **NMR** (400 MHz, DMSO- $d_6$ )  $\delta$  1.61-1.71 (m, 4H), 2.11 (t,  $J = 7.6$  Hz, 2H), 3.95 (t,  $J = 6.0$  Hz, 2H),

6.75 (br, 1H), 6.89-6.93 (m, 3H), 7.25-7.29 (m, 3H);  $^{13}\text{C}$  **NMR** (100 MHz, DMSO- $d_6$ )  $\delta$  22.9, 28.1, 35.0, 37.7, 123.4, 132.0, 134.8, 168.4, 174.4; **HRMS** (ESI) calcd. for  $\text{C}_{11}\text{H}_{15}\text{NO}_2\text{Na}$  [ $\text{M}+\text{Na}$ ]: 216.0995, found: 216.0993.

**5-(1,3-dioxoisindolin-2-yl)pentanamide (3x):** The title compound was prepared

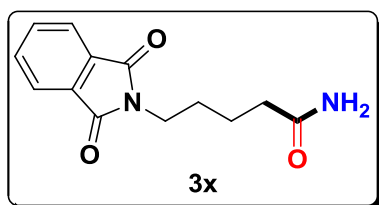

according to the general procedure and purified by column chromatography to give a white solid, 131.2 mg, 53% yield.  $^1\text{H}$  **NMR** (400 MHz, DMSO- $d_6$ )  $\delta$  1.45-1.62 (m, 4H), 2.08 (t,  $J = 7.2$  Hz, 2H), 3.57 (t,  $J =$

6.8 Hz, 2H), 6.74 (br, 1H), 7.26 (br, 1H), 7.82-7.88 (m, 4H);  $^{13}\text{C}$  **NMR** (100 MHz, DMSO- $d_6$ )  $\delta$  22.9, 28.1, 35.0, 37.7, 123.4, 132.0, 134.8, 168.4, 174.4; **HRMS** (ESI) calcd. for  $\text{C}_{13}\text{H}_{14}\text{N}_2\text{O}_3\text{Na}$  [ $\text{M}+\text{Na}$ ]: 269.0897, found: 269.0889.

**5-(Naphthalen-2-yloxy)pentanamide (3y):** The title compound was prepared

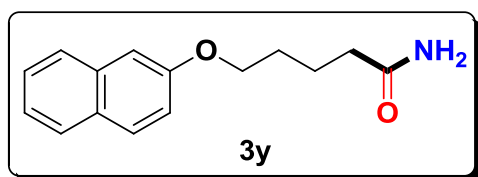

according to the general procedure and purified by column chromatography to give a white solid, 171.1 mg, 70% yield.  $^1\text{H}$  NMR (400 MHz, DMSO- $d_6$ )  $\delta$  1.65-1.73 (m, 2H),

1.75-1.82 (m, 2H), 2.15 (t,  $J$  = 7.2 Hz, 2H), 4.09 (t,  $J$  = 6.4 Hz, 2H), 6.78 (br, 1H), 7.15-7.18 (m, 1H), 7.31-7.36 (m, 3H), 7.44-7.47 (m, 1H), 7.79-7.83 (m, 3H);  $^{13}\text{C}$  NMR (100 MHz, DMSO- $d_6$ )  $\delta$  22.3, 28.7, 35.2, 67.7, 107.0, 119.2, 123.9, 126.8, 127.1, 128.0, 128.9, 129.7, 134.8, 157.0, 174.6; HRMS (ESI) calcd. for  $\text{C}_{15}\text{H}_{17}\text{NO}_2\text{Na}$  [M+Na]: 266.1151, found: 266.1162.

**3-(2-carbamoylethyl)estrone (3z):** The title compound was prepared according to the

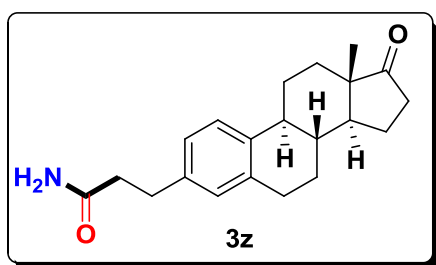

general procedure and purified by column chromatography to give a white solid, 210.2 mg, 65% yield.  $^1\text{H}$  NMR (400 MHz,  $\text{CDCl}_3$ )  $\delta$  0.90 (s, 3H), 1.37-1.67 (m, 6H), 1.93-2.18 (m, 4H), 2.24-2.28 (m, 1H), 2.38-2.41 (m, 1H), 2.47-2.54

(m, 3H), 2.88-2.92 (m, 4H), 5.69 (br, 1H), 5.99 (br, 1H), 6.95 (s, 1H), 6.99 (d,  $J$  = 8.0 Hz, 1H), 7.20 (d,  $J$  = 8.0 Hz, 1H);  $^{13}\text{C}$  NMR (100 MHz,  $\text{CDCl}_3$ )  $\delta$  13.9, 21.6, 25.8, 26.6, 29.4, 30.9, 31.6, 35.9, 37.5, 38.2, 44.3, 48.0, 50.5, 125.6, 125.7, 129.0, 136.7, 137.7, 138.2, 175.0, 221.1; HRMS (ESI) calcd. for  $\text{C}_{21}\text{H}_{27}\text{NO}_2\text{Na}$  [M+Na]: 348.1934, found: 348.1918.

**3-phenylbutanamide (5a):** The title compound was prepared according to the general

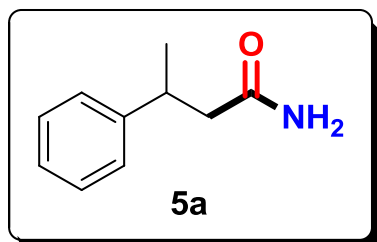

procedure and purified by column chromatography to give a white solid, 132.9 mg, 82% yield.  $^1\text{H}$  NMR (400 MHz,  $\text{CDCl}_3$ )  $\delta$  1.29 (d,  $J$  = 8.0 Hz, 3H), 2.37-2.42 (m, 1H), 2.46-2.52 (m, 1H), 3.20-3.29 (m,

1H), 5.68 (br, 1H), 6.16 (br, 1H), 7.17-7.22 (m, 3H), 7.25-7.30 (m, 2H);  $^{13}\text{C}$  NMR (100 MHz,  $\text{CDCl}_3$ )  $\delta$  21.8, 36.7, 44.7, 126.5, 126.8, 128.6, 145.9, 174.7; **HRMS** (ESI) calcd. for  $\text{C}_{10}\text{H}_{14}\text{NO}$   $[\text{M}+\text{H}]$ : 164.1073, found: 164.1070.

**3-*p*-tolylbutanamide (5b):** The title compound was prepared according to the general

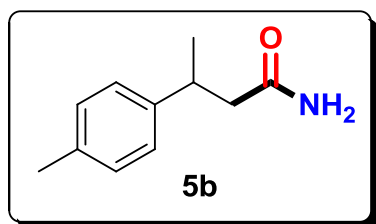

procedure and purified by column chromatography to give a white solid, 125.3 mg, 71% yield.  $^1\text{H}$  NMR (400 MHz,  $\text{CDCl}_3$ )  $\delta$  1.28 (d,  $J$  = 6.8 Hz, 3H), 2.31 (s, 3H), 2.36-2.42 (m, 1H), 2.46-2.51 (m, 1H), 3.17-3.26 (m, 1H), 5.52 (br, 1H), 6.00 (br, 1H), 7.09-7.13 (m,

4H);  $^{13}\text{C}$  NMR (100 MHz,  $\text{CDCl}_3$ )  $\delta$  21.0, 21.9, 36.4, 44.9, 126.6, 129.3, 136.0, 142.8, 174.7; **HRMS** (ESI) calcd. for  $\text{C}_{11}\text{H}_{16}\text{NO}$   $[\text{M}+\text{H}]$ : 178.1226, found: 178.1233.

**3-(4-isobutylphenyl)butanamide (5c):** The title compound was prepared according to

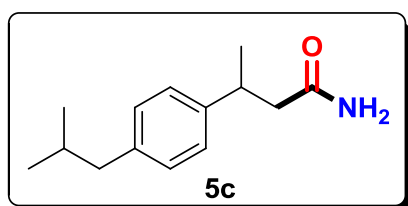

the general procedure and purified by column chromatography to give a white solid, 161.2 mg, 74% yield.  $^1\text{H}$  NMR (400 MHz,  $\text{CDCl}_3$ )  $\delta$  0.81 (d,  $J$  = 6.8 Hz, 6H), 1.23 (d,  $J$  = 6.8 Hz, 3H), 1.71-1.81

(m, 1H), 2.31-2.37 (m, 3H), 2.41-2.46 (m, 1H), 3.12-3.21 (m, 1H), 5.26 (br, 1H), 5.57 (br, 1H), 6.99 (d,  $J$  = 8.0 Hz, 2H), 7.05 (d,  $J$  = 8.0 Hz, 2H);  $^{13}\text{C}$  NMR (100 MHz,  $\text{CDCl}_3$ )  $\delta$  21.8, 22.4, 30.2, 36.4, 45.0, 45.0, 126.4, 129.3, 139.8, 143.0, 174.4; **HRMS** (ESI) calcd. for  $\text{C}_{14}\text{H}_{21}\text{NONa}$   $[\text{M}+\text{Na}]$ : 242.1515, found: 242.1517.

**3-(4-methoxyphenyl)butanamide (5d):** The title compound was prepared according

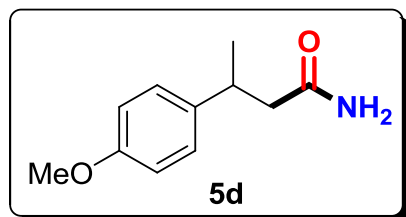

to the general procedure and purified by column chromatography to give a white solid, 173.1 mg, 90% yield.  $^1\text{H}$  NMR (400 MHz,  $\text{CDCl}_3$ )  $\delta$  1.29 (d,  $J$  = 6.8 Hz, 3H), 2.37-2.50 (m, 2H), 3.20-3.25 (m, 1H), 3.78 (s, 3H), 5.38 (br, 1H), 5.73 (br, 1H), 6.83-6.85 (m, 2H), 7.14-7.16 (m, 2H);

**$^{13}\text{C}$  NMR** (100 MHz,  $\text{CDCl}_3$ )  $\delta$  22.0, 36.0, 45.1, 55.2, 114.0, 127.7, 137.8, 158.1, 174.4; **HRMS** (ESI) calcd. for  $\text{C}_{11}\text{H}_{15}\text{NO}_2\text{Na}$  [ $\text{M}+\text{Na}$ ]: 216.0995, found: 216.1000.

**3-(2-methoxyphenyl)butanamide (5e):** The title compound was prepared according

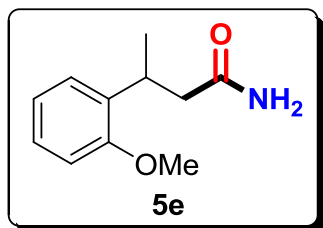

to the general procedure and purified by column chromatography to give a white solid, 154.1 mg, 80% yield.

**$^1\text{H}$  NMR** (400 MHz,  $\text{CDCl}_3$ )  $\delta$  1.28 (d,  $J = 6.8$  Hz, 3H), 2.35-2.41 (m, 1H), 2.59-2.64 (m, 1H), 3.57-3.66 (m, 1H), 3.83 (s, 3H), 5.60 (br, 1H), 5.90 (br, 1H), 6.85-6.94 (m, 2H), 7.17-7.21 (m, 2H);  **$^{13}\text{C}$  NMR** (100 MHz,  $\text{CDCl}_3$ )  $\delta$  20.2, 30.2, 43.4, 55.4, 110.7, 120.8, 126.9, 127.4, 133.7, 156.7, 175.0; **HRMS** (ESI) calcd. for  $\text{C}_{11}\text{H}_{15}\text{NO}_2\text{Na}$  [ $\text{M}+\text{Na}$ ]: 216.0995, found: 216.1001.

**3-(2-chlorophenyl)butanamide (5f):** The title compound was prepared according to

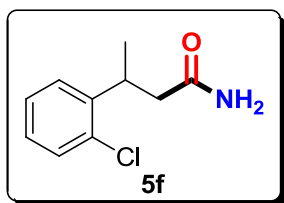

the general procedure and purified by column chromatography to give a white solid, 139.8 mg, 71% yield.

**$^1\text{H}$  NMR** (400 MHz,  $\text{CDCl}_3$ )  $\delta$  1.32 (d,  $J = 6.8$  Hz, 3H), 2.34-2.40 (m, 1H), 2.60-2.65 (m, 1H), 3.71-3.80 (m, 1H), 5.61 (br, 1H), 6.05 (br, 1H), 7.12-7.16 (m, 1H), 7.21-7.28 (m, 2H), 7.34-7.36 (m, 1H);  **$^{13}\text{C}$  NMR** (100 MHz,  $\text{CDCl}_3$ )  $\delta$  20.1, 33.0, 43.0, 127.2, 127.6, 129.8, 133.5, 142.7, 174.1; **HRMS** (ESI) calcd. for  $\text{C}_{10}\text{H}_{13}\text{NClO}$  [ $\text{M}+\text{H}$ ]: 198.0680, found: 198.0686.

**3-(3,5-bis(trifluoromethyl)phenyl)butanamide (5g):** The title compound was

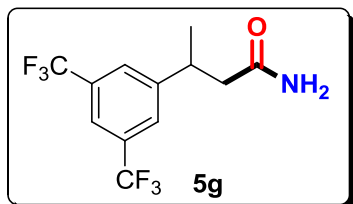

prepared according to the general procedure and purified by column chromatography to give a white solid, 218.3 mg, 73% yield.  **$^1\text{H}$  NMR** (400 MHz,  $\text{CDCl}_3$ )  $\delta$  1.36 (d,  $J = 6.8$  Hz, 3H), 2.50-2.52 (m, 2H), 3.46-3.52 (m, 1H), 5.52 (br, 1H), 5.94 (br, 1H), 7.69 (s, 2H), 7.73 (s, 1H);

**$^{13}\text{C}$  NMR** (100 MHz,  $\text{CDCl}_3$ )  $\delta$  21.3, 36.2, 43.9, 119.3, 120.5, 120.5, 120.6, 122.0,

124.7, 127.2, 127.4, 131.2, 131.6, 131.9, 132.2, 148.4, 173.0; **<sup>19</sup>F NMR** (376 MHz, CDCl<sub>3</sub>)  $\delta$  -62.86; **HRMS** (ESI) calcd. for C<sub>12</sub>H<sub>11</sub>F<sub>6</sub>NONa [M+Na]: 322.0637, found: 322.0636.

**3-(naphthalen-2-yl)butanamide (5h):** The title compound was prepared according to

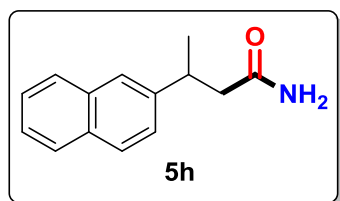

the general procedure and purified by column chromatography to give a white solid, 151.4 mg, 71% yield. **<sup>1</sup>H NMR** (400 MHz, CDCl<sub>3</sub>)  $\delta$  1.46 (d, *J* = 6.8 Hz, 3H), 2.45-2.51 (m, 1H), 2.73-2.78 (m, 1H), 4.16-4.21 (m, 1H), 5.34 (br, 1H), 5.50 (br, 1H), 7.38-7.56 (m, 4H), 7.72-7.74 (m, 1H), 7.85-7.87 (m, 1H), 8.20-8.22 (m, 1H); **<sup>13</sup>C NMR** (100 MHz, CDCl<sub>3</sub>)  $\delta$  21.1, 30.9, 44.1, 122.4, 123.1, 125.5, 125.6, 126.2, 127.0, 129.0, 131.2, 134.0, 141.8, 174.1; **HRMS** (ESI) calcd. for C<sub>14</sub>H<sub>16</sub>NO [M+H]: 214.1226, found: 214.1226.

**3-(thiophen-2-yl)butanamide (5i):** The title compound was prepared according to the

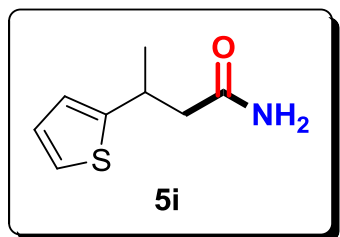

general procedure and purified by column chromatography to give a white solid, 87.9 mg, 52% yield. **<sup>1</sup>H NMR** (400 MHz, CDCl<sub>3</sub>)  $\delta$  1.40 (d, *J* = 6.8 Hz, 3H), 2.43-2.49 (m, 1H), 2.55-2.60 (m, 1H), 3.58-3.66 (m, 1H), 5.40 (br, 1H), 5.63 (br, 1H), 6.86-6.87 (m, 1H), 6.91-6.94 (m, 1H), 7.14-7.15 (m, 1H); **<sup>13</sup>C NMR** (100 MHz, CDCl<sub>3</sub>)  $\delta$  22.7, 32.3, 45.7, 123.1, 123.2, 126.7, 149.8, 173.6; **HRMS** (ESI) calcd. for C<sub>8</sub>H<sub>11</sub>SNONa [M+Na]: 192.0454, found: 192.0451.

**4-methyl-3-phenylpentanamide (5j):** The title compound was prepared according to

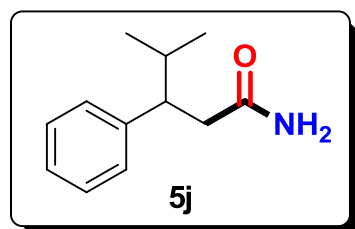

the general procedure and purified by column chromatography to give a white solid, 131.7 mg, 69% yield. **<sup>1</sup>H NMR** (400 MHz, CDCl<sub>3</sub>)  $\delta$  0.67 (d, *J* = 6.8 Hz, 3H), 0.87 (d, *J* = 6.8 Hz, 3H), 1.75-1.83 (m, 1H),

2.34-2.41 (m, 1H), 2.58-2.62 (m, 1H), 2.74-2.79 (m, 1H), 5.26 (br, 1H), 5.64 (br, 1H), 7.07-7.14 (m, 3H), 7.18-7.22 (m, 2H);  $^{13}\text{C}$  NMR (100 MHz,  $\text{CDCl}_3$ )  $\delta$  20.3, 20.8, 33.1, 40.3, 49.3, 126.5, 128.2, 128.3, 142.9, 174.9; **HRMS** (ESI) calcd. for  $\text{C}_{12}\text{H}_{18}\text{NO}$   $[\text{M}+\text{H}]$ : 192.1383, found: 192.1388.

**3,3-diphenylpropanamide (5k):** The title compound was prepared according to the general procedure and purified by column

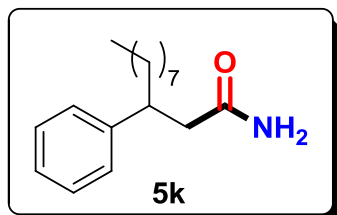

chromatography to give a white solid, 114.3 mg, 51% yield.  $^1\text{H}$  NMR (400 MHz,  $\text{CDCl}_3$ )  $\delta$  0.76-0.80 (m, 3H), 1.03-1.21 (m, 12H), 1.50-1.64 (m, 2H), 2.34-2.47 (m, 2H), 2.95-3.02 (m, 1H), 5.17 (br, 1H), 5.47 (br, 1H), 7.11-7.15

(m, 3H), 7.19-7.24 (m, 2H);  $^{13}\text{C}$  NMR (100 MHz,  $\text{CDCl}_3$ )  $\delta$  14.1, 22.6, 27.4, 29.2, 29.4, 29.5, 31.8, 36.3, 42.7, 43.8, 126.5, 127.5, 128.6, 144.3, 174.3; **HRMS** (ESI) calcd. for  $\text{C}_{17}\text{H}_{28}\text{NO}$   $[\text{M}+\text{H}]$ : 262.2165, found: 262.2166.

**3,3-diphenylpropanamide (5l):** The title compound was prepared according to the

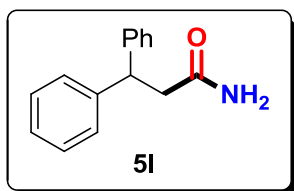

general procedure and purified by column chromatography to give a white solid, 144.3 mg, 51% yield.  $^1\text{H}$  NMR (400 MHz,  $\text{CDCl}_3$ )  $\delta$  2.92 (d,  $J = 6.8$  Hz, 2H), 4.54 (t,  $J = 6.8$  Hz, 1H), 5.35 (br, 1H), 5.57 (br, 1H), 7.16-7.30 (m, 10H);  $^{13}\text{C}$  NMR

(100 MHz,  $\text{CDCl}_3$ )  $\delta$  41.4, 46.1, 125.6, 126.7, 127.6, 142.6, 172.5; **HRMS** (ESI) calcd. for  $\text{C}_{15}\text{H}_{15}\text{NONa}$   $[\text{M}+\text{Na}]$ : 248.1046, found: 248.1051.

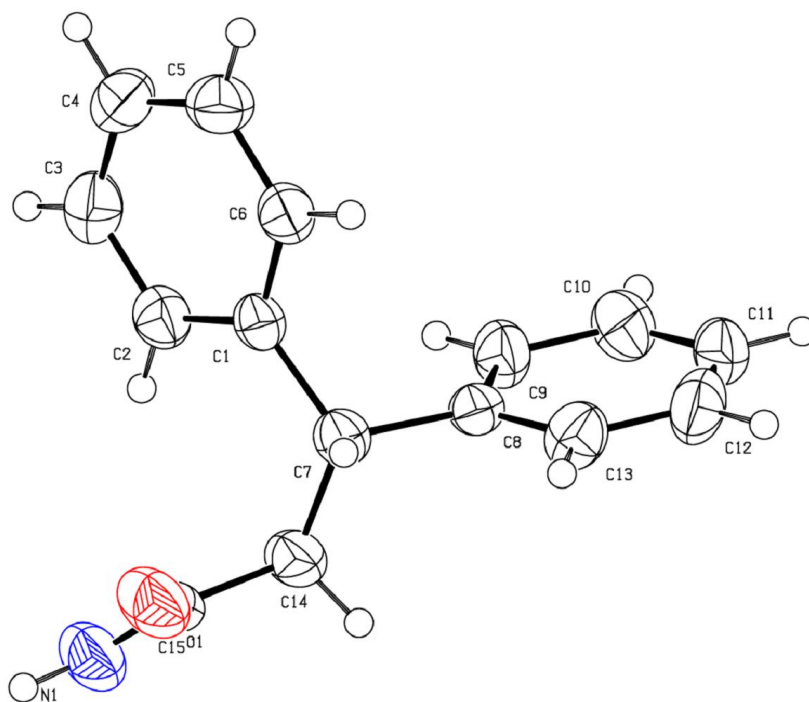

**Figure S3.** ORTEP drawing of product **5l**

**Bicyclo[2.2.1]heptane-2-carboxamide (5m):** The title compound was prepared

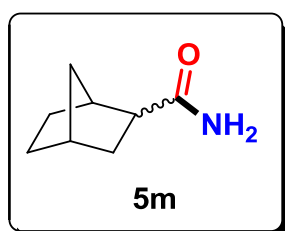

according to the general procedure and purified by column chromatography to give a white solid, 106.8 mg, 77% yield.

**<sup>1</sup>H NMR** (400 MHz, CDCl<sub>3</sub>) δ 1.16-1.26 (m, 3H), 1.38-1.67 (m, 4H), 1.83-1.89 (m, 1H), 2.17-2.21 (m, 0.83H), 2.27-2.30 (m, 1H), 2.35-2.43 (m, 1H), 2.66-2.72 (m, 0.15H), 5.47 (br, 1H), 5.71 (br, 1H);

**<sup>13</sup>C NMR** (100 MHz, CDCl<sub>3</sub>) δ 24.3, 28.6, 29.2, 29.7, 31.4, 34.3, 35.9, 36.5, 40.5, 40.9, 41.4, 47.4, 178.4; **HRMS** (ESI) calcd. for C<sub>11</sub>H<sub>13</sub>NONa [M+Na]: 162.0889, found: 162.0891.

**Cyclooct-4-enecarboxamide (5n):** The title compound was prepared according to the

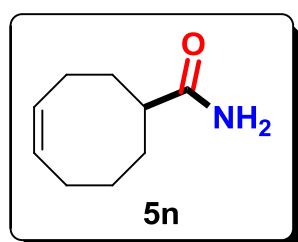

general procedure and purified by column chromatography to give a white solid, 94.9 mg, 62% yield. **<sup>1</sup>H NMR** (400 MHz, DMSO-*d*<sub>6</sub>) δ 1.30-1.40 (m, 1H), 1.44-1.54 (m, 2H), 1.59-1.66 (m, 2H), 1.74-1.78 (m, 1H), 2.01-2.06 (m, 1H), 2.08-2.12 (m, 2H), 2.14-2.21 (m, 1H), 2.29-2.33 (m, 1H),



5.62-5.65 (m, 2H), 5.68 (br, 1H), 6.56 (br, 1H);  $^{13}\text{C}$  NMR (100 MHz, DMSO- $d_6$ )  $\delta$  24.0, 25.4, 27.5, 29.8, 32.0, 43.7, 129.9, 178.9; HRMS (ESI) calcd. for  $\text{C}_9\text{H}_{15}\text{NONa}$  [M+Na]: 176.1046, found: 176.1052.

**Cyclohexanecarboxamide (5o):** The title compound was prepared according to the

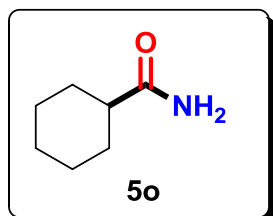

general procedure and purified by column chromatography to give a white solid, 101.3 mg, 79% yield.  $^1\text{H}$  NMR (400 MHz,  $\text{CDCl}_3$ )  $\delta$  1.19-1.34 (m, 3H), 1.38-1.48 (m, 2H), 1.66-1.70 (m, 1H), 1.78-1.82 (m, 2H), 1.88-1.92 (m, 2H), 2.11-2.19 (m, 1H), 5.50 (br, 1H), 5.68 (br, 1H);  $^{13}\text{C}$  NMR (100 MHz,  $\text{CDCl}_3$ )  $\delta$

25.7, 25.7, 29.7, 44.8, 178.7; HRMS (ESI) calcd. for  $\text{C}_7\text{H}_{14}\text{NO}$  [M+H]: 128.1070, found: 128.1071.

**3-Azabicyclo[3.3.1]nonane-2,4-dione (5p):** The title compound was prepared

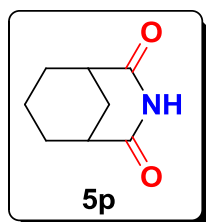

according to the general procedure and purified by column chromatography to give a white solid, 90.0 mg, 65% yield.  $^1\text{H}$  NMR (400 MHz,  $\text{CDCl}_3$ )  $\delta$  1.47-1.57 (m, 1H), 1.67-1.82 (m, 4H), 2.00-2.05 (m, 2H), 2.21-2.26 (m, 1H), 2.83 (m, 2H), 8.13 (br, 1H);  $^{13}\text{C}$  NMR (100 MHz,  $\text{CDCl}_3$ )  $\delta$  19.5, 28.0, 29.0, 37.8, 175.9;

HRMS (ESI) calcd. for  $\text{C}_8\text{H}_{11}\text{NO}_2\text{Na}$  [M+Na]: 176.0682, found: 176.0677.

## 5. Application of primary amides

### 5.1 Synthesis of the antibacterial drug of 3,4-dihydroquinolin-2(1H)-one

#### 5.1.1 Synthesis of 3-(2-bromophenyl)propanamide (3t')

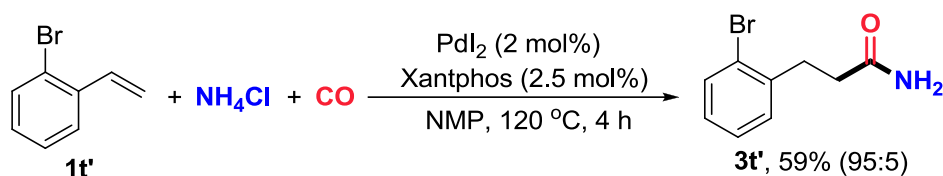

Following our general procedure: In the glove box, a mixture of  $\text{NH}_4\text{Cl}$  (106.8 mg, 2.0 mmol),  $\text{PdI}_2$  (7.2 mg, 0.02 mmol), Xantphos (14.5 mg, 0.025 mmol) and NMP (3.0 mL) was added into a dry glass vessel. The resulting mixture was stirred for 10 minutes at room temperature and then 1-bromo-2-vinylbenzene **1t'** (183mg, 1.0 mmol) was added into the reaction mixture. The glass vessel was put into an autoclave and then taken out from the glove box. The autoclave was purged and charged with CO (30 atm). The reaction mixture was stirred at 120 °C for 4 hours. After the reaction finished, the autoclave was cooled to room temperature and the pressure was carefully released in the fume hood. The regioselectivity were measured by GC and GC-MS, respectively. Then the corresponding reaction mixture was purified by flash column chromatography on silica gel and eluted with petroleum ether/ethyl acetate (100/1 - 1/1) to give the desired products **3-(2-bromophenyl)propanamide (3t')**.

**3-(2-bromophenyl)propanamide (3t')**: The title compound was prepared according to

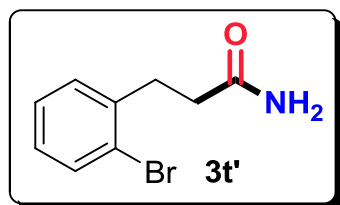

the general procedure and purified by column chromatography to give a white solid, 135.1 mg, 59% yield.  $^1\text{H}$  NMR (400 MHz,  $\text{CDCl}_3$ )  $\delta$  2.54 (t,  $J$  = 8.0 Hz, 2H), 3.07 (t,  $J$  = 8.0 Hz, 2H), 5.56 (br, 1H), 5.92 (br, 1H),

7.06-7.10 (m, 1H), 7.21-7.28 (m, 2H), 7.52-7.54 (m, 1H);  $^{13}\text{C}$  NMR (100 MHz,  $\text{CDCl}_3$ )  $\delta$  31.9, 35.7, 124.3, 127.7, 128.1, 130.7, 132.9, 139.9, 174.4; HRMS (ESI) calcd. for  $\text{C}_9\text{H}_{11}\text{BrNO}$  [ $\text{M}+\text{H}$ ]: 228.0019, found: 228.0025.

### 5.1.2 Synthesis of 3,4-dihydroquinolin-2(1H)-one (10)

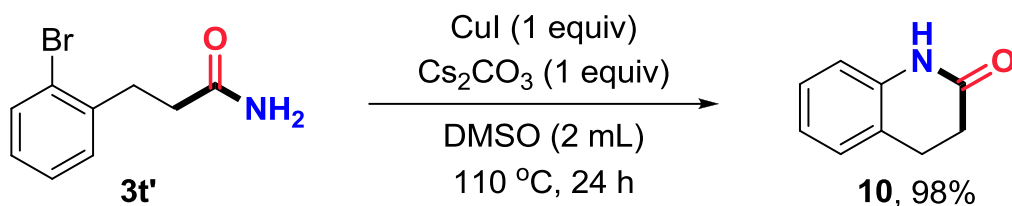

A mixture of 3-(2-bromophenyl)propanamide **3t'** (45.6 mg, 0.2 mmol), CuI (38.0 mg, 0.2 mmol), CsCO<sub>3</sub> (77.2 mg, 0.4 mmol) and DMSO (2.0 mL) was added to a 25 mL flame-dried Young-type tube. The mixture was degassed by the freeze-thaw method and then stirred at 110 °C for 24 hours. After cooling to room temperature, the solvents were evaporated under reduced pressure and the residue was purified by flash column chromatography on silica gel and eluted with petroleum ethers/ethyl acetate (10:1 - 1:1) to afford the desired product **10** as a white solid.

**3,4-dihydroquinolin-2(1H)-one (10):** The title compound was prepared according to

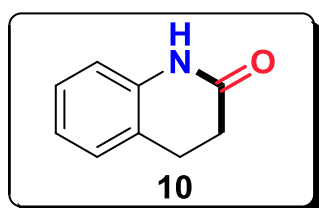

the general procedure and purified by column chromatography to give a white solid, 28.8 mg, 98% yield.

<sup>1</sup>H NMR (400 MHz, CDCl<sub>3</sub>) δ 2.57 (t, *J* = 6.8 Hz, 2H), 2.89 (t, *J* = 6.8 Hz, 2H), 6.77 (d, *J* = 7.2 Hz, 1H), 6.89-6.93 (m, 1H), 7.07-7.11 (m, 2H), 9.25 (br, 1H); <sup>13</sup>C NMR (100 MHz, CDCl<sub>3</sub>) δ 25.3, 30.7, 115.6, 123.1, 123.6, 127.5, 127.9, 137.4, 172.3; HRMS (ESI) calcd. for C<sub>9</sub>H<sub>9</sub>NONa [M+Na]: 170.0576, found: 170.0587.

### 5.2 Synthesis of ibuprofenamide (2u)

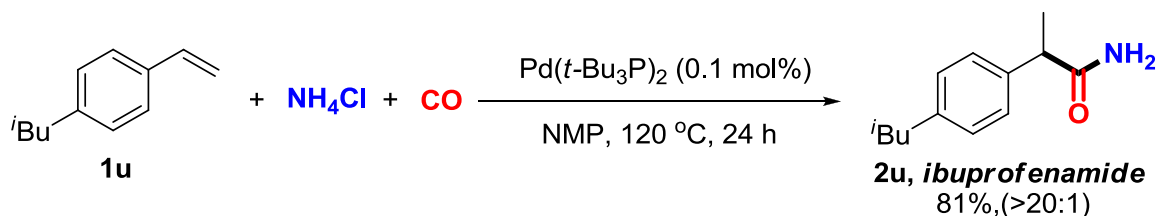

Following our general procedure: In the glove box, a mixture of NH<sub>4</sub>Cl (106.8 mg, 2.0 mmol), Pd(*t*-Bu<sub>3</sub>P)<sub>2</sub> (0.5 mg, 0.001 mmol, 0.1 mol%) and NMP (5.0 mL) was added into a dry glass vessel. The resulting mixture was stirred for 10 minutes at room

temperature and then 1-isobutyl-4-vinylbenzene (**1u**) (160 mg, 1.0 mmol) was added into the reaction mixture. The glass vessel was put into an autoclave and then taken out from the glove box. The autoclave was purged and charged with CO (30 atm). The reaction mixture was stirred at 120 °C for 24 hours. After the reaction finished, the autoclave was cooled to room temperature and the pressure was carefully released in the fume hood. The regioselectivity were measured by GC and GC-MS, respectively. Then the corresponding reaction mixture was purified by flash column chromatography on silica gel and eluted with petroleum ether/ethyl acetate (100/1 - 1/1) to give the desired products **ibuprofenamide (2u)**.

**Ibuprofenamide:** The title compound was prepared according to the above procedure

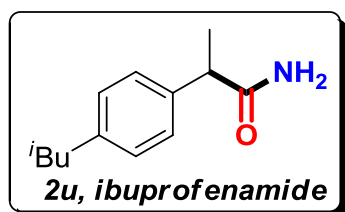

and purified by column chromatography to give a white solid, 165.8 mg, 81% yield. **<sup>1</sup>H NMR** (400 MHz, CDCl<sub>3</sub>) δ 0.88 (d, *J* = 6.8 Hz, 6H), 1.47 (d, *J* = 7.2 Hz, 3H), 1.79 (m, 1H), 2.43 (d, *J* = 7.2 Hz, 2H), 3.53 (q, *J* = 7.2 Hz, 1H), 5.55 (br, 1H), 6.37 (br, 1H), 7.09 (d, *J* = 8.0 Hz, 2H), 7.19 (d, *J* = 8.0 Hz, 2H); **<sup>13</sup>C NMR** (100 MHz, CDCl<sub>3</sub>) δ 18.3, 22.4, 30.2, 31.8, 45.0, 46.2, 127.3, 129.6, 138.5, 140.7, 177.5; **HRMS** (ESI) calcd. for C<sub>13</sub>H<sub>20</sub>NO [M+H]: 206.1539, found: 206.1543.

### 5.3 Synthesis of ibuprofen

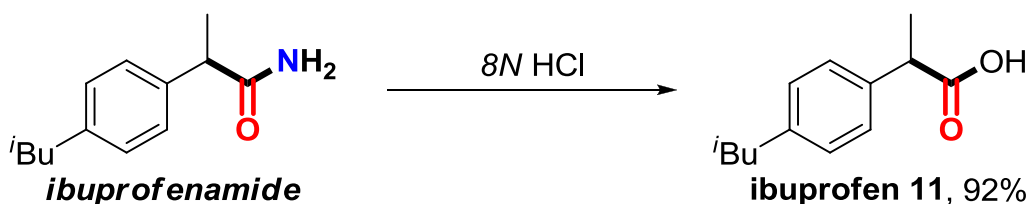

A mixture of ibuprofenamide (**2u**) (41.0 mg, 0.2 mmol), HCl (8N, 2.0 mL) and DCM (1.0 mL) was added to a 25 mL flame-dried Young-type tube. The mixture was degassed by the freeze-thaw method and then stirred at 90 °C for 24 hours. After cooling to room temperature, the reaction mixture was quenched with H<sub>2</sub>O (10.0 mL) and the residue was extracted with DCM (10 mL x 3). The organic layer extract was dried over anhydrous Na<sub>2</sub>SO<sub>4</sub>. Then the solvents were evaporated under reduced pressure and the residue was purified by flash column chromatography on silica gel

and eluted with petroleum ethers/ethyl acetate (50:1 - 10:1) to afford the desired product **ibuprofen (11)**.

**ibuprofen:** The title compound was prepared according to the above procedure and

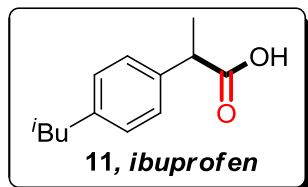

purified by column chromatography to give a white solid, 37.8 mg, 92% yield.  $^1\text{H}$  NMR (400 MHz,  $\text{CDCl}_3$ )  $\delta$  0.81 (d,  $J$  = 6.8 Hz, 6H), 1.40 (d,  $J$  = 7.2 Hz, 3H), 1.73 (m, 1H), 2.35 (d,  $J$  = 7.2 Hz, 2H), 3.59 (q,  $J$  = 7.2 Hz, 1H), 7.01 (d,  $J$  = 8.0 Hz, 2H), 7.13 (d,  $J$  = 8.0 Hz, 2H) 11.05 (br, 1H);  $^{13}\text{C}$  NMR (100 MHz,  $\text{CDCl}_3$ )  $\delta$  18.1, 22.4, 30.2, 45.0, 45.1, 127.3, 129.4, 137.0, 140.9, 181.2. HRMS (ESI) calcd. for  $\text{C}_{13}\text{H}_{18}\text{O}_2\text{Na}$  [ $\text{M}+\text{Na}$ ]: 229.1199, found: 229.1195.

#### 5.4 Synthesis of 2-(4-isobutylphenyl)propan-1-aminium chloride

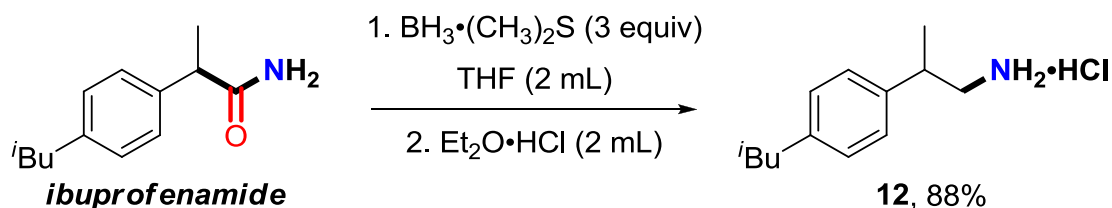

A mixture of ibuprofenamide (**2u**) (102.5 mg, 0.5 mmol), THF (2.0 mL) and  $\text{BH}_3\cdot(\text{CH}_3)_2\text{S}$  (1.5 mmol, 0.75 mL) was added to a 25 mL flame-dried Young-type tube and stirred at 50 °C for 24 hours. After cooling to room temperature, the mixture was quenched with  $\text{CH}_3\text{OH}$  (1.0 mL) at 0 °C. Then the residue was extracted with DCM (10 mL x 3) and  $\text{Et}_2\text{O}\cdot\text{HCl}$  (2M, 2 mL) was added into the mixture. The solvent was removed under reduced pressure and concentrated under reduced pressure to afford the desired product **2-(4-isobutylphenyl)propan-1-aminium chloride (12)**

**2-(4-isobutylphenyl)propan-1-aminium chloride (12):** The title compound was

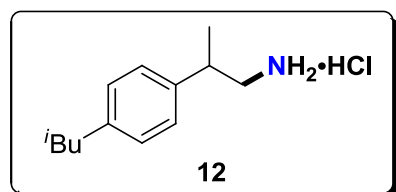

prepared according to the above procedure and afforded the white solid, 100.5 mg, 88% yield.  $^1\text{H}$  NMR (400 MHz,  $\text{D}_2\text{O}$ )  $\delta$  0.75-0.77 (m, 6H), 1.21 (d,  $J$  = 7.2 Hz, 3H), 1.70 (m, 1H), 2.35 (d,  $J$  = 7.2 Hz, 2H), 3.00-3.16 (m, 3H), 7.10 (d,  $J$  = 8.0 Hz, 2H), 7.17 (d,  $J$  = 8.0 Hz, 2H);  $^{13}\text{C}$  NMR (100 MHz,  $\text{D}_2\text{O}$ )  $\delta$  18.6, 21.7, 29.7, 37.3, 44.3, 45.7, 127.1, 129.8, 139.3, 141.2.

**HRMS** (ESI) calcd. for C<sub>13</sub>H<sub>22</sub>N [M+H]: 192.1747, found: 192.1750.

### 5.5 Synthesis of 2-(4-isobutylphenyl)propanenitrile

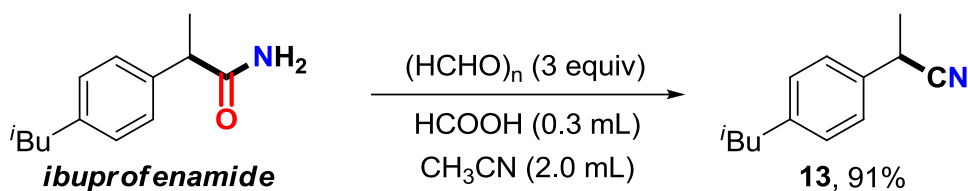

A mixture of ibuprofenamide (**2u**) (102.5 mg, 0.5 mmol), (HCHO)<sub>n</sub> (75.0 mg, 1.5 mmol), HCOOH (0.3 mL) and CH<sub>3</sub>CN (2.0 mL) was added to a 25 mL flame-dried Young-type tube. The mixture was degassed by the freeze-thaw method and then stirred at 85 °C for 24 hours. After cooling to room temperature, the solvents were evaporated under reduced pressure and the residue was purified by flash column chromatography on silica gel and eluted with petroleum ethers/ethyl acetate (50:1 - 10:1) to afford the desired product **2-(4-isobutylphenyl)propanenitrile (13)**.

**2-(4-isobutylphenyl)propanenitrile (13):** The title compound was prepared according

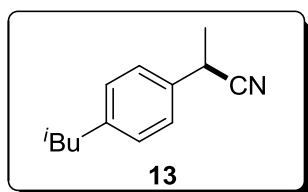

to the above procedure and purified by column chromatography to give the colorless liquid, 85.2 mg, 91% yield. <sup>1</sup>H NMR (400 MHz, CDCl<sub>3</sub>) δ 0.82 (s, 3H), 0.83 (s, 3H), 1.55 (d, *J* = 7.2 Hz, 3H), 1.73-1.83 (m, 1H), 2.39 (d, *J* = 7.2 Hz, 2H), 3.77 (q, *J* = 7.2 Hz, 1H), 7.07 (d, *J* = 8.0 Hz, 2H), 7.17 (d, *J* = 8.0 Hz, 2H); <sup>13</sup>C NMR (100 MHz, CDCl<sub>3</sub>) δ 21.4, 22.3, 30.2, 30.9, 45.0, 121.8, 126.4, 129.8, 134.3, 141.7. **HRMS** (ESI) calcd. for C<sub>13</sub>H<sub>17</sub>NNa [M+Na]: 210.1253, found: 210.1246.

### 5.6 Synthesis of propionamide (TON experiment)

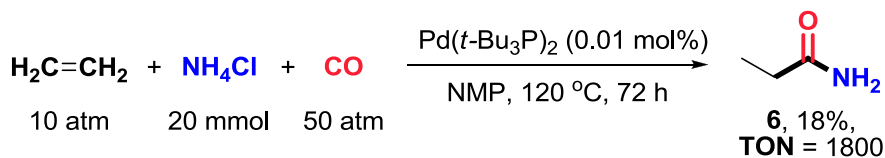

A mixture of NH<sub>4</sub>Cl (1.068 g, 20.0 mmol), Pd(*t*-Bu<sub>3</sub>P)<sub>2</sub> (0.002 mmol, 0.01 mol%) and NMP (30 mL) was added into a glass tube which was placed in an autoclave (350 mL). Then the autoclave was purged and charged with ethylene (10 atm) and CO (50 atm). The reaction mixture was stirred at 120 °C for 72 hours. After the reaction finished, the autoclave was cooled to room temperature and the pressure was carefully released in the fume hood. The yield was determined by GC using *n*-Cetane as the

internal standard (18%, TON = 1800).

### 5.7 Synthesis of 2-(4-isobutylphenyl)propanenitrile

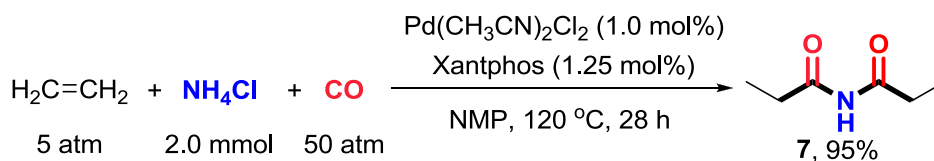

A mixture of  $\text{NH}_4\text{Cl}$  (106.8 mg, 2.0 mmol),  $\text{Pd}(\text{CH}_3\text{CN})_2\text{Cl}_2$  (5.2 mg, 0.02 mmol, 1 mol%), Xantphos (14.5 mg, 0.025 mmol, 1.25 mol%) and NMP (5.0 mL) was added into a dry glass tube which was placed in an autoclave. Then the autoclave was purged and charged with ethylene (5 atm) and CO (50 atm). The reaction mixture was stirred at 120 °C for 28 hours. After the reaction finished, the autoclave was cooled to room temperature and the pressure was carefully released in the fume hood. Then the corresponding reaction mixture was purified by flash column chromatography on silica gel column and eluted with petroleum ether/ethyl acetate (100/1 – 1/1) to give the desired product **N-propionylpropionamide (7)**.

**N-propionylpropionamide (7):** The title compound was prepared according to the

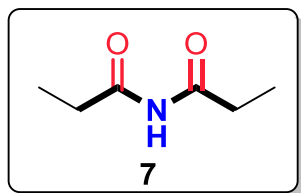

above procedure and purified by column chromatography to give a white solid, 243.1 mg, 95% yield.  $^1\text{H NMR}$  (400 MHz,  $\text{CDCl}_3$ )  $\delta$  1.16 (t,  $J = 7.2$  Hz, 6H), 2.62 (q,  $J = 7.2$  Hz, 4H), 9.08 (br, 1H);  $^{13}\text{C NMR}$  (100 MHz,  $\text{CDCl}_3$ )  $\delta$  8.4, 30.7,

175.4; **HRMS** (ESI) calcd. for  $\text{C}_6\text{H}_{11}\text{NONa}$   $[\text{M}+\text{Na}]$ : 152.0682, found: 152.0686.

## 6. Mechanistic studies

### 6.1 NMR studies for monitoring the $\text{HPdCl}(t\text{-Bu}_3\text{P})_2$

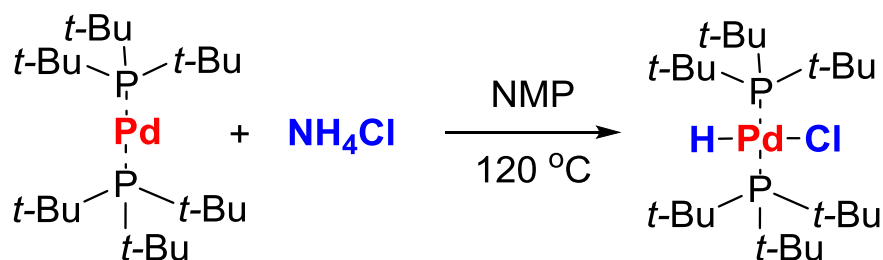

In the glove box, a mixture of  $\text{NH}_4\text{Cl}$  (10.7 mg, 0.2 mmol),  $\text{Pd}(t\text{-Bu}_3\text{P})_2$  (51.0 mg, 0.1 mmol) and NMP (0.6 mL) was added into a J-Young-type NMR tube (containing 0.1 mL  $\text{DMF-}d_7$ ). The mixture was stirred at  $120^\circ\text{C}$  for designed time and the mixture was characterized by  $^1\text{H}$  NMR and  $^{31}\text{P}$  NMR (Figure S4 and S5).

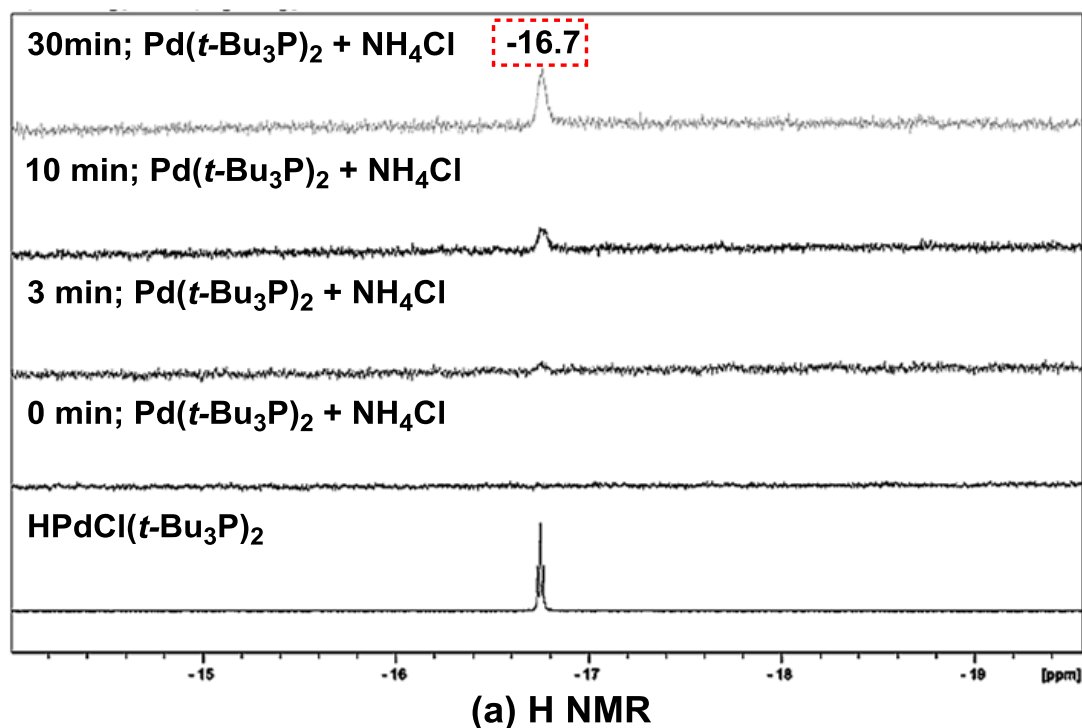

Figure S4.  $^1\text{H}$  NMR spectra of the reaction mixture as the time goes on



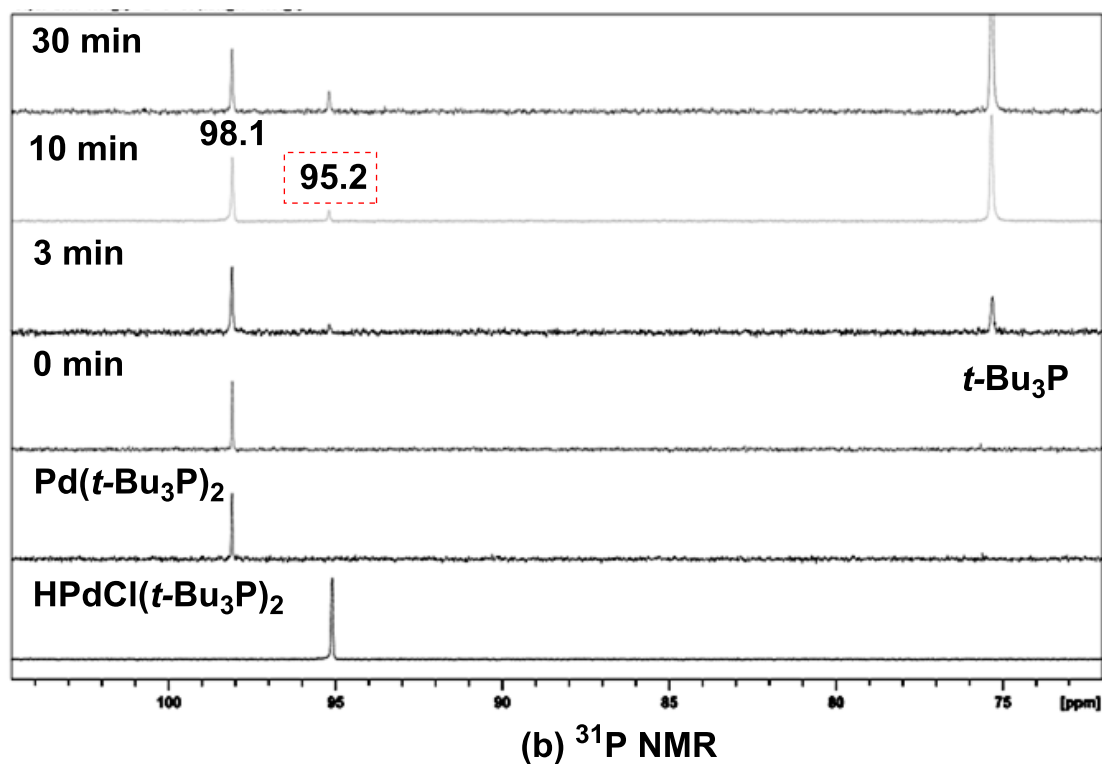

Figure S5.  $^{31}\text{P}$  NMR spectra of the reaction mixture as the time goes on

## 6.2 NMR studies for monitoring the complex A

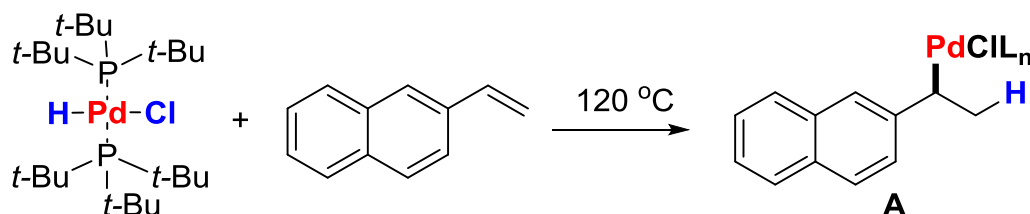

In the glove box, a mixture of 2-vinylnaphthalene (3.1 mg, 0.022 mmol),  $\text{HPdCl}(t\text{-Bu}_3\text{P})_2^4$  (10.2 mg, 0.02 mmol) and  $\text{DMF-}d_7$  (0.6 mL) was added into a J-Young-type NMR tube. The mixture was stirred at 120  $^{\circ}\text{C}$  for designed time and the mixture was characterized by  $^1\text{H}$  NMR and  $^{31}\text{P}$  NMR (Figure S6 and S7).

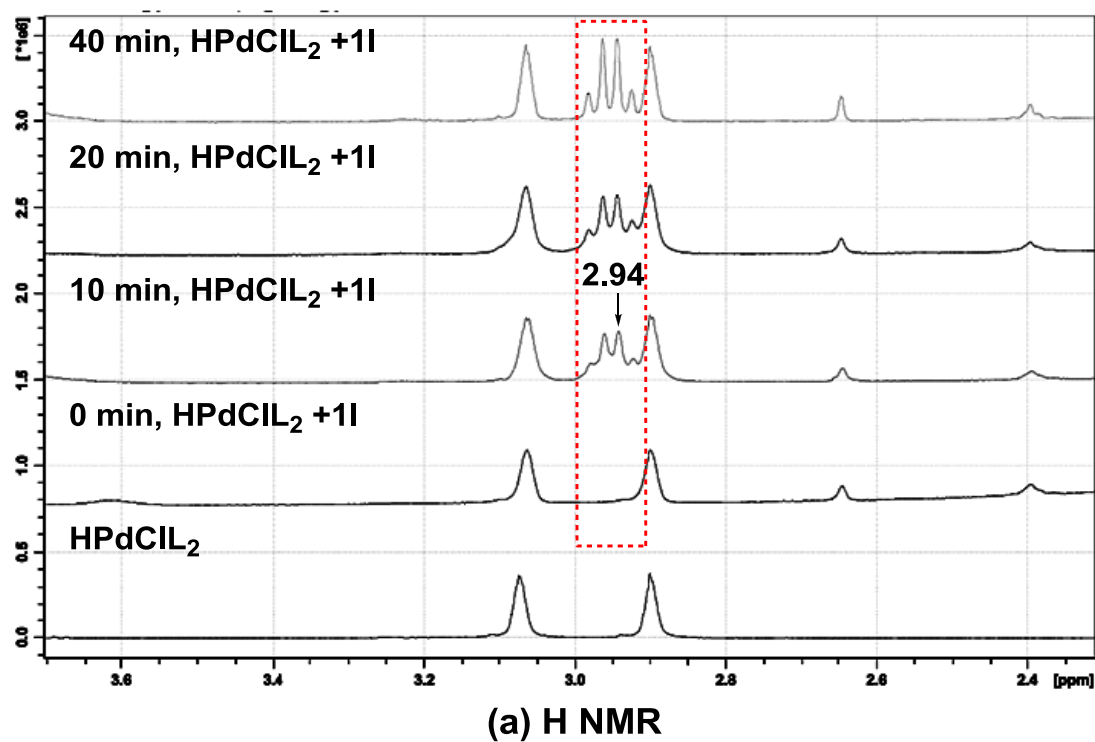

Figure S6.  $^1\text{H}$  NMR spectra of the reaction mixture as the time goes on

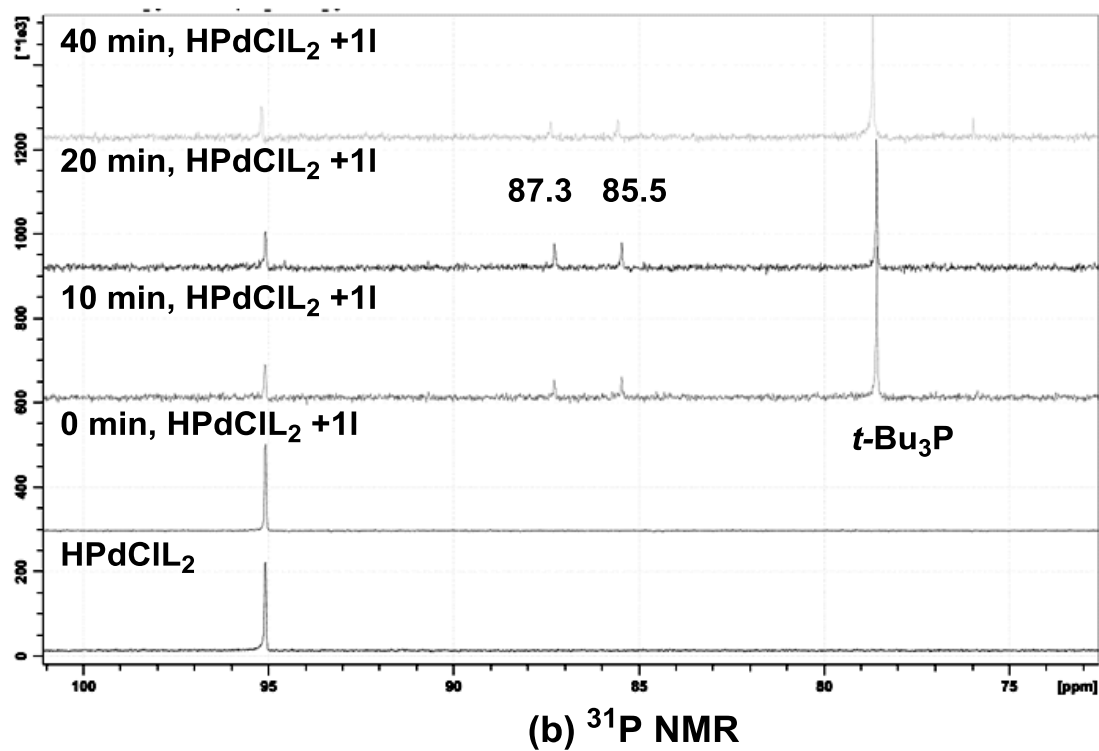

Figure S7.  $^{31}\text{P}$  NMR spectra of the reaction mixture as the time goes on

### 6.3 $^{15}\text{N}$ -Labeled experiments: $^{15}\text{NH}_4\text{Cl}$

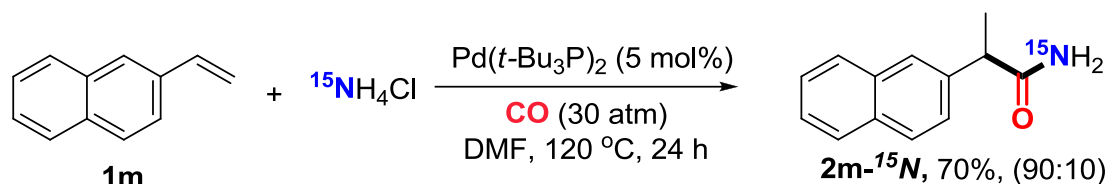

Following our general procedure: In the glove box, a mixture of 2-vinylnaphthalene (**1m**) (154.0 mg, 1.0 mmol),  $^{15}\text{NH}_4\text{Cl}$  (108.8 mg, 2.0 mmol),  $\text{Pd}(t\text{-Bu}_3\text{P})_2$  (25.5 mg, 0.05 mmol, 5 mol%) and NMP (5.0 mL) was added into a dry glass vessel. The resulting mixture was stirred for 10 minutes at room temperature and then 2-vinylnaphthalene (**1m**) (154.0 mg, 1.0 mmol) was added into the reaction mixture. The glass vessel was put into an autoclave and then taken out from the glove box. The autoclave was purged and charged with CO (30 atm). The reaction mixture was stirred at 120 °C for 24 hours. After the reaction finished, the autoclave was cooled to room temperature and the pressure was carefully released in the fume hood. The regioselectivity was measured by GC and GC-MS, respectively. Then the corresponding reaction mixture was purified by flash column chromatography on silica gel and eluted with petroleum ether/ethyl acetate (100/1 - 1/1) to give the desired product **2m- $^{15}\text{N}$**  (140.2 mg, 70% yield).

**2-(naphthalen-2-yl)propanamide (2m- $^{15}\text{N}$ ):** The title compound was prepared

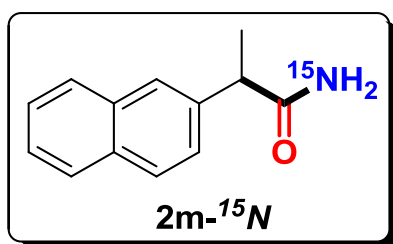

according to the general procedure and purified by column chromatography to give a white solid, 140.2 mg, 70% yield.  $^1\text{H}$  NMR (400 MHz,  $\text{CDCl}_3$ )  $\delta$  1.60 (d,  $J = 7.2$  Hz, 3H), 3.73 (q,  $J = 7.2$  Hz, 1H), 5.28 (br, 0.5H), 5.50 (br, 0.5H), 5.63 (br, 0.5H), 5.85 (br,

0.5H), 7.41-7.51 (m, 3H), 7.75-7.84 (m, 4H);  $^{13}\text{C}$  NMR (100 MHz,  $\text{CDCl}_3$ )  $\delta$  18.3, 46.7, 46.8, 125.7, 126.0, 126.3, 126.4, 127.7, 127.7, 128.8, 132.6, 133.5, 138.7, 176.5, 176.7; HRMS (ESI) calcd. for  $\text{C}_{13}\text{H}_{13}^{15}\text{NONa}$  [ $\text{M}+\text{Na}$ ]: 223.0860, found: 223.0859.

#### 6.4 Labeling experiments: 2-vinylnaphthalene (**1m-d<sub>2</sub>**)

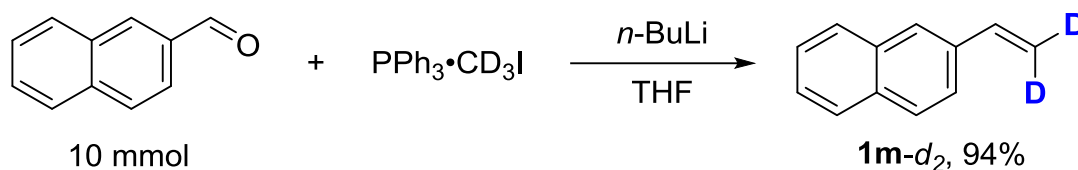

To the solution of  $\text{PPh}_3 \cdot \text{CD}_3\text{I}$  (4.86 g, 12.0 mmol) in 30 mL of dry THF, *n*-Butyl lithium (4.8 mL of 2.5 M in hexane, 12 mmol,) was added dropwise at room temperature under nitrogen. After stirring for 30 minutes, 2-naphthaldehyde (1.5 g, 10.2 mmol) was added into the reaction mixture. Then the reaction mixture was stirred for another 17 hours at the room temperature under nitrogen. After the mixture was quenched with 1.0 mL of  $\text{H}_2\text{O}$  at the 0 °C, the reaction mixture was diluted with 20 mL of ethyl acetate and washed with 20 mL of brine. The organic layer was dried with anhydrous  $\text{Na}_2\text{SO}_4$  and concentrated under vacuum. The crude residue was purified by flash column chromatography on silica gel (ethyl acetate/petroleum ether = 1/100 ~ 1/50) to afford the desired product **1m-d<sub>2</sub>** as a white solid (1.5 g, 94%).  $^1\text{H}$  NMR (400 MHz,  $\text{CDCl}_3$ )  $\delta$  5.31-5.33 (m, 0.06H), 5.84-5.88 (m, 0.06H), 6.87 (s, 1H), 7.42-7.48 (m, 2H), 7.62-7.65 (m, 1H), 7.75 (s, 1H), 7.78-7.81 (m, 3H);  $^{13}\text{C}$  NMR (100 MHz,  $\text{CDCl}_3$ ) 123.2, 125.9, 126.2, 126.4, 127.7, 128.1, 128.2, 133.2, 133.6, 135.0, 136.8.

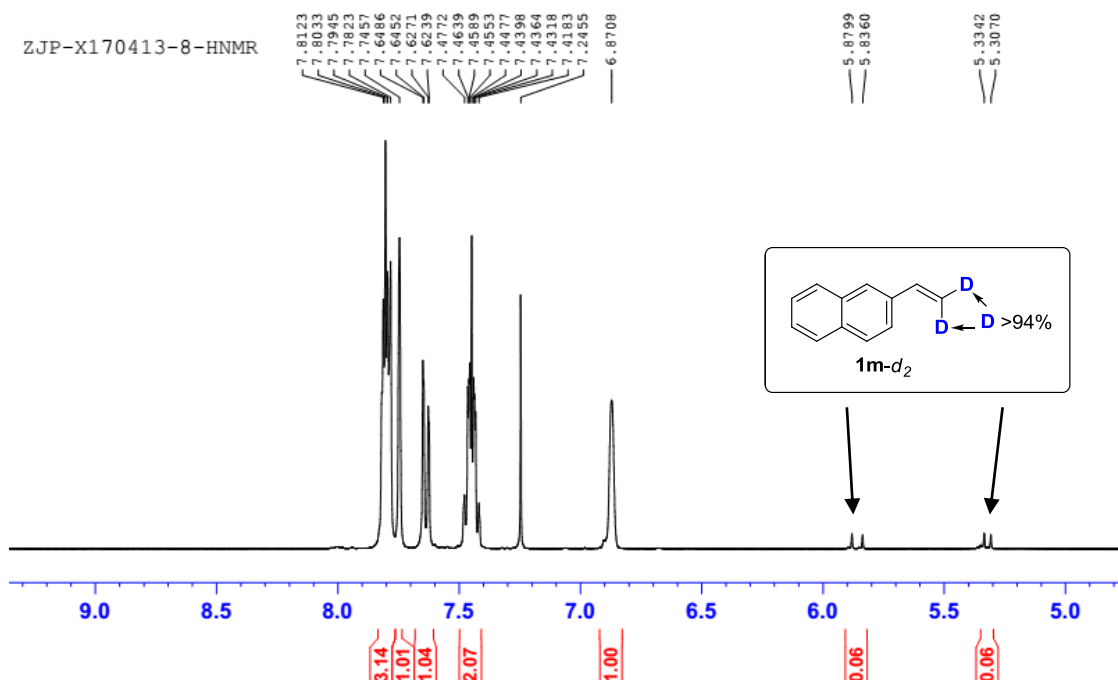

Figure S8.  $^1\text{H}$  NMR spectra of **2m-d**

### 6.5 Labeling experiments: 2-vinylnaphthalene (**1m-d<sub>2</sub>**)

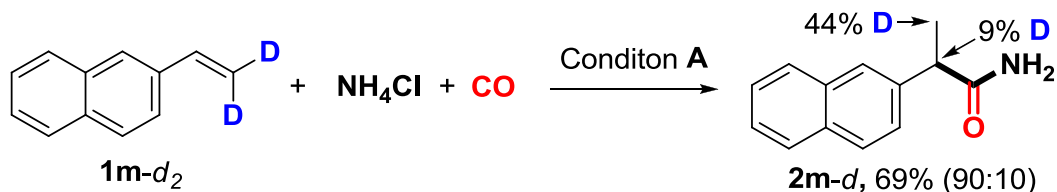

Following our general procedure: In the glove box, a mixture of 2-vinylnaphthalene (**1m-d<sub>2</sub>**) (156.0 mg, 1.0 mmol),  $\text{NH}_4\text{Cl}$  (106.8 mg, 2.0 mmol),  $\text{Pd}(t\text{-Bu}_3\text{P})_2$  (25.5 mg, 0.05 mmol, 5 mol%) and NMP (5.0 mL) was added into a glass vessel. The resulting mixture was stirred for 10 minutes at room temperature and then 2-vinylnaphthalene (**1m-d<sub>2</sub>**) (156.0 mg, 1.0 mmol) was added into the reaction mixture. The glass vessel was put into an autoclave and then taken out from the glove box. The autoclave was purged and charged with CO (30 atm). The reaction mixture was stirred at 120 °C for 24 hours. After the reaction finished, the autoclave was cooled to room temperature and the pressure was carefully released in the fume hood. The regioselectivity were measured by GC and GC-MS, respectively. Then the mixture was purified by flash column chromatography on silica gel and eluted with petroleum ether/ethyl acetate (100/1 - 1/1) to give the desired product **2m-d** (137.4 mg, 69%

yield).

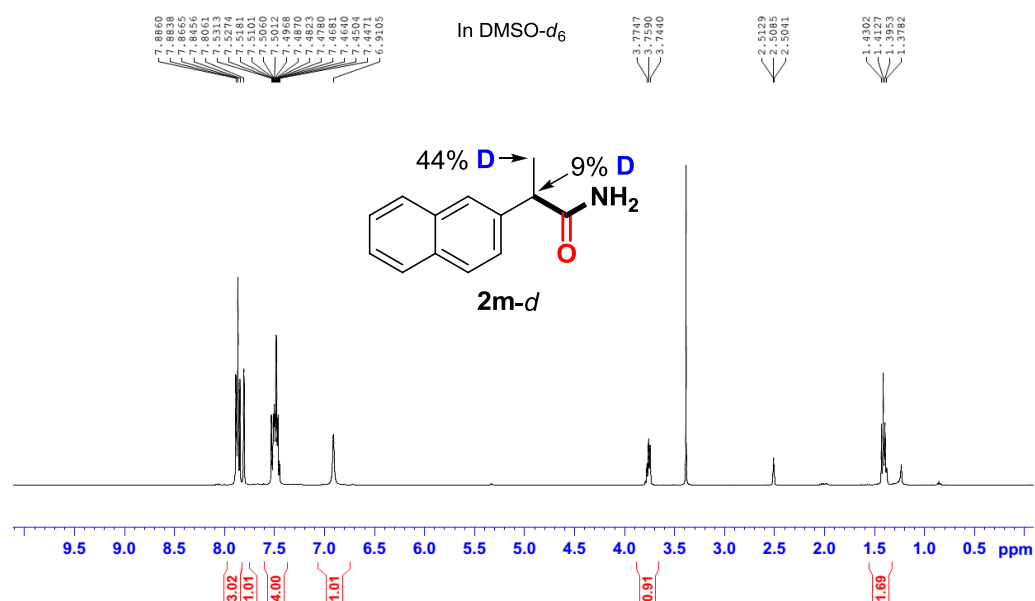

Figure S9. <sup>1</sup>H NMR spectra of **2m-d**

## 6.6 Labeling experiments: 2-vinylnaphthalene (**1m-d<sub>2</sub>**)

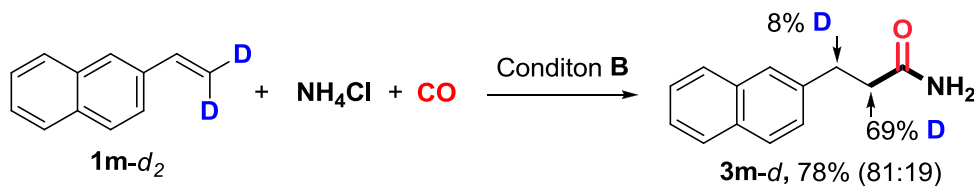

Following our general procedure: In the glove box, a mixture of  $\text{NH}_4\text{Cl}$  (106.8 mg, 2.0 mmol),  $\text{PdI}_2$  (7.2 mg, 0.02 mmol), Xantphos (14.6 mg, 0.025 mmol) and NMP (3.0 mL) was added into a dry glass vessel. The resulting mixture was stirred for 10 minutes at room temperature and then 2-vinylnaphthalene (**1m-d<sub>2</sub>**) (156.0 mg, 1.0 mmol) was added into the reaction mixture. The glass vessel was put into an autoclave and then taken out from the glove box. The autoclave was purged and charged with CO (30 atm). The reaction mixture was stirred at 120 °C for 4 hours. After the reaction finished, the autoclave was cooled to room temperature and the pressure was carefully released in the fume hood. The regioselectivity was measured by GC and GC-MS, respectively. Then the corresponding reaction mixture was purified by flash column chromatography on silica gel and eluted with petroleum ether/ethyl acetate (100/1 - 1/1) to give the desired product **3m-d** (154.3 mg, 78% yield, L:B = 81:19).

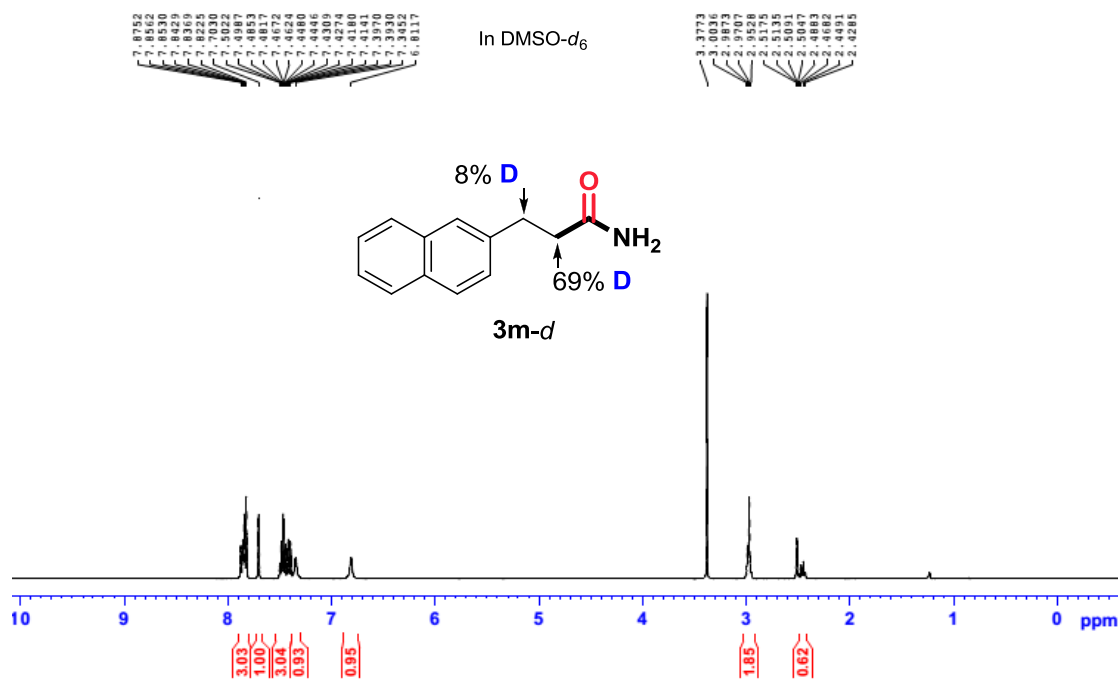

**Figure S10.** <sup>1</sup>H NMR spectra of **3m-d**

## 6.7 Gram-scale experiments

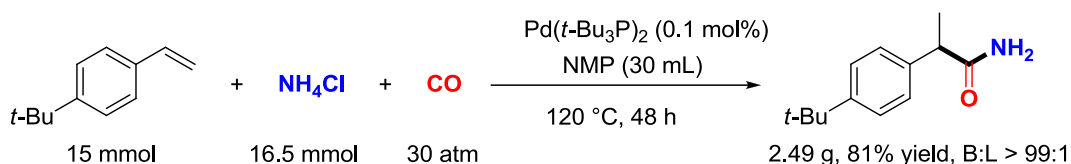

In a glove box, a mixture of NH<sub>4</sub>X (0.88 g, 16.5 mmol), Pd(*t*-Bu<sub>3</sub>P)<sub>2</sub> (7.7 mg, 0.015 mmol) and NMP (30 mL) was added into a round-bottomed flask. The resulting mixture was stirred for 10 minutes at room temperature and then 4-*tert*-butylstyrene (2.4 g, 15 mmol) was added into the reaction mixture. The flask was put into an autoclave and then taken out from the glove box. The autoclave was purged and charged with CO (30 atm). The reaction mixture was stirred at 120 °C for 48 hours. After the reaction finished, the autoclave was cooled to room temperature and the pressure was carefully released in the fume hood, and then the corresponding reaction mixture was purified by flash column chromatography on silica gel and eluted with petroleum ether/ethyl acetate (100/1 - 1/1) to give the desired product 2.29 g, 81% yield (B:L>99:1).

## 6.8 The experiments for investigate the fate of HCl released from the reaction

To investigate the fate of the produced HCl, a series of control experiments have been conducted. We assumed that there are three possible existential states for the produced HCl may exist:

**(1) To investigate whether it existed as a gas in the reaction system:**

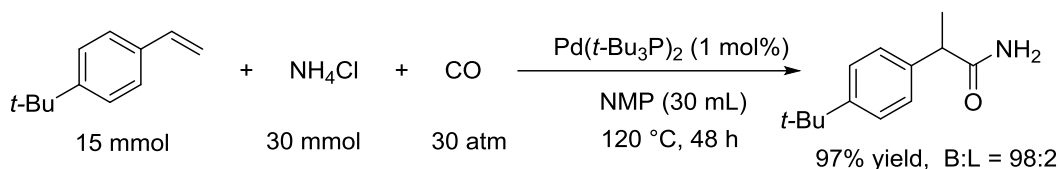

We use the above reaction as the model reaction which was conducted in a large scale (15 mmol). Once the reaction was finished, the remaining gas was carefully released from the autoclave and absorbed by deionized water either at 120 °C or cooling down to room temperature. The resulting solution was titrated by NaOH (0.1 mol/L NaOH standard solution) to test the acidity and AgNO<sub>3</sub> (0.1 mol/L standard solution) to test the concentration of Cl<sup>-</sup>. The results demonstrated that no HCl was found in the resulting solution, which indicated that HCl did not exist as HCl-gas in the reaction system.

**(2) To investigate whether it convert to HCOCl**

After the reaction finished and released the remaining gas, we brought the autoclave to the glovebox. After opening the autoclave in the glovebox, benzyl alcohol (30 mmol), Et<sub>3</sub>N (90 mmol) and CH<sub>2</sub>Cl<sub>2</sub> (100 mL) were introduced into the reaction mixture. The resulting mixture was stirred at room temperature for 30 minutes and then examined by GC-MS. The GC-MS analysis demonstrated that no benzyl formate was detected. These results suggested that HCOCl was not formed in the reaction system.

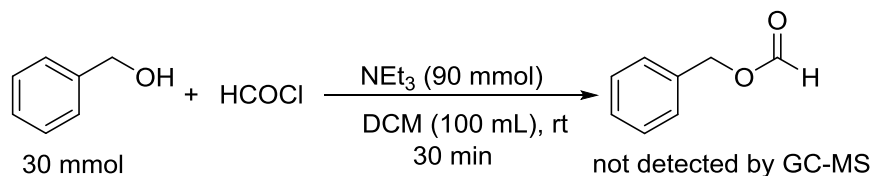

**(3) To investigate whether it bound to NMP.**



After the reaction finished and released the remaining gas, the resulting reaction mixture was poured into deionized water (100 mL), and the resulting reaction mixture was stirred at room temperature for 30 minutes. The desired amide was precipitated from the reaction mixture. The mixture was filtrated, washed with deionized water. The resulting filtrate (200 mL) was collected and titrated with AgNO<sub>3</sub> (0.1 mol/L) to exam the content of Cl<sup>-</sup>. The titration was repeated for three times and the results demonstrated that the total Cl<sup>-</sup> is 29.7 mmol (very close to 30 mmol, the amount of HCl= 29.7 mmol-15 mmol = 14.7 mmol (0.0735 mol/L)). The pH of the filtrate solution was 2.20 (which was tested by pH meter). These results suggested that the released HCl was indeed existed in the reaction solvent, but it was not existed as free-state (the pH value of these dissociative HCl (0.0735 mol/L) should be 1.13).

**Table S7. The pK<sub>a</sub> value for different hydrochloride salts <sup>a</sup>**

| Structure                                                                           | Solvent          | pK <sub>a</sub> | Method |
|-------------------------------------------------------------------------------------|------------------|-----------------|--------|
| 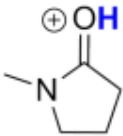 | H <sub>2</sub> O | -0.72           | SM     |
|  | H <sub>2</sub> O | -0.86           | NMR    |
|  | H <sub>2</sub> O | 9.27            | PTM    |

We have checked the pK<sub>a</sub> of protonated NMP, primary amide and NH<sub>4</sub><sup>+</sup> (*J. Chem. Soc., Perkin Trans. 2*, **1991**, 373-376; *J. Chem. Soc., Perkin Trans. 2*, **1993**, 1091-1098; *J. Am. Chem. Soc.*, **1957**, 79, 796–800), which has been shown in the Table S7. Comparing the corresponding pK<sub>a</sub> of these compounds, we thought that the HCl was most likely bounded to NMP to form the N-methyl-2-pyrrolidone hydrochloride.

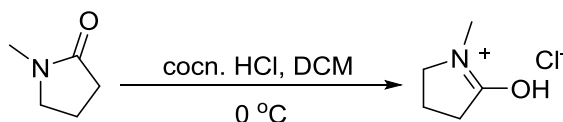

We have also synthesized the N-methyl-2-pyrrolidone hydrochloride according to the reported method (Sebastian Herler; Peter Mayer; Axel Schulz; Alexander Villinger. *Acta Cryst.* **2007**, *E63*, o3991). The  $\text{Pd}(t\text{-Bu}_3\text{P})_2$  was treated with N-methyl-2-pyrrolidone hydrochloride at room temperature in  $\text{DMSO-}d_6$  and monitored by NMR. After 12 hours, the signal at  $\delta = -16.77$  (t) (which was assigned as  $\text{HPd}(t\text{-Bu}_3\text{P})_2\text{Cl}$ ) was observed by  $^1\text{H}$ -NMR, indicating that N-methyl-2-pyrrolidone hydrochloride could react with  $\text{Pd}(0)$  to form  $\text{HPdCl}$  species.

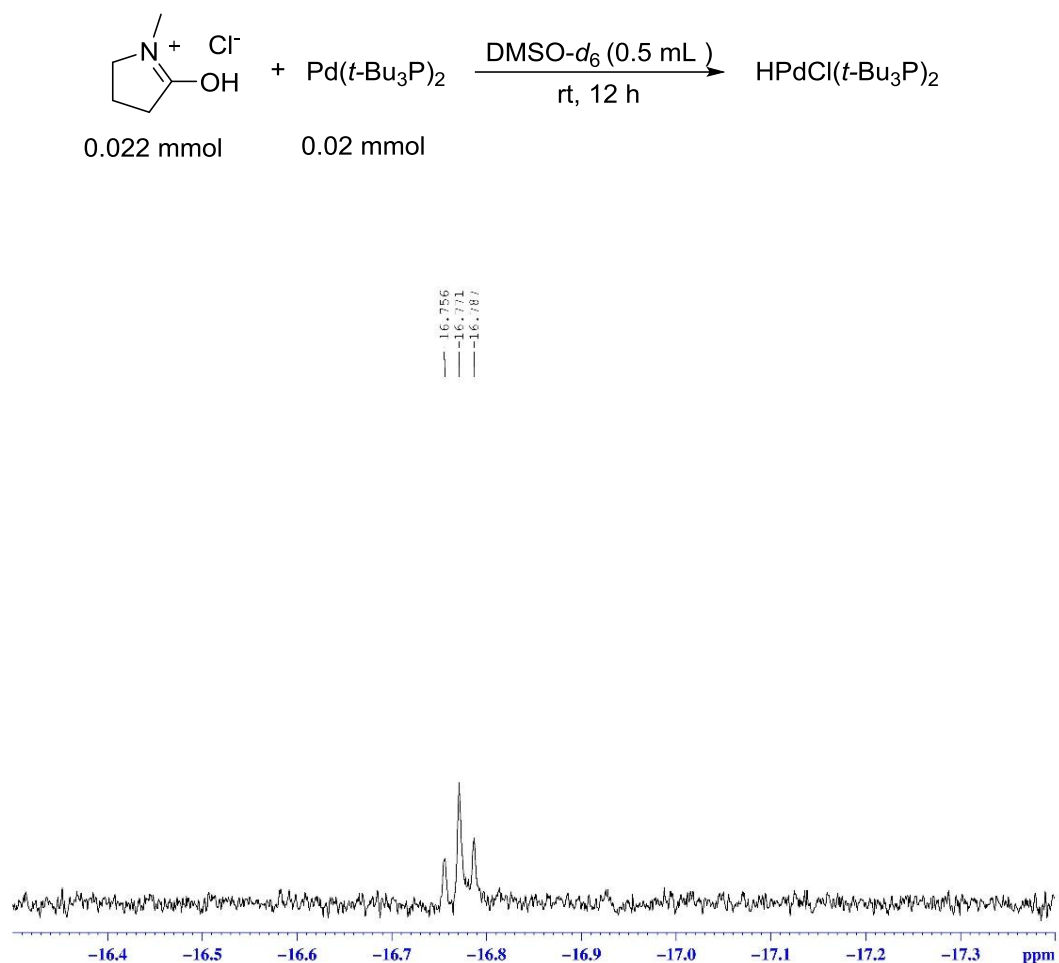

**Figure S11.**  $^1\text{H}$  NMR spectra of  $\text{HPdCl}(t\text{-Bu}_3\text{P})_2$

The above experiments suggested that the  $\text{HCl}$  released from  $\text{NH}_4\text{Cl}$  was most likely captured by NMP to drive the reaction.

## 6.9 The experiments of acyl palladium complex

### 6.9.1 The catalytic reaction of $\text{HPd}(t\text{-Bu}_3\text{P})_2\text{Cl}$ with **1a**

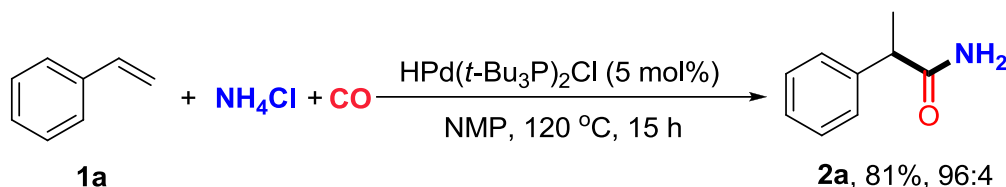

In a glove box, a mixture of  $\text{NH}_4\text{Cl}$  (106.8 mg, 2.0 mmol),  $\text{HPd}(t\text{-Bu}_3\text{P})_2\text{Cl}$  (27.3 mg, 0.05 mmol)<sup>4</sup> and NMP (5.0 mL) was added into a dry glass vessel. The resulting mixture was stirred for 10 minutes at room temperature and then styrene (114  $\mu\text{L}$ , 1.0 mmol) was added into the reaction mixture. The glass vessel was put into an autoclave and then taken out from the glove box. The autoclave was purged and charged with CO (30 atm). The reaction mixture was stirred at 120  $^\circ\text{C}$  for 15 hours. After the reaction finished, the autoclave was cooled to room temperature and the pressure was carefully released in the fume hood. The regioselectivity was measured by GC and GC-MS, respectively. Then the corresponding reaction mixture was purified by flash column chromatography on silica gel and eluted with petroleum ether/ethyl acetate (100/1 - 1/1) to give the desired products **2a** (120.9 mg, 81% yield, B:L = 96:4).

### 6.9.2 The reaction of 3-phenylpropionyl chloride and $\text{NH}_4\text{Cl}$

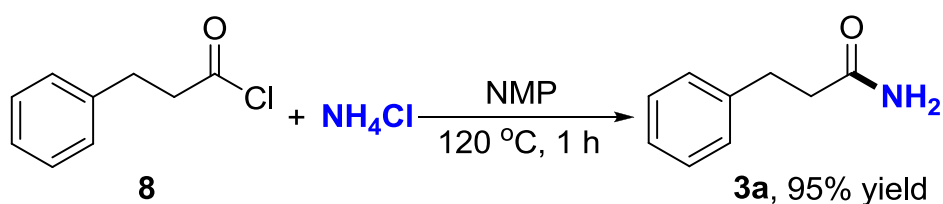

In a glove box, a mixture of 3-phenylpropionyl chloride (148.5  $\mu\text{L}$ , 1.0 mmol),  $\text{NH}_4\text{Cl}$  (107 mg, 2.0 mmol), NMP (5 mL) were added to a 25 mL flame-dried Young-type tube. The tube was taken out from glove box and stirred at 120  $^\circ\text{C}$  for 1 hours. After the reaction finished, the corresponding reaction mixture was purified by flash column chromatography on silica gel and eluted with petroleum ether/ethyl acetate (100/1 - 1/1) to give the desired product **3a** (142 mg, 95% yield).

### 6.9.3 Synthesis of palladium complex $[\text{PhCH}_2\text{CH}_2\text{COPd}(t\text{-Bu}_3\text{P})\text{Cl}]^5$

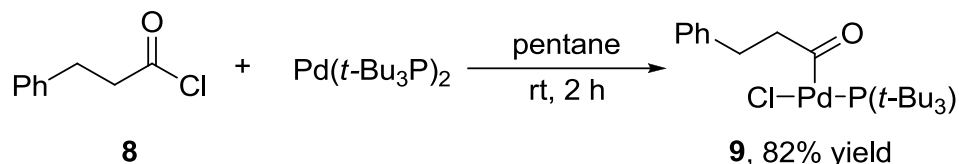

In a glove box, a mixture of Pd(*t*-Bu<sub>3</sub>P)<sub>2</sub> (511 mg, 1.0 mmol), 3-phenylpropionyl chloride (297 uL, 2.0 mmol) and pentane (15 mL) was added to a 25 mL flame-dried Schlenk flask. The yellow homogeneous mixture is allowed to stand, precipitating a yellow solid after 15 minutes. After 2 hours, the yellow solid is filtered and washed with pentane (3 × 5 mL) to afford the pure complex **9** (390 mg, 82% yield). <sup>1</sup>H NMR (400 MHz, C<sub>6</sub>D<sub>6</sub>) δ 0.99 (d, *J* = 12.8 Hz, 27H), 2.90 (t, *J* = 7.6 Hz, 2H), 3.72 (t, *J* = 7.6 Hz, 2H), 6.98-7.08 (m, 5H); <sup>31</sup>P NMR (162 MHz, C<sub>6</sub>D<sub>6</sub>) 73.98; <sup>13</sup>C NMR (100 MHz, CDCl<sub>3</sub>) 30.6, 32.1 (32.1), 39.2 (d, *J* = 16.2 Hz), 55.7 (d, *J* = 32.4 Hz), 126.5, 128.6, 128.8, 139.7, 203.5.

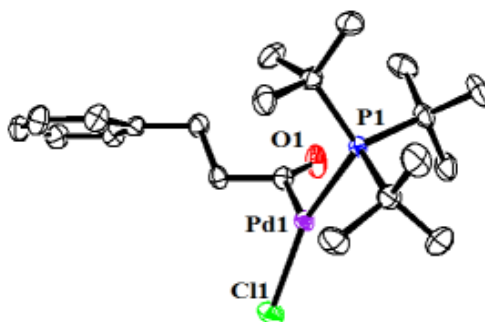

**Figure S12.** ORTEP drawing of palladium complex **9**

#### 6.9.4 Stoichiometric reaction of palladium complex **9** and NH<sub>4</sub>Cl

**In the absence of CO:**

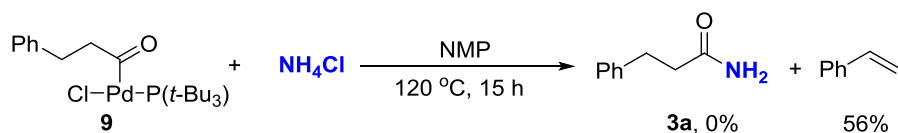

In a glove box, a mixture of [PhCH<sub>2</sub>CH<sub>2</sub>COPd(*t*-Bu<sub>3</sub>P)Cl] **9** (47.6 mg, 0.1 mmol), NH<sub>4</sub>Cl (10.7 mg, 0.2 mmol) and NMP (1 mL) were added to a 25 mL flame-dried Young-type tube. The tube was taken out from glove box and stirred at 120 °C for 15 hours. The tube was cooled to room temperature and the reaction mixture was

examined by GC and GC-MS and showed that no desired product **3a** was produced, however, 56% styrene could be detected by GC and GC-MS using *n*-cetane as the internal standard.

#### In the presence of CO:

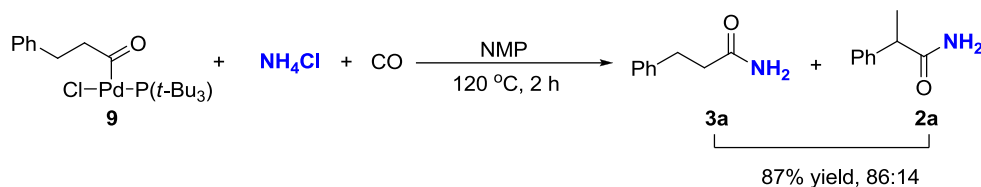

In a glove box, a mixture of [PhCH<sub>2</sub>CH<sub>2</sub>COPd(*t*-Bu<sub>3</sub>P)Cl] **9** (47.6 mg, 0.1 mmol), NH<sub>4</sub>Cl (10.7 mg, 0.2 mmol) and NMP (1 mL) was added into a dry glass vessel. The glass vessel was put into an autoclave and then taken out from the glove box. The autoclave was purged and charged with CO (30 atm). The reaction mixture was stirred at 120 °C for 2 hour. The autoclave was cooled to room temperature and the pressure was carefully released in the fume hood. The regioselectivity and the yield was measured by GC and GC-MS using *n*-cetane as the internal standard. The desired amides were obtained in 87% yield with L:B = 86:14.

#### 6.9.5 The catalytic reaction of complex **9** with 4-methoxystyrene

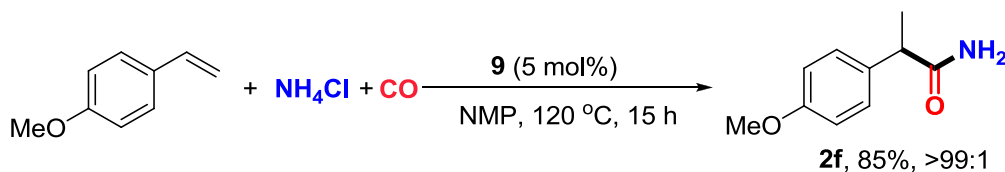

In a glove box, a mixture of NH<sub>4</sub>Cl (106.8 mg, 2.0 mmol), [PhCH<sub>2</sub>CH<sub>2</sub>COPd(*t*-Bu<sub>3</sub>P)Cl] **9** (23.8 mg, 0.05 mmol) and NMP (5.0 mL) was added into a dry glass vessel. The resulting mixture was stirred at room temperature for 10 minutes and then 4-methoxystyrene (134 mg, 1.0 mmol) was added into the reaction mixture. The glass vessel was put into an autoclave and then taken out from the glove box. The autoclave was purged and charged with CO (30 atm). The reaction mixture was stirred at 120 °C for 15 hours. After the reaction finished, the autoclave was cooled to room temperature and the pressure was carefully released in the fume hood. The regioselectivity was measured by GC and GC-MS, respectively. Then the corresponding reaction mixture was purified by flash column chromatography on silica

gel and eluted with petroleum ether/ethyl acetate (100/1 - 1/1) to give the desired products **2f** (152.5 mg, 85% yield, >99:1).

## 6.10 The kinetic experiments

### 6.10.1 Kinetic reaction profiles of **8** or **9** under 120 °C.

#### Reaction A:

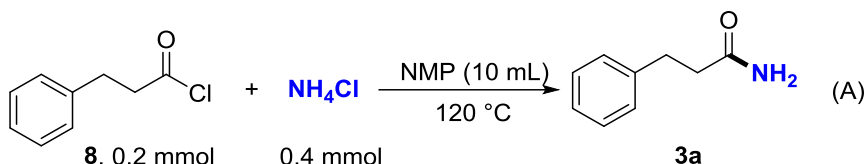

In a glove box, a mixture of 3-phenylpropanoyl chloride **8** (33.7 mg, 0.2 mmol),  $\text{NH}_4\text{Cl}$  (21.4 mg, 0.4 mmol) and NMP (10.0 mL) was added into a 50 ml Young-type tube. The reaction mixture was stirred at 120 °C. At each sampling time 0.2 mL reaction mixture was extracted and examined by gas chromatography (Agilent 7890B). The yield of **3a** was determined by GC analysis using *n*-tetradecane as internal standard (Figure S13).

#### Reaction B:

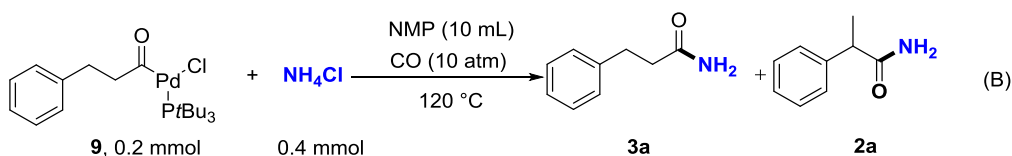

In a glove box, a mixture of acyl palladium **9** (95.4 mg, 0.2 mmol),  $\text{NH}_4\text{Cl}$  (21.4 mg, 0.4 mmol) and NMP (10.0 mL) was added into a teflon tube which was placed in an autoclave (50 mL). The autoclave was purged and charged with CO (10 atm) after taken out from the glove box. The reaction mixture was stirred at 120 °C. At each sampling time 0.2 mL reaction mixture was extracted and examined by gas chromatography (Agilent 7890B). The yield of (**2a**+**3a**) was determined using *n*-tetradecane as internal standard by GC analysis (Figure S13).

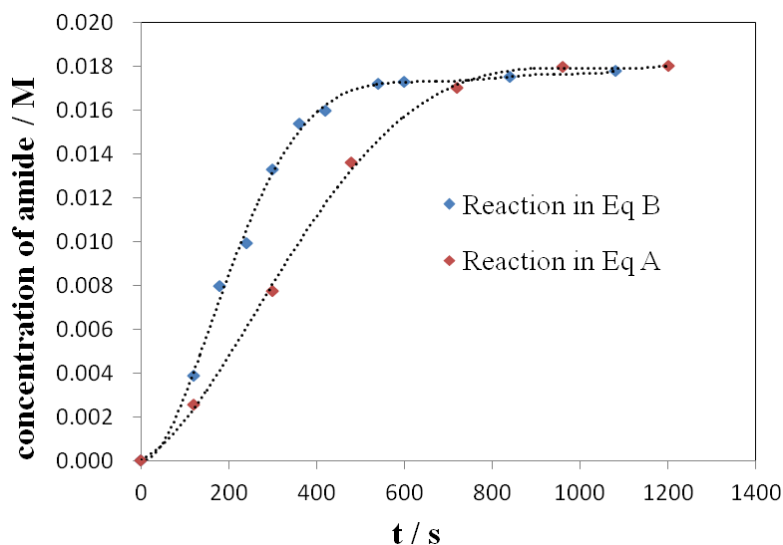

**Figure S13.** Reaction profiles of **8** (Eq A) and **9** (Eq B) under 120 °C.

#### Reference:

- (1) (a) Li, S.; Huang, K.; Cao, B.; Zhang, J.; Wu, W.; Zhang, X. *Angew. Chem. Int. Ed.* **2012**, *51*, 8573. (b) Monfette, S.; Turner, Z. R.; Semproni, S. P.; Chirik, P. J. *J. Am. Chem. Soc.* **2012**, *134*, 4561. (c) Müller, D. S.; Marek, I. *J. Am. Chem. Soc.* **2015**, *137*, 15414.
- (2) Guo, R.; Yang, H.; Tang, P. *Chem. Commun.* **2015**, *51*, 8829.
- (3) (a) Lipshutz, B. H.; Ghorai, S.; Leong, W. W. Y. *J. Org. Chem.* **2009**, *74*, 2854. (b) Li, S.; Li, F.; Gong, J.; Yang, Z. *Org. Lett.* **2015**, *17*, 1240. (c) Chen, X.-M.; Ning, X.-S.; Kang, Y.-B. *Org. Lett.* **2016**, *18*, 5368.
- (4) (a) Hills, I. D.; Fu, G. C. *J. Am. Chem. Soc.* **2004**, *126*, 13178. (b) Hu, Y.; Shen, Z.; Huang, H. *ACS Catal.* **2016**, *6*, 6785.
- (5) Quesnel, J. S.; Arndtsen, B. A. *J. Am. Chem. Soc.* **2013**, *135*, 16841.

## **7. Copies for $^1\text{H}$ NMR and $^{13}\text{C}$ NMR of the amides**



ZGY-X150922-3 HNMR

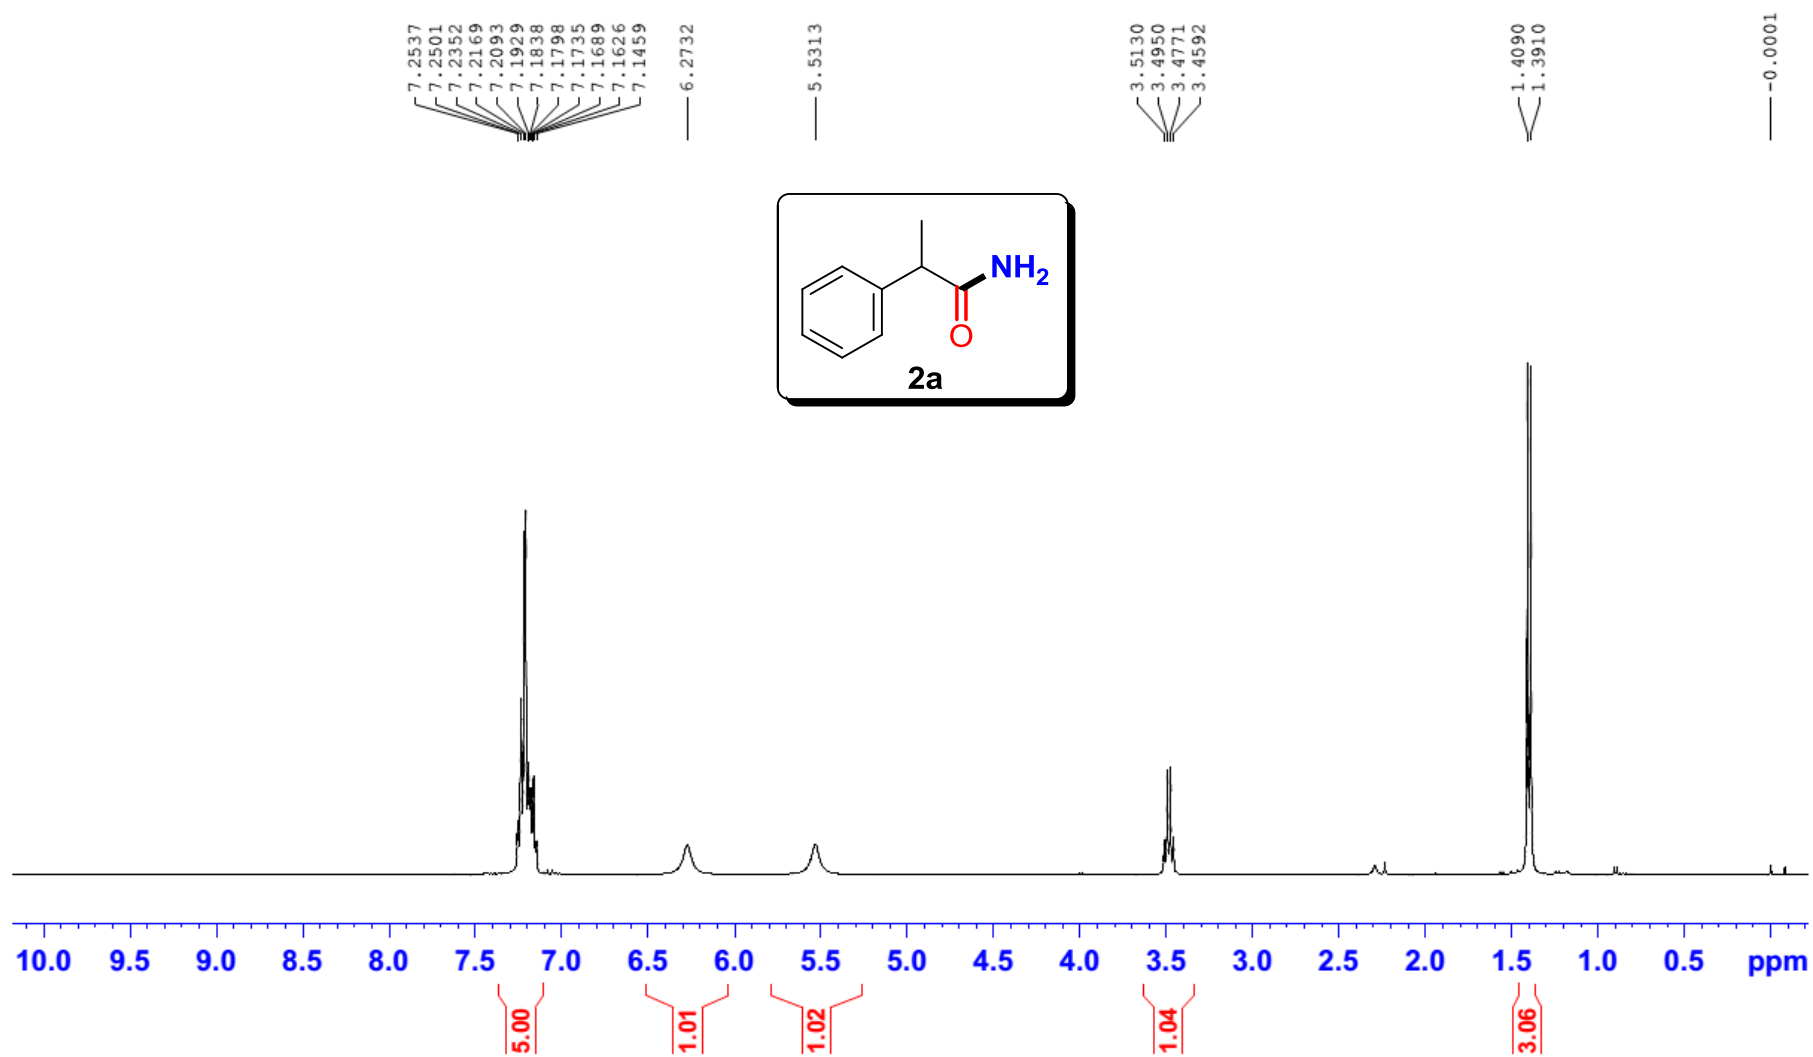

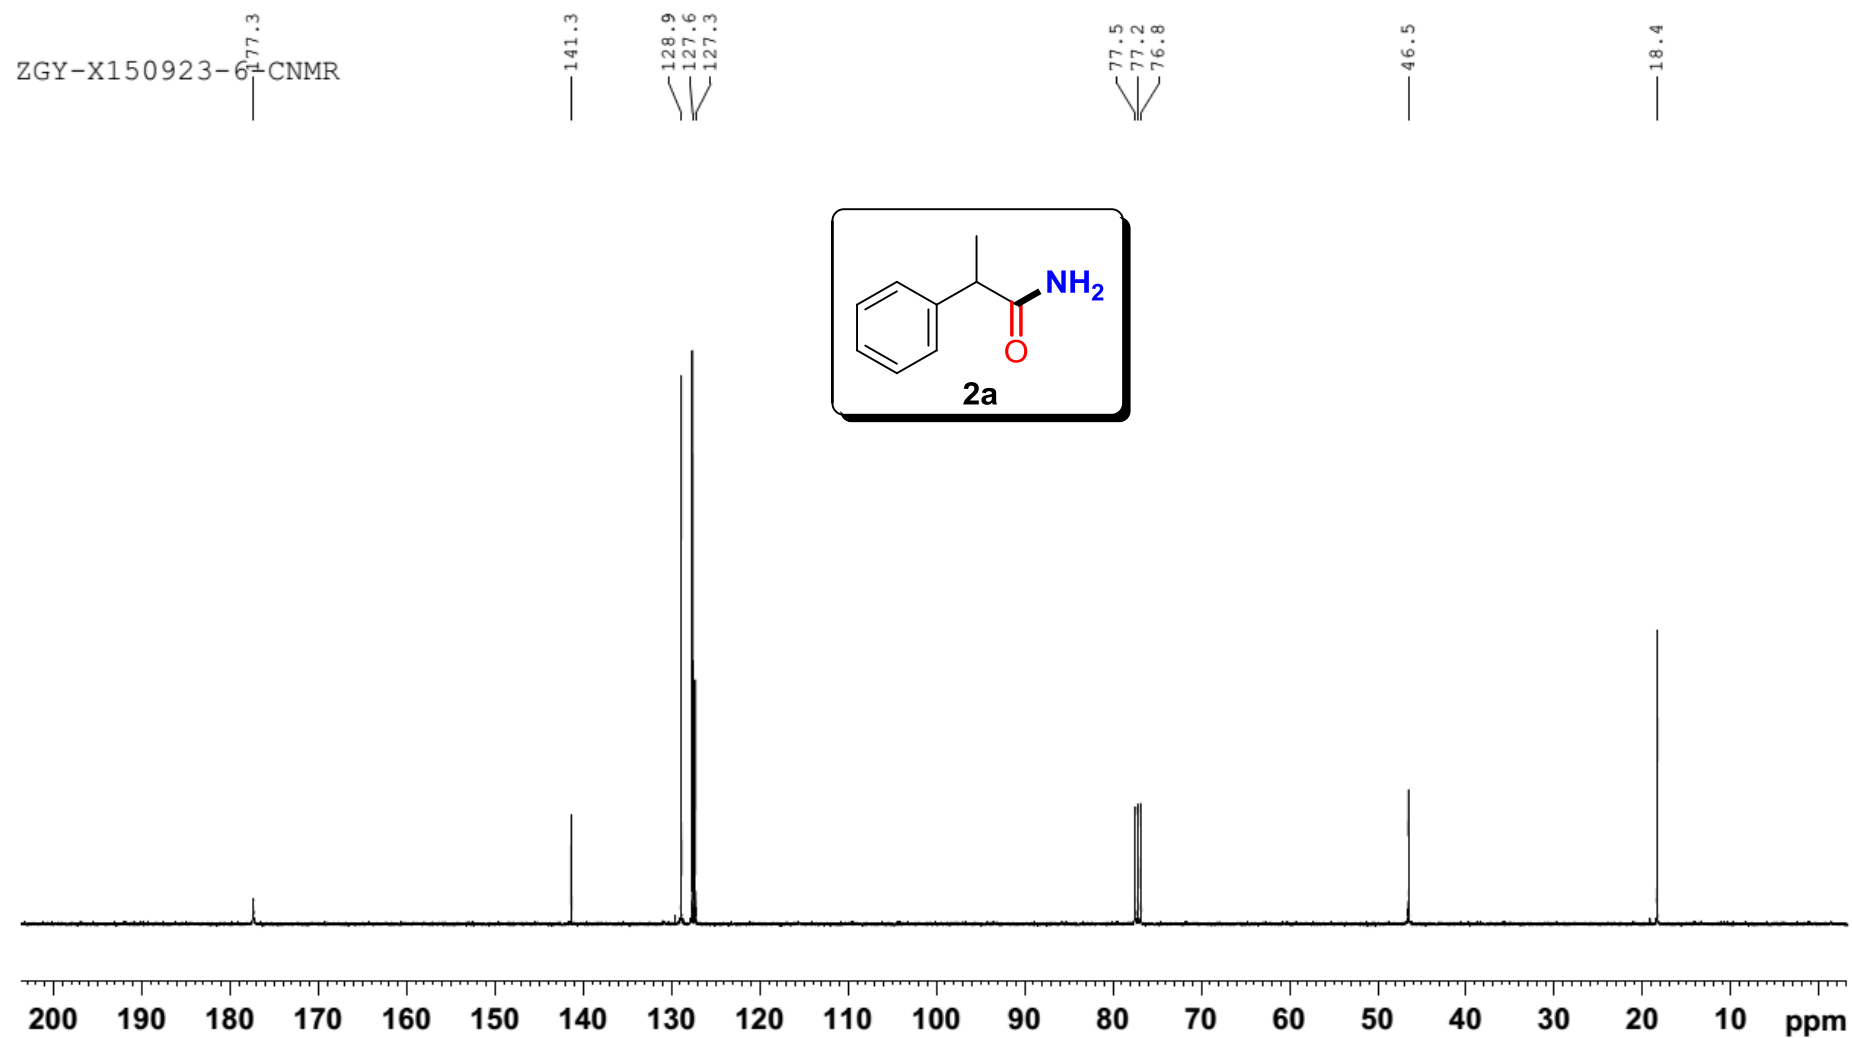

ZGY-X150926-4 H NMR

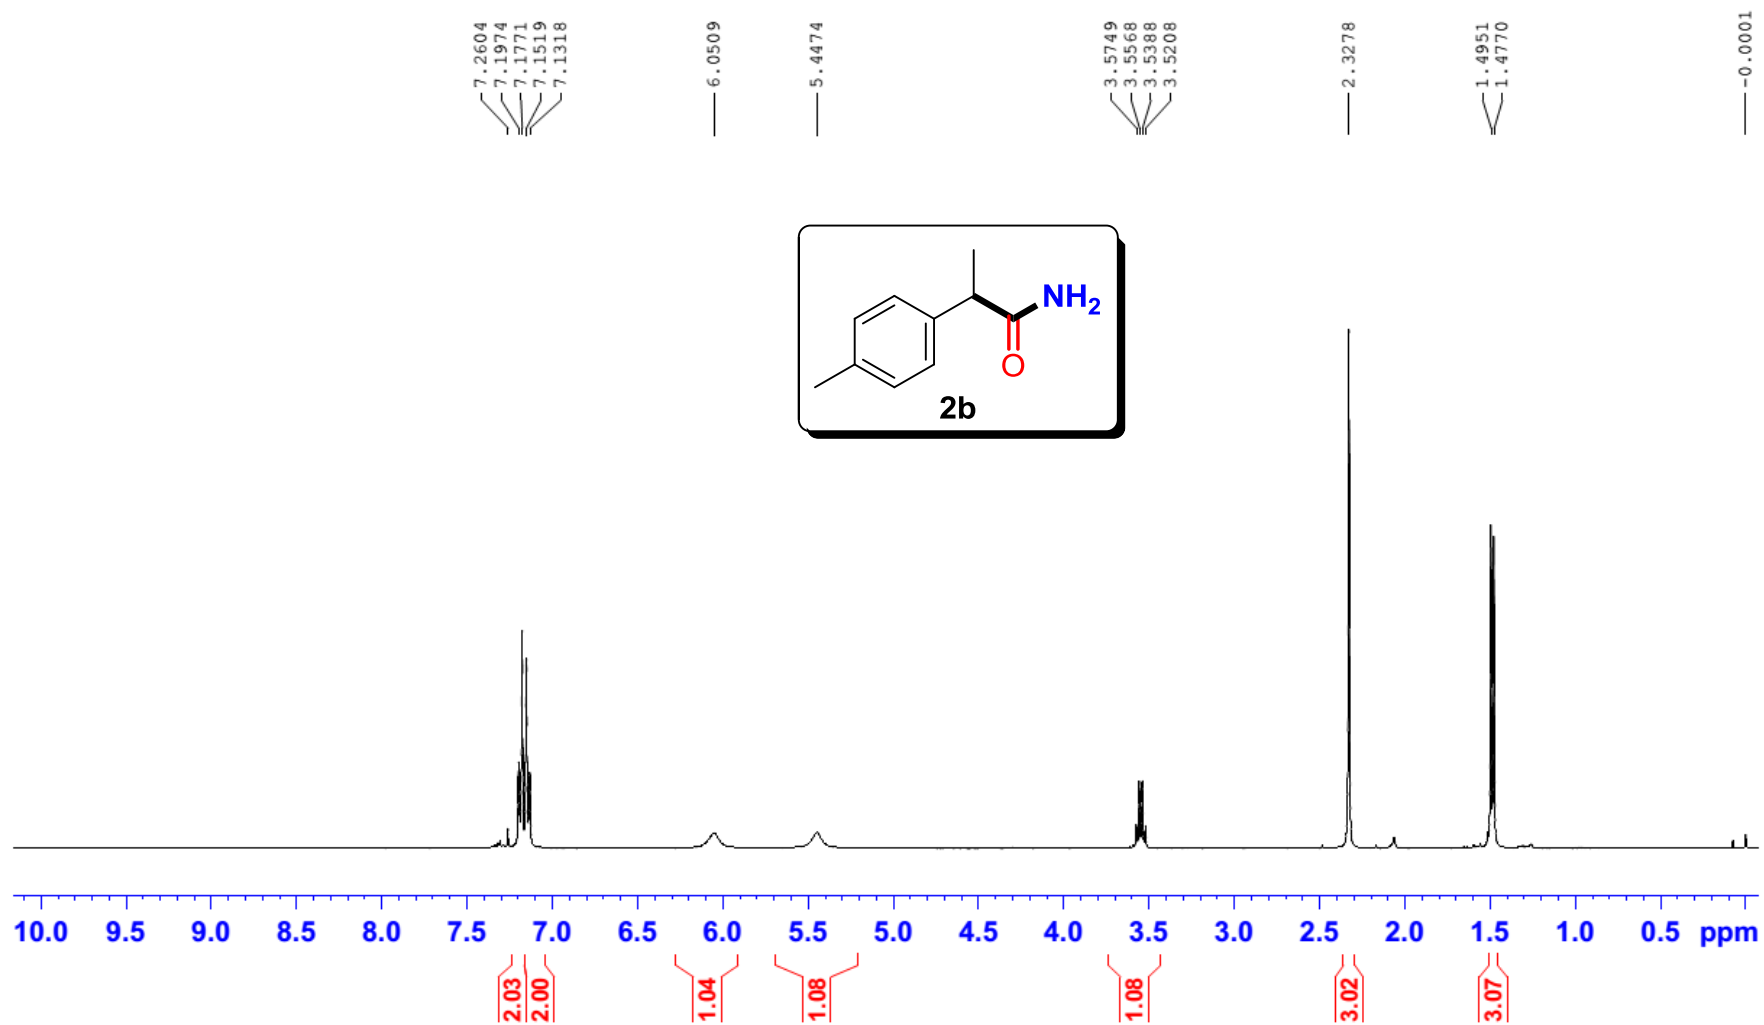

ZGY-X150922-5 C NMR

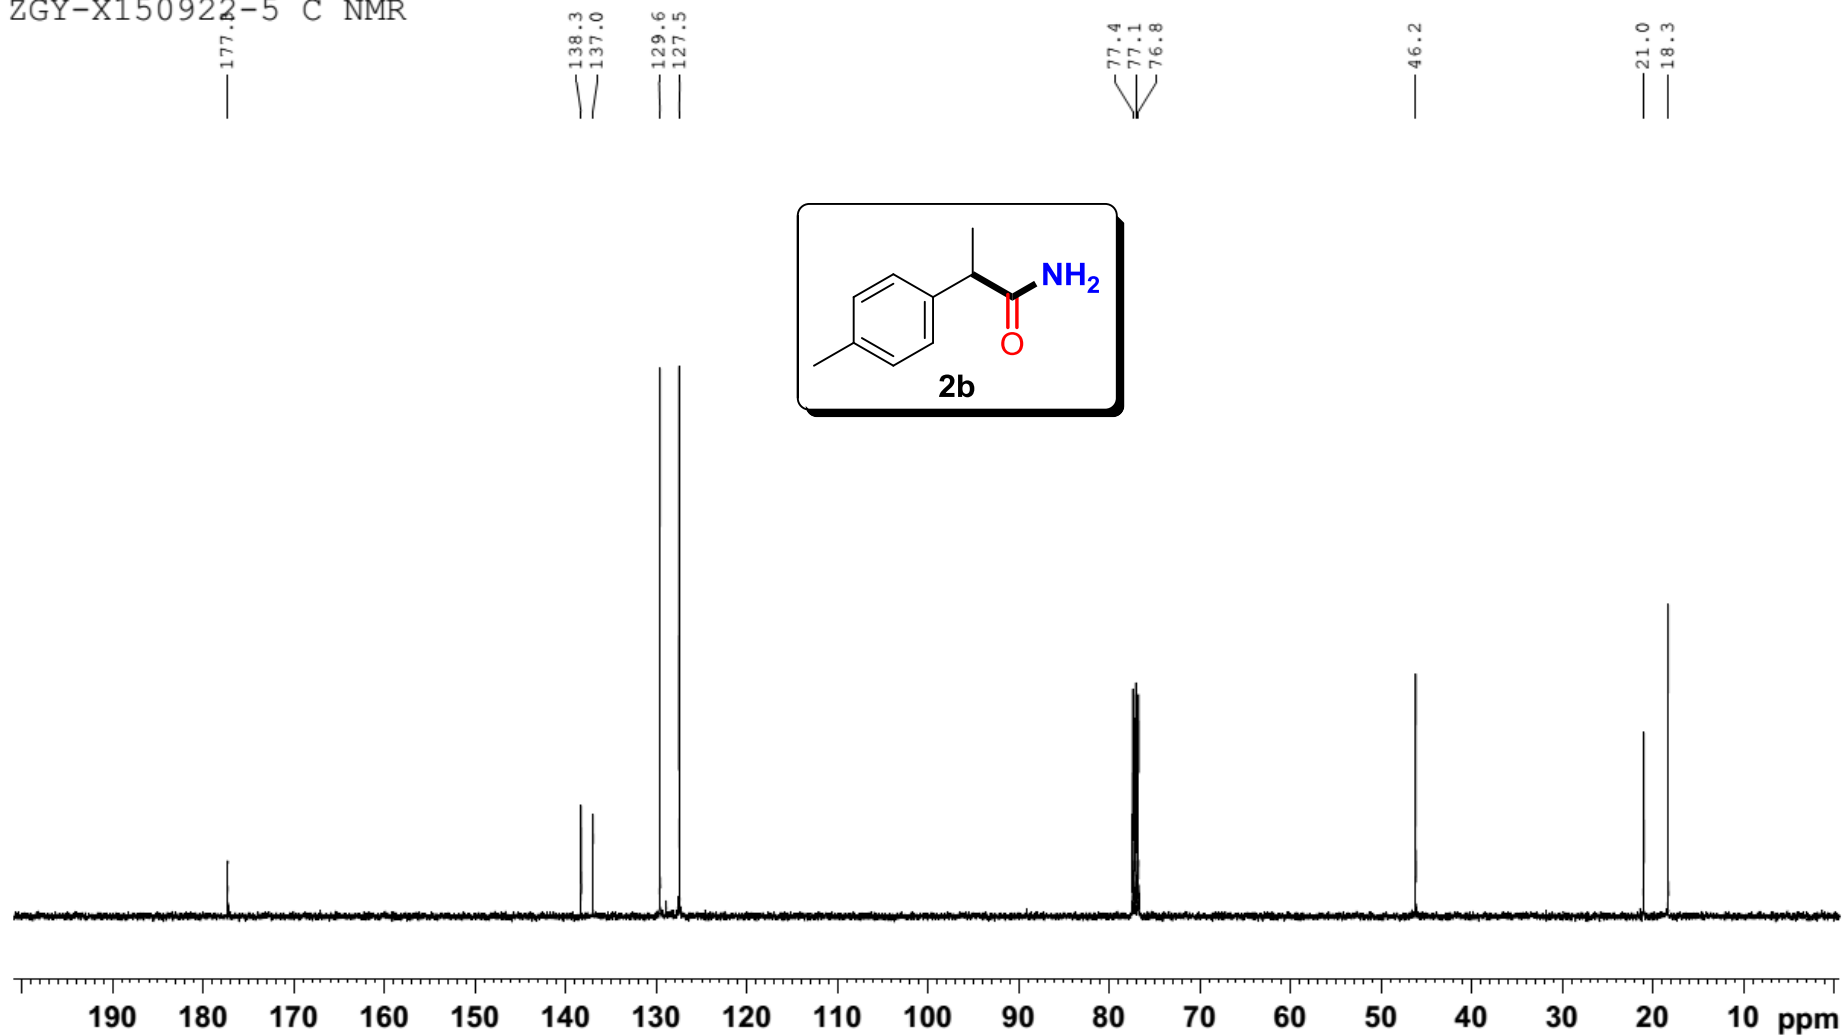

ZGY-X150927-5-HNMR

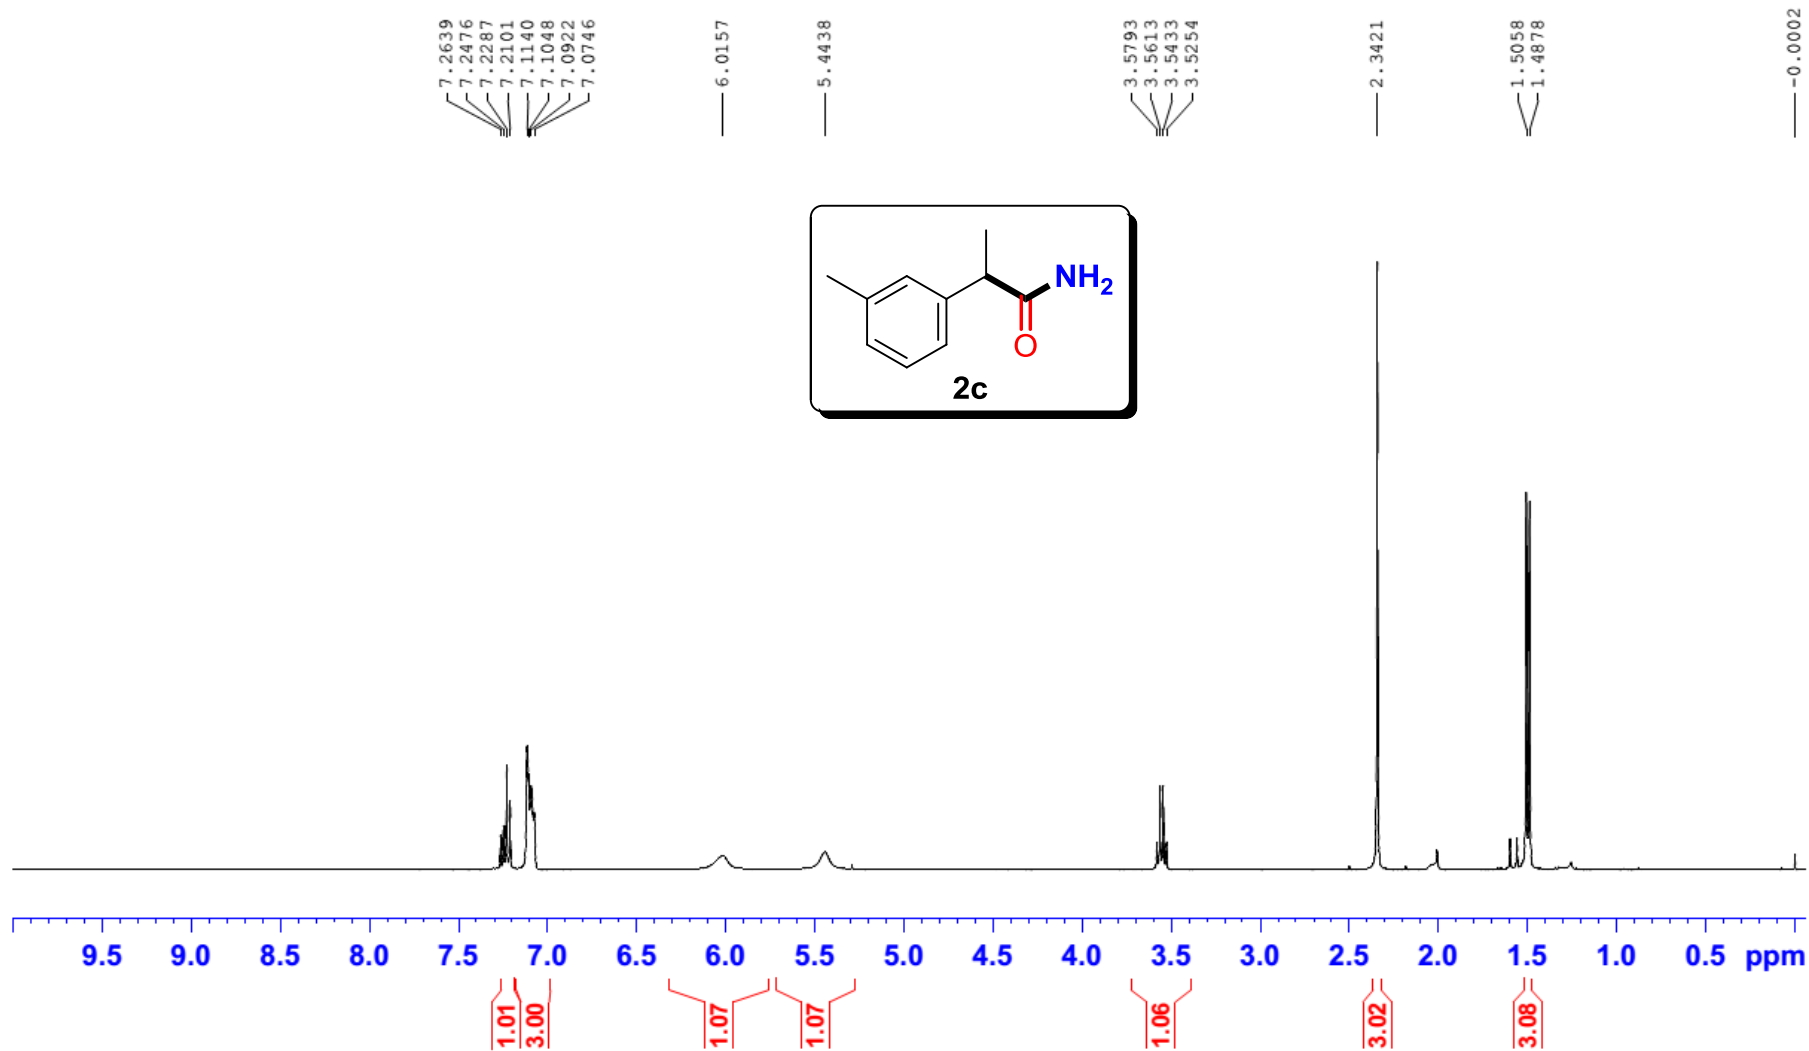

ZGY-X150927-5-CNMR

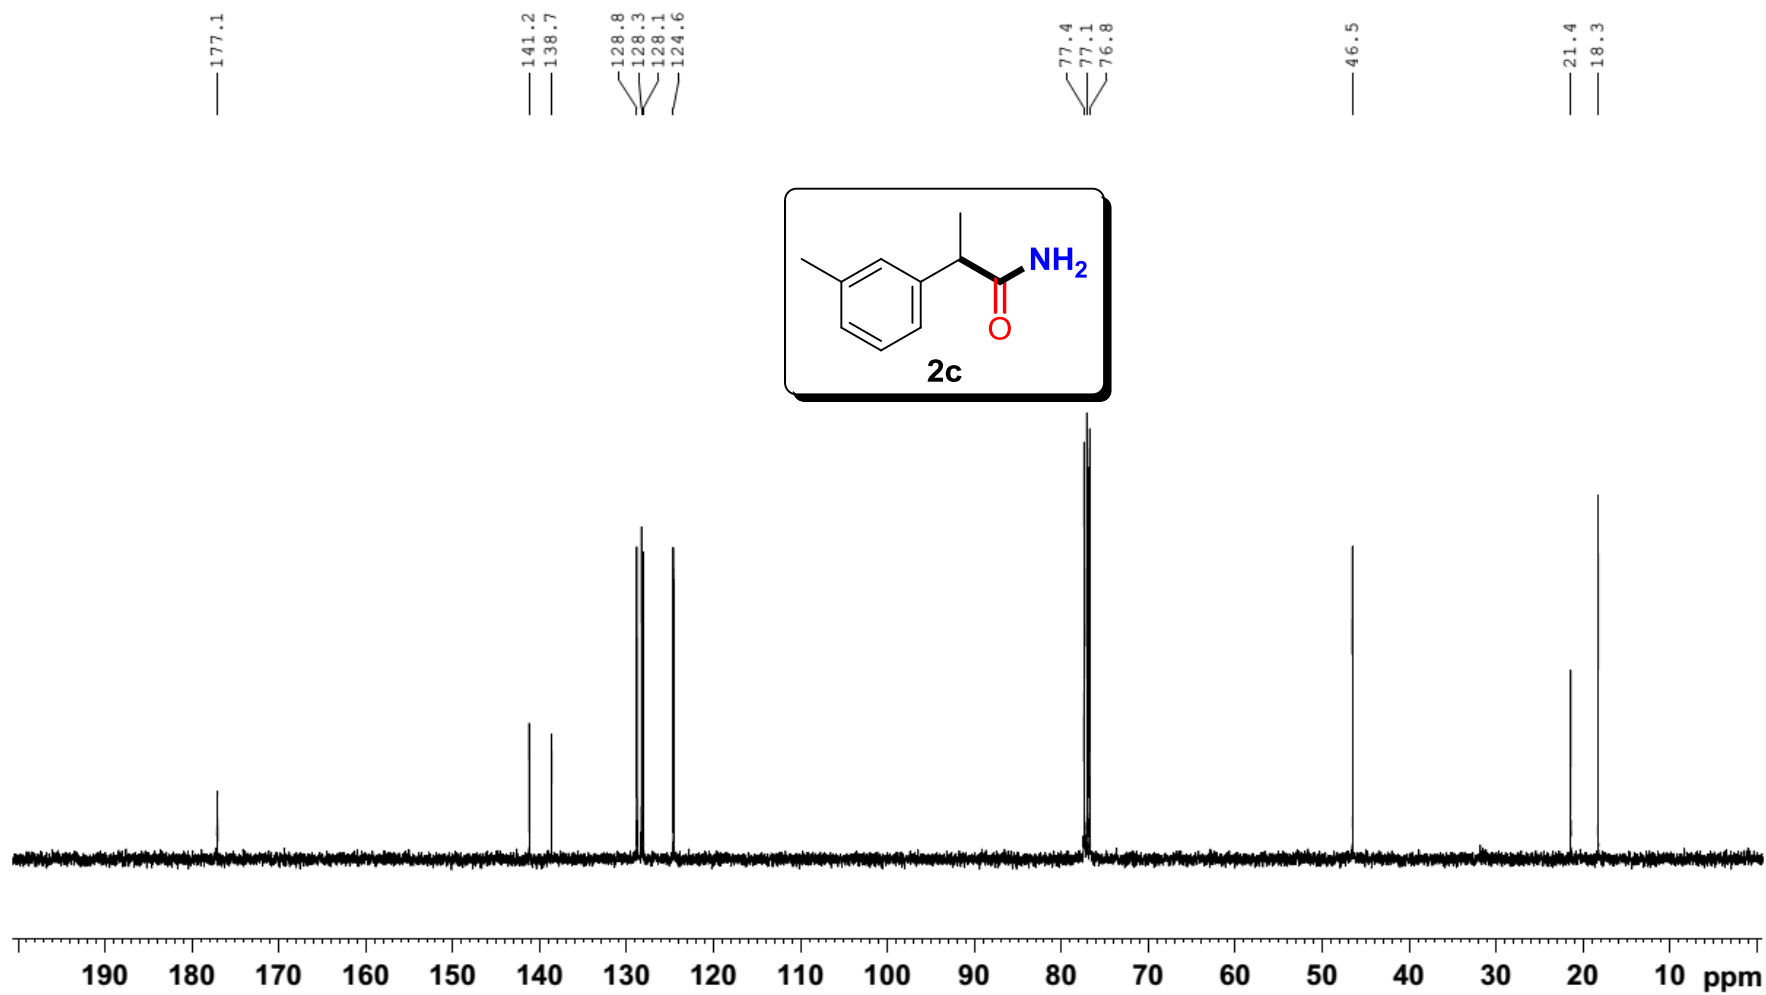

ZGY-X150927-7-HNMR

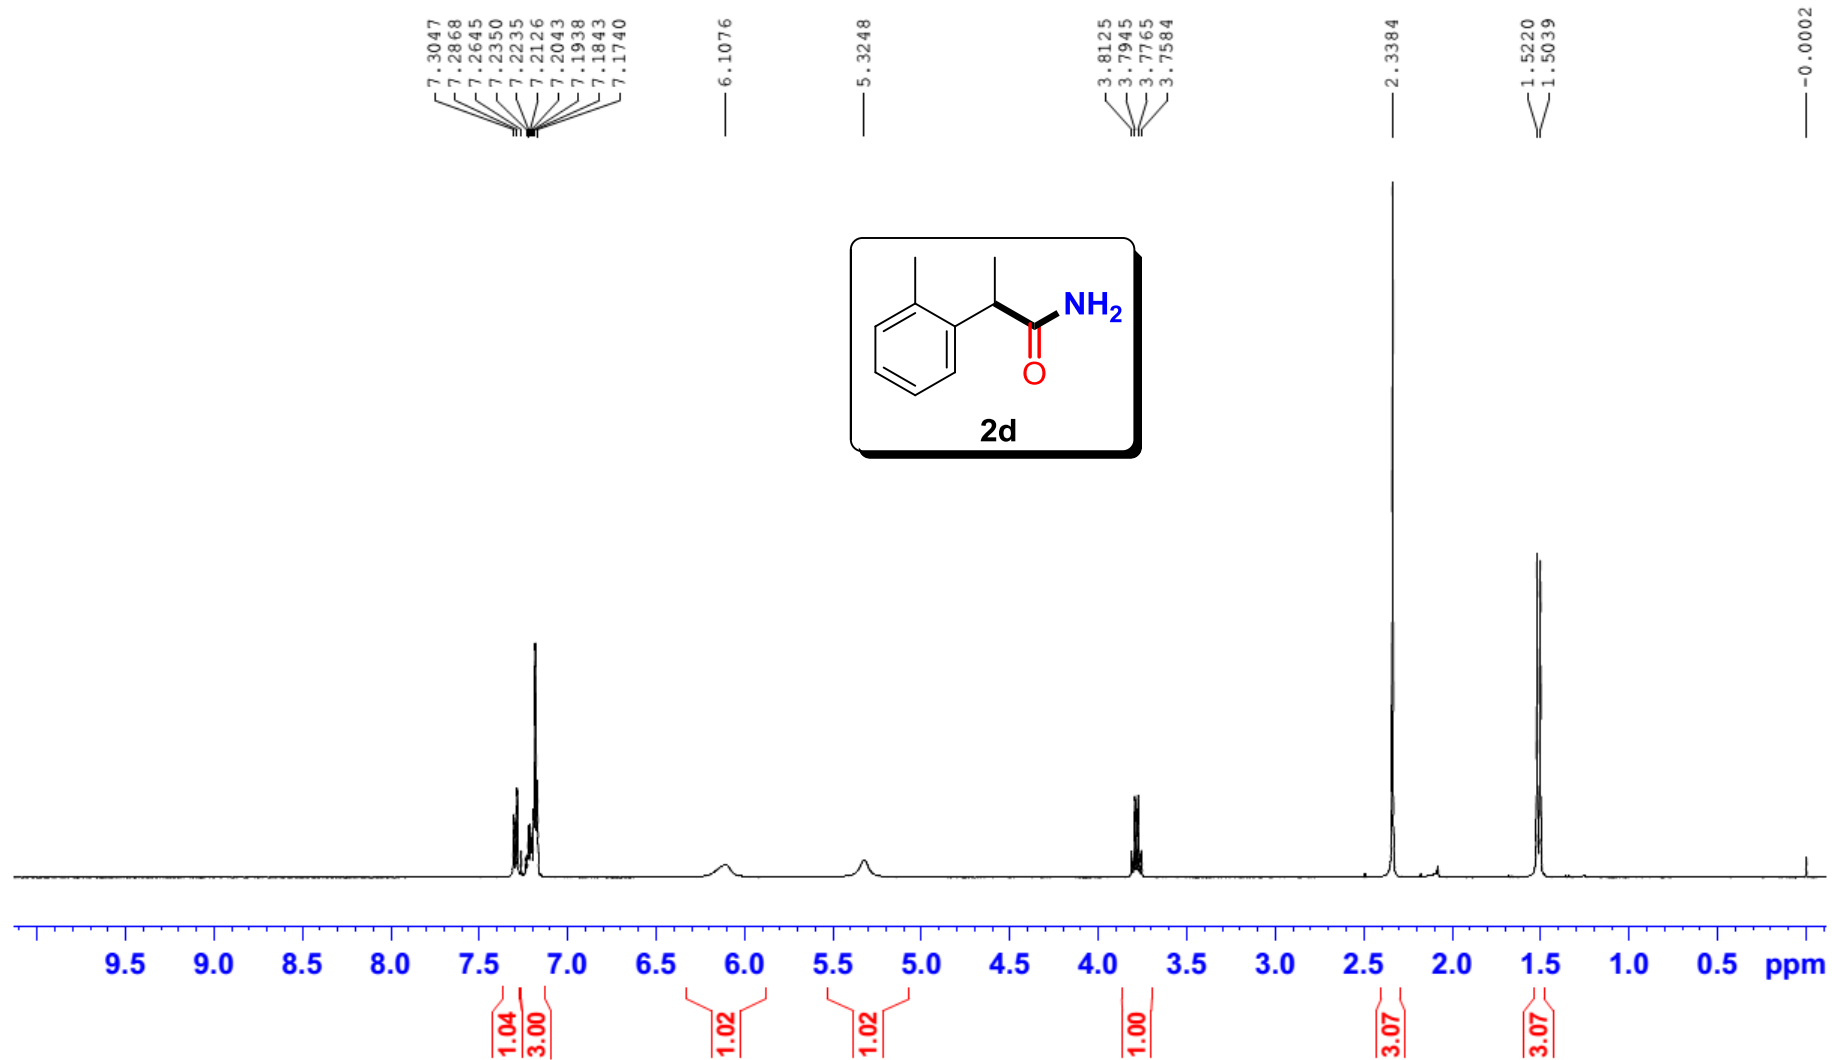

ZGY-X150927-7-CNMR

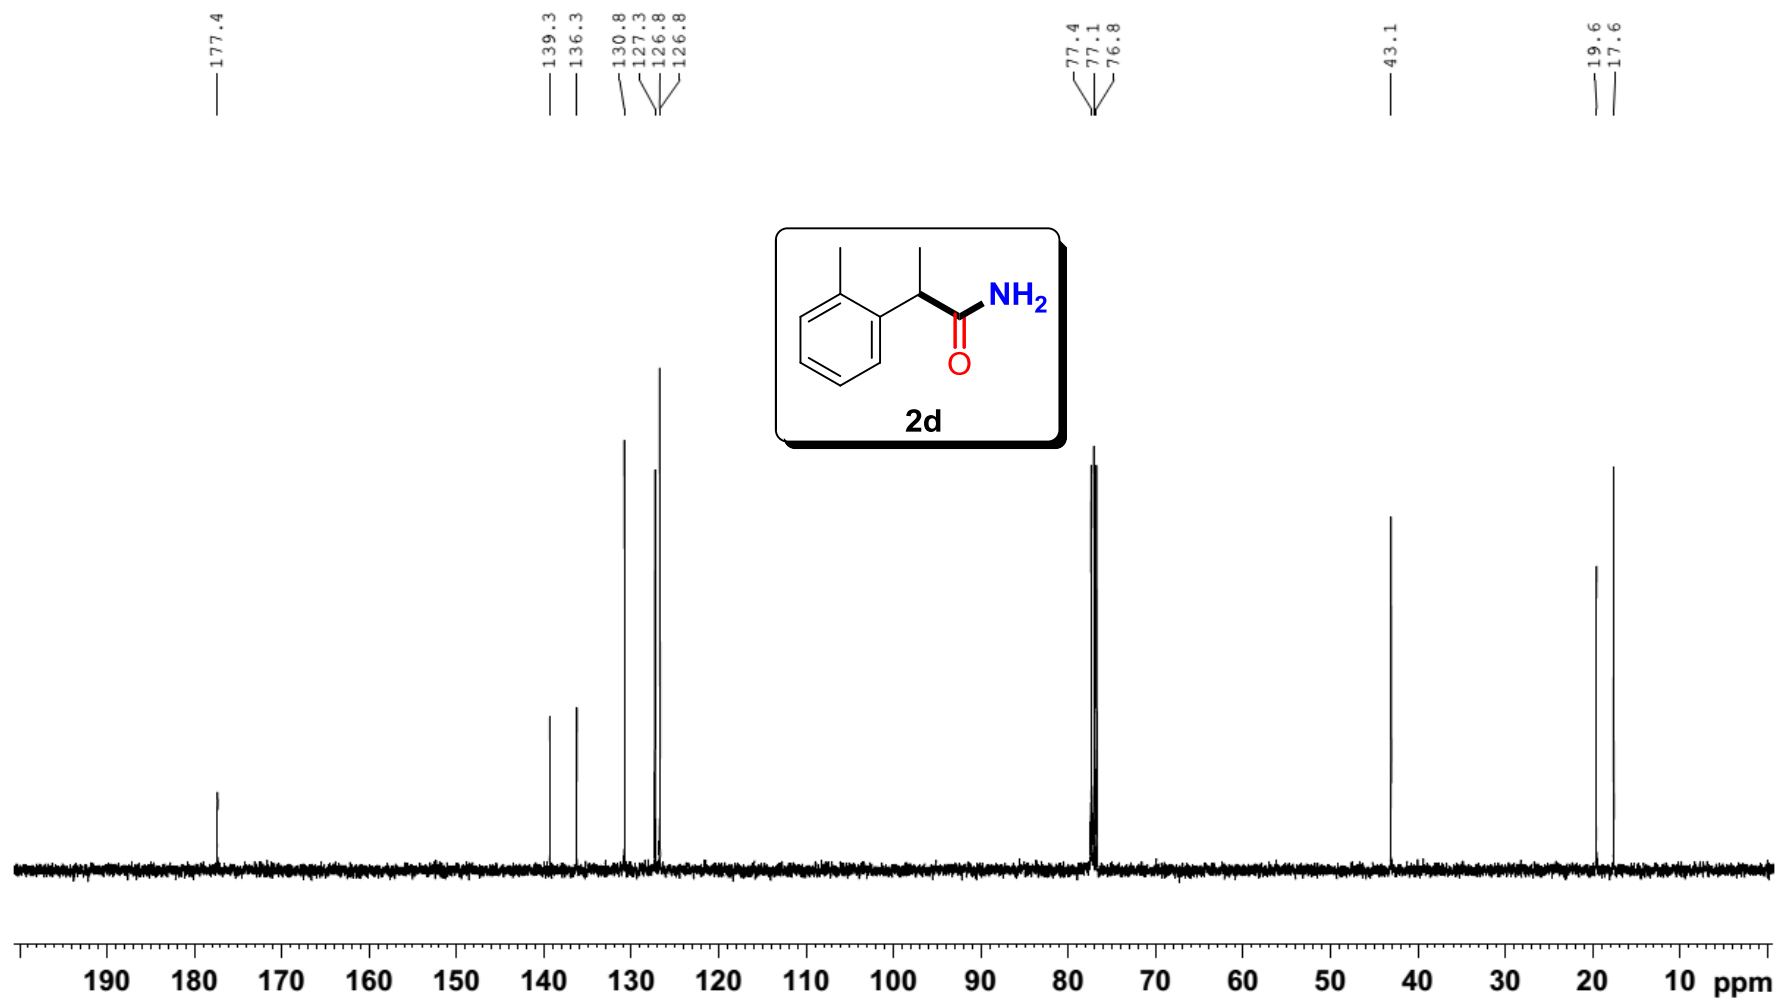



Chemical structure of compound **2e** is shown in the inset: CC(C)(C)c1ccc(cc1)C(=O)N.

<sup>1</sup>H NMR spectrum (CDCl<sub>3</sub>) data:

| Chemical Shift (ppm)                                                   | Integration |
|------------------------------------------------------------------------|-------------|
| 7.3765, 7.3719, 7.3605, 7.3556, 7.2637, 7.2456, 7.2409, 7.2289, 7.2249 | 1.91        |
| 5.7212, 5.3663                                                         | 1.01        |
| 3.6066, 3.5885, 3.5705, 3.5525                                         | 1.01        |
| 1.5242, 1.5061, 1.3117                                                 | 3.07        |
| 1.3117                                                                 | 9.00        |
| 0.0002                                                                 | -           |

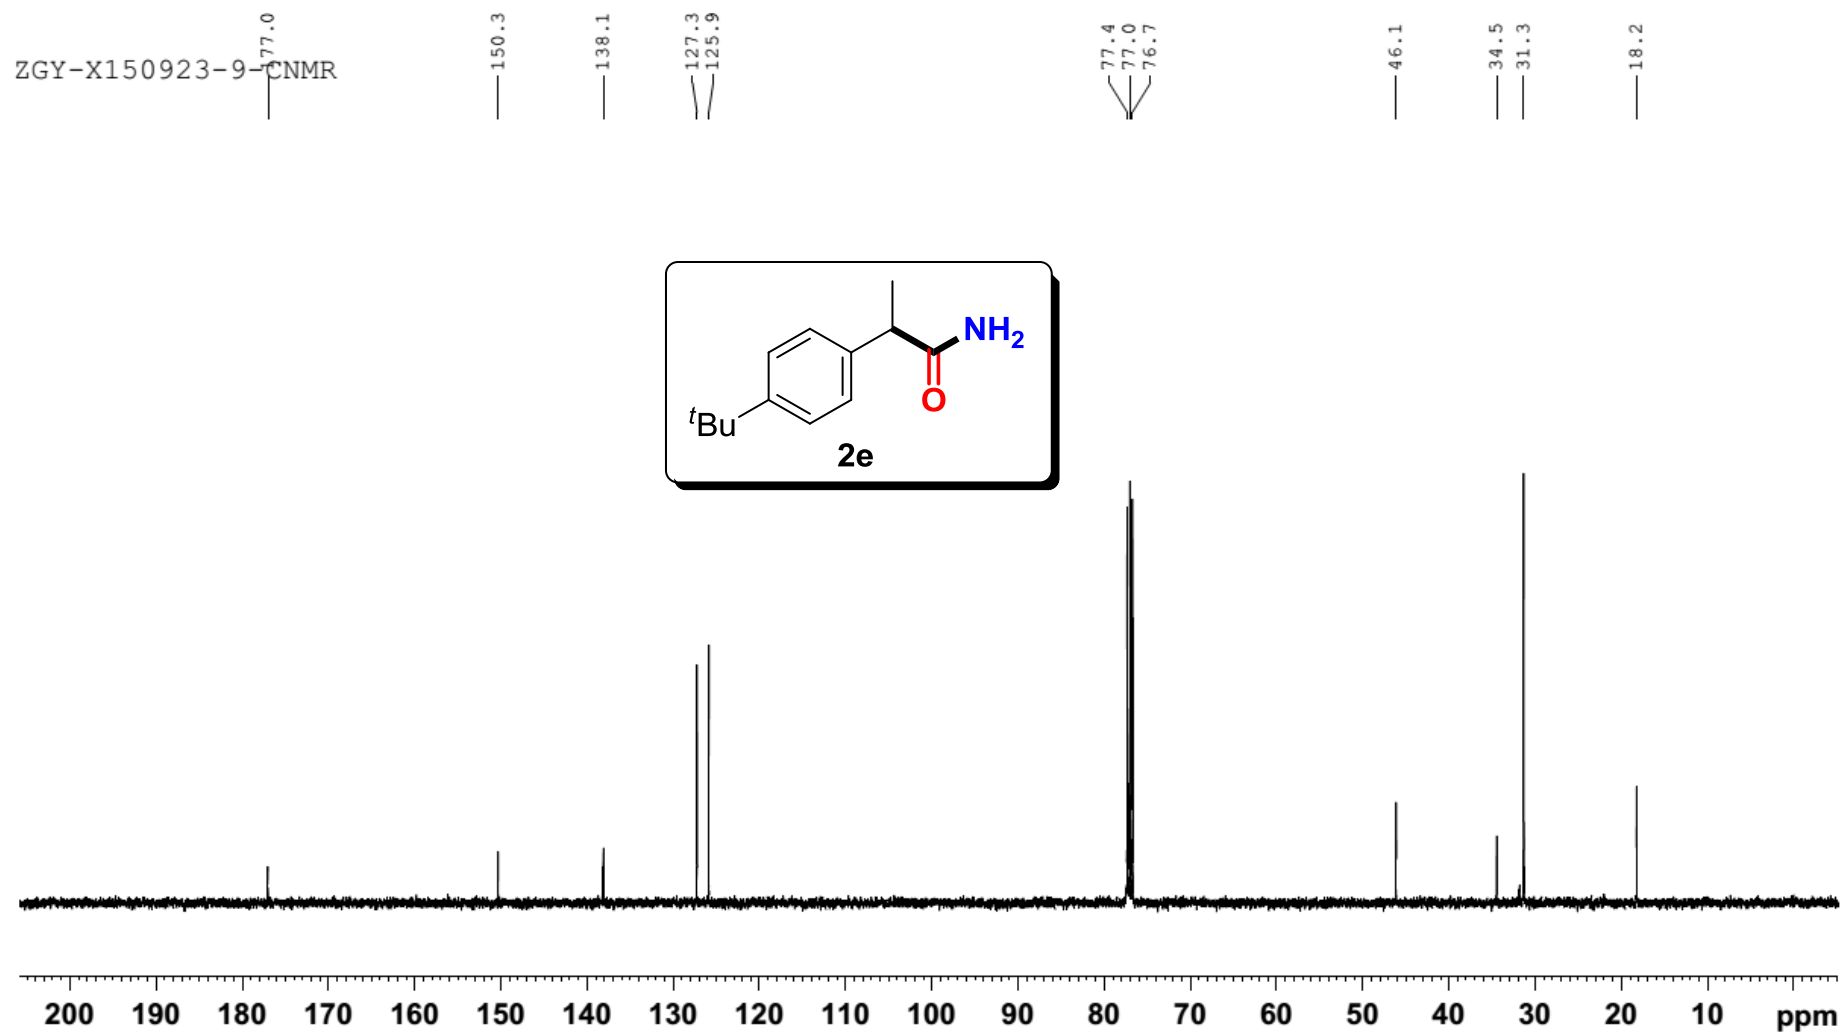

ZGY-X150927-6-HNMR

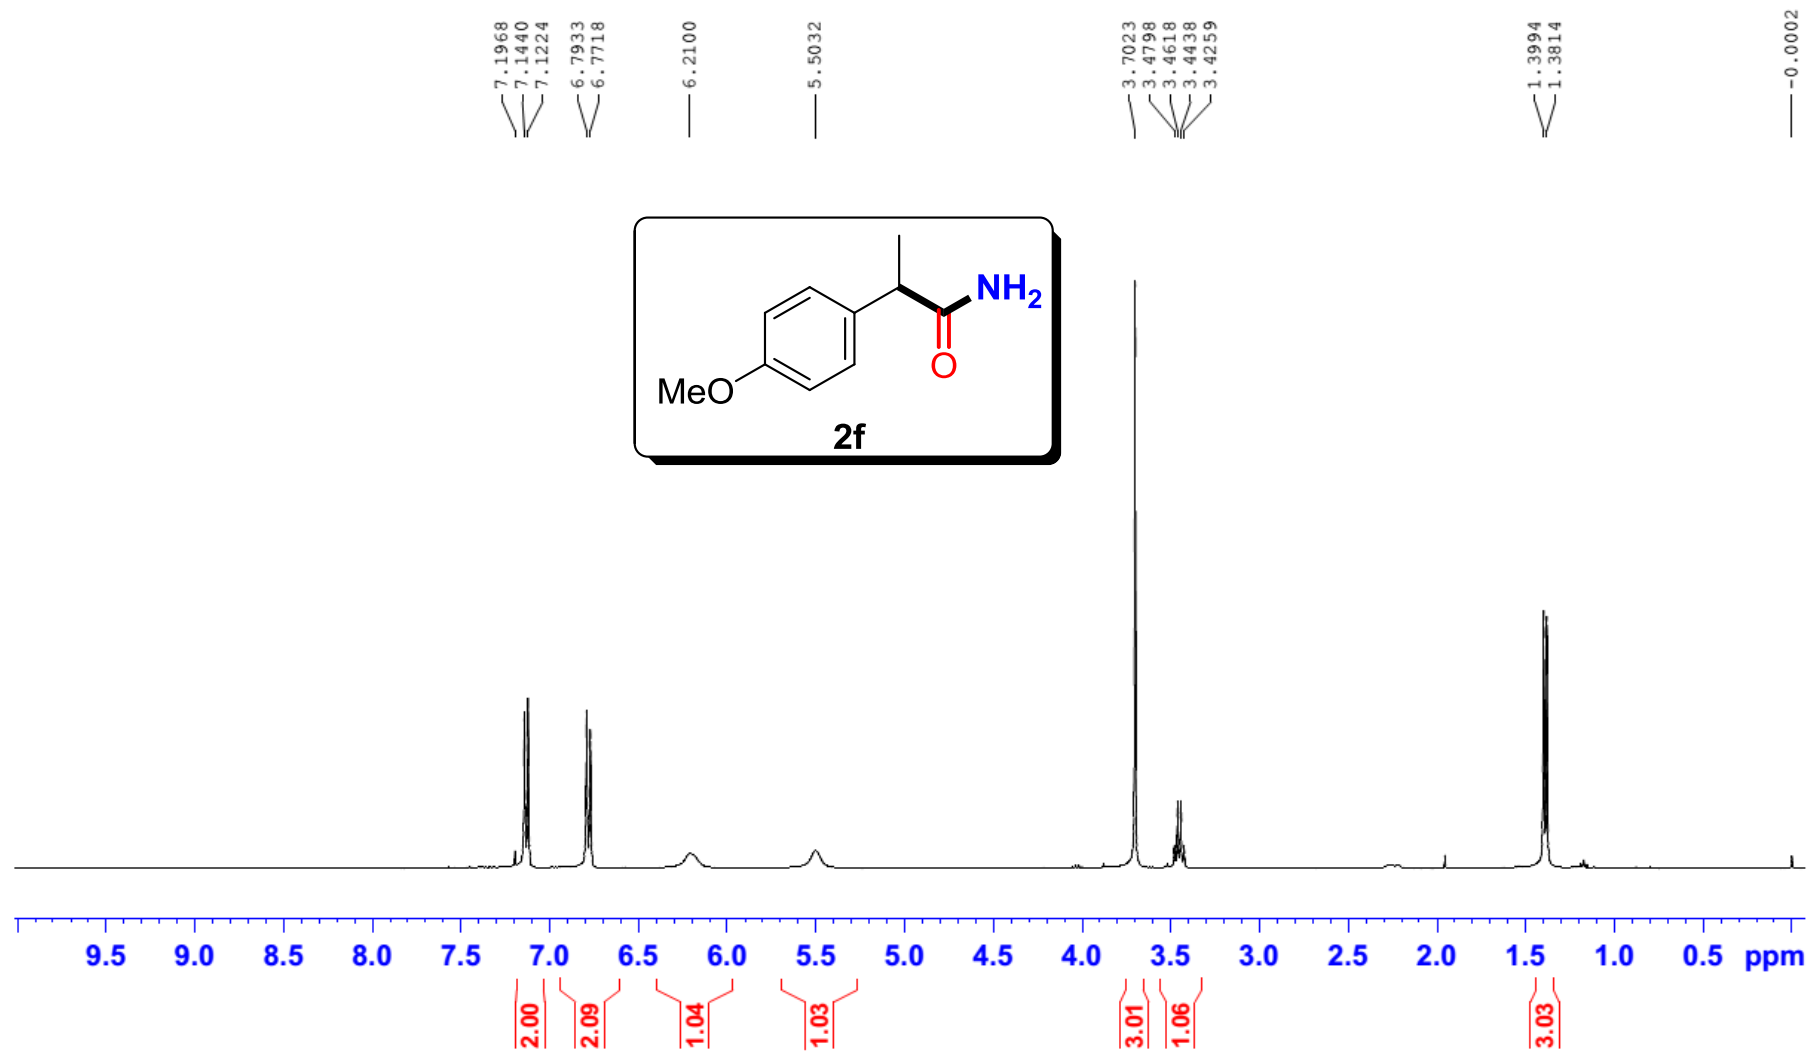

ZGY-X150927-6-CNMR

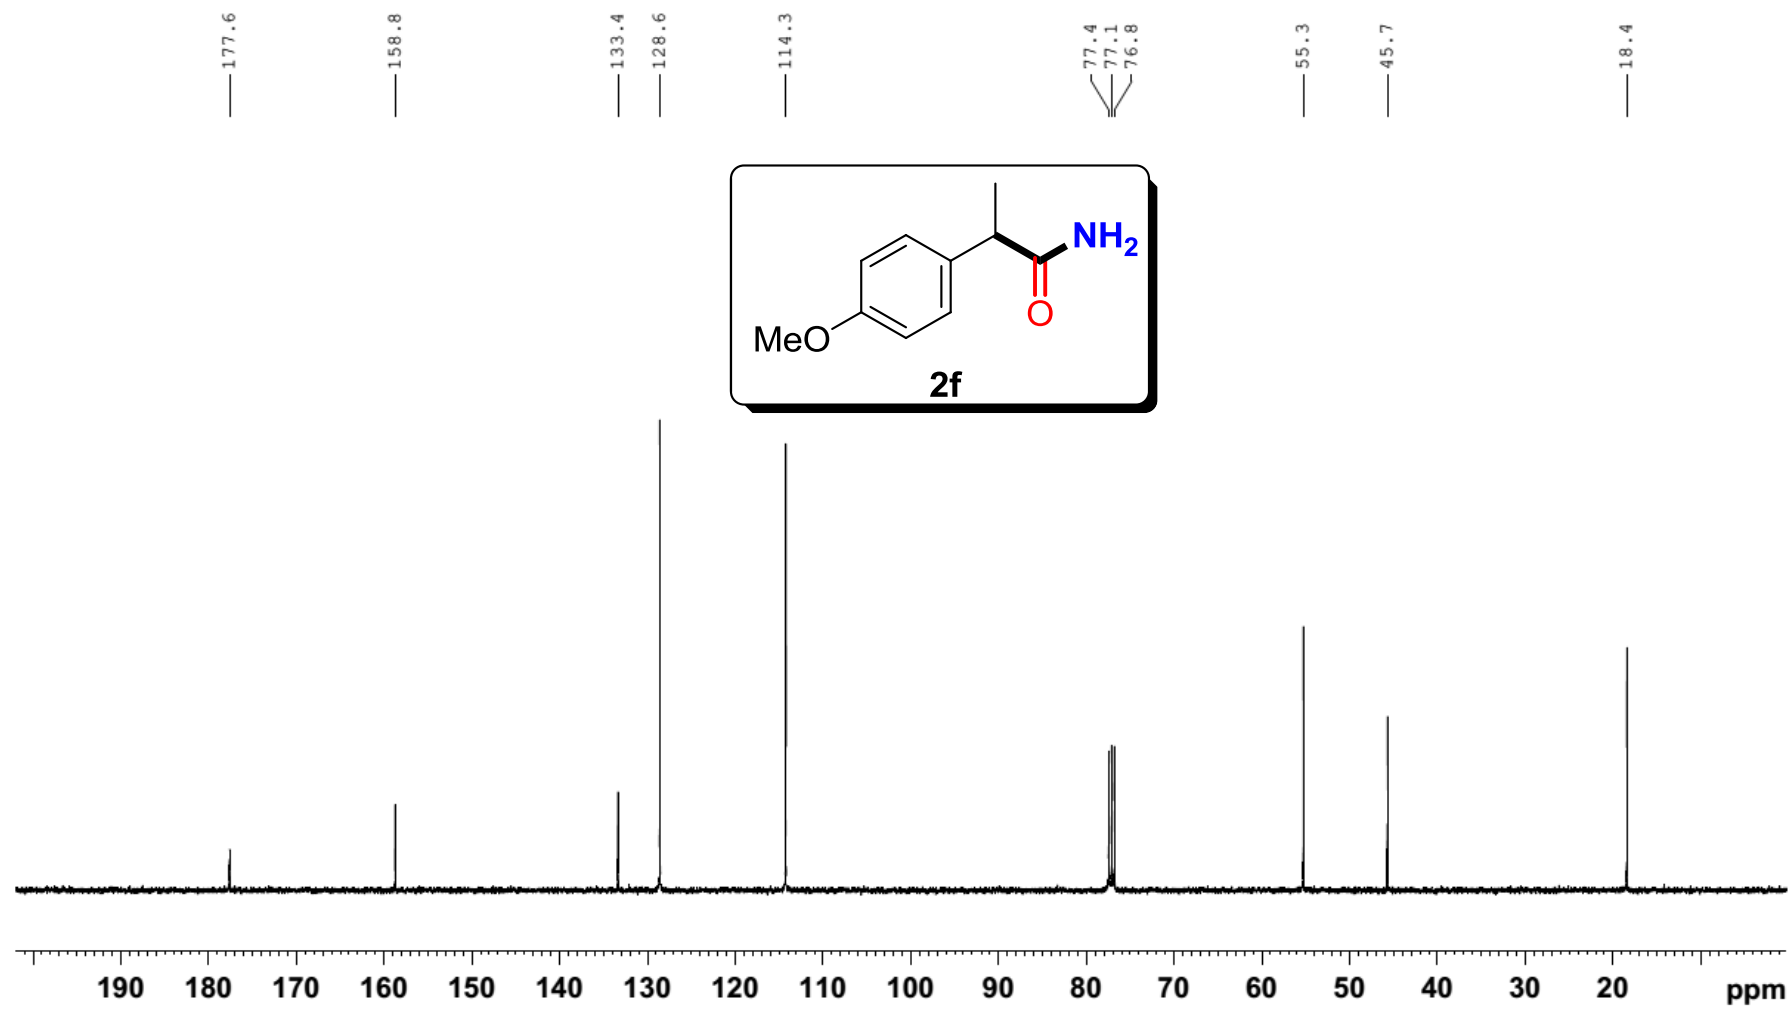

ZCY-X150928-4-HNMR

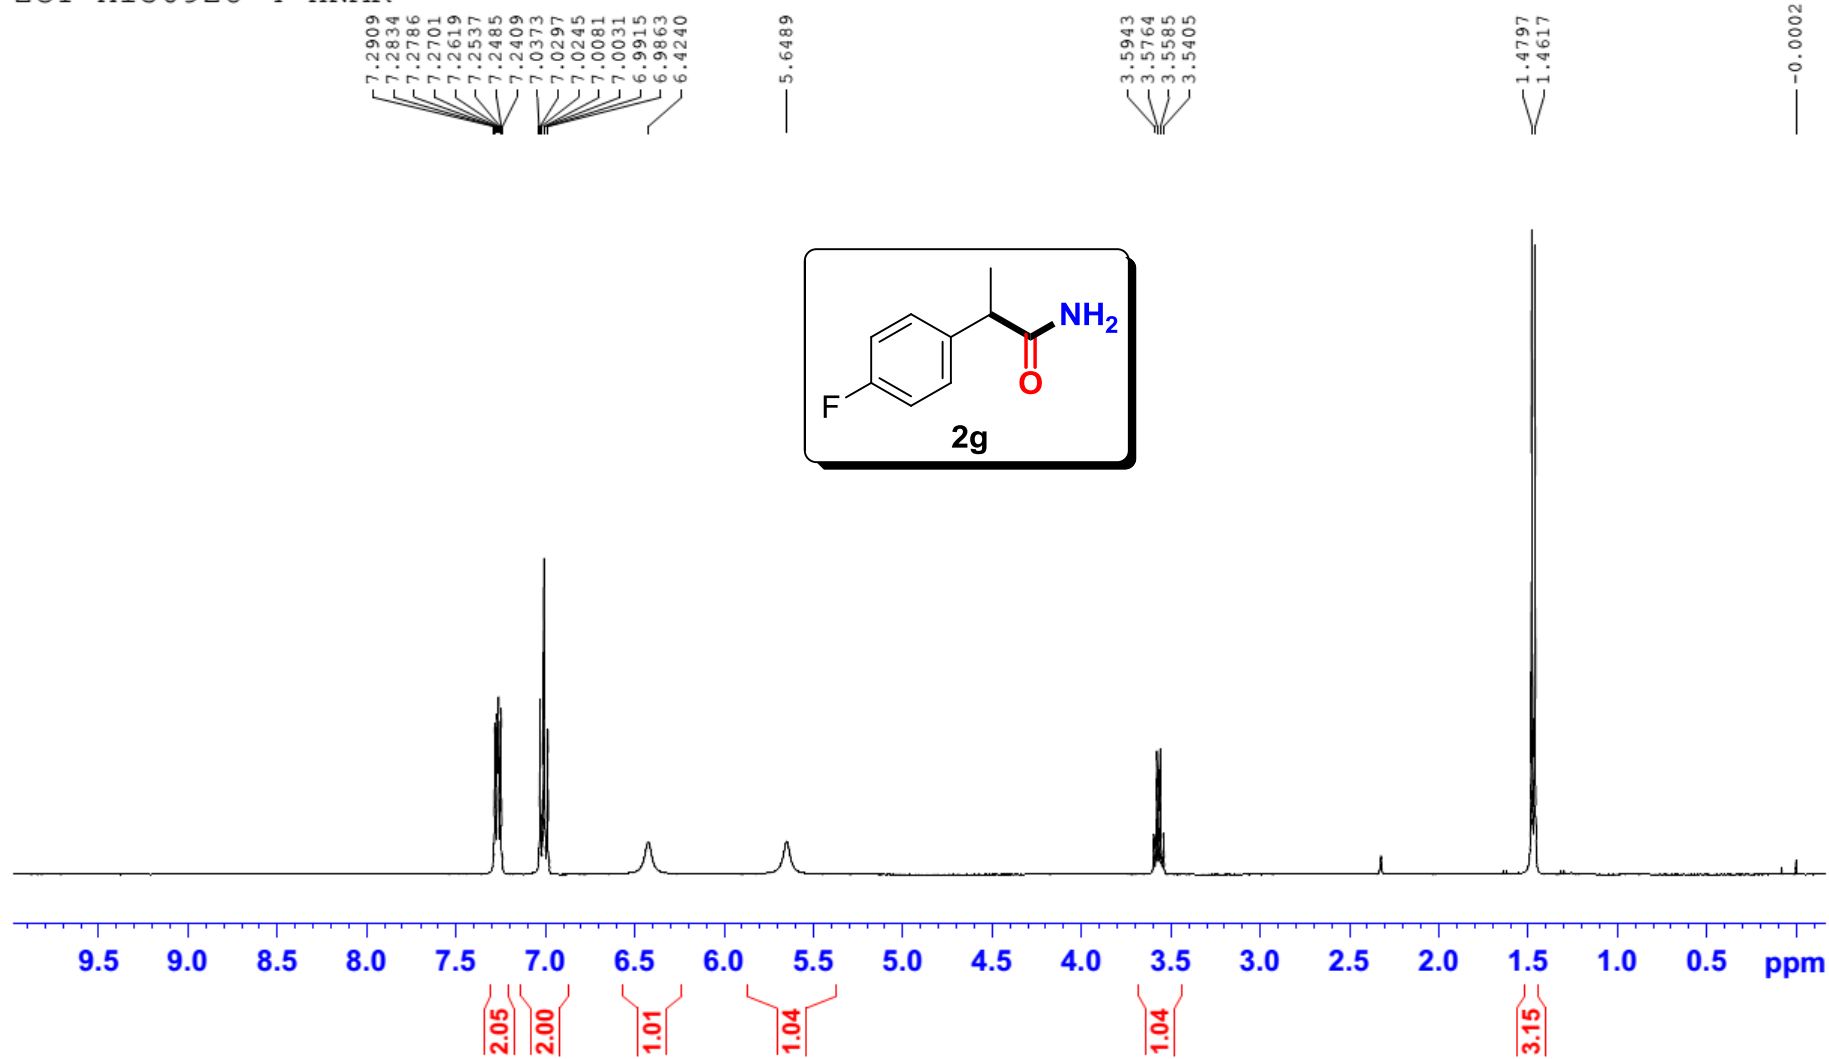

ZCY-X150928-4-CNMR

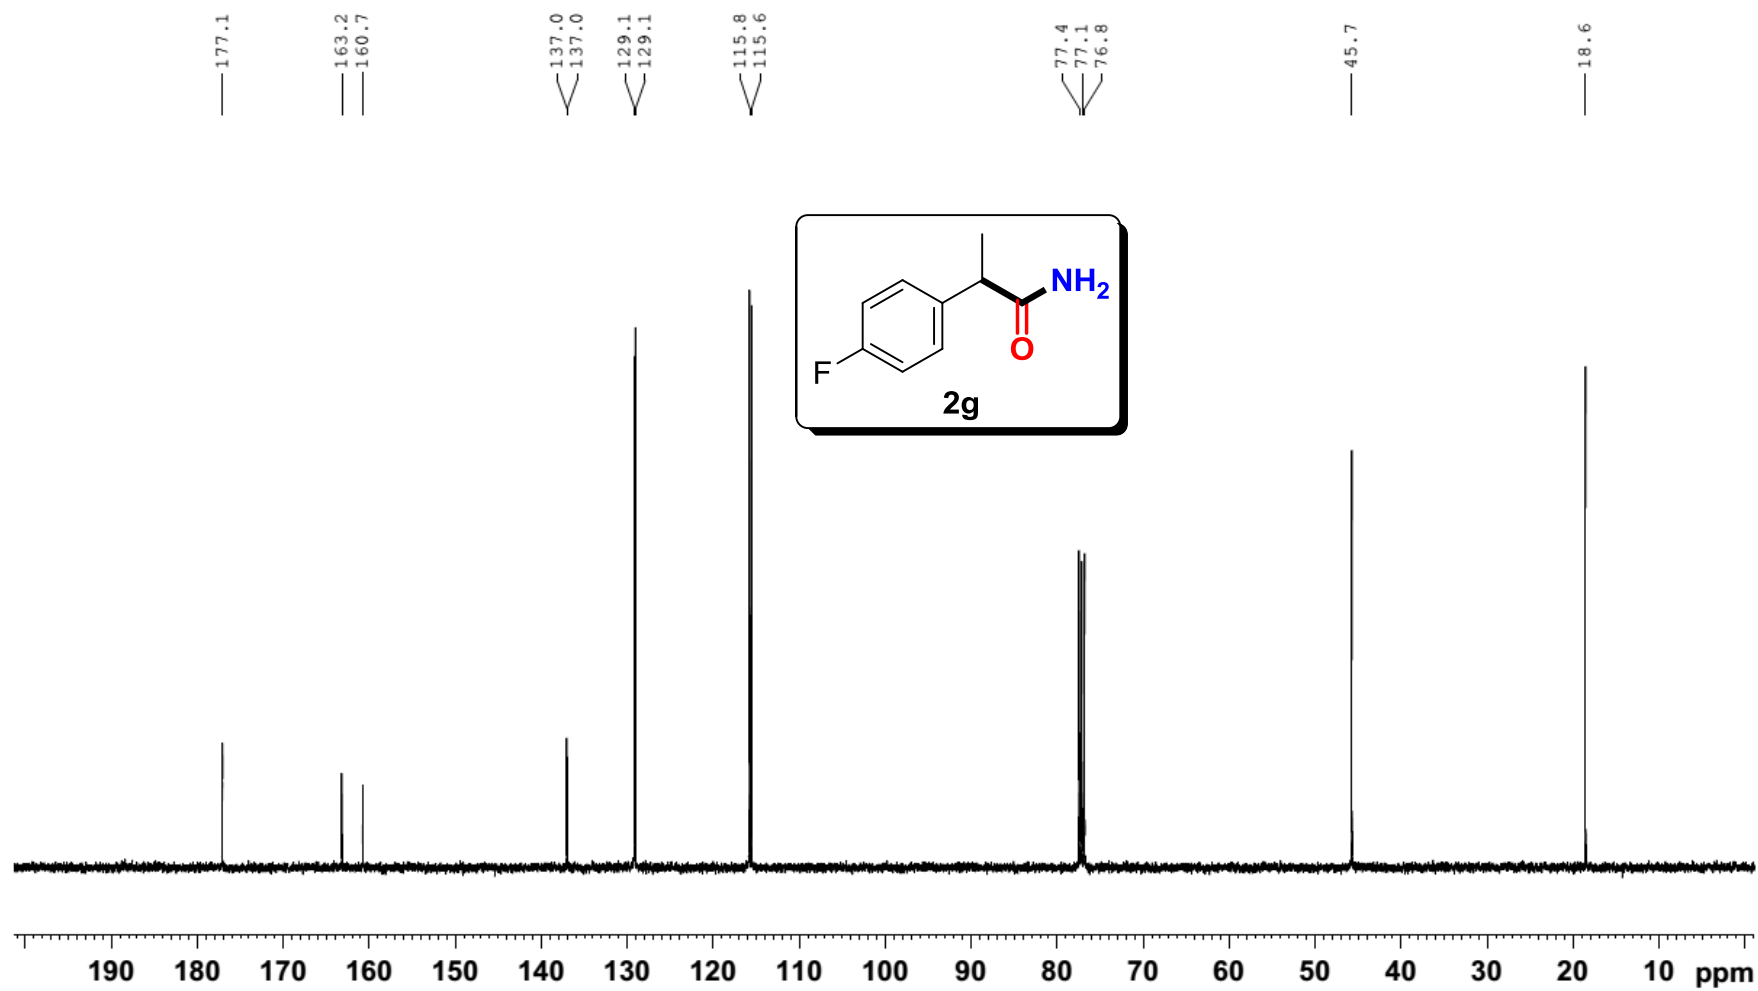

ZGY-X150929-1-FNMR

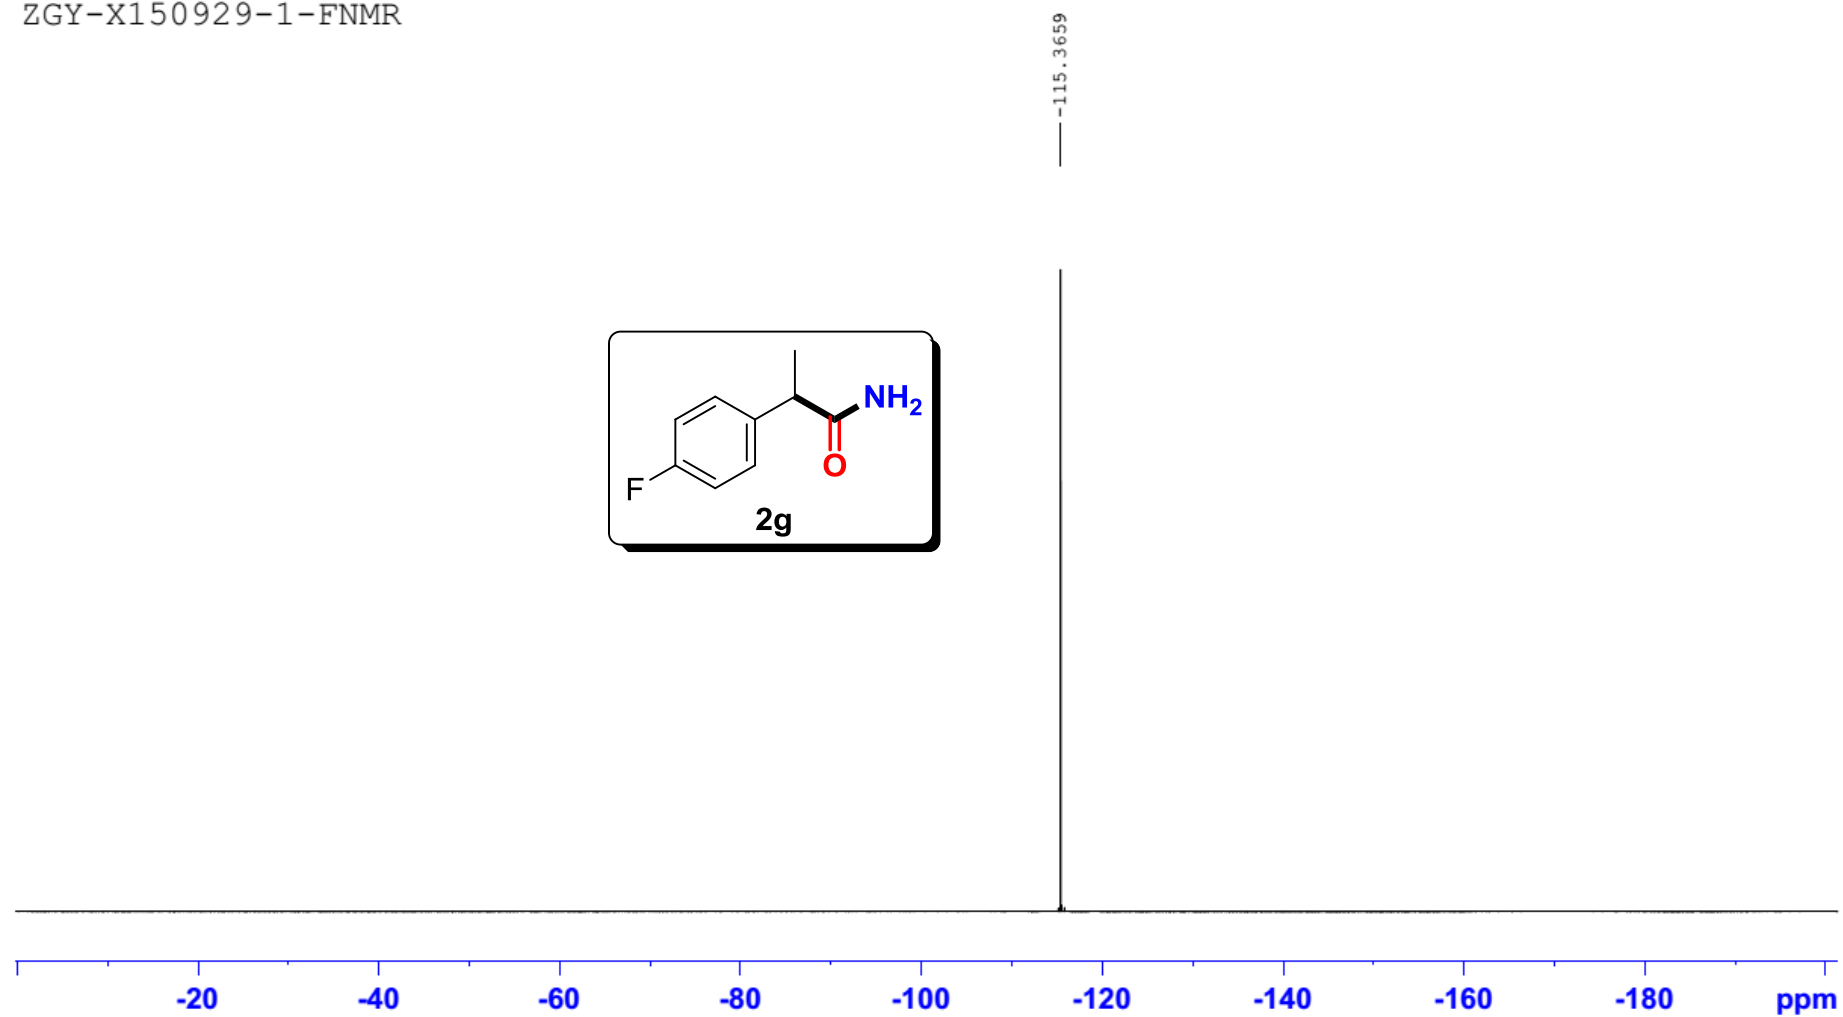

N CDC13 {E:\data} R

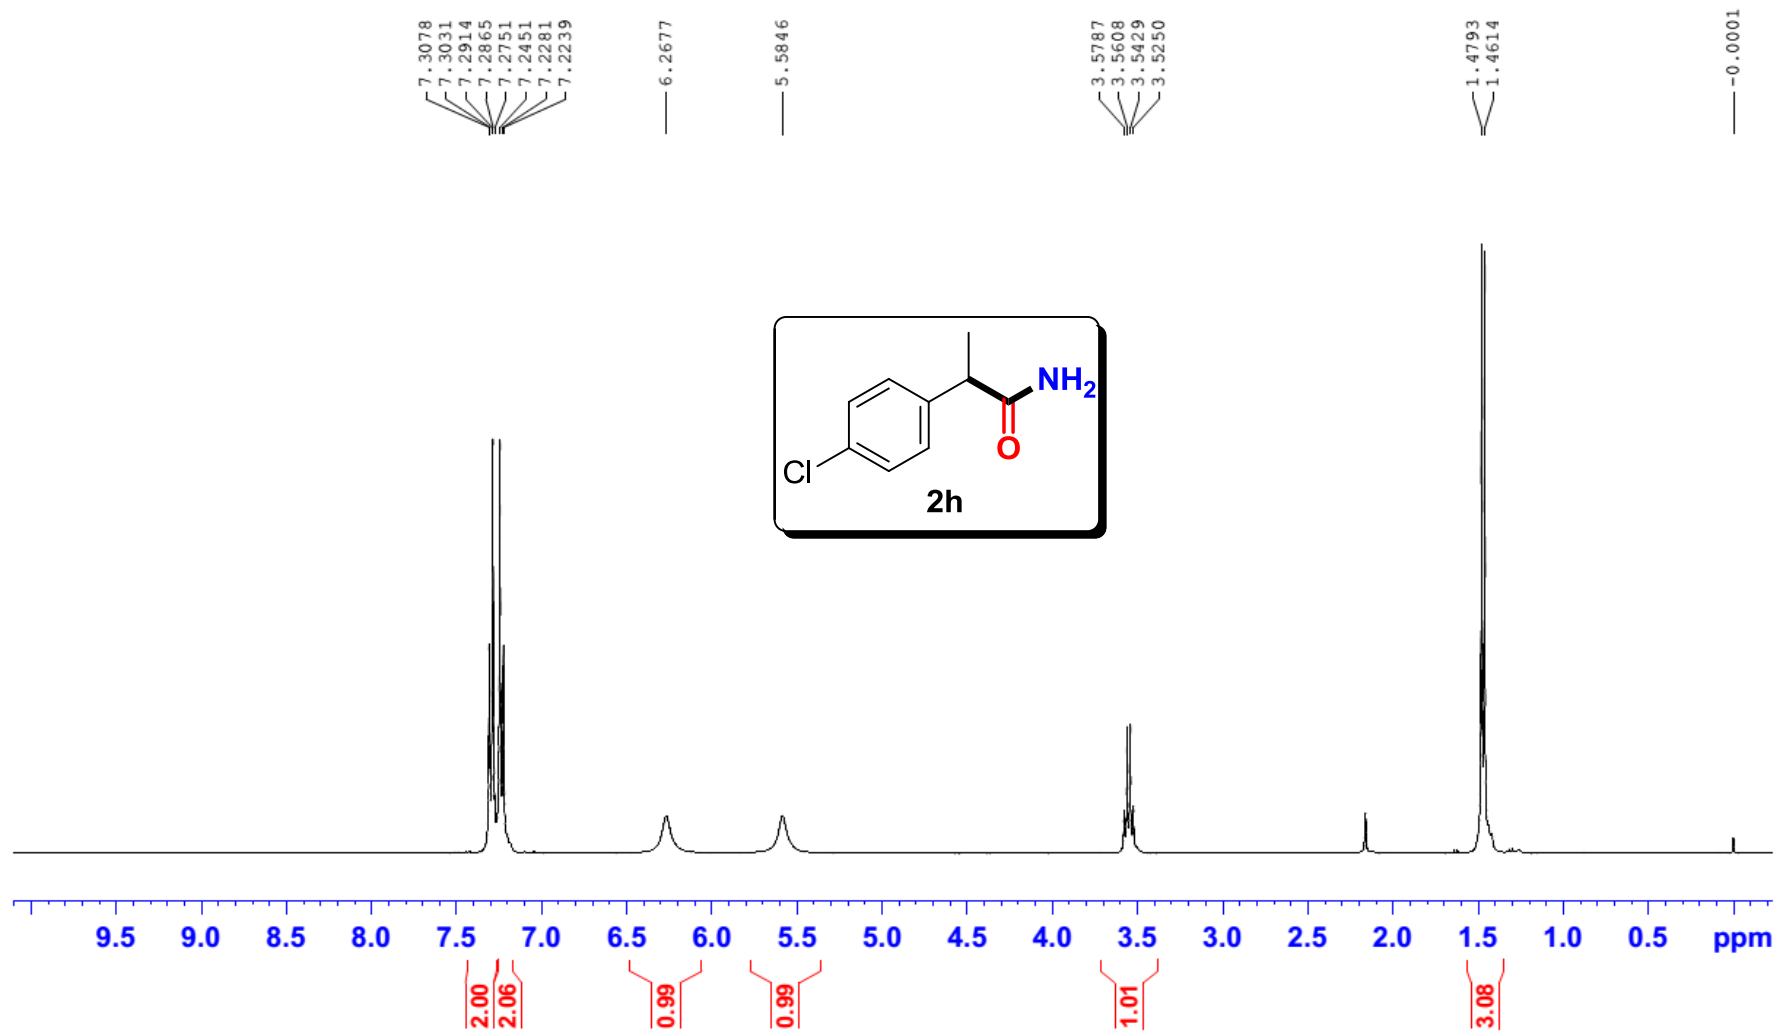



ZGY-X150923-<sup>13</sup>C-NMR

139.7

133.1

129.0

128.9

77.4

77.1

76.8

45.9

18.5

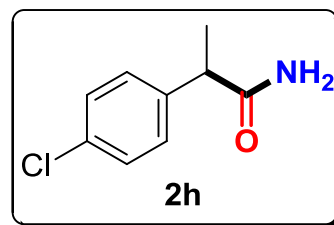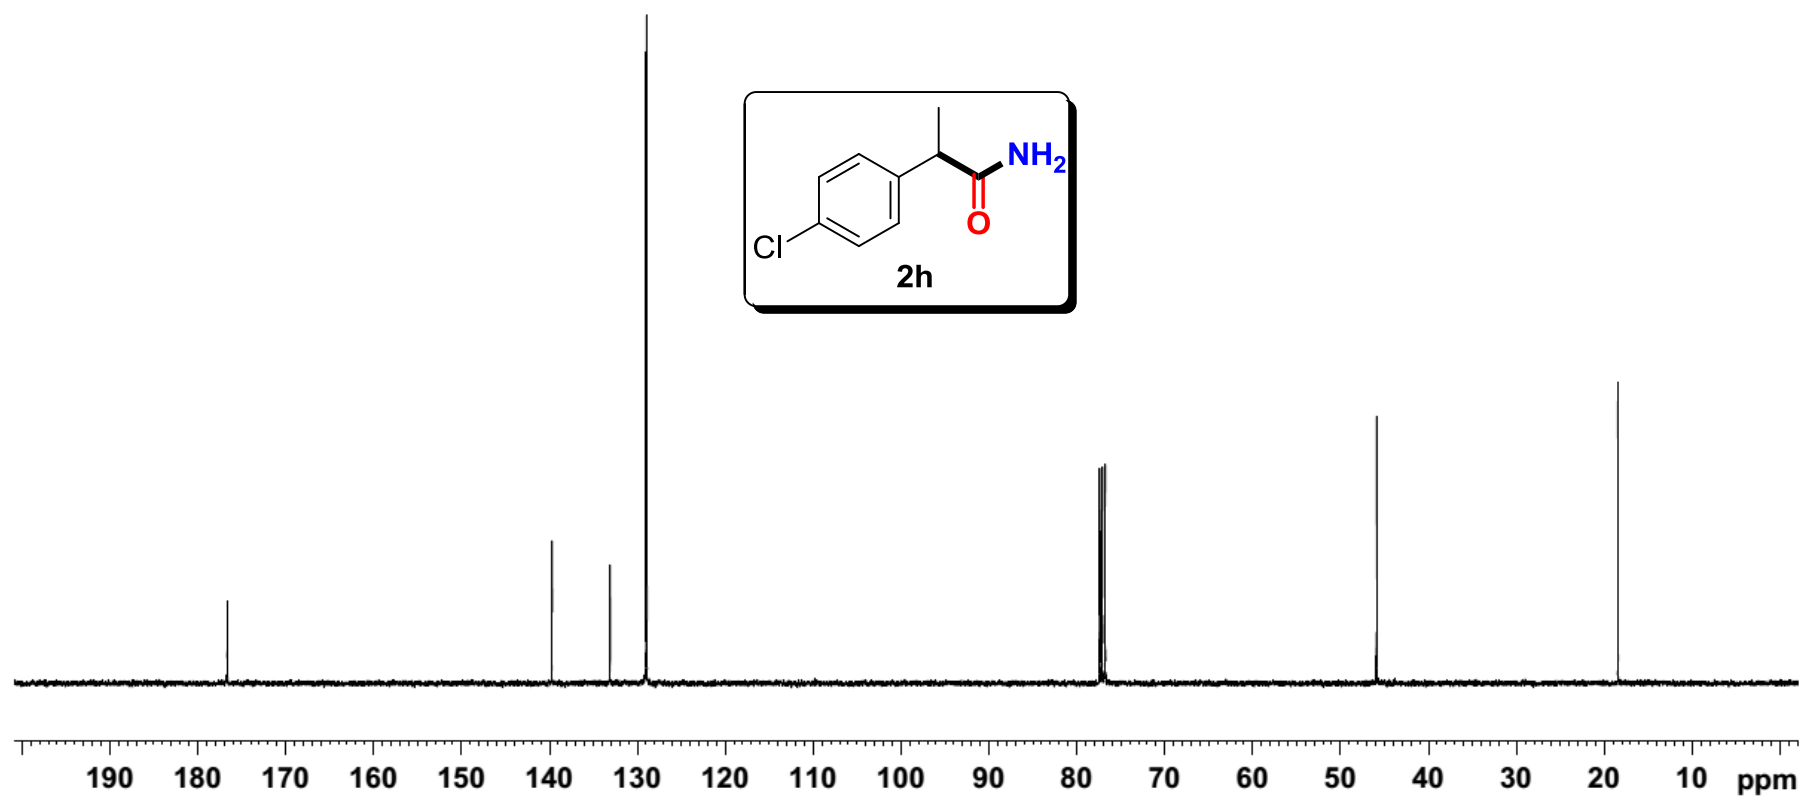

ZGY-X15X15-1-HNMR

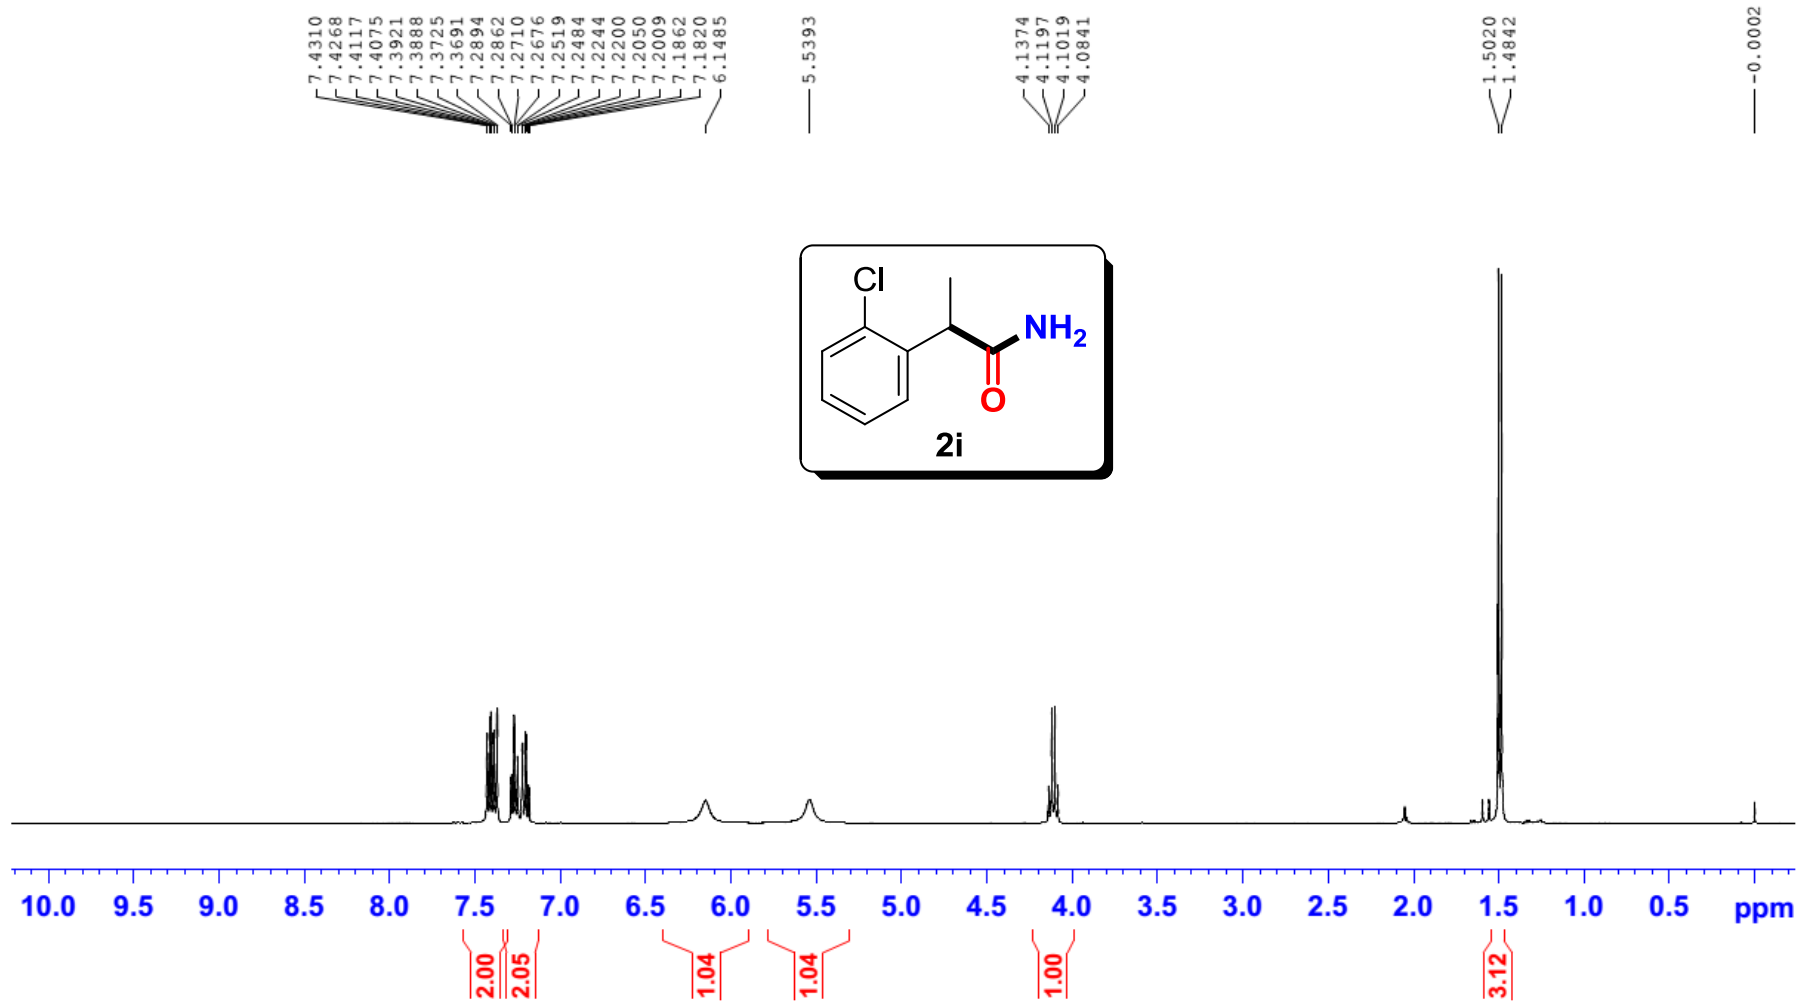

ZGY-X15X15-1-CNMR

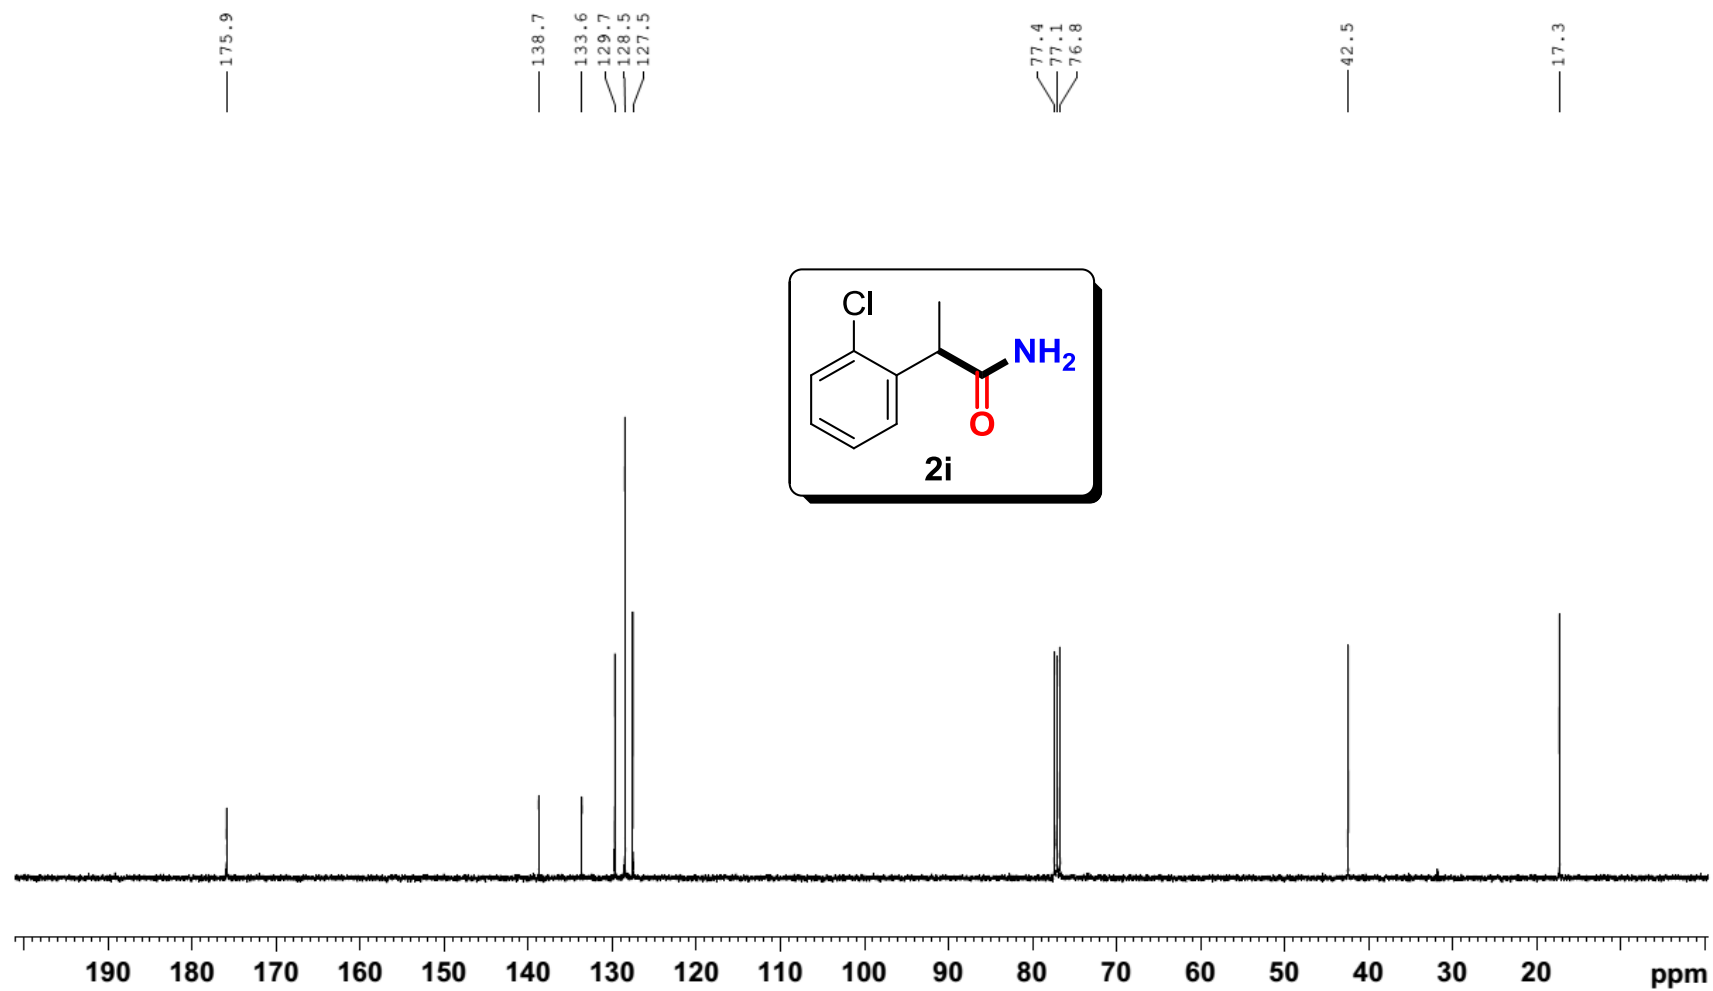

ZJP-X160113-1-HNMR

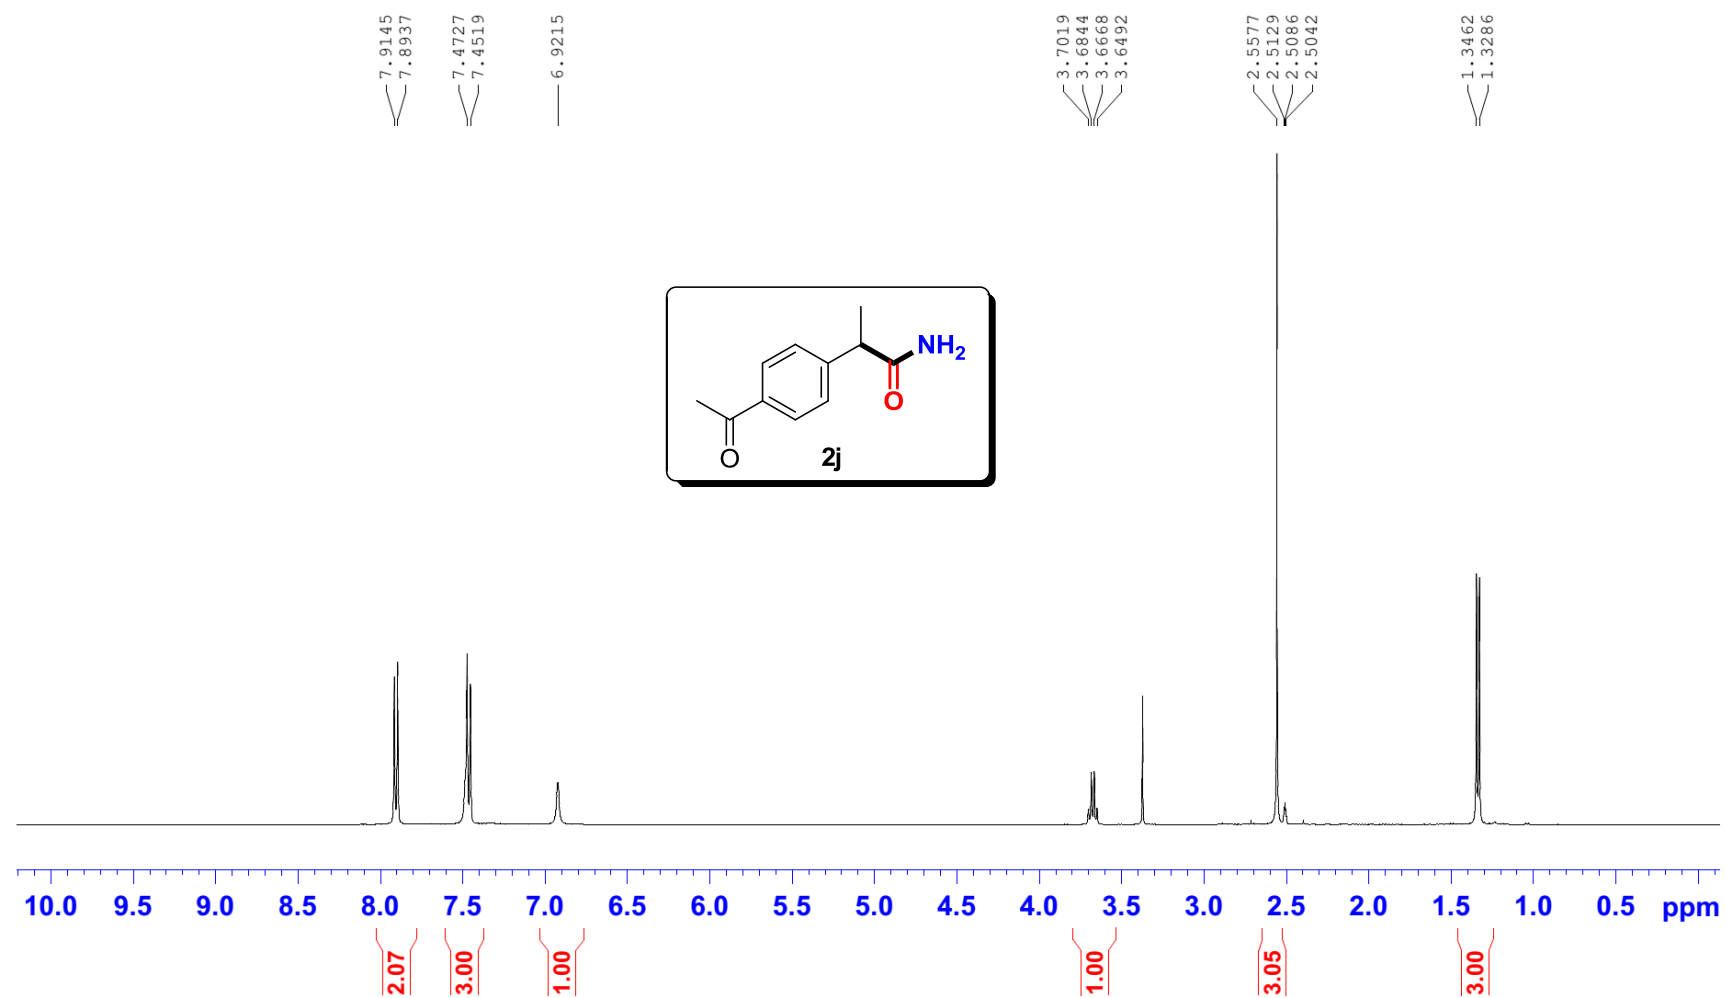

ZJP-X160113-1-CNMR

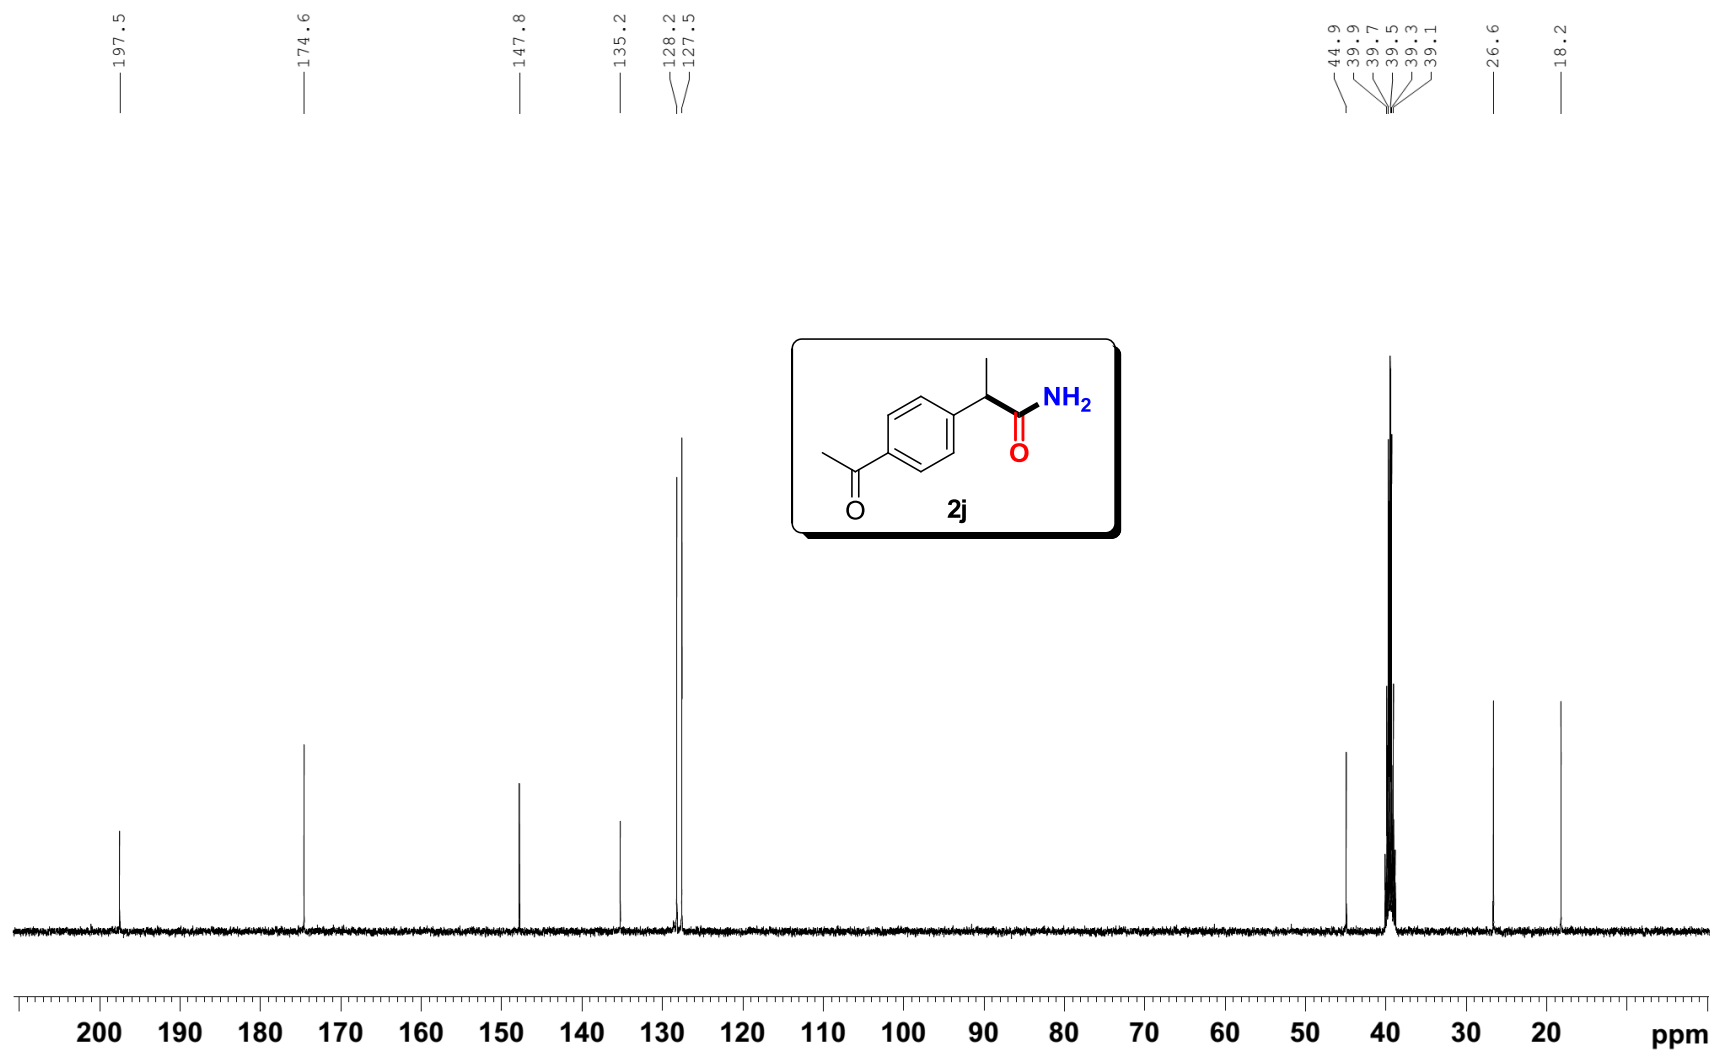

ZGY-X150930-1-HNMR

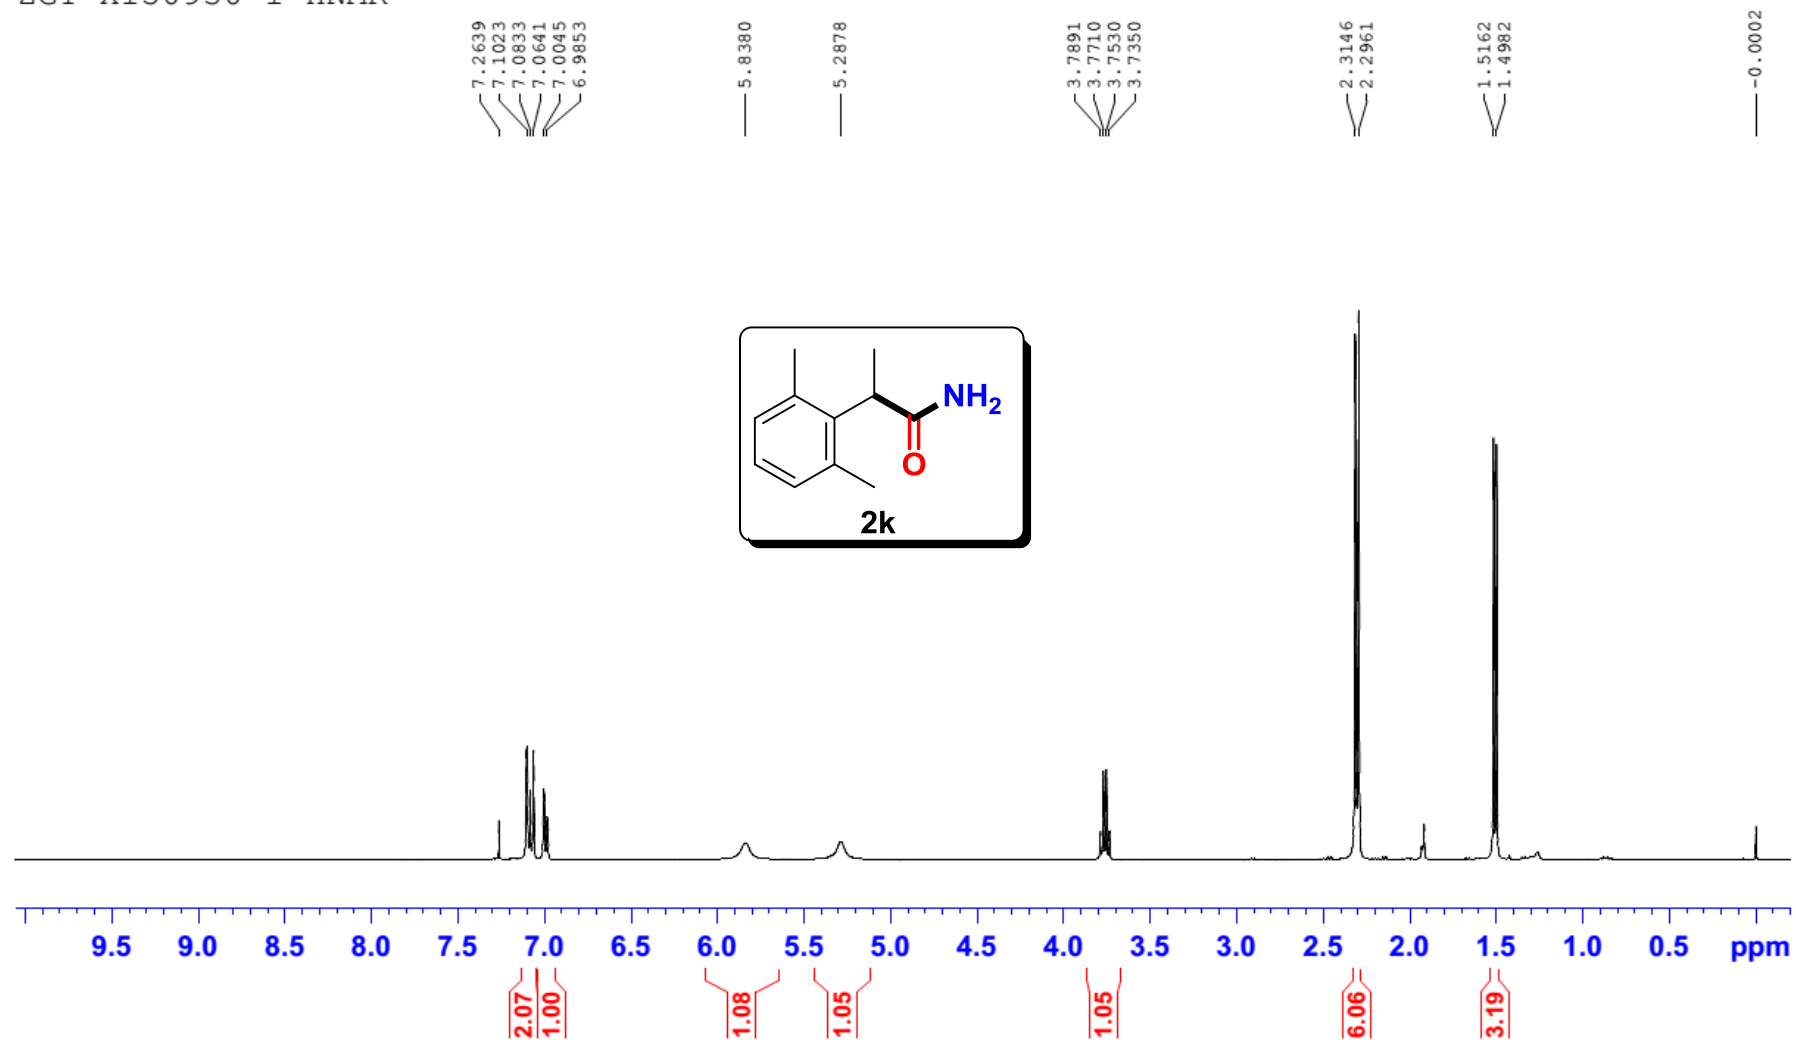

ZGY-X150930-1-CNMR

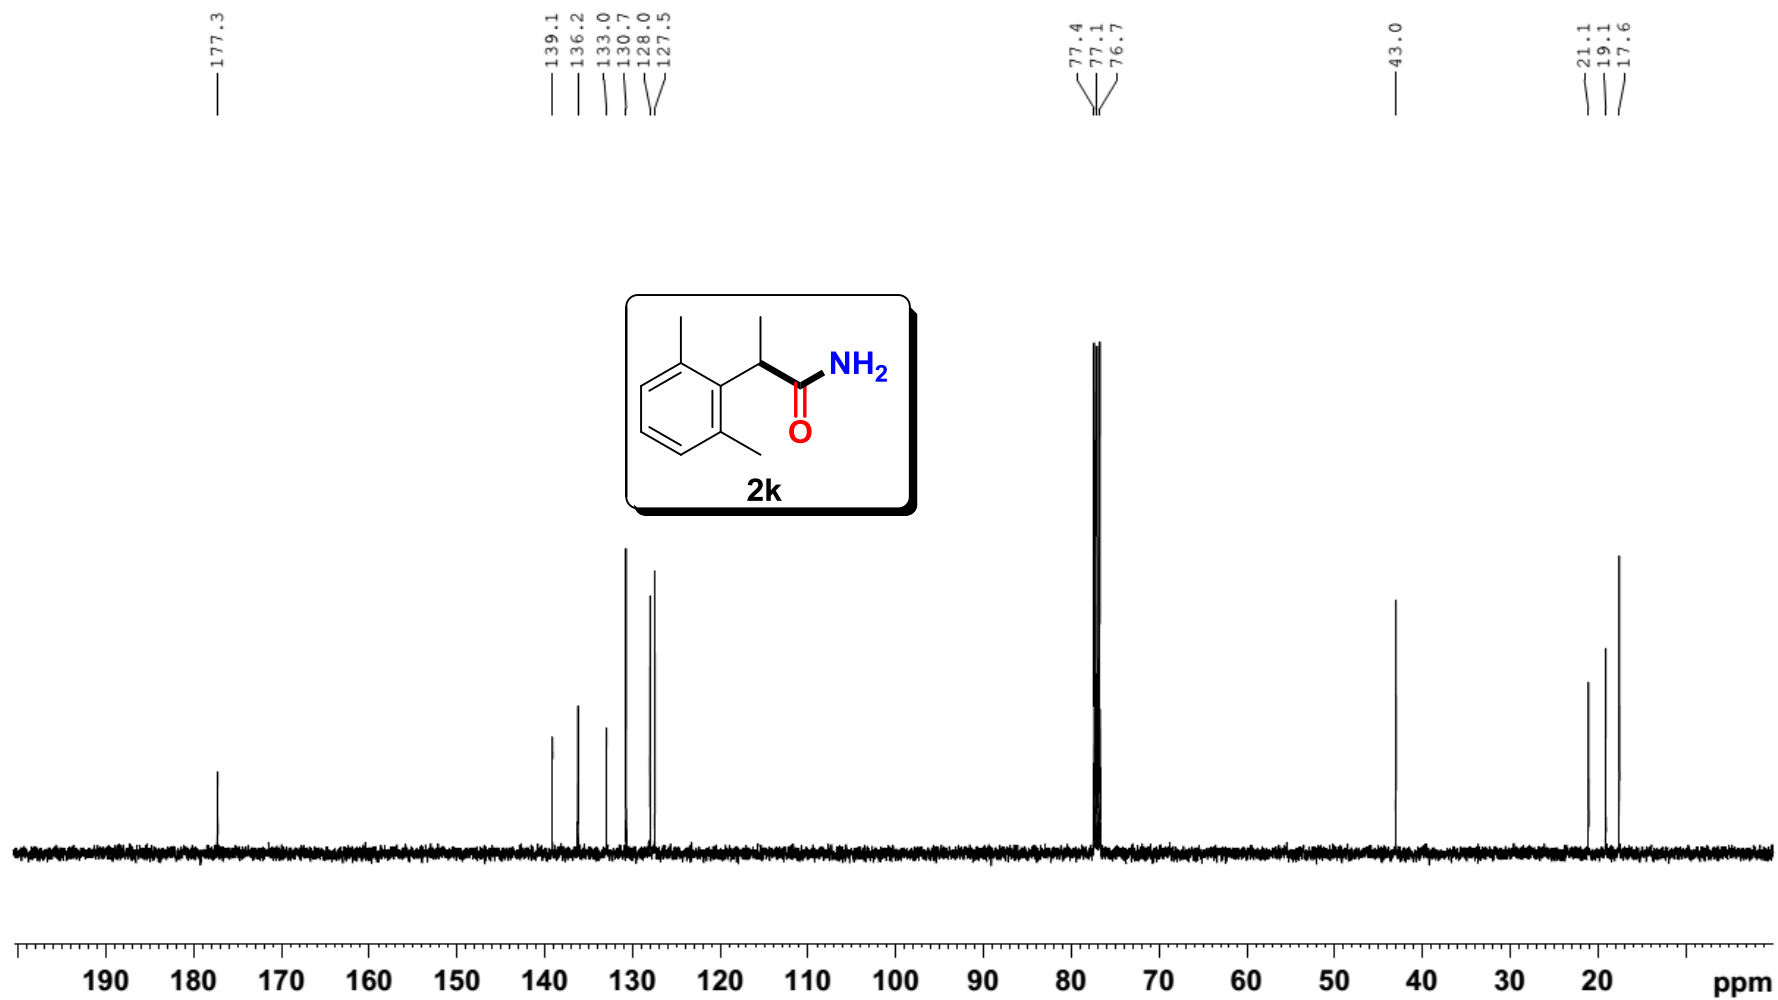

ZGY-X150927-4-HNMR

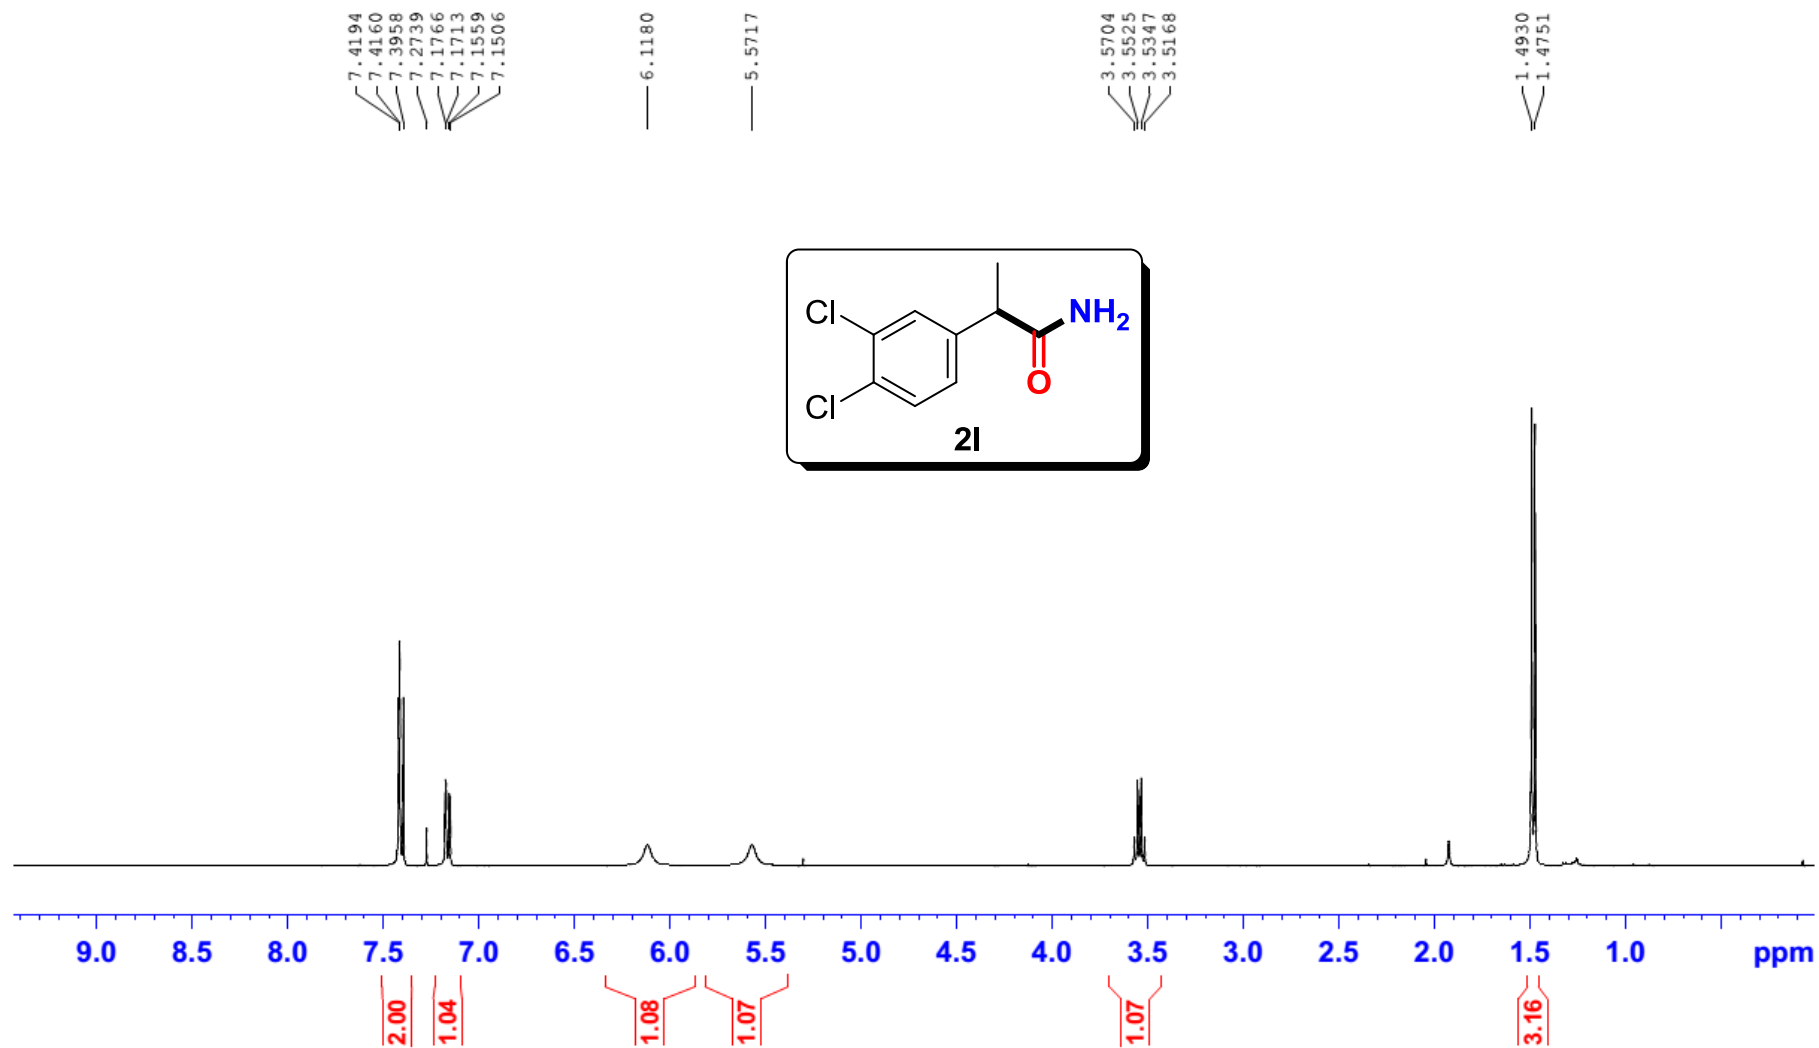



ZGY-X150927-4-CNMR

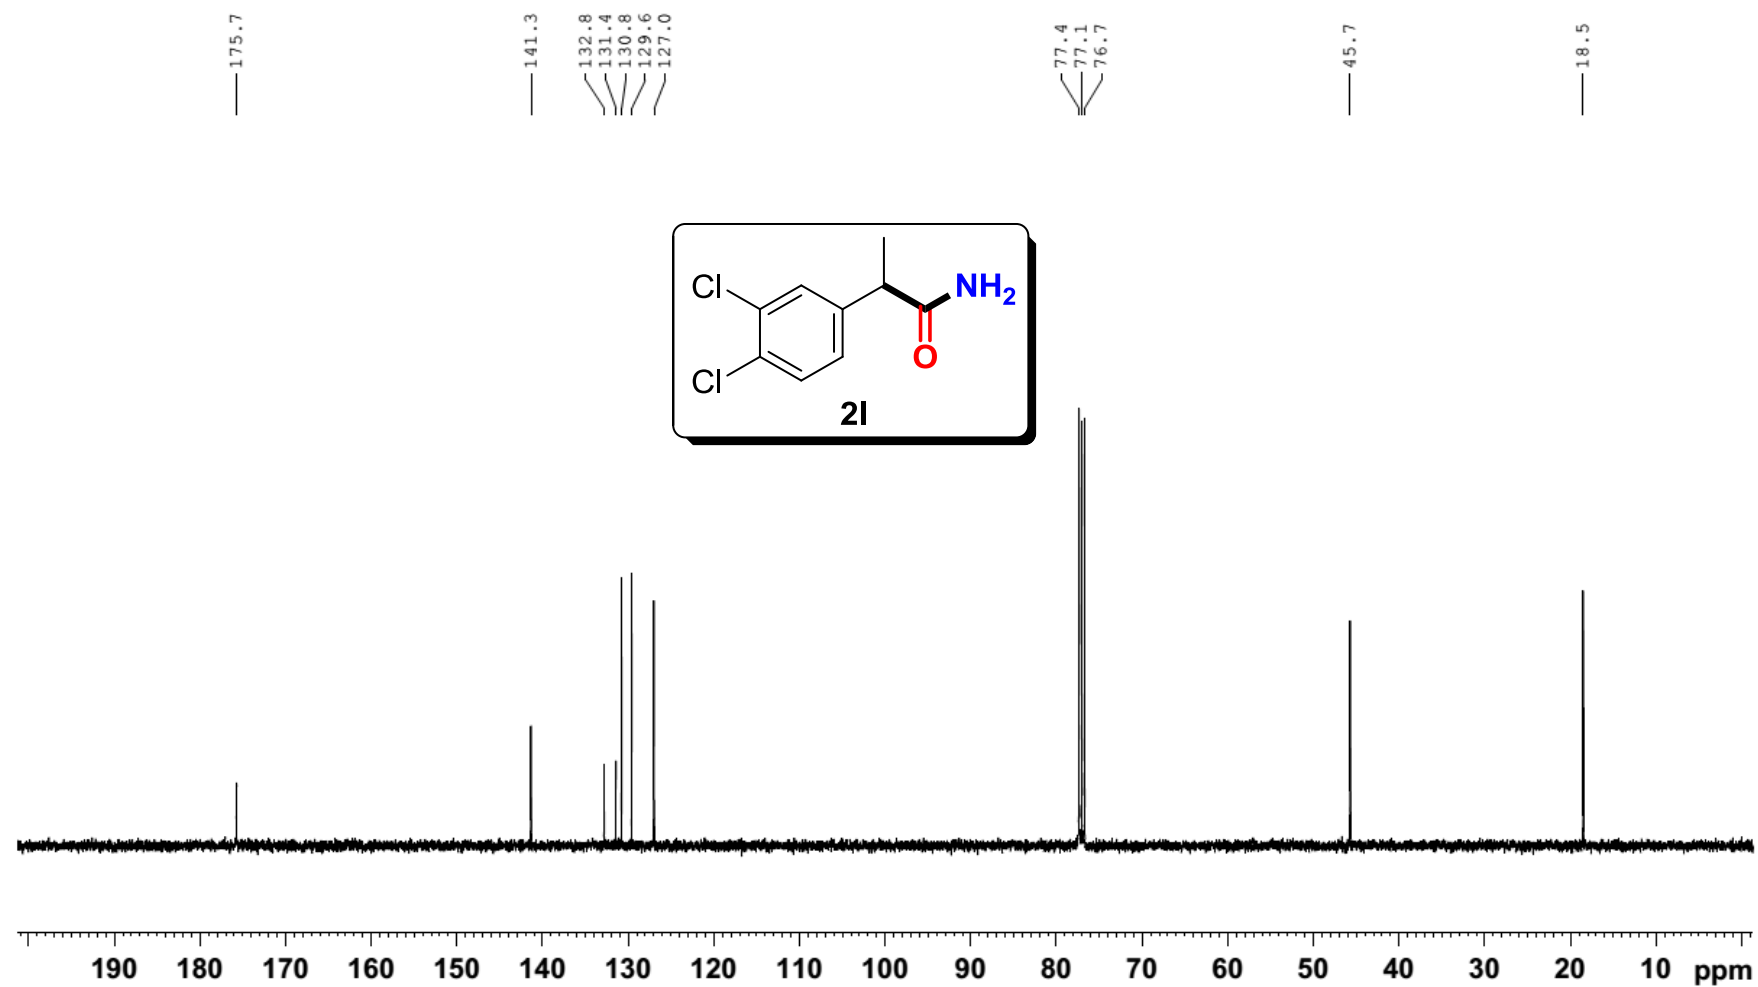

ZGY-X15X28-3-HNMR

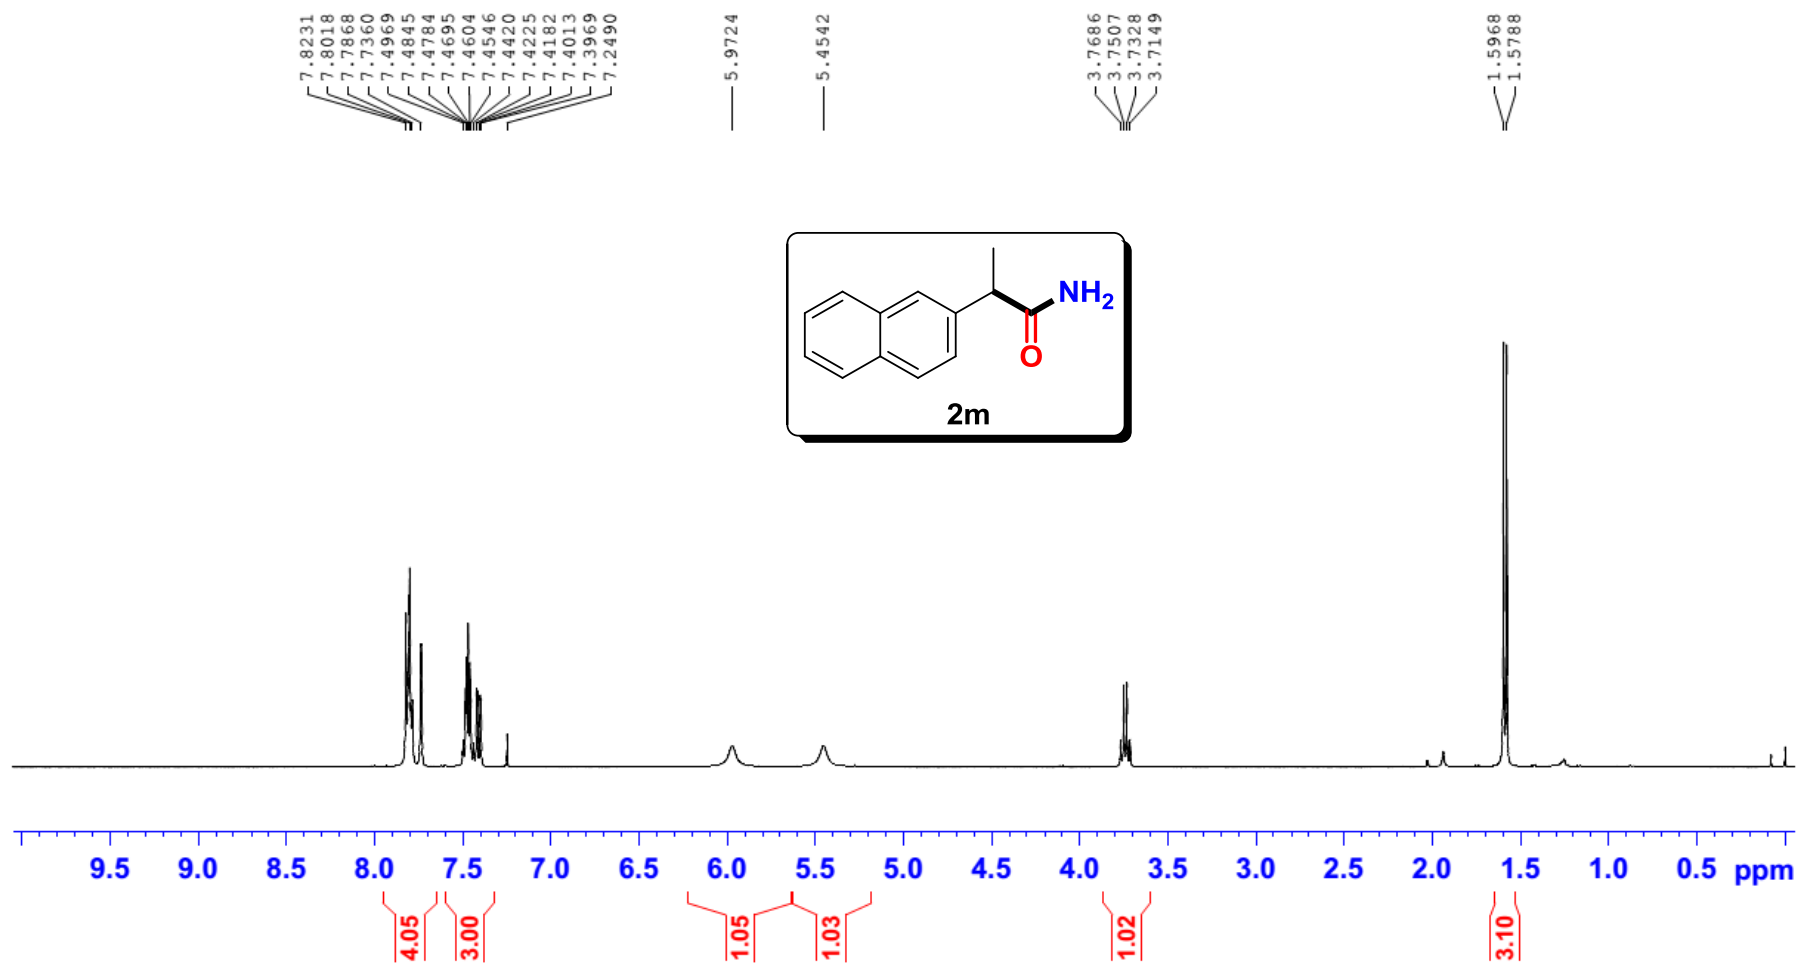

ZGY-X15X28-3-CNMR

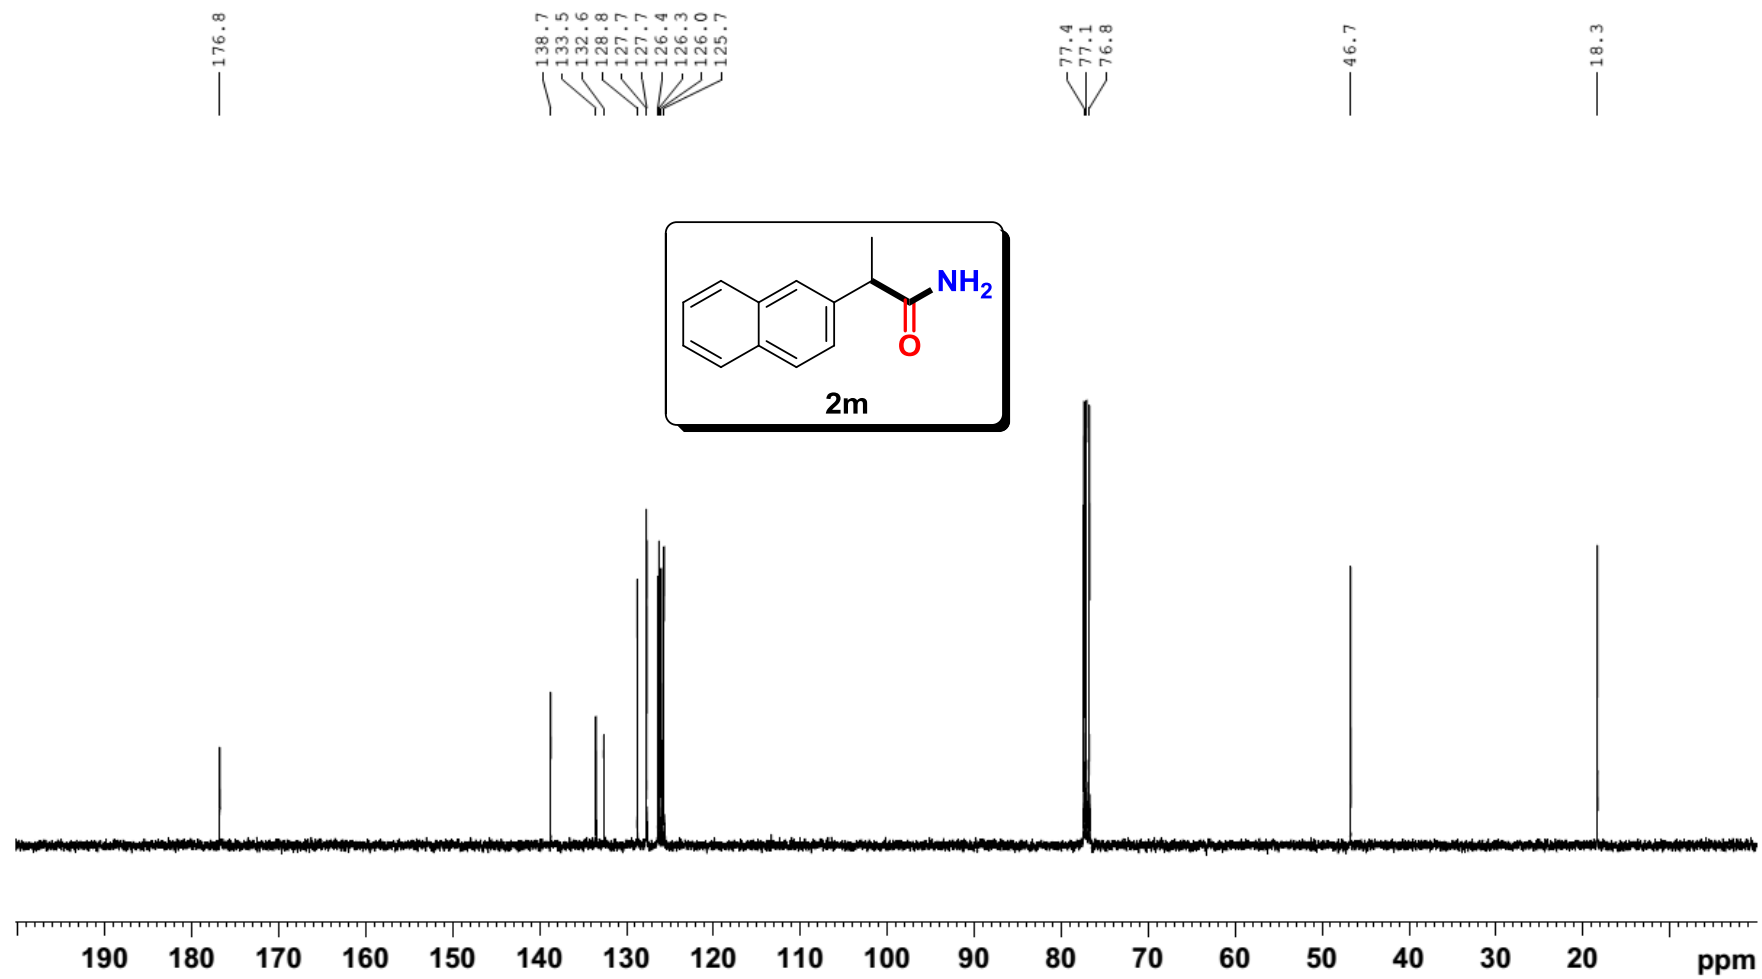

ZGY-X15X19-1-HNMR

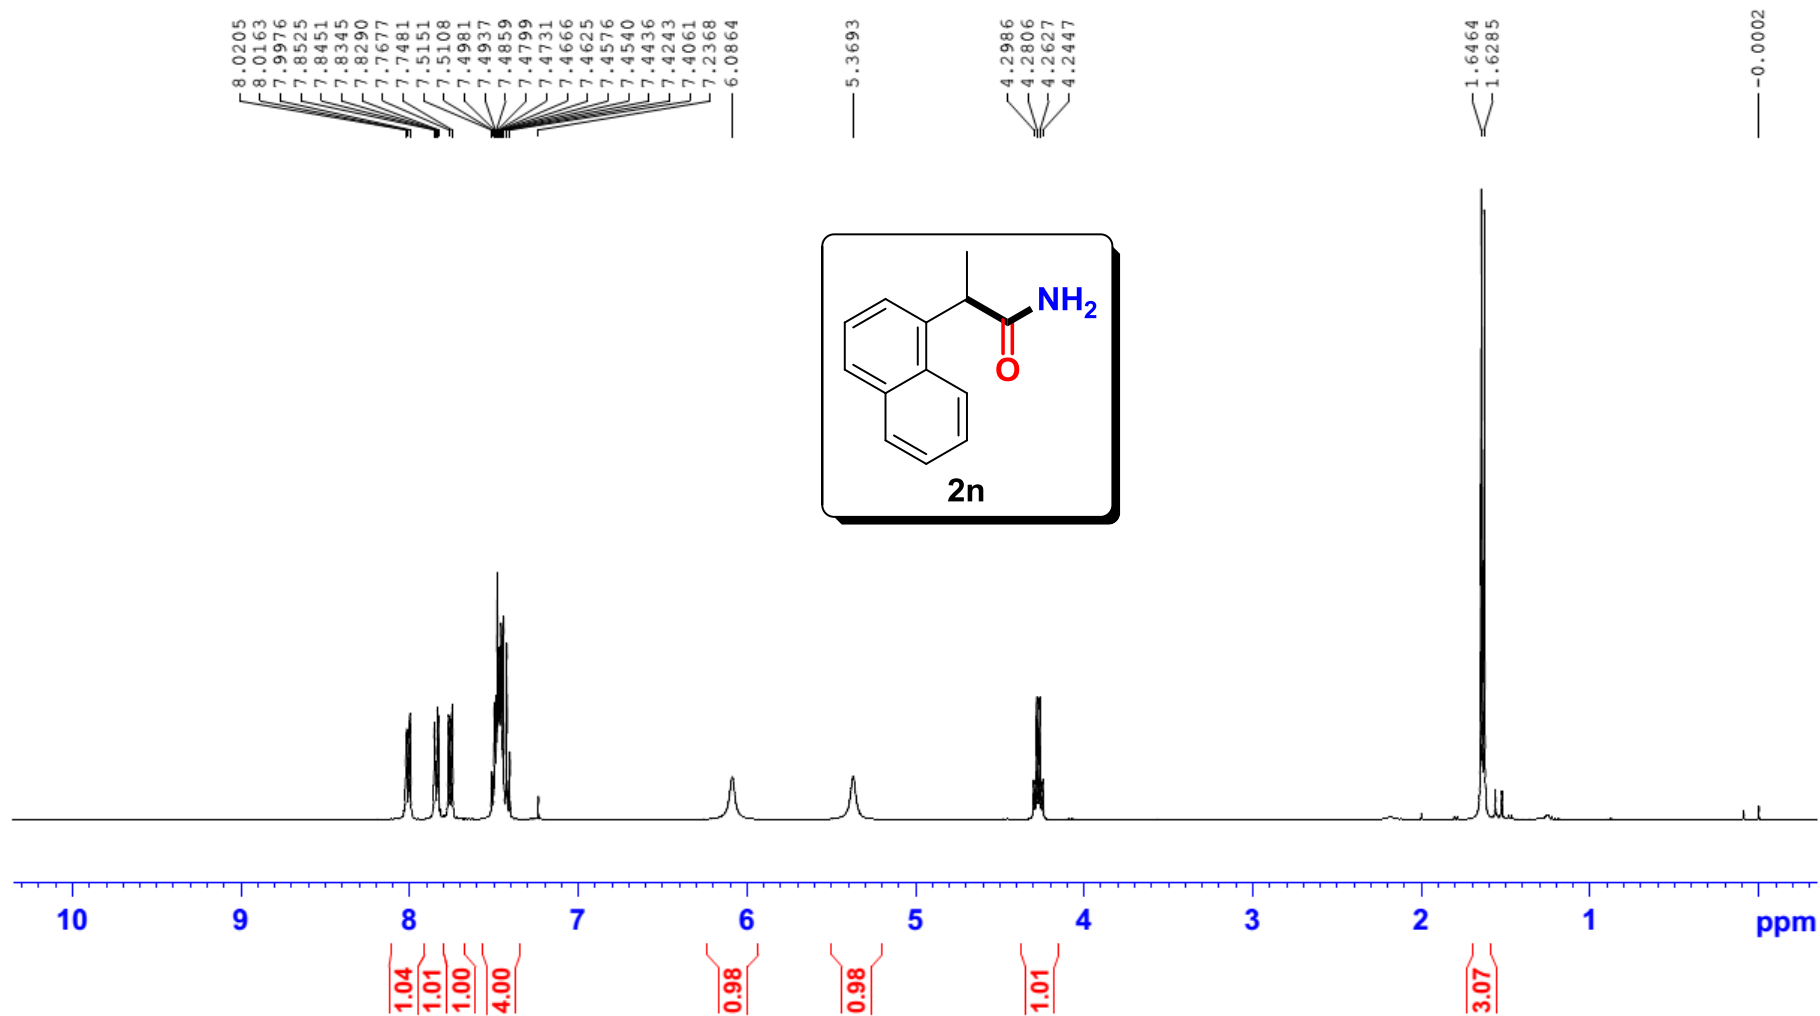

ZGY-X15X19-1-CNMR

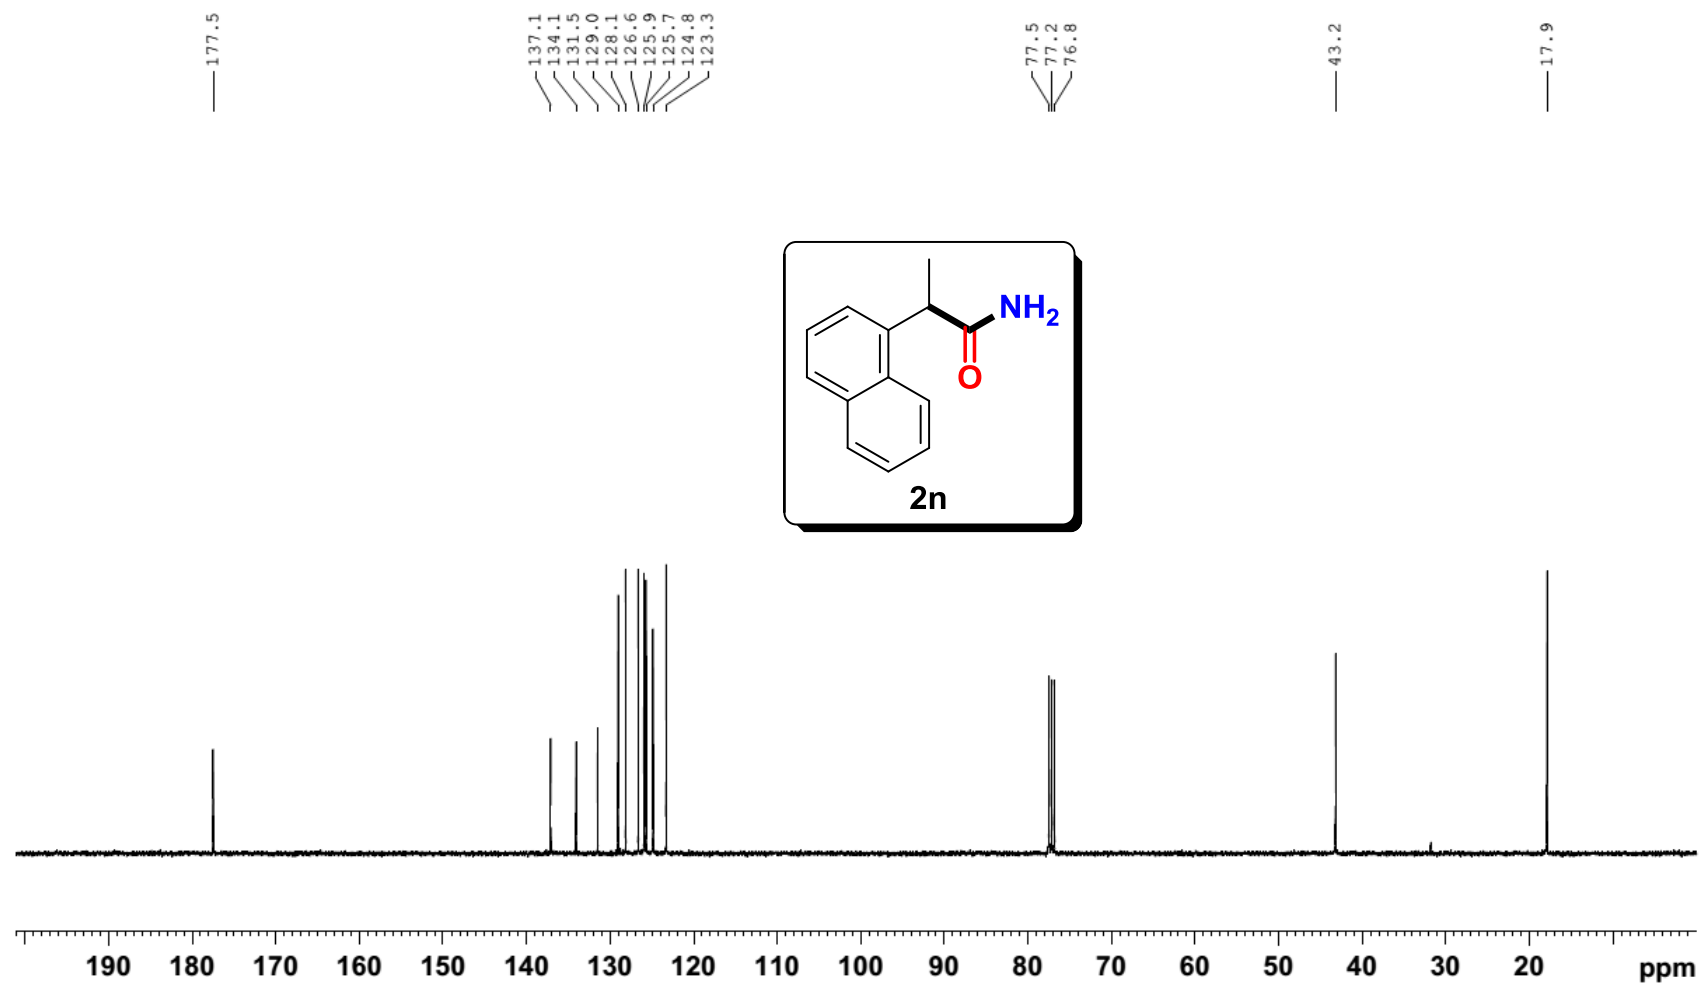

ZGY-X150930-3-HNMR

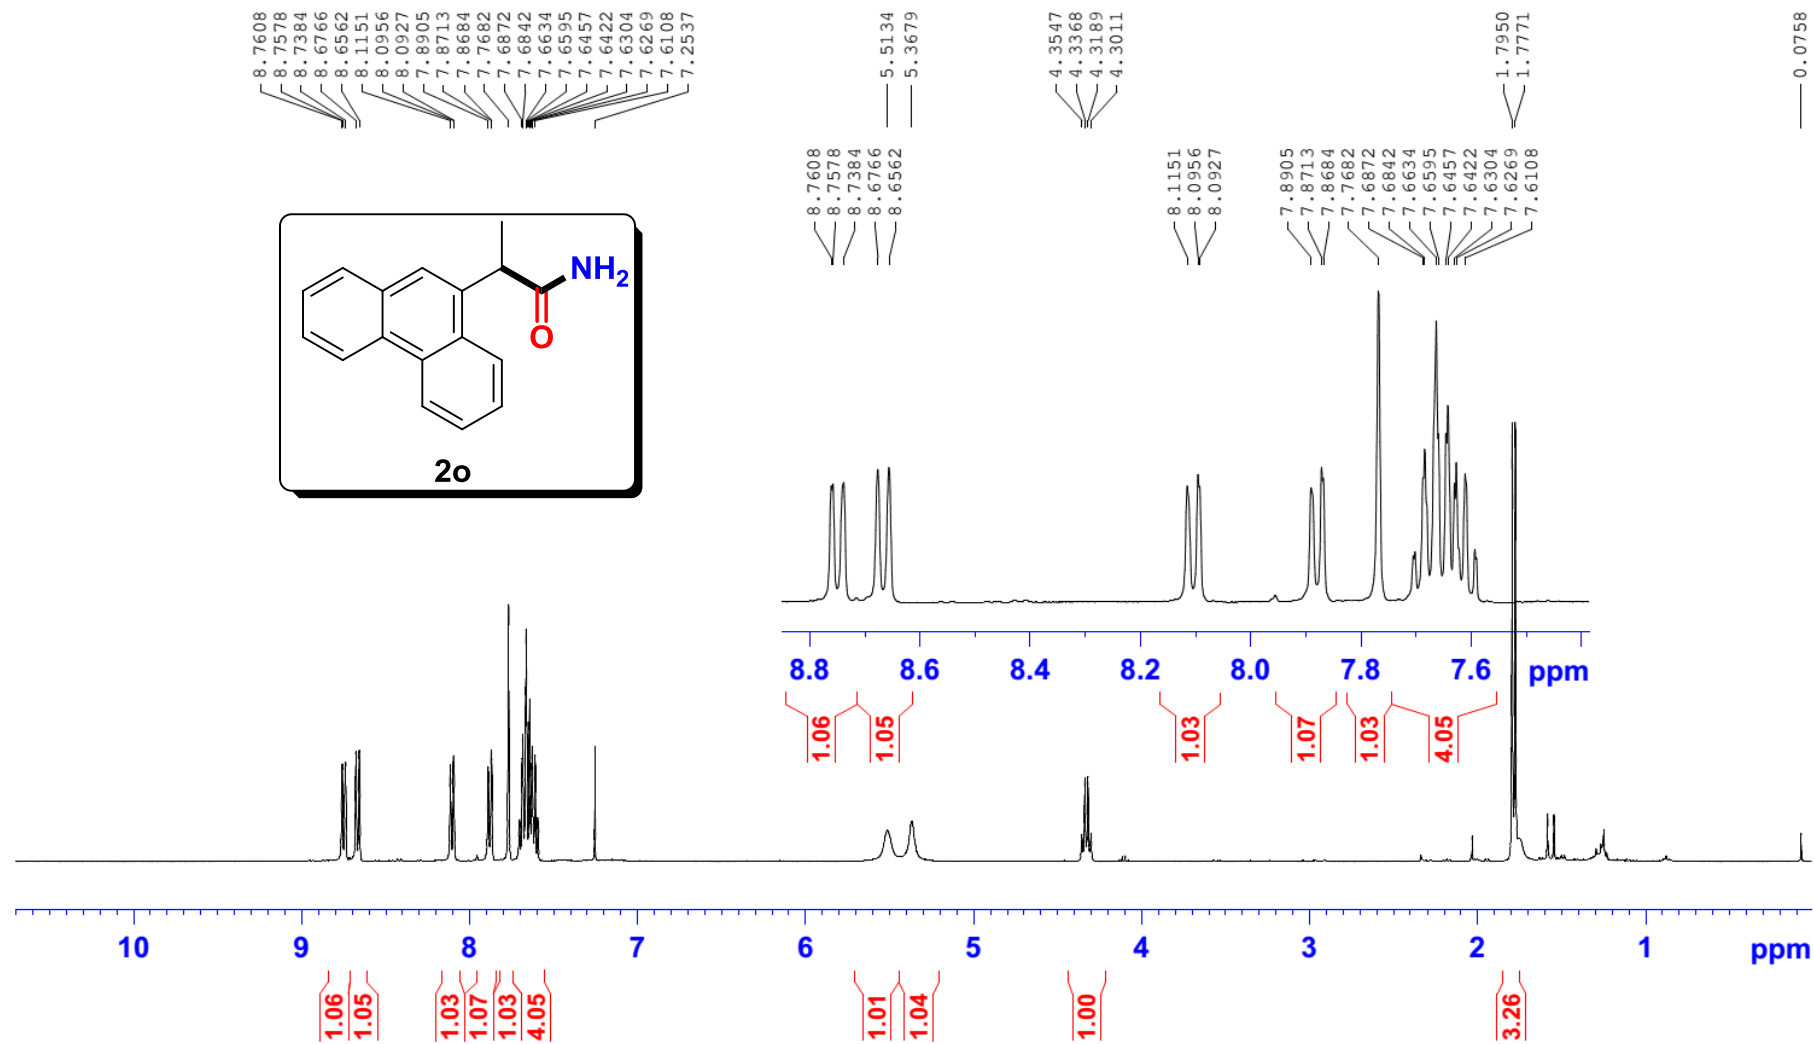

ZGY-X150930-3-CNMR

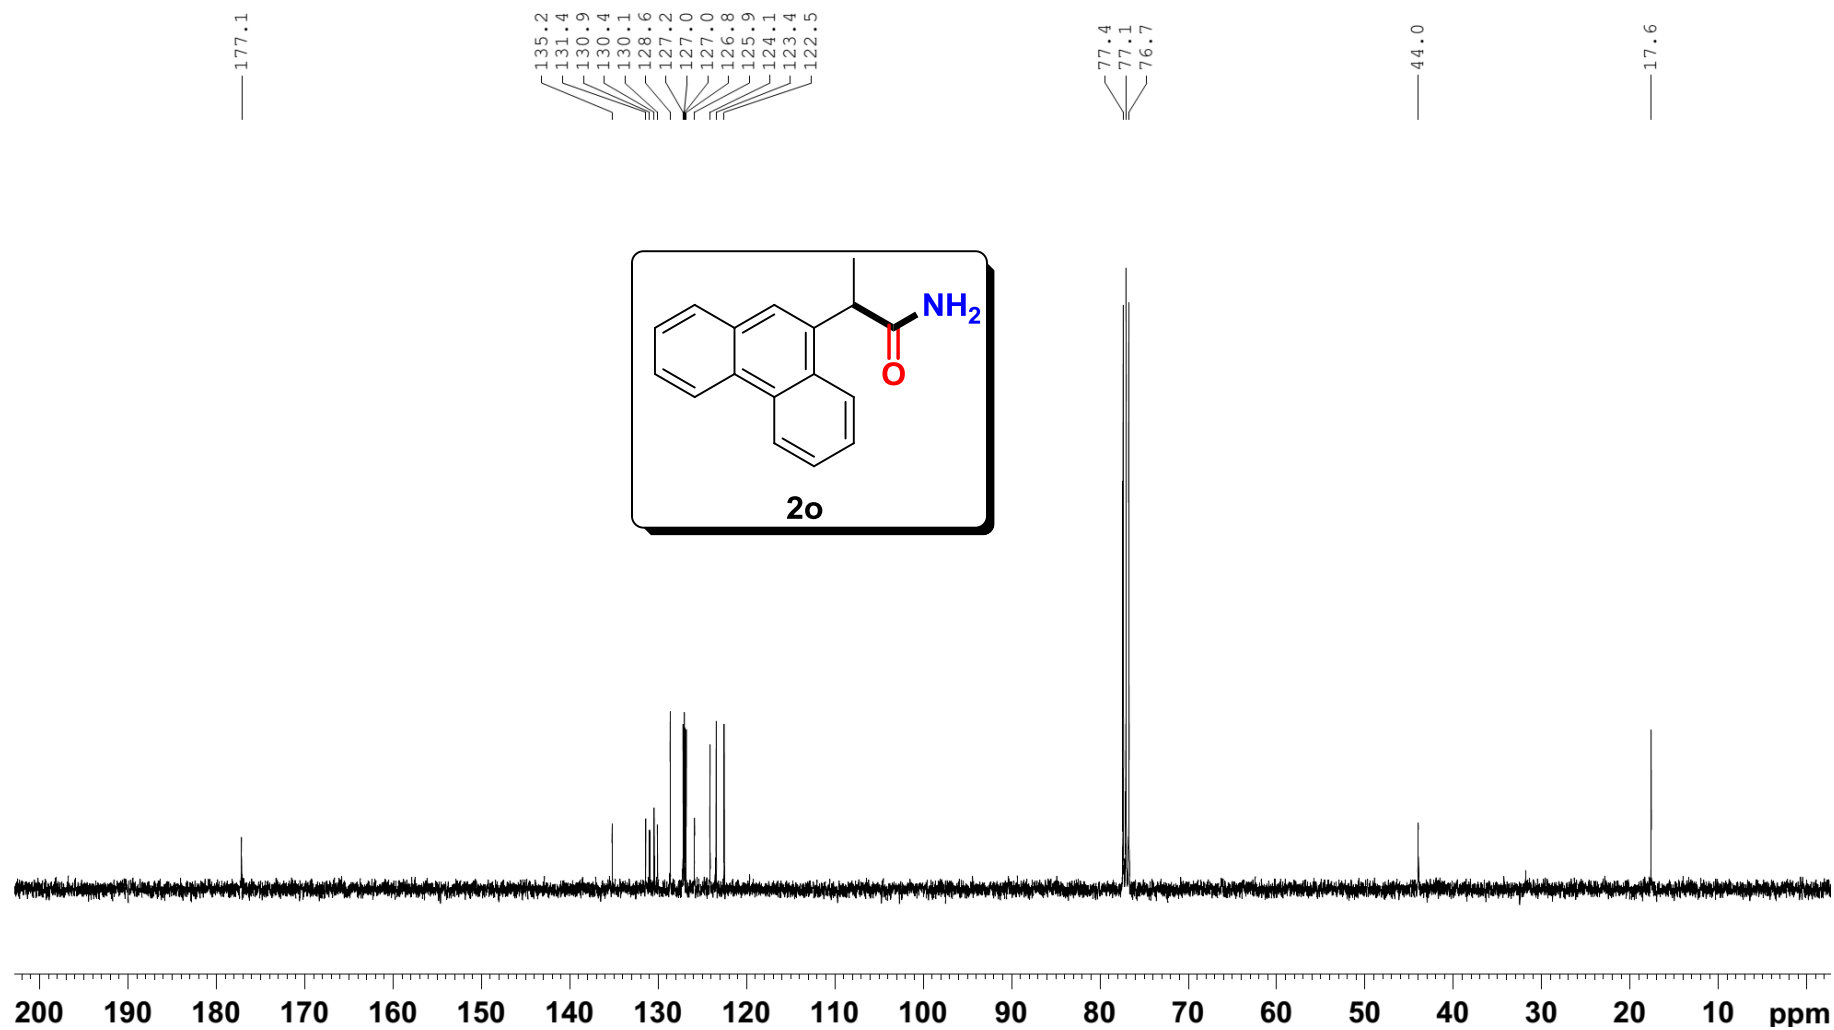

GB-X170220-1-2-HNMR

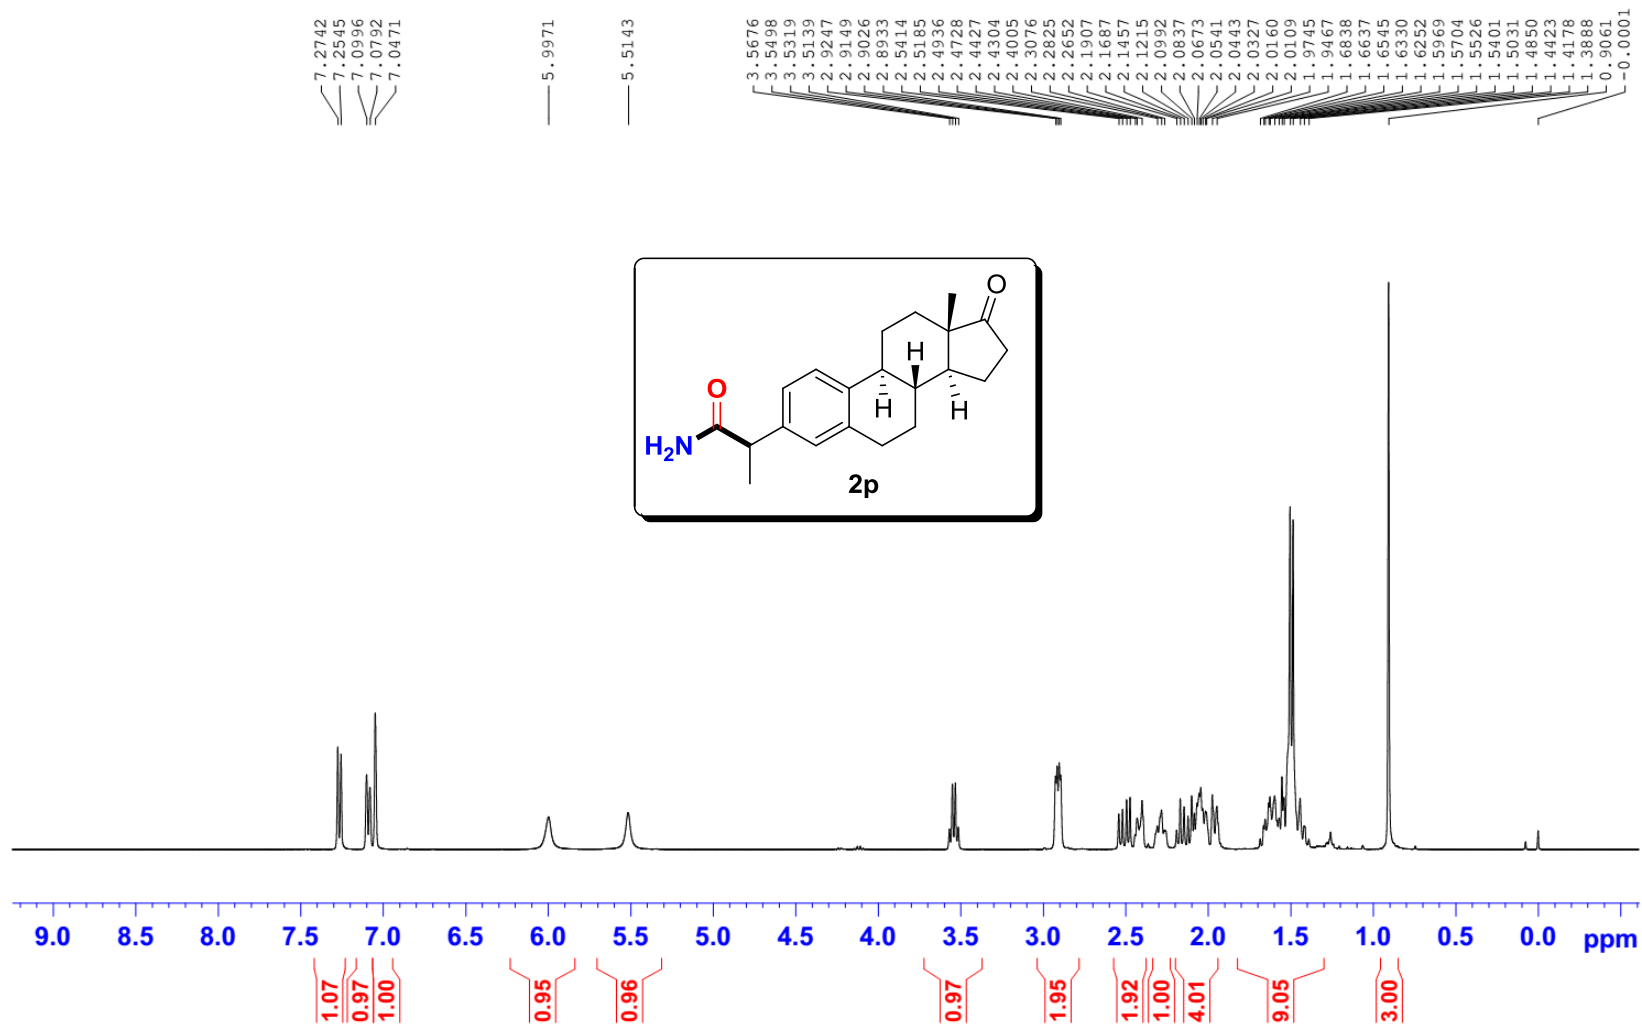



GB-X170220-1-2-CNMR

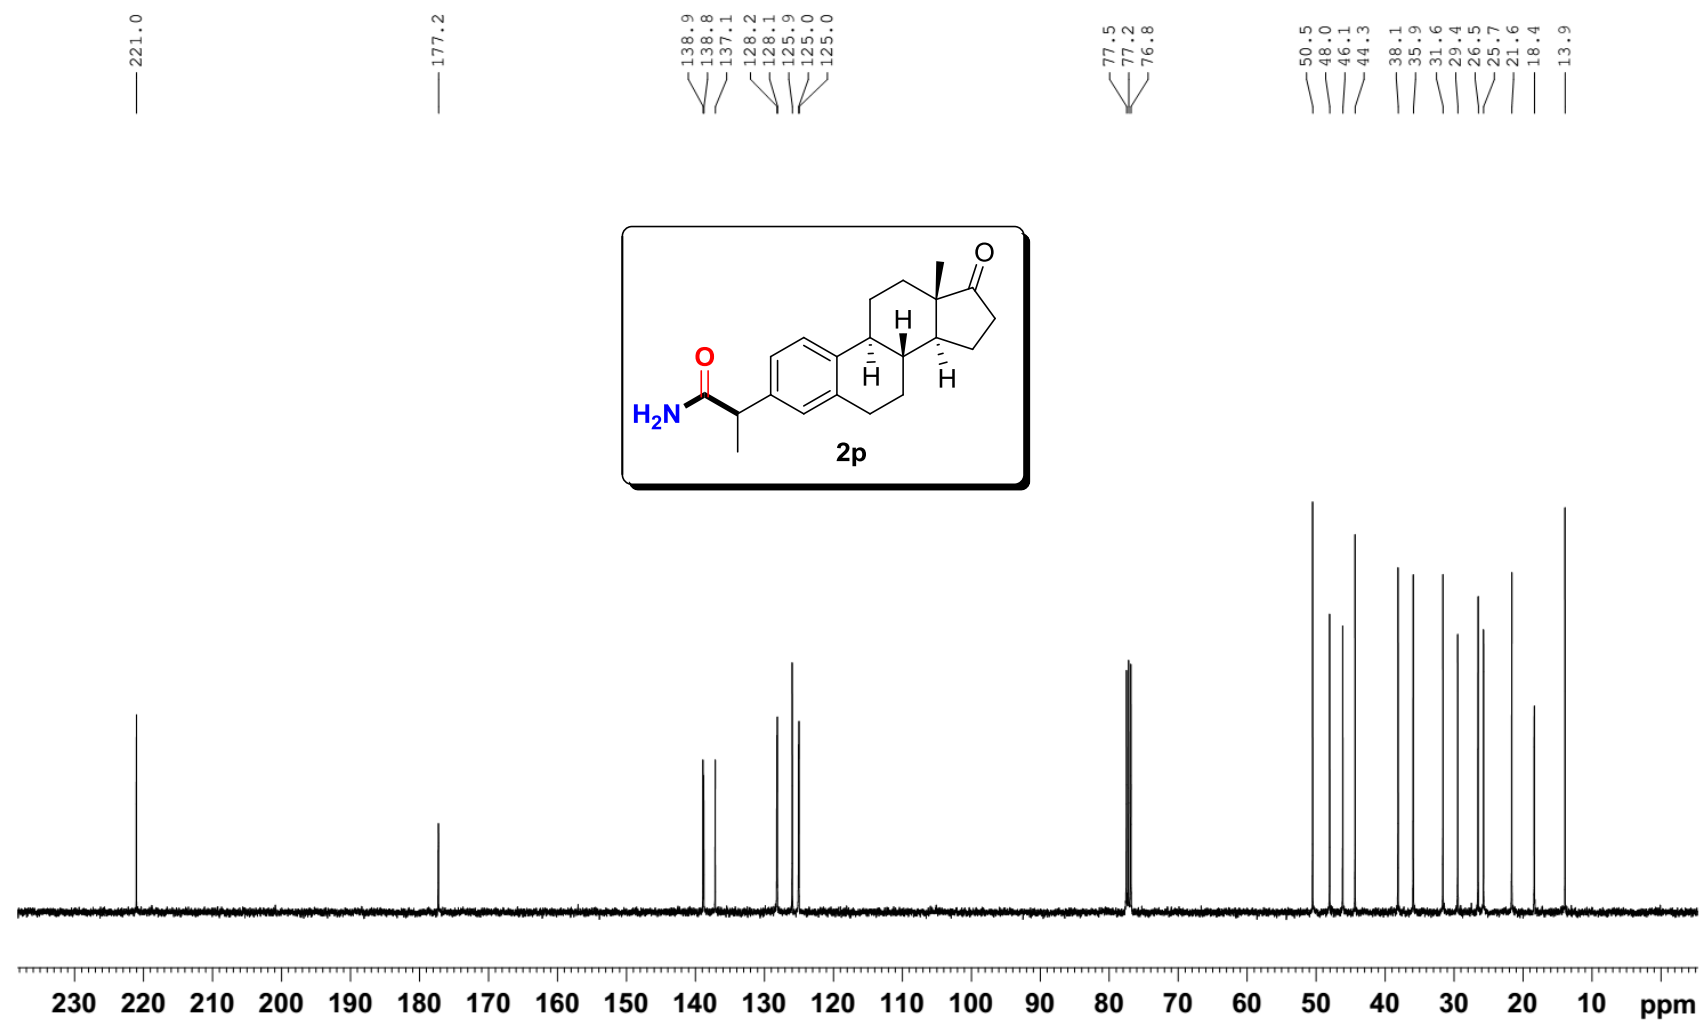

ZGY-X15X07-2-HNMR

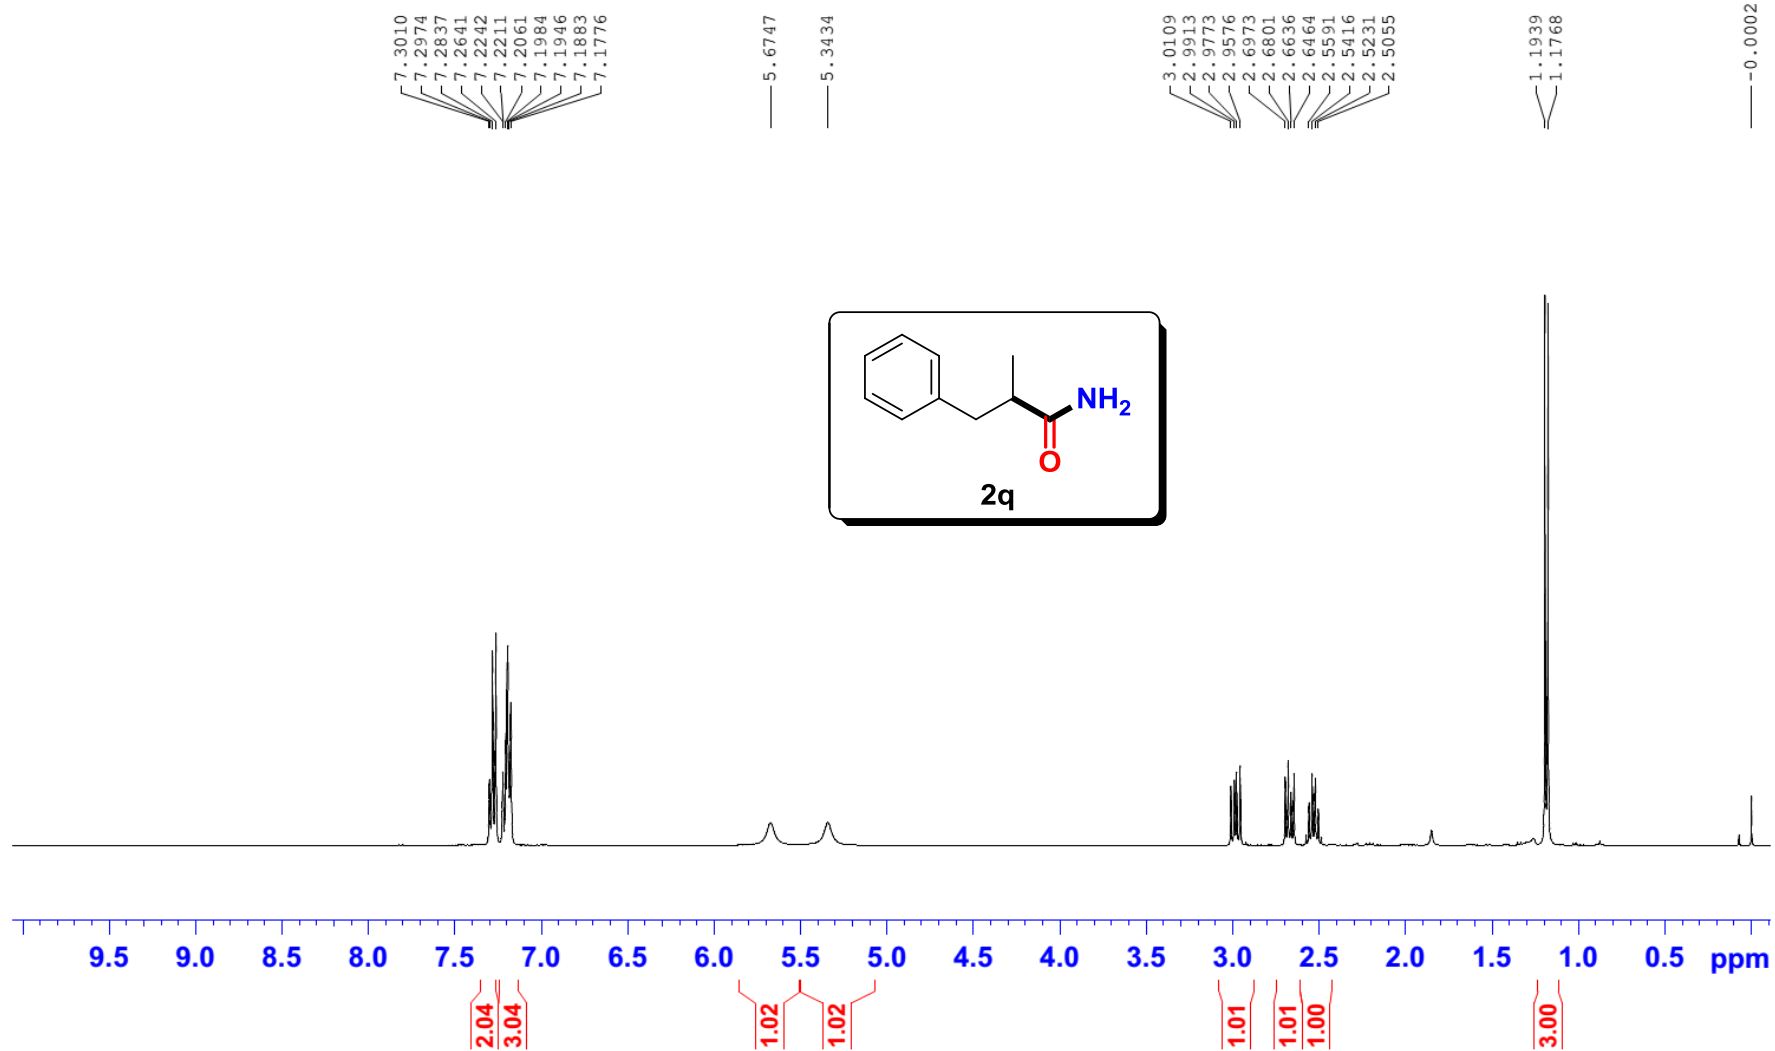

ZGY-X15X07-2-CNMR

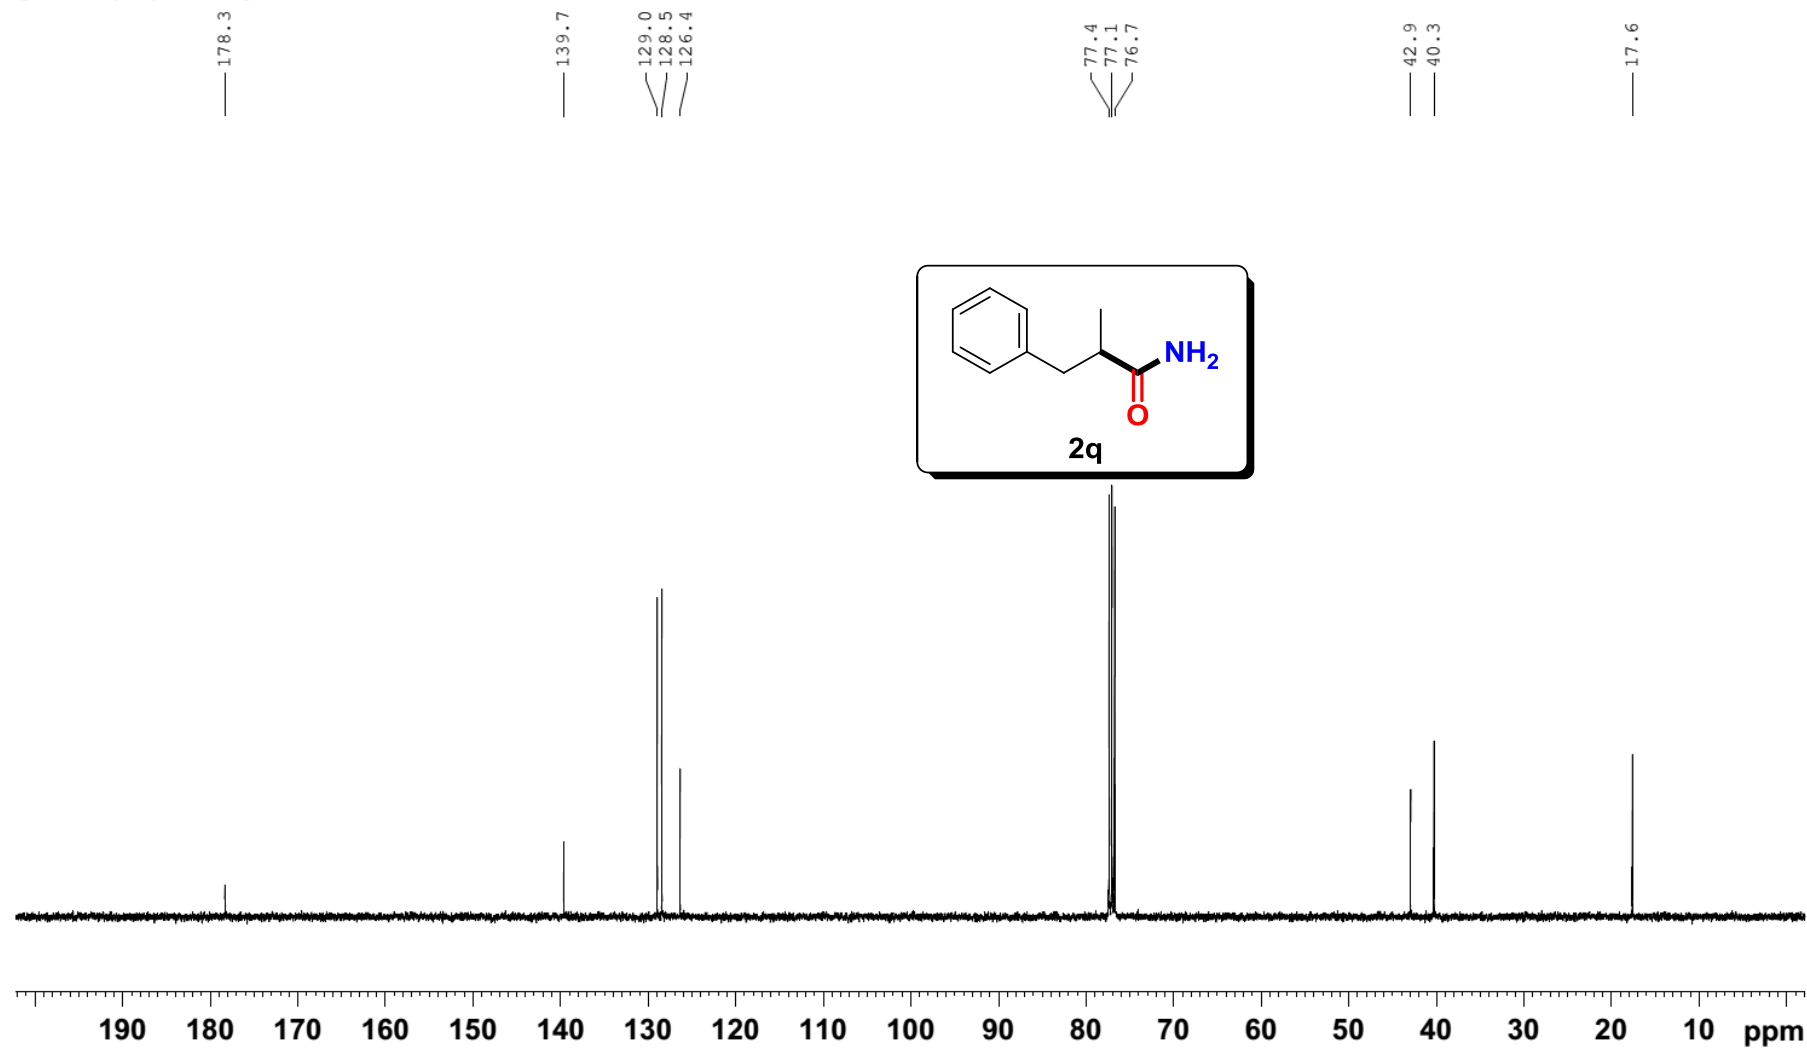

ZGY-150324-1-HNMR

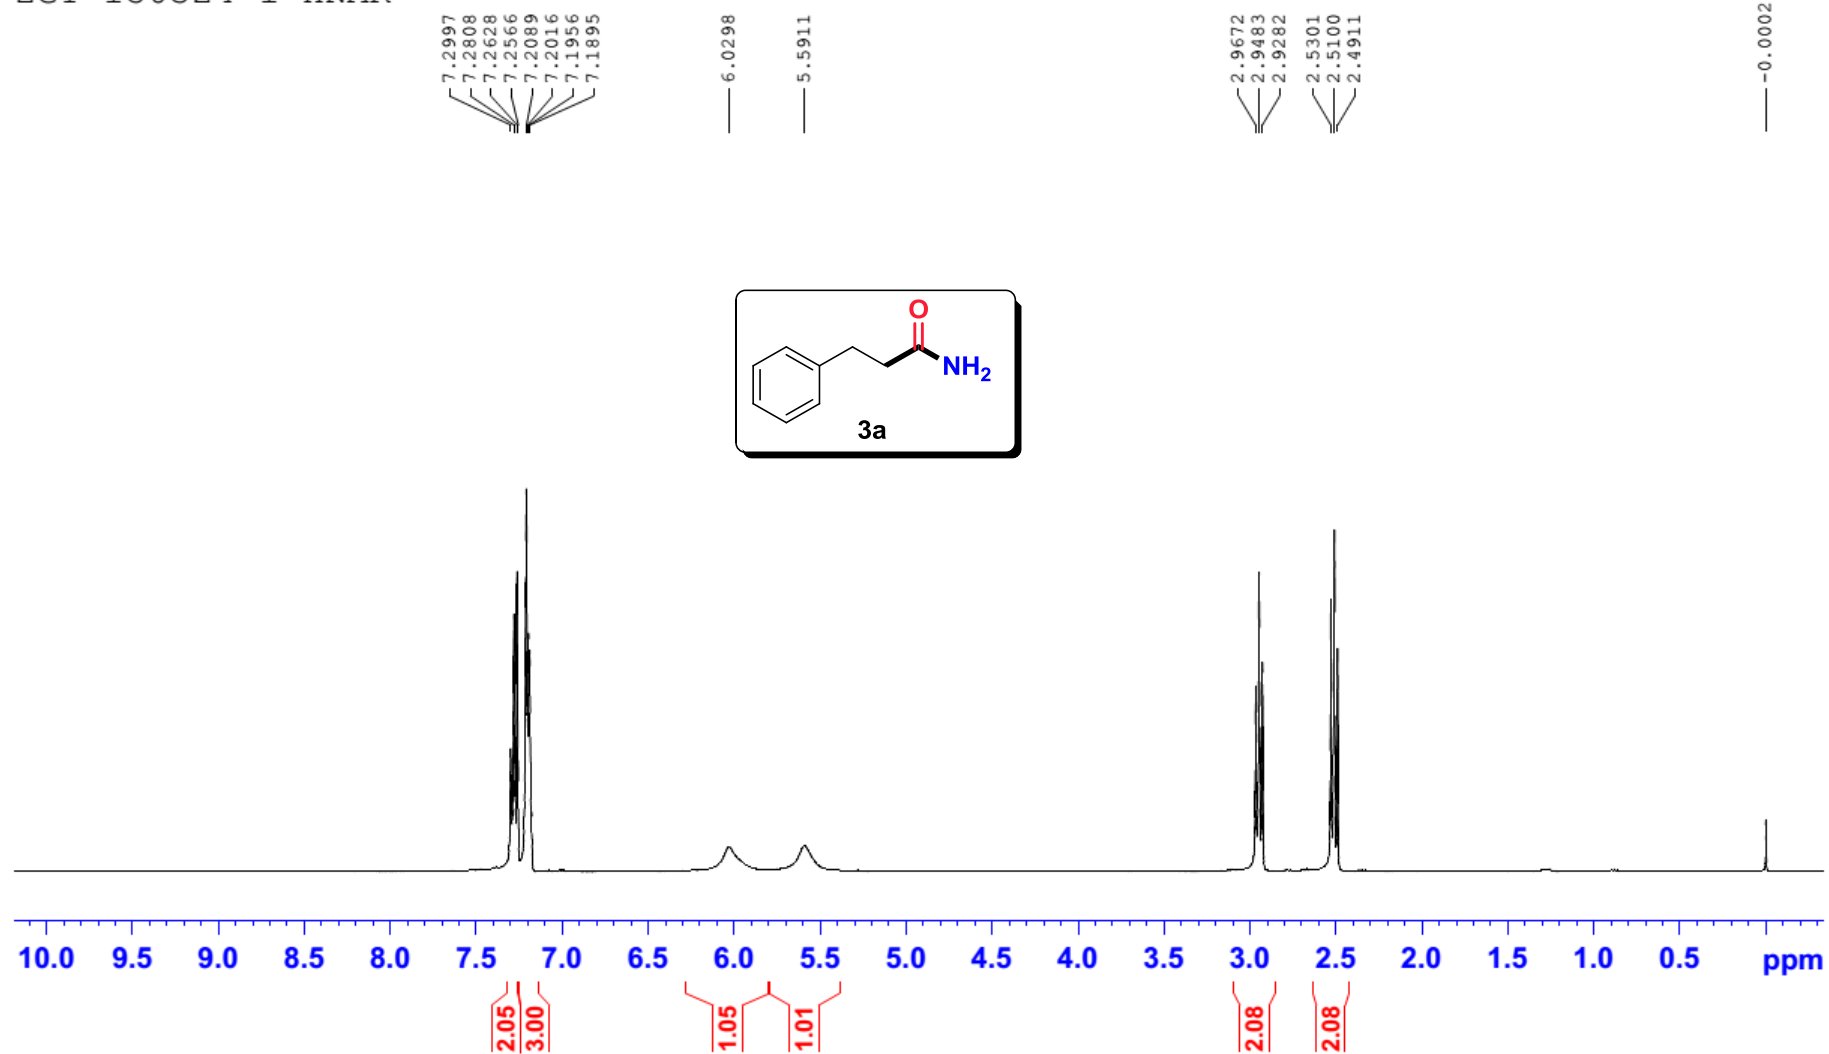

ZGY-150324-1-CNMR

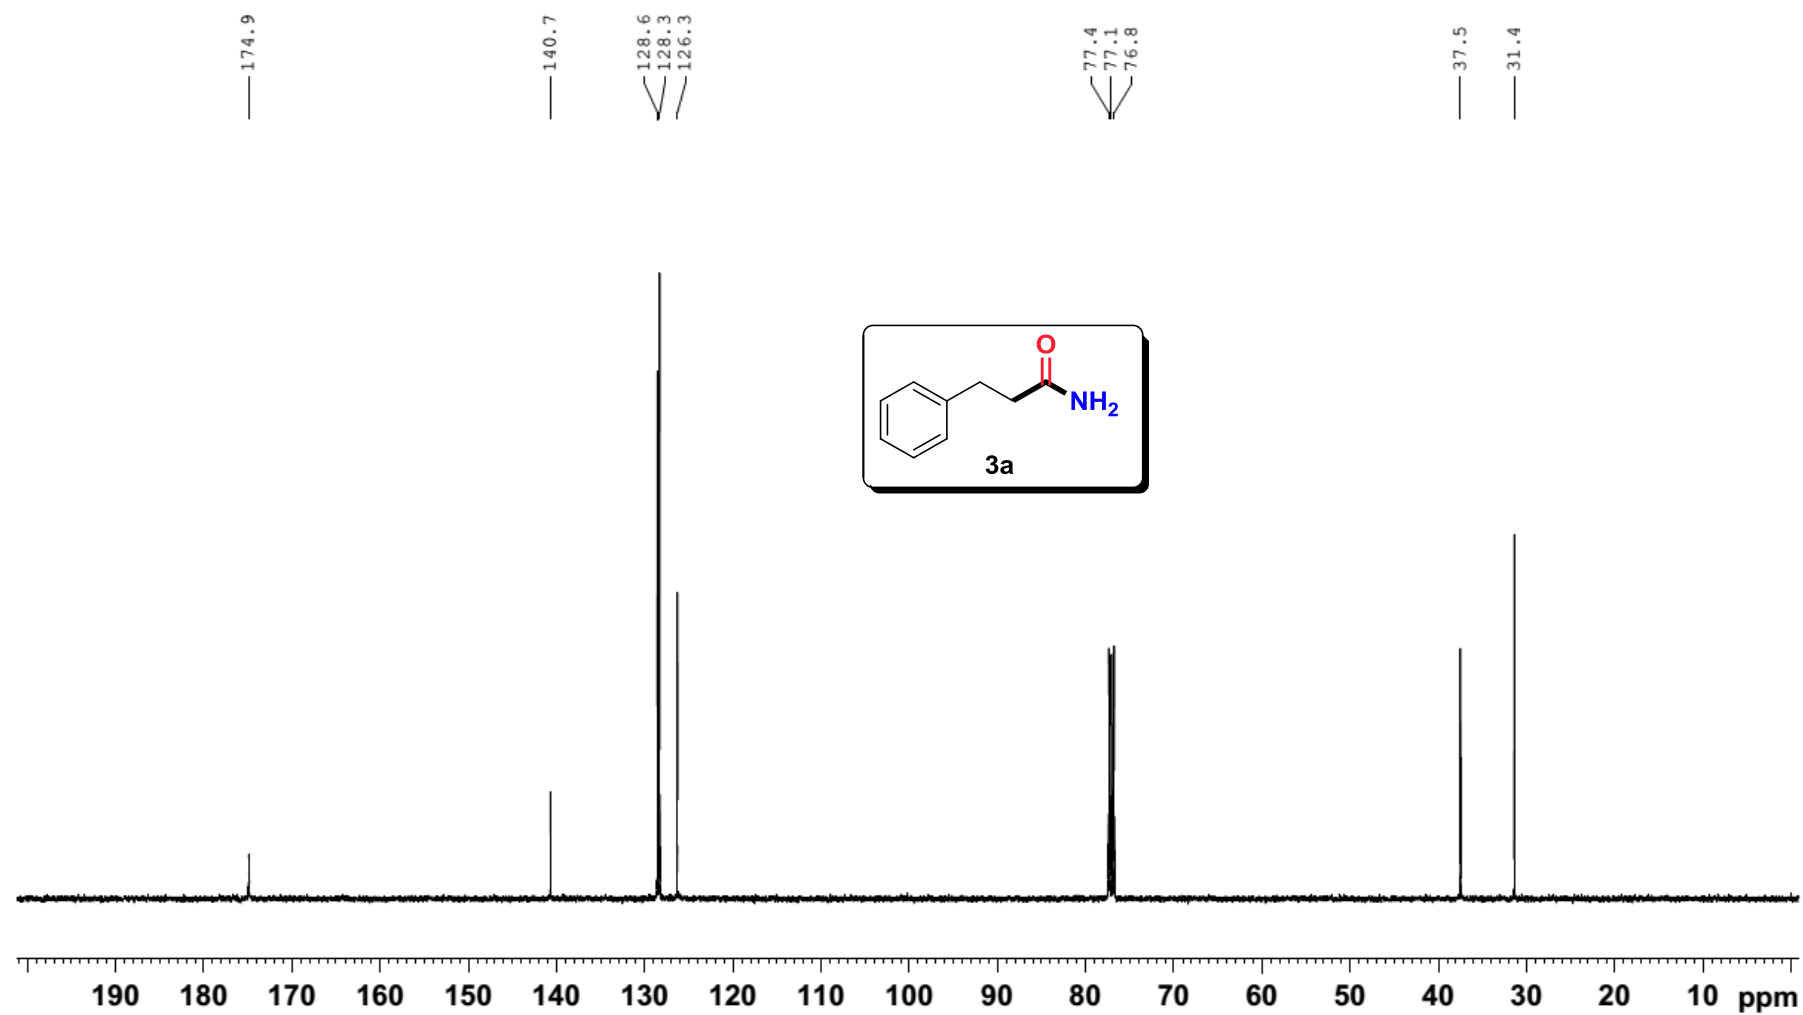

ZCY-X150928-5-HNMR

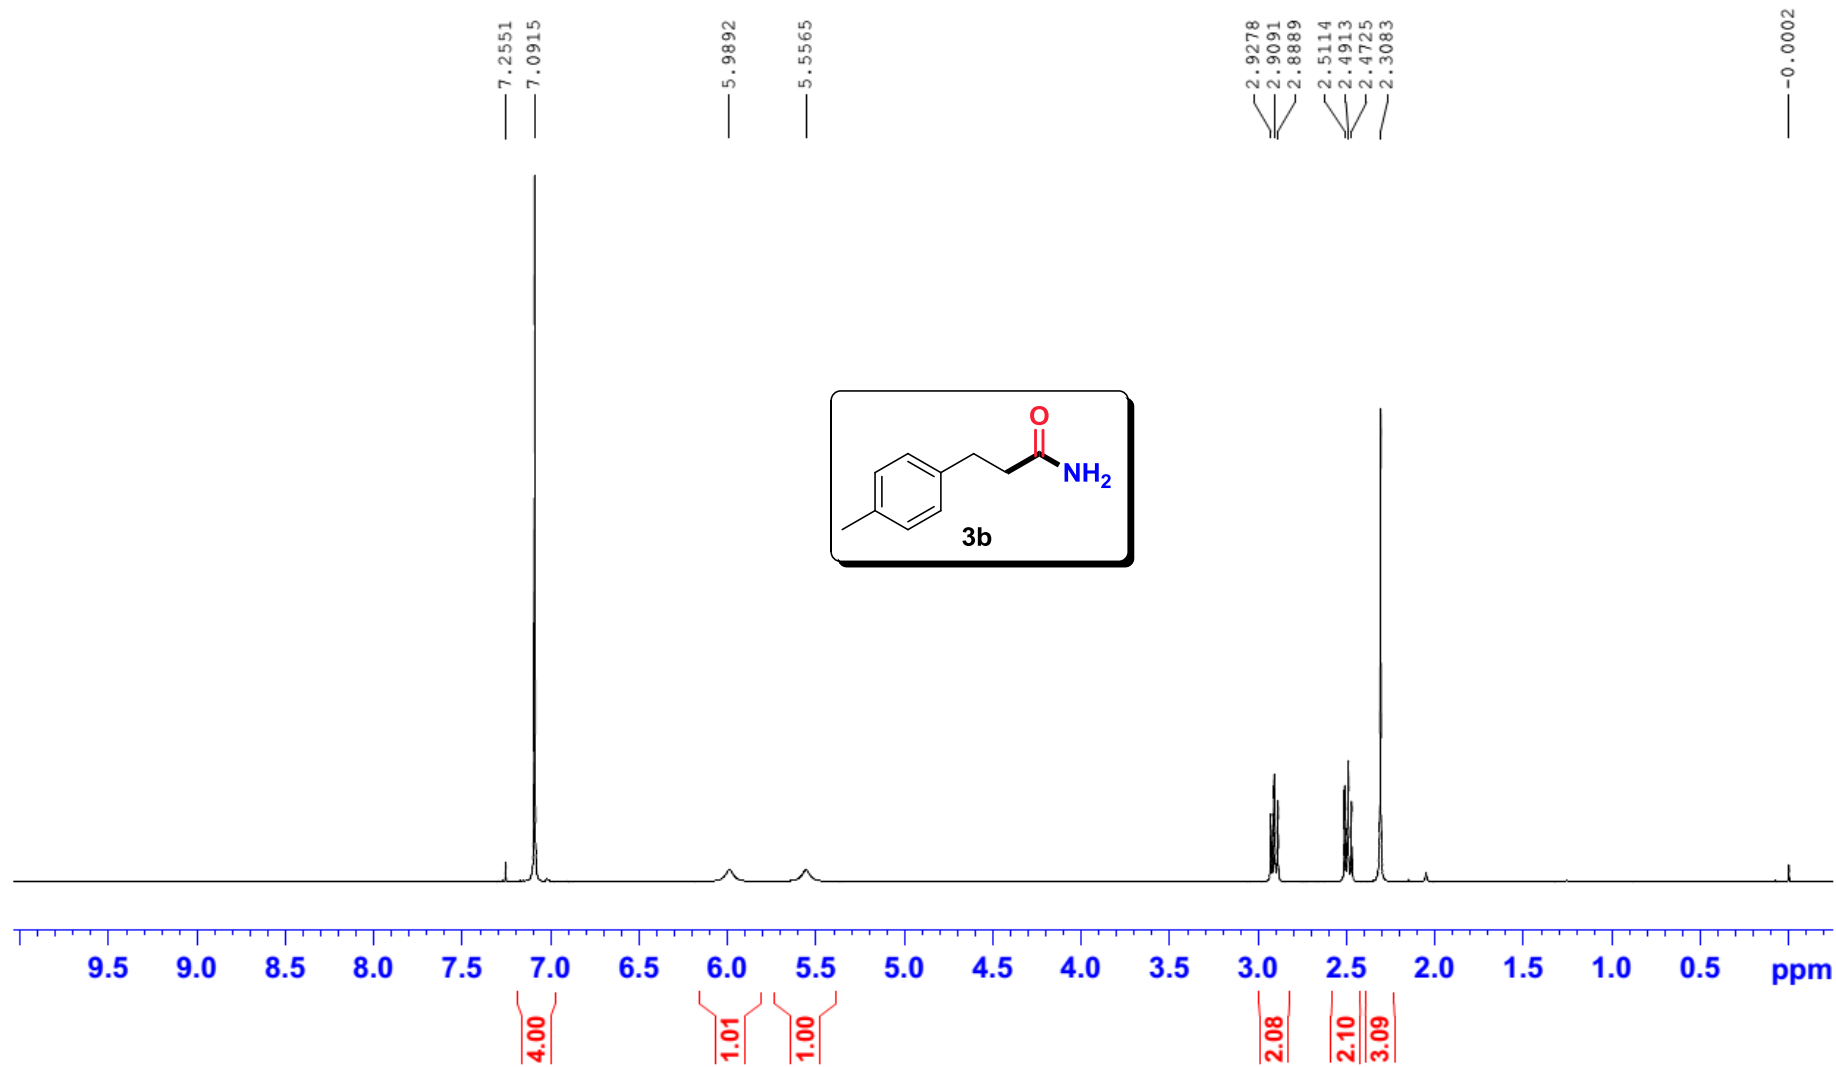

ZCY-X150928-5-CNMR

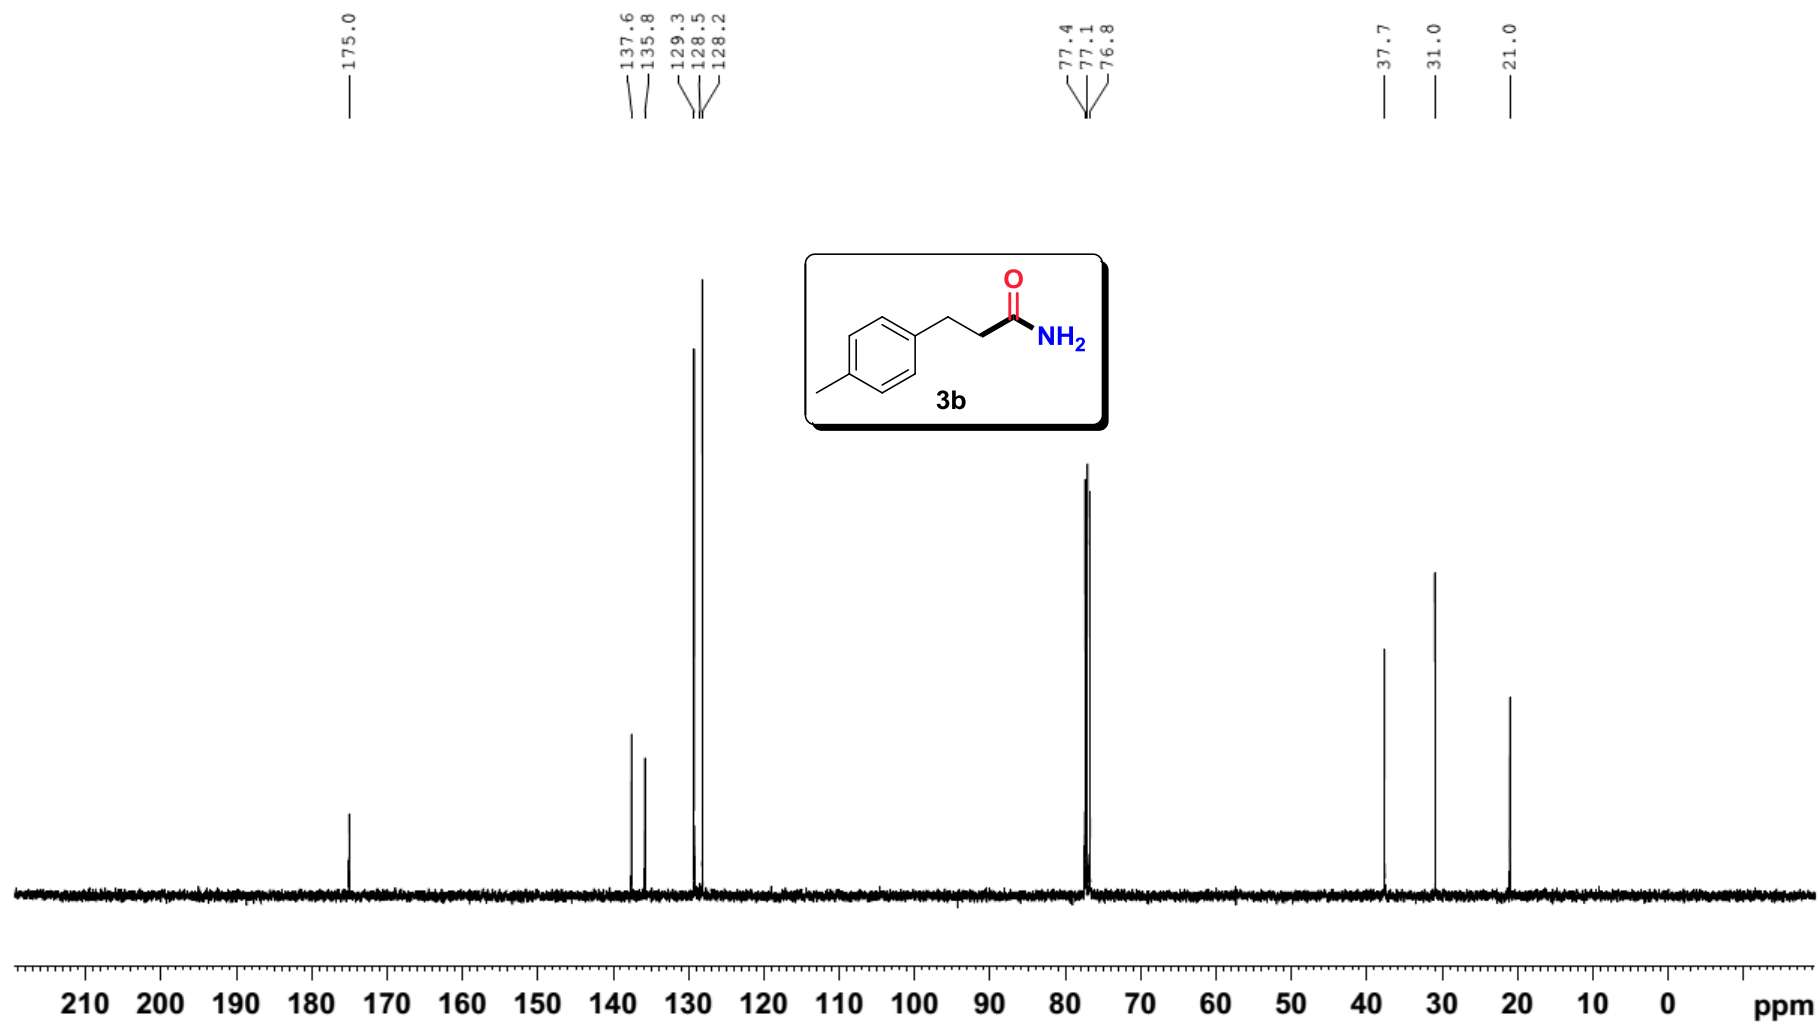

ZCY-X150928-3-HNMR

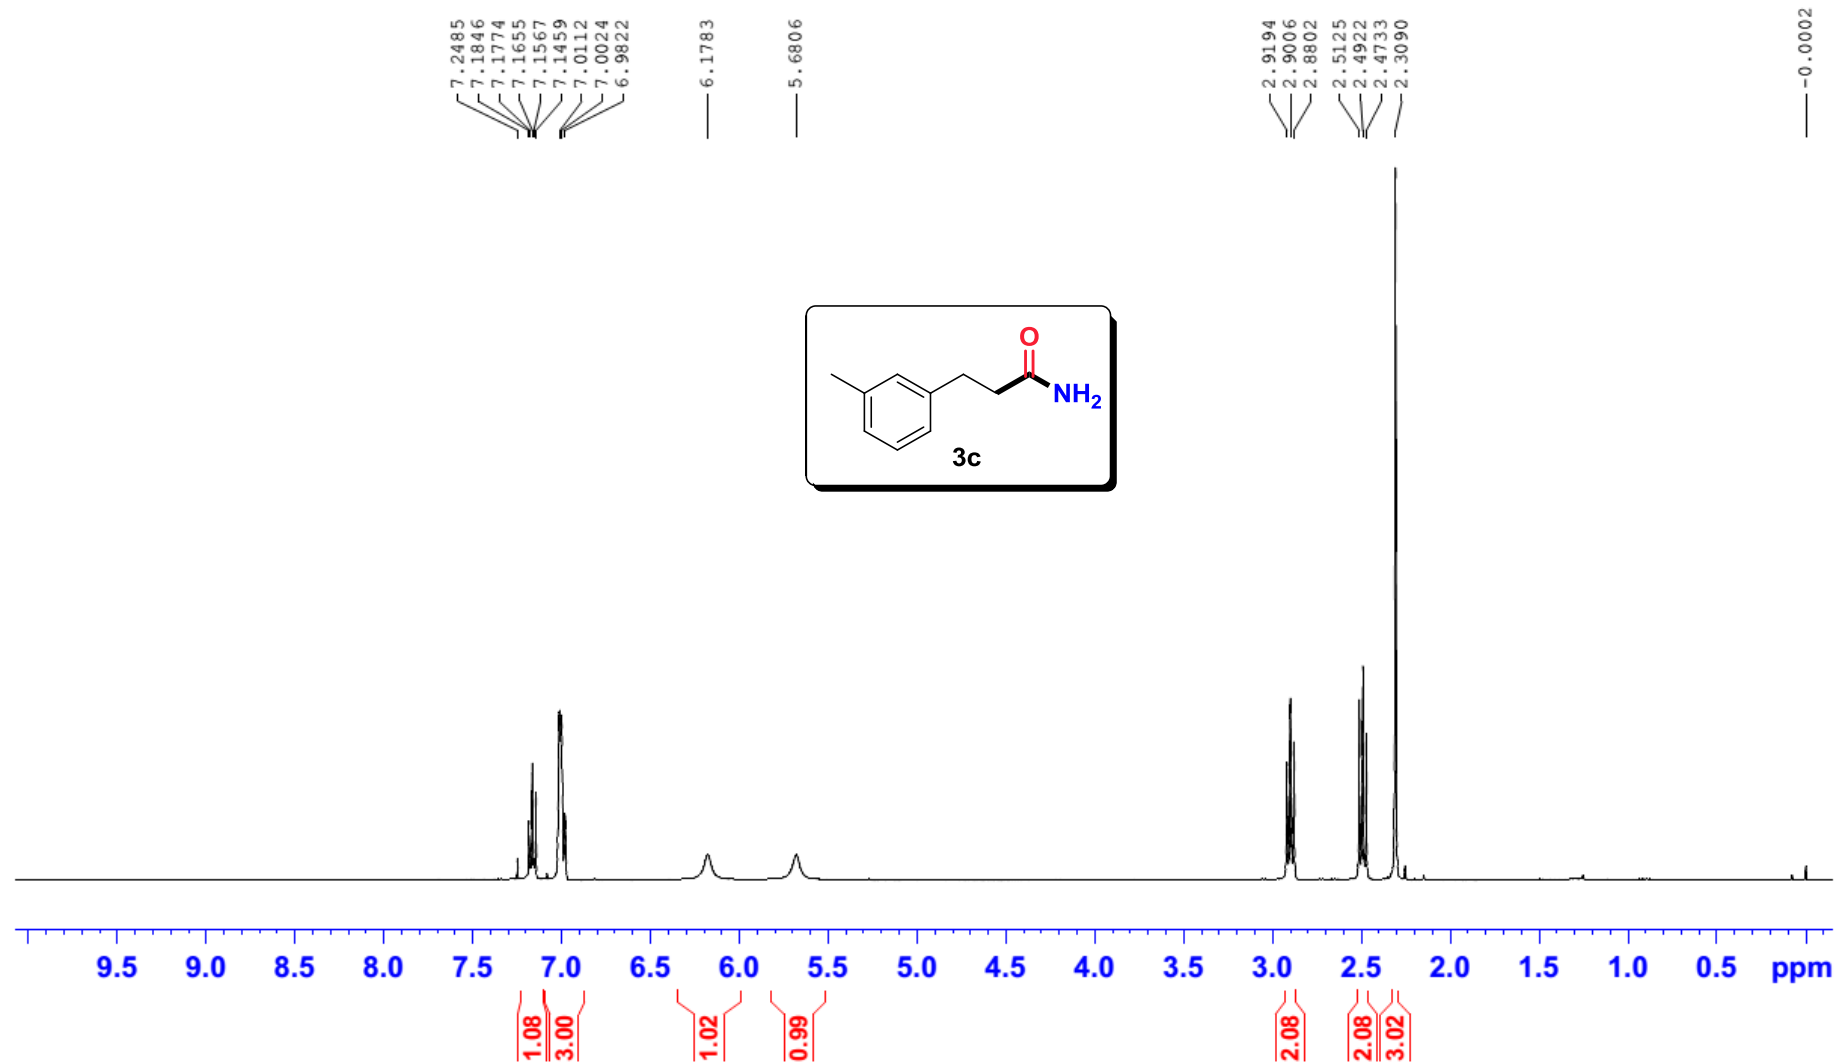



ZCY-X150928-3-CNMR

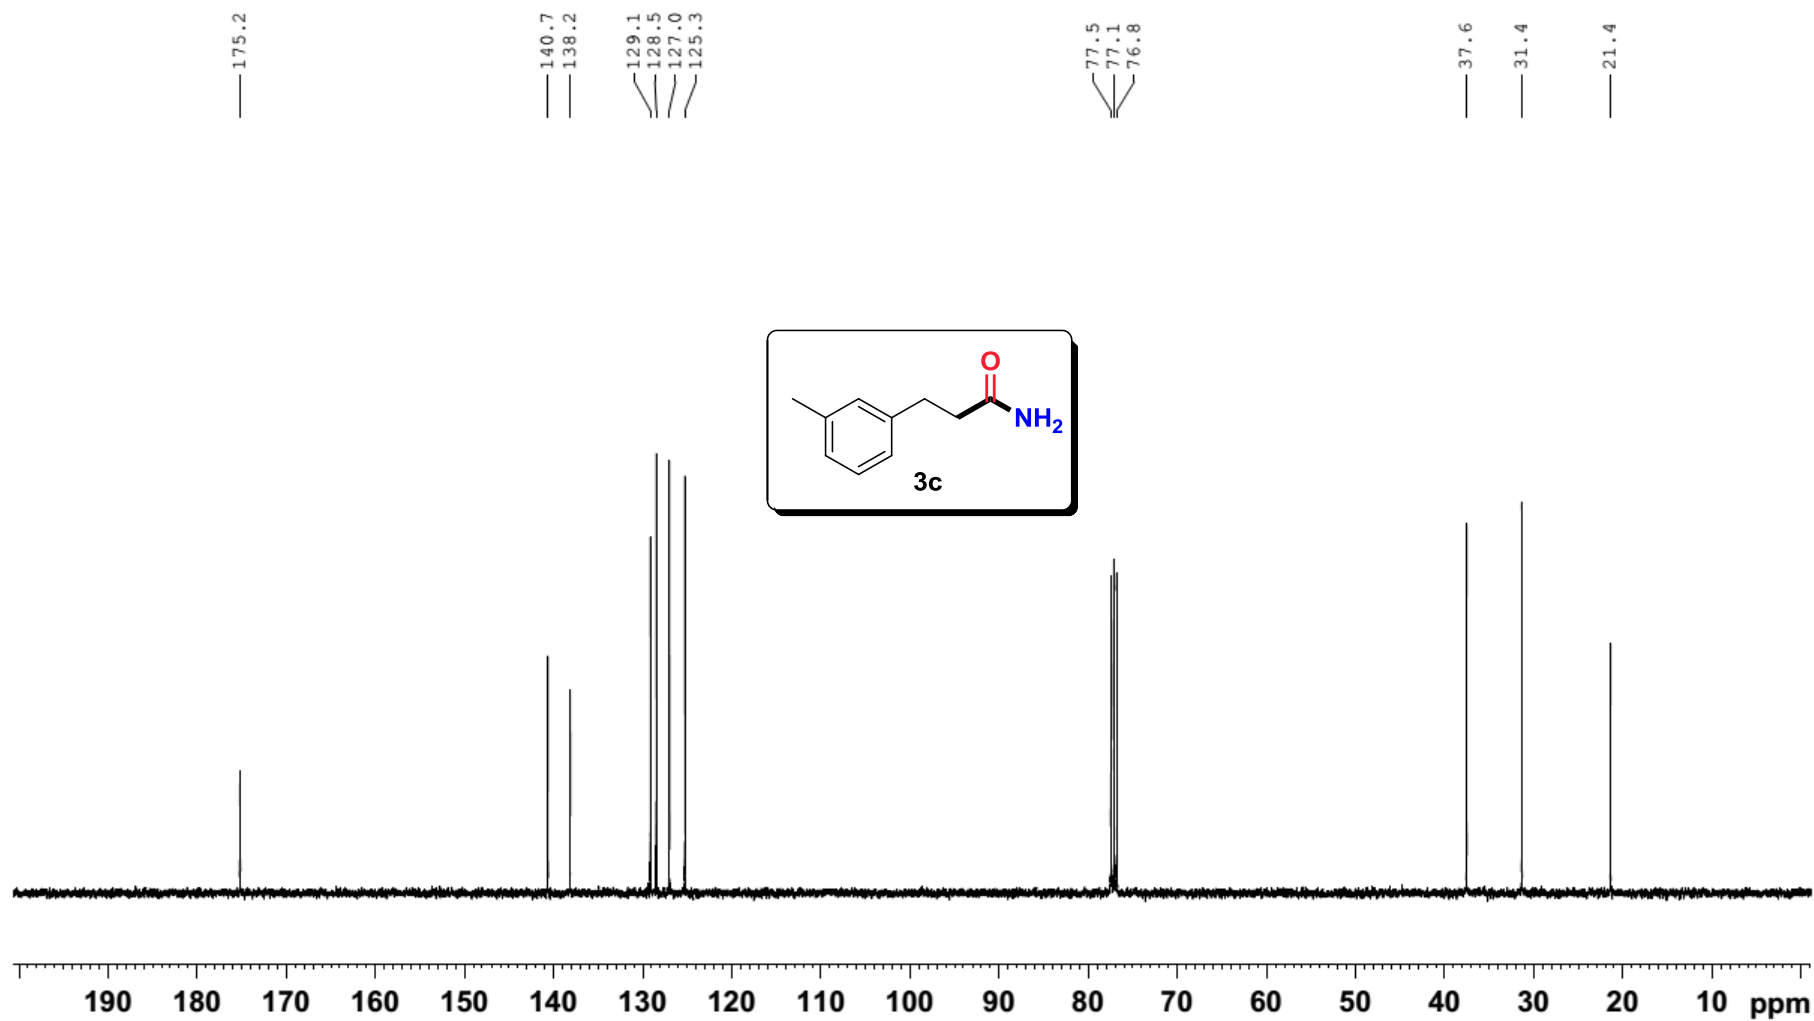

ZCY-X150928-2-HNMR

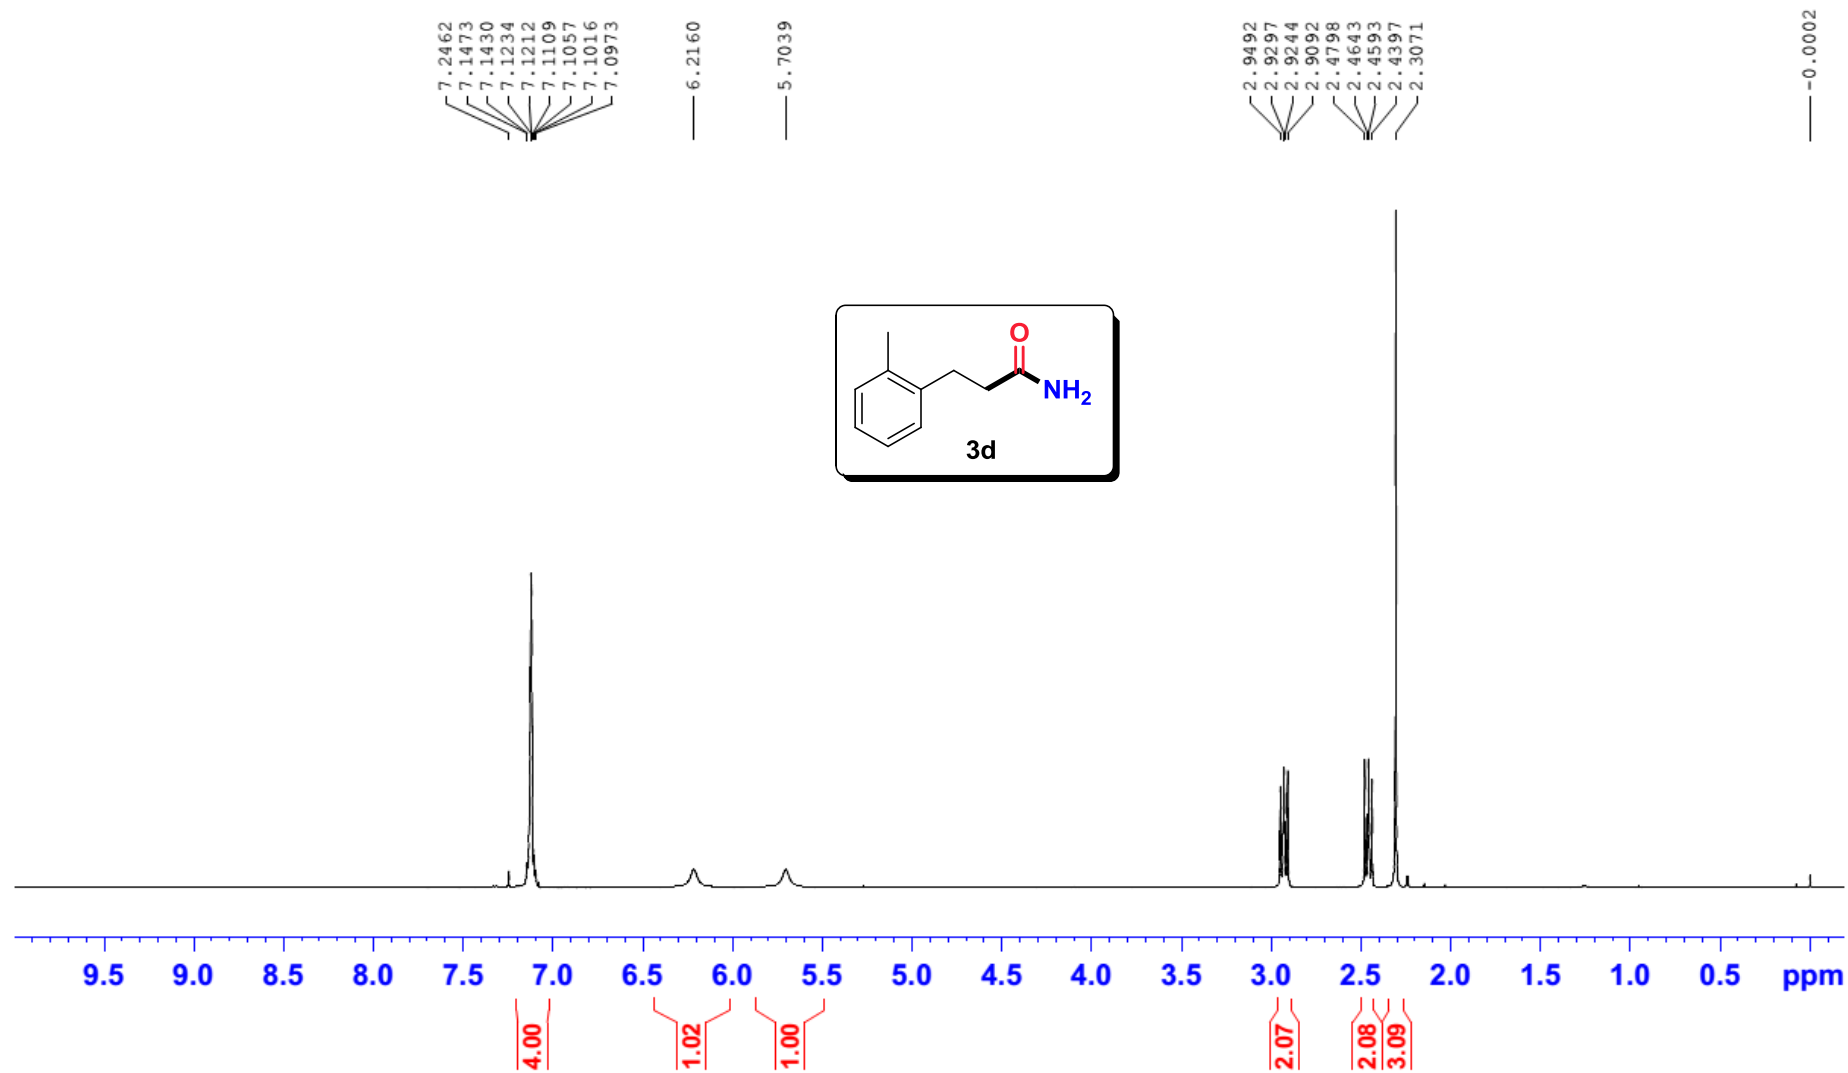

ZCY-X150928-2-CNMR

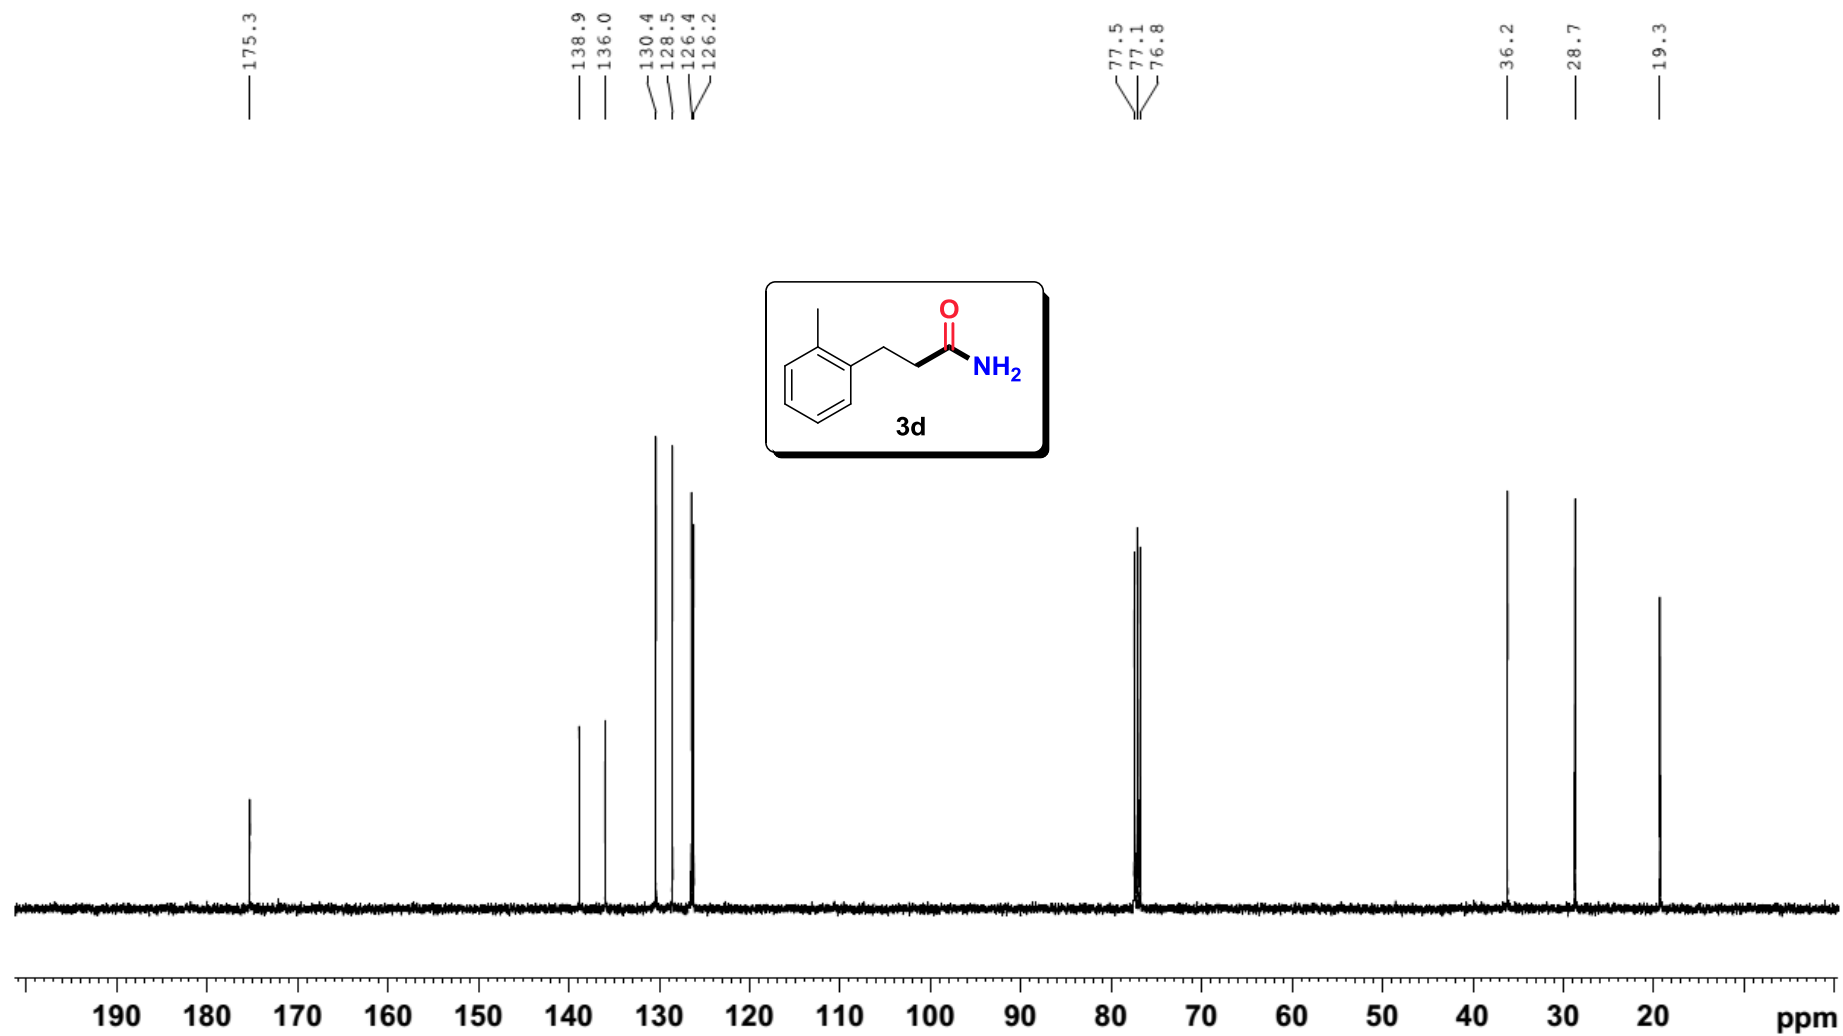

ZGY-X150930-5-HNMR

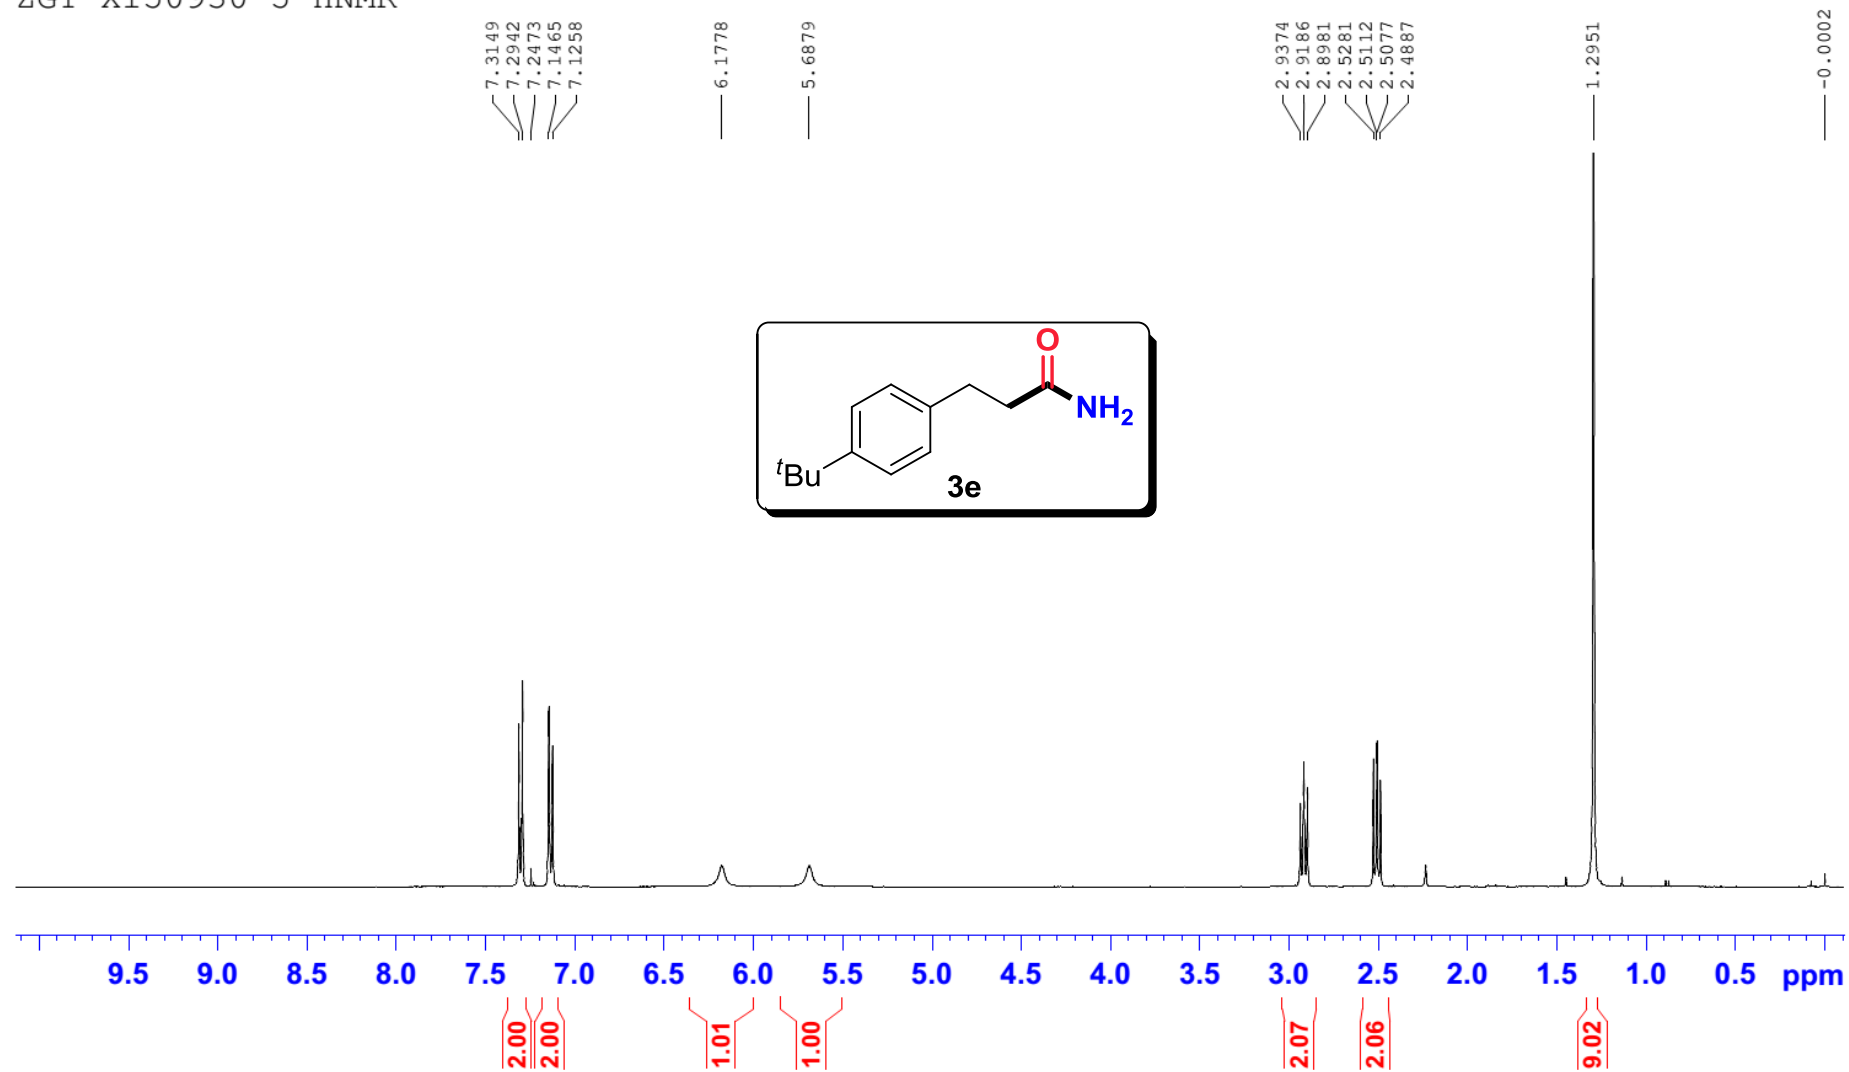

ZGY-X150930-5-CNMR

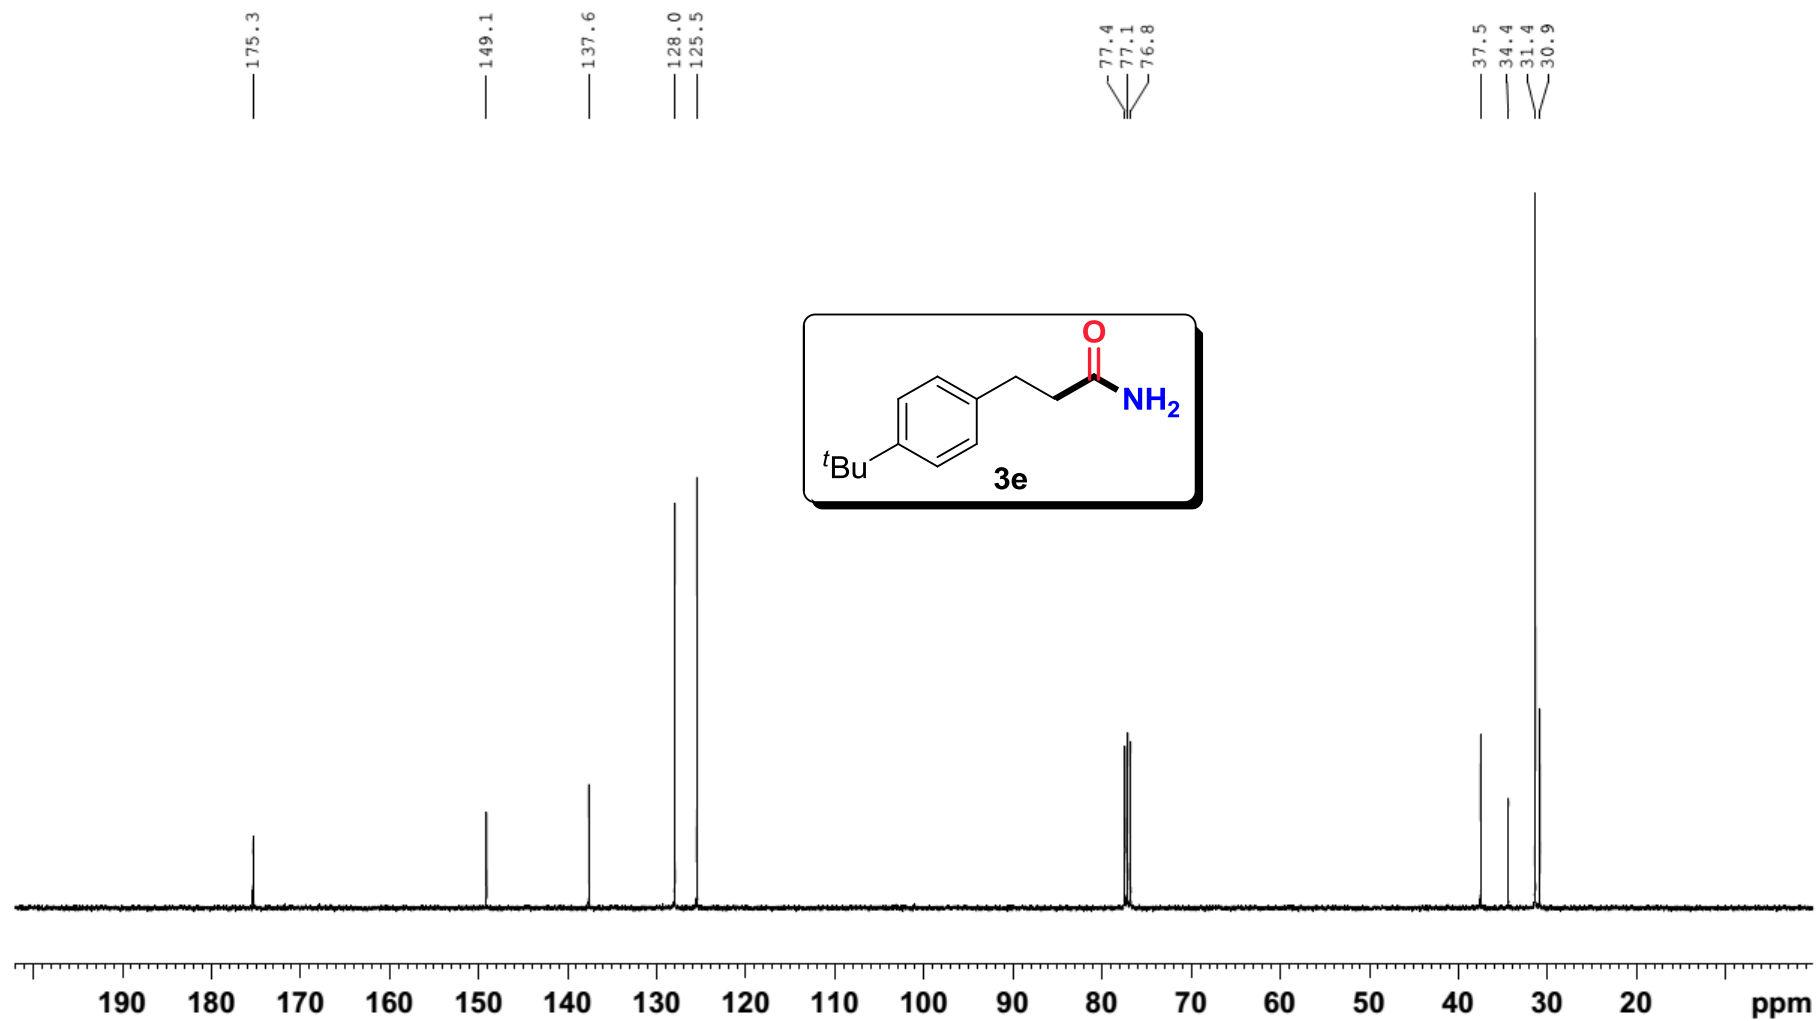

ZGY-X15X19-4-HNMR

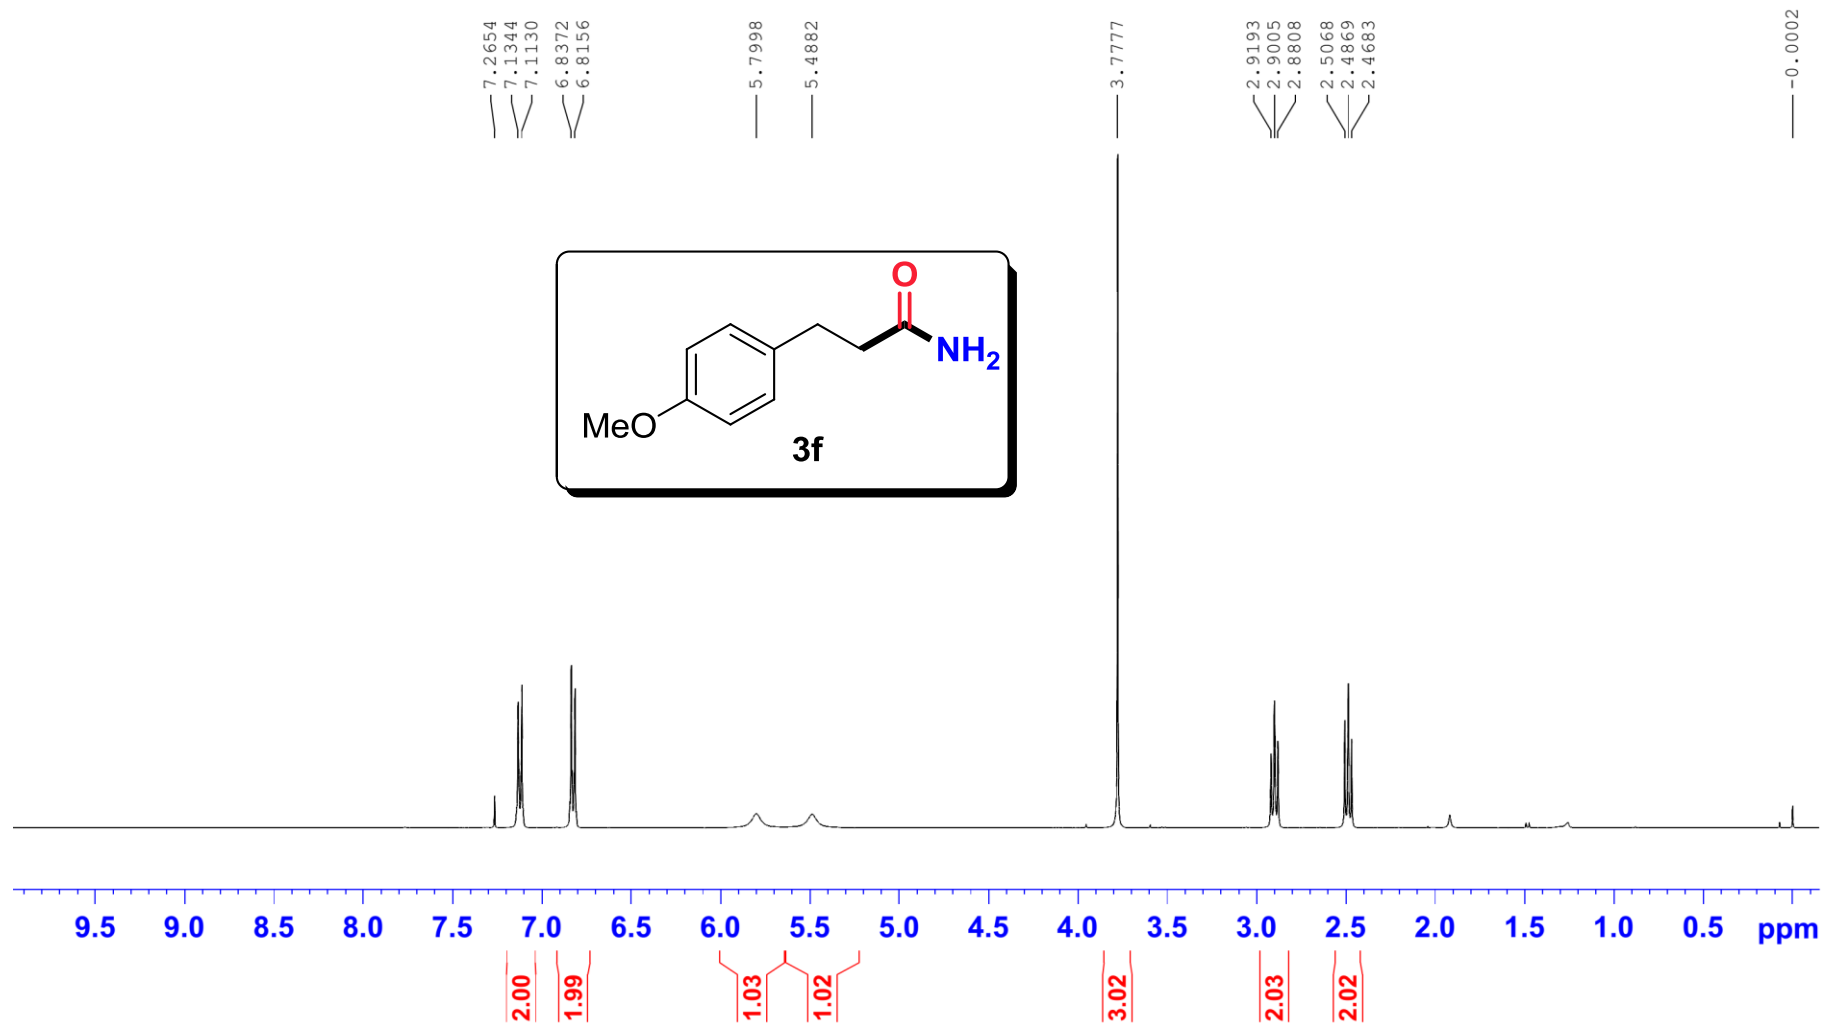

ZGY-X15X19-4-CNMR

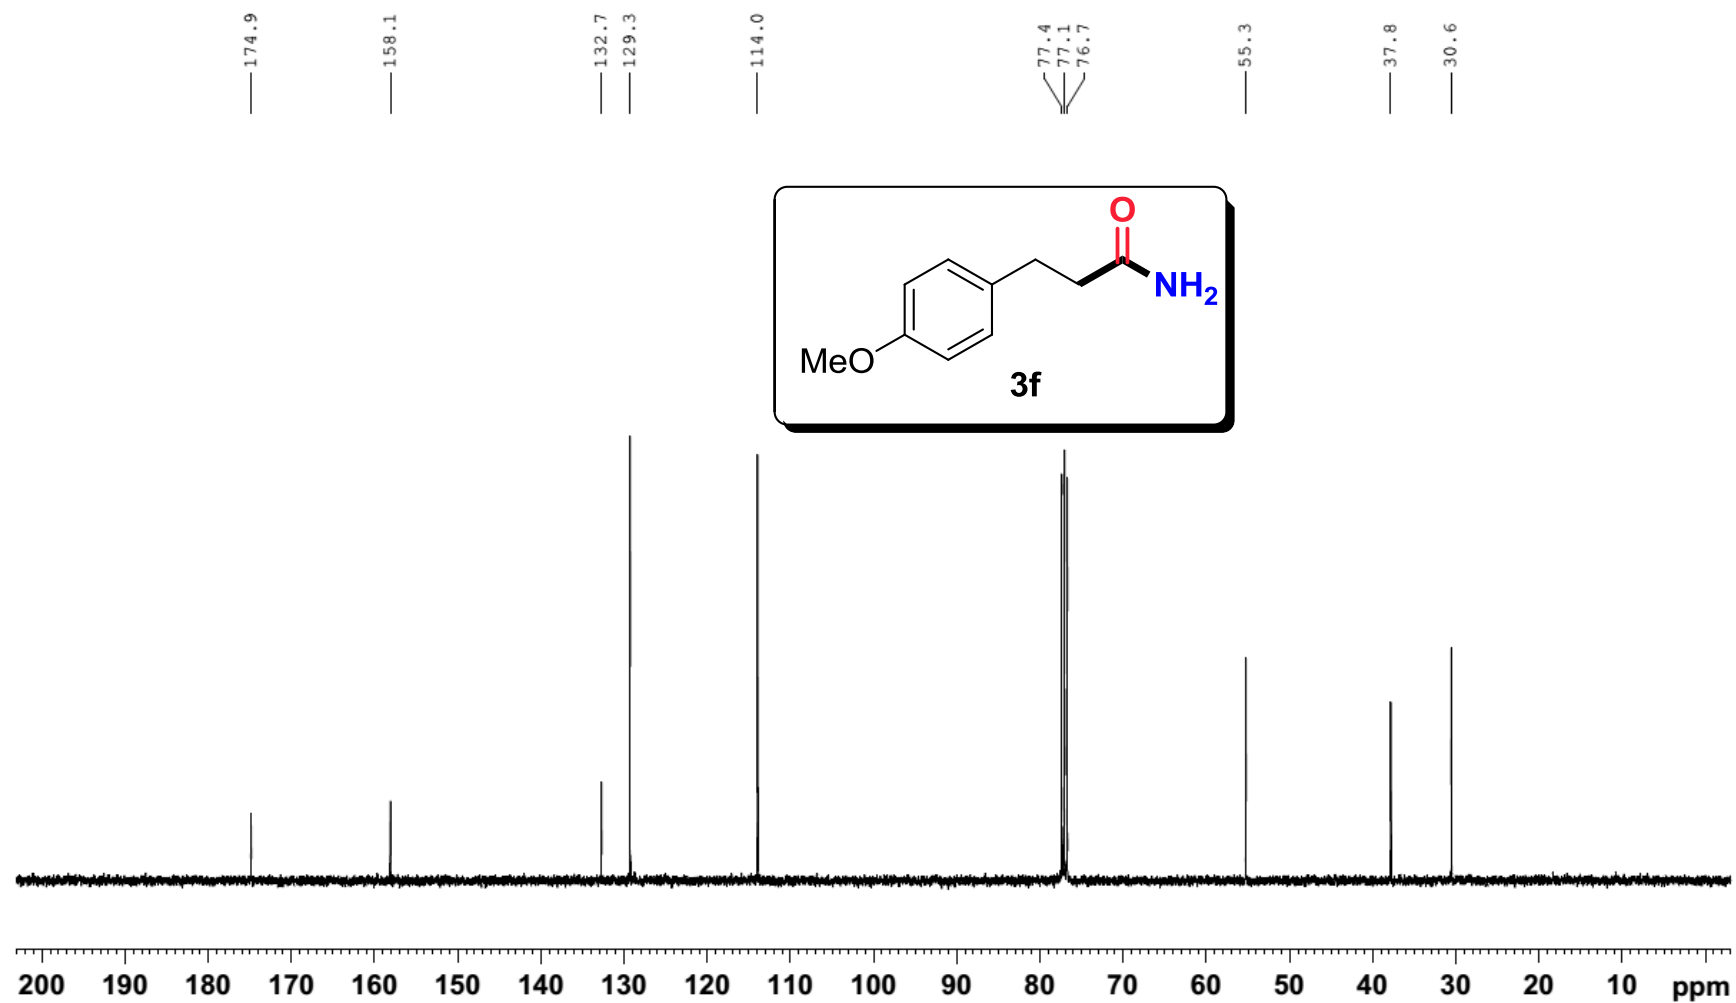

ZGY-X15Y10-1-HNMR

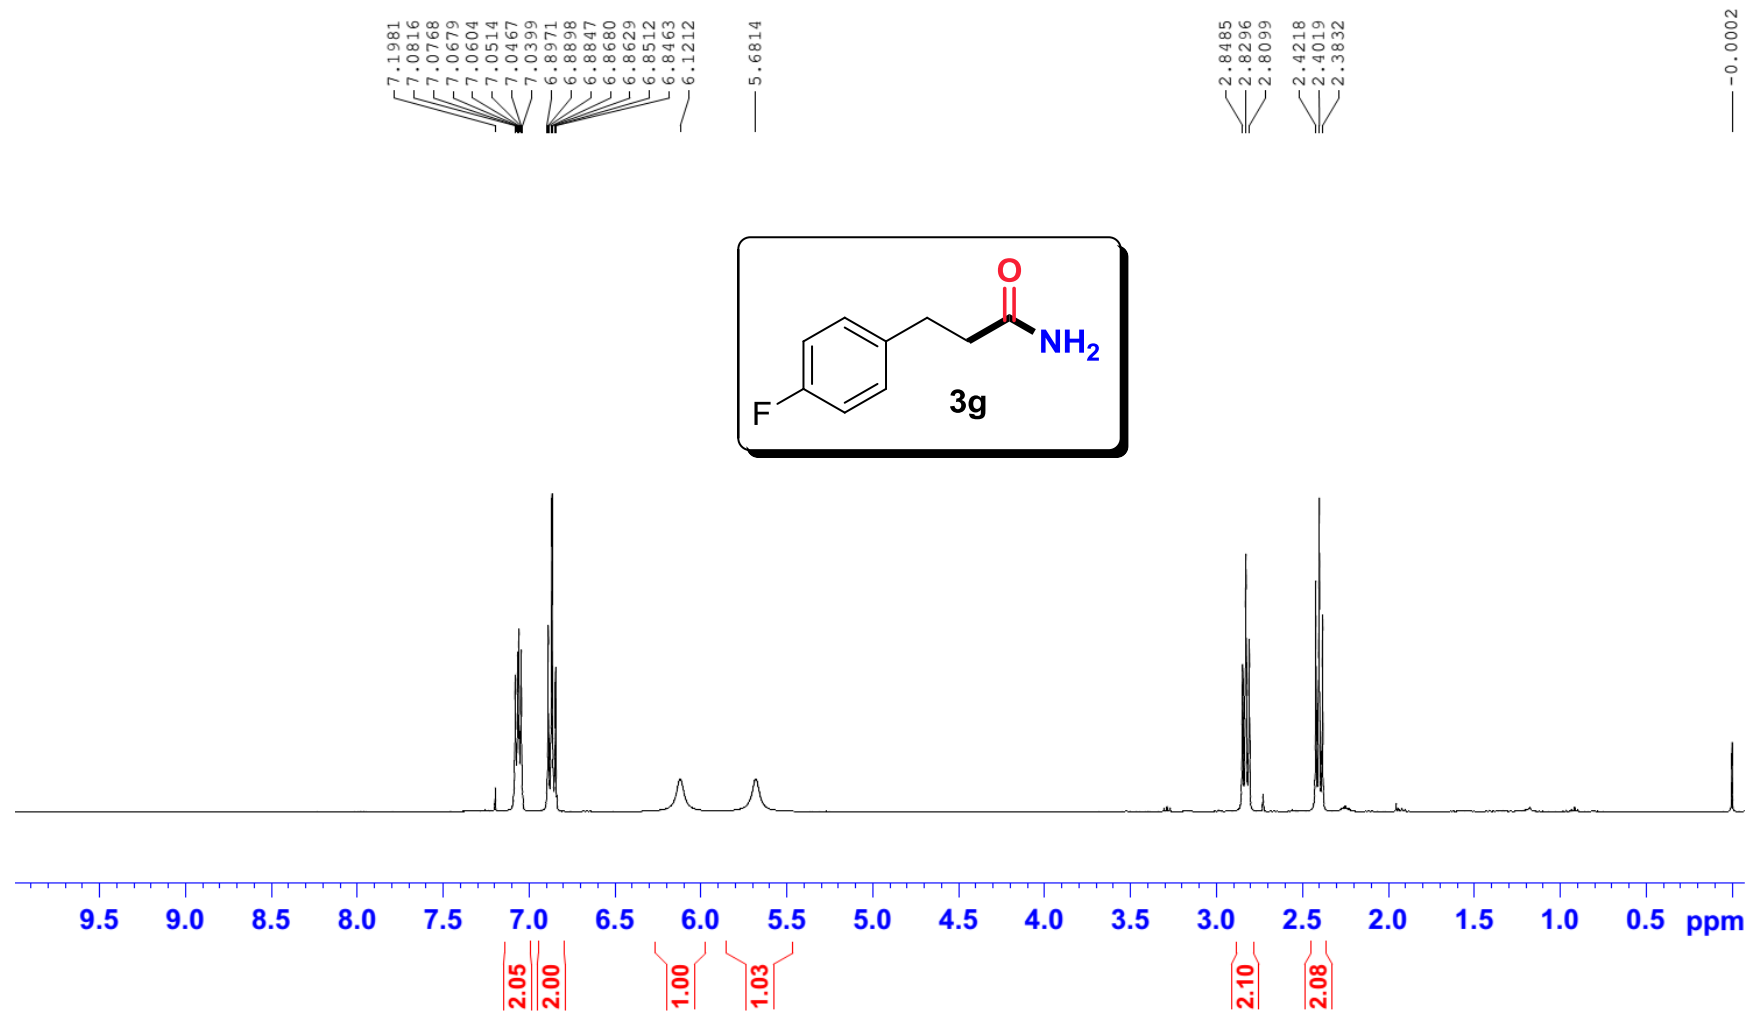



ZGY-X15Y10-1-CNMR

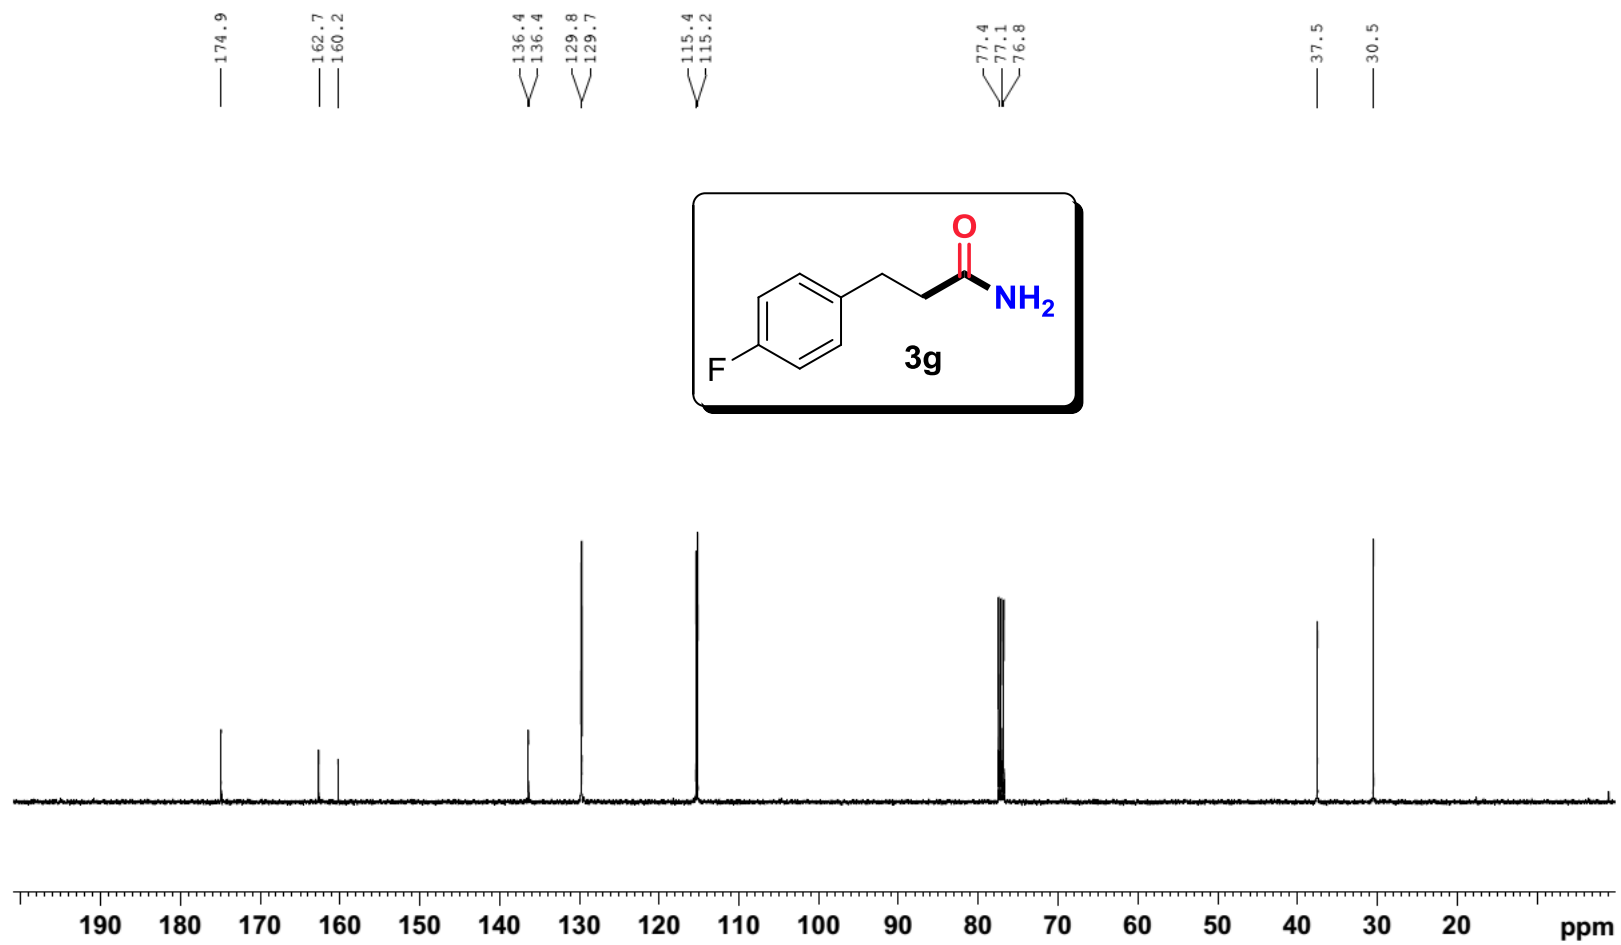

ZGY-X15Y10-1-FNMR

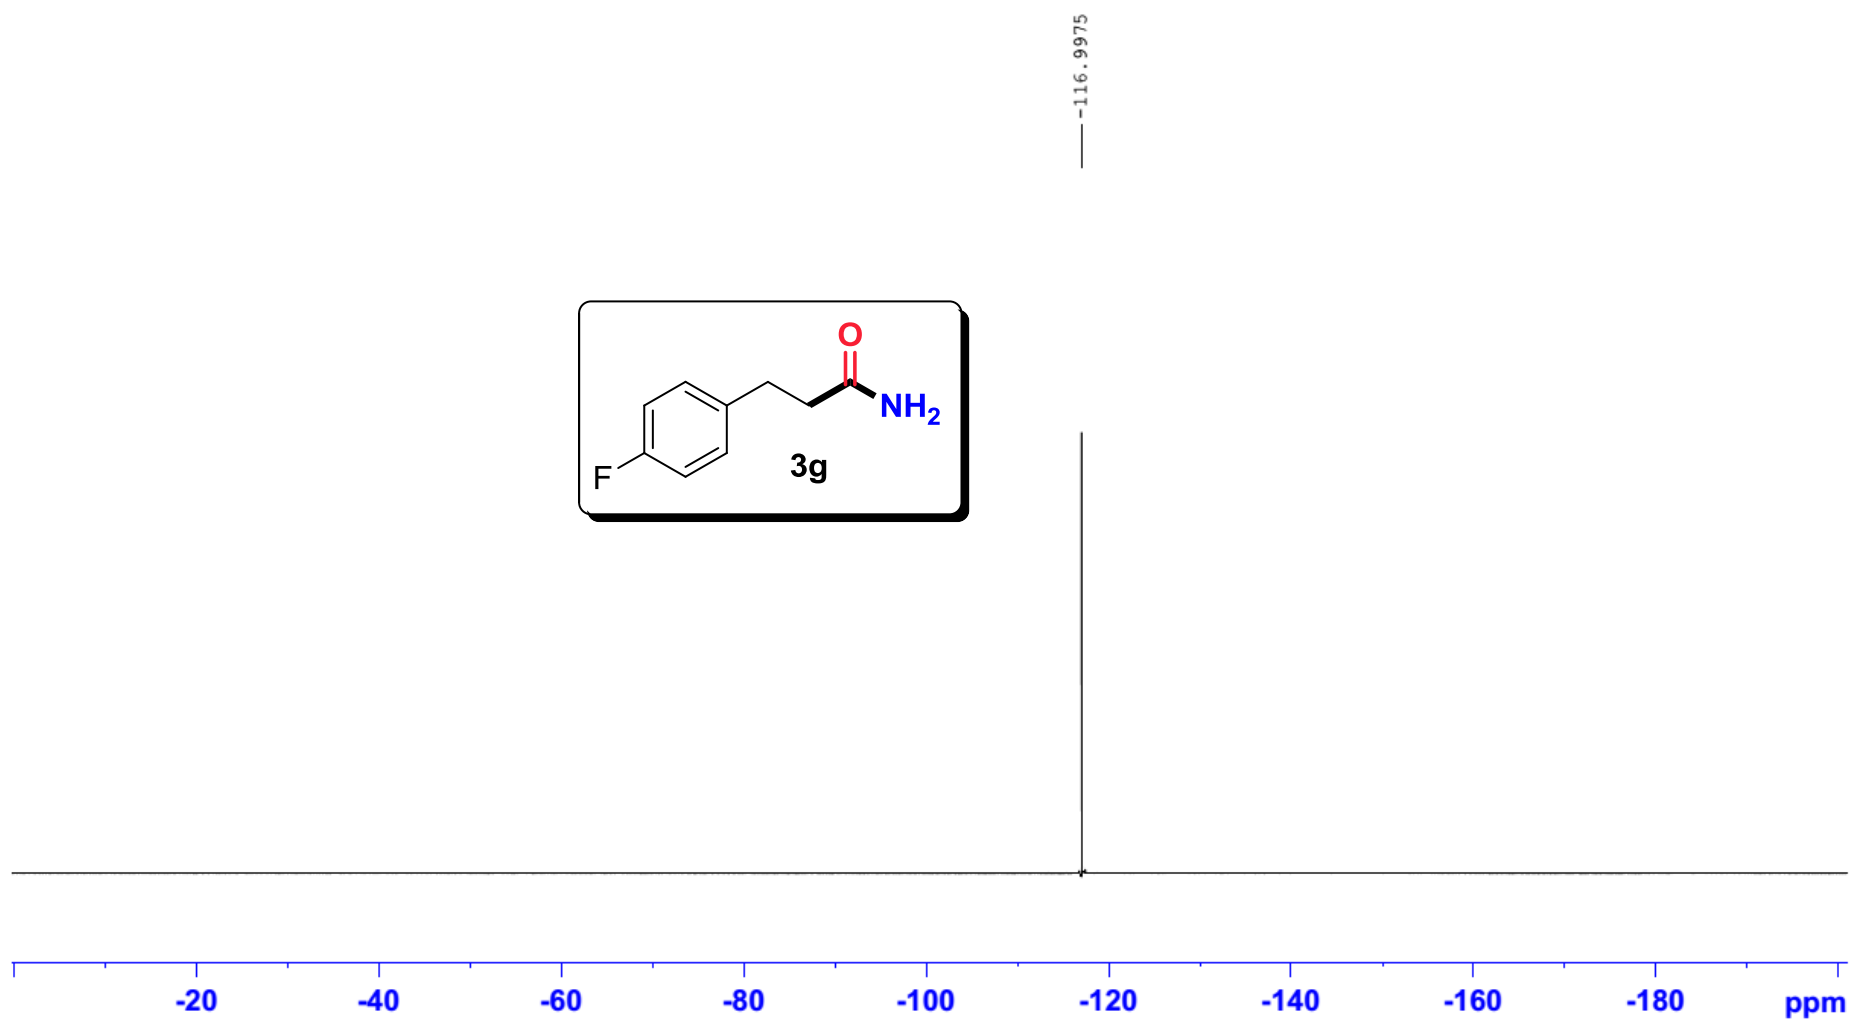

ZGY-X150930-6-HNMR

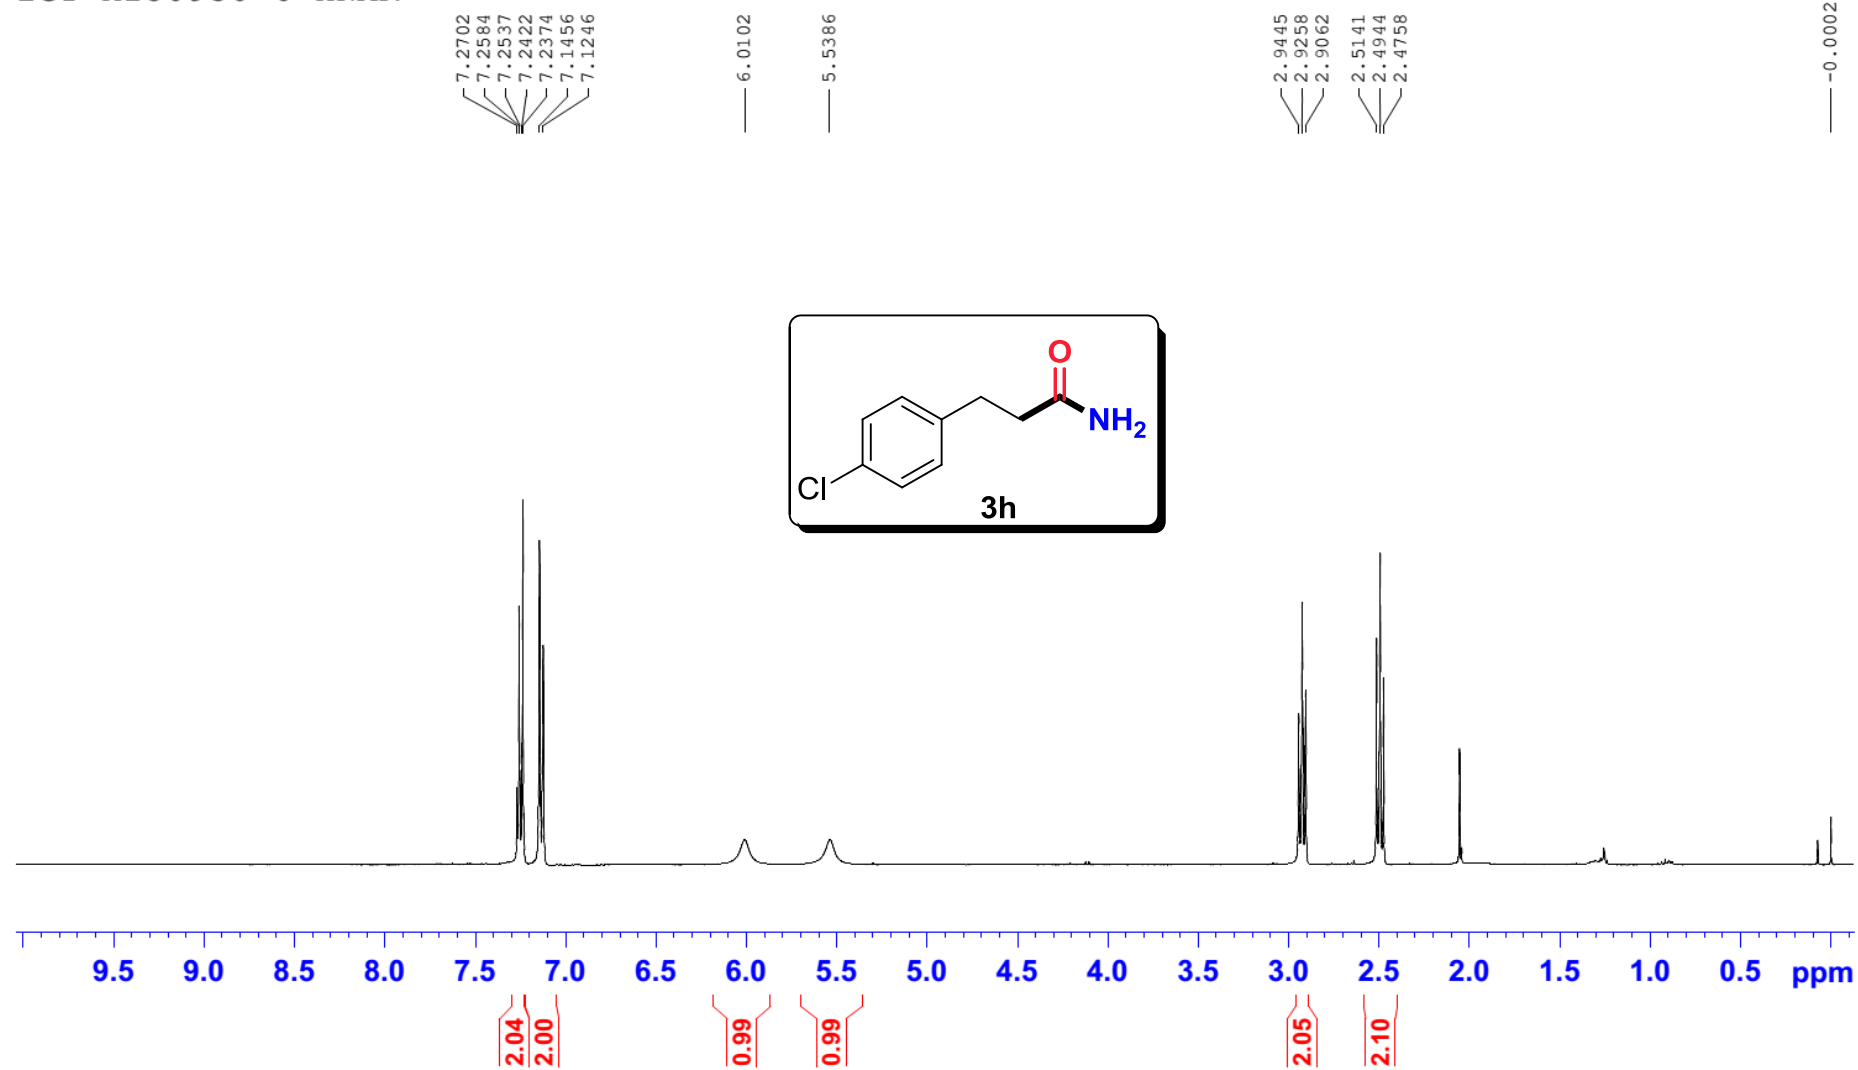

ZGY-X150930-6-CNMR

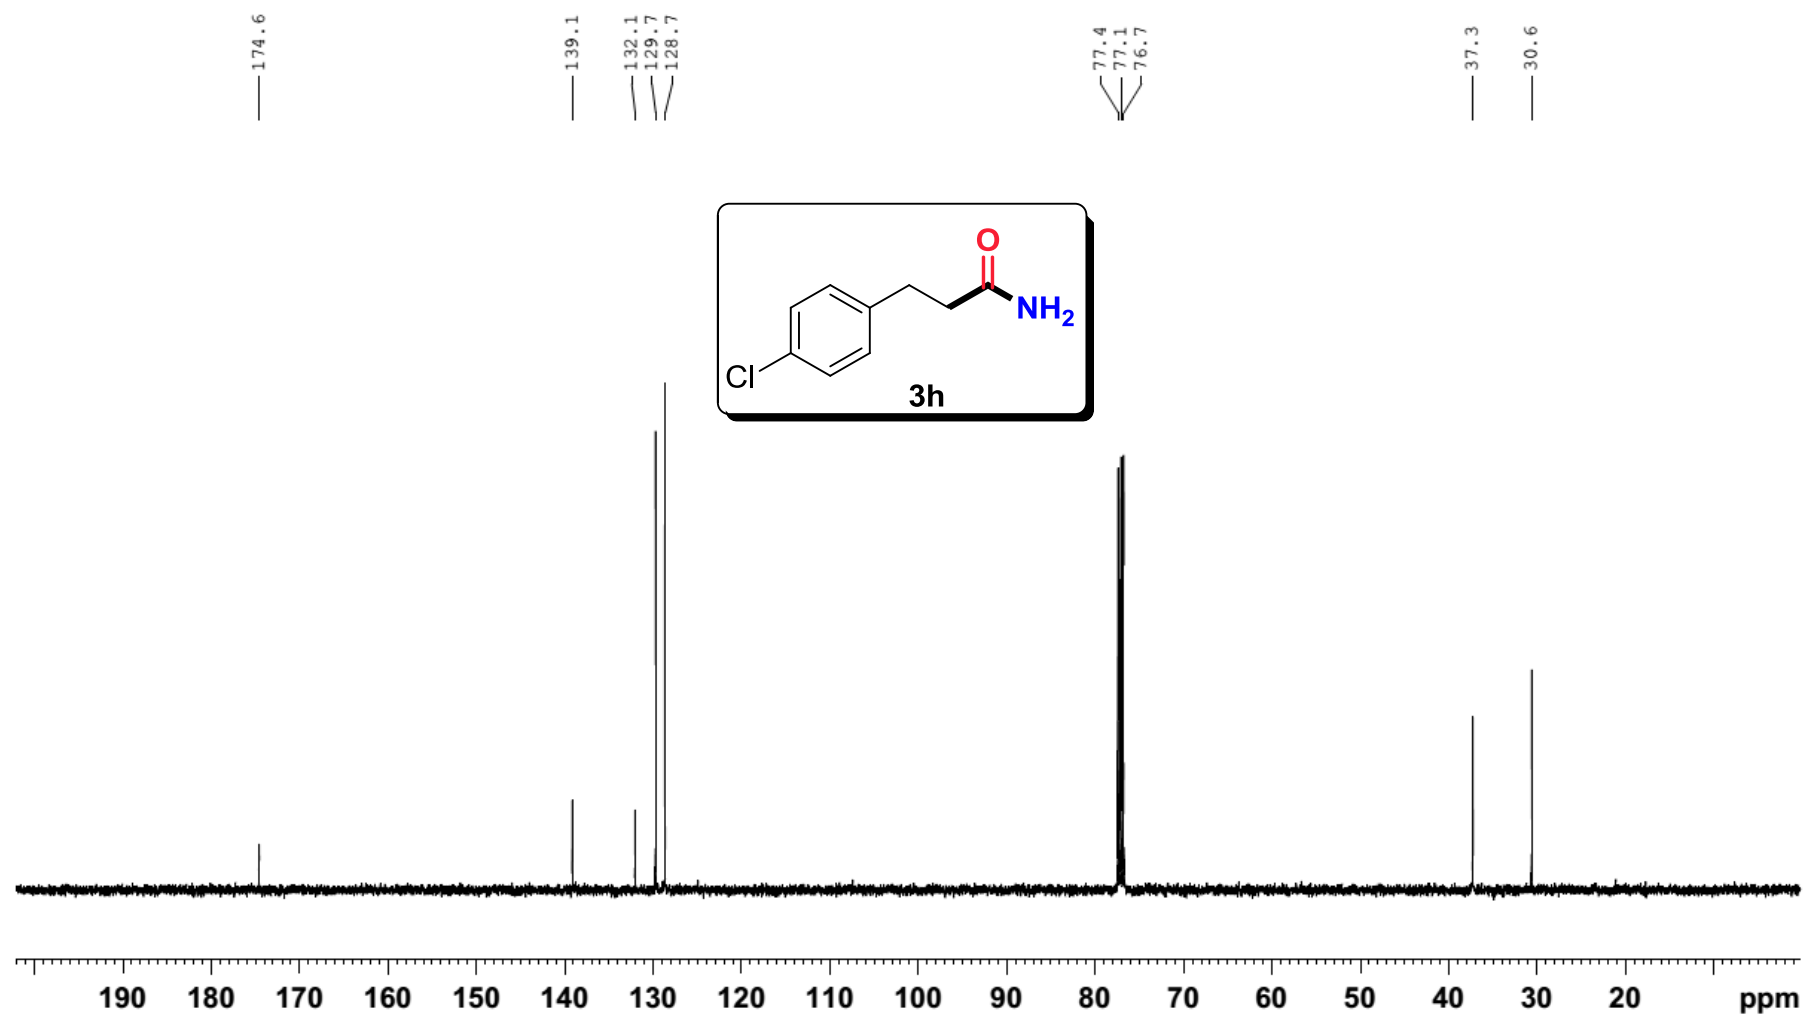

# ZGY-X15X14-2 H NMR

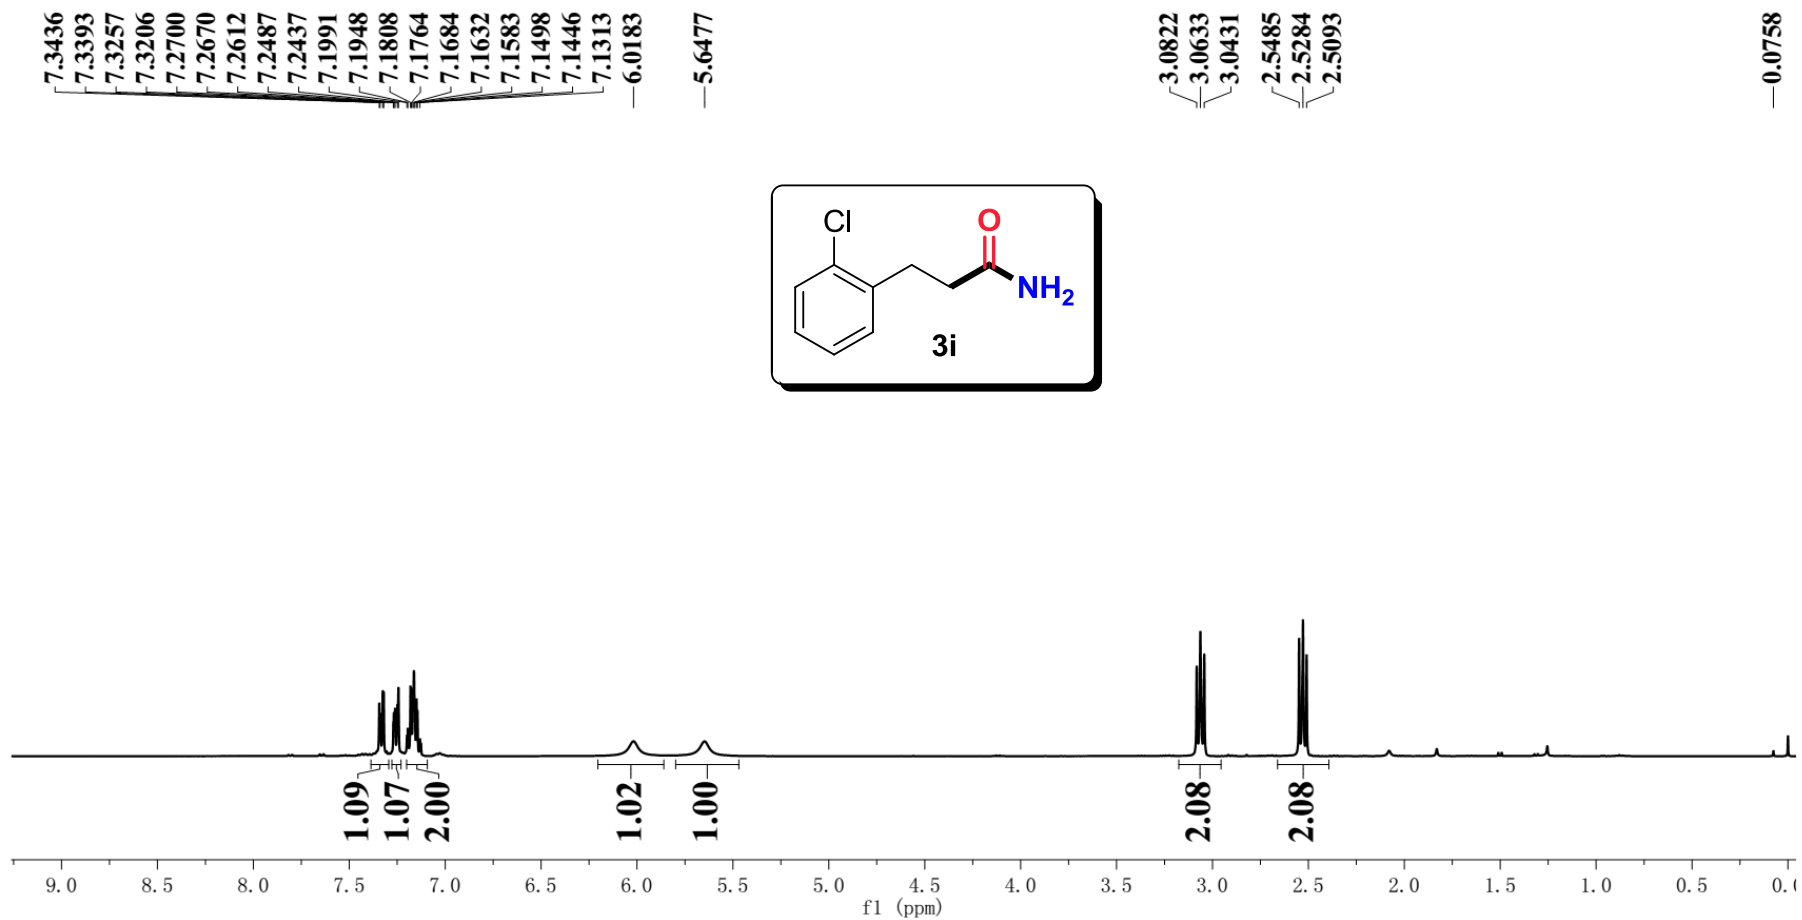

ZGY-X15X13-2-CNMR

— 174.6

— 138.2

— 133.8

— 130.6

— 129.5

— 127.9

— 127.0

— 77.4

— 77.1

— 76.8

— 35.5

— 29.4

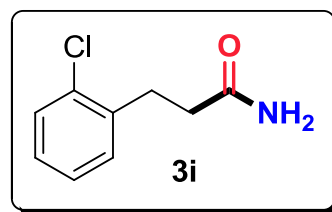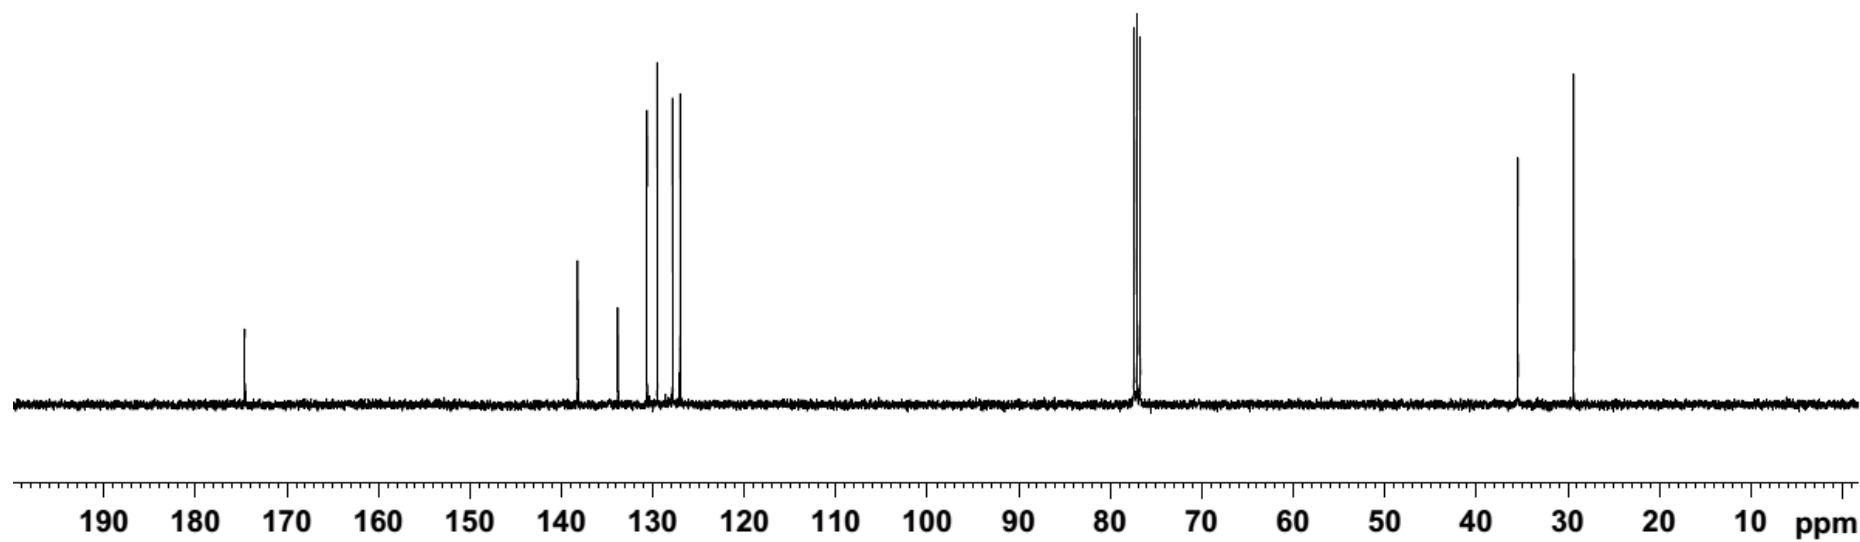

ZJP-X160113-2-HNMR

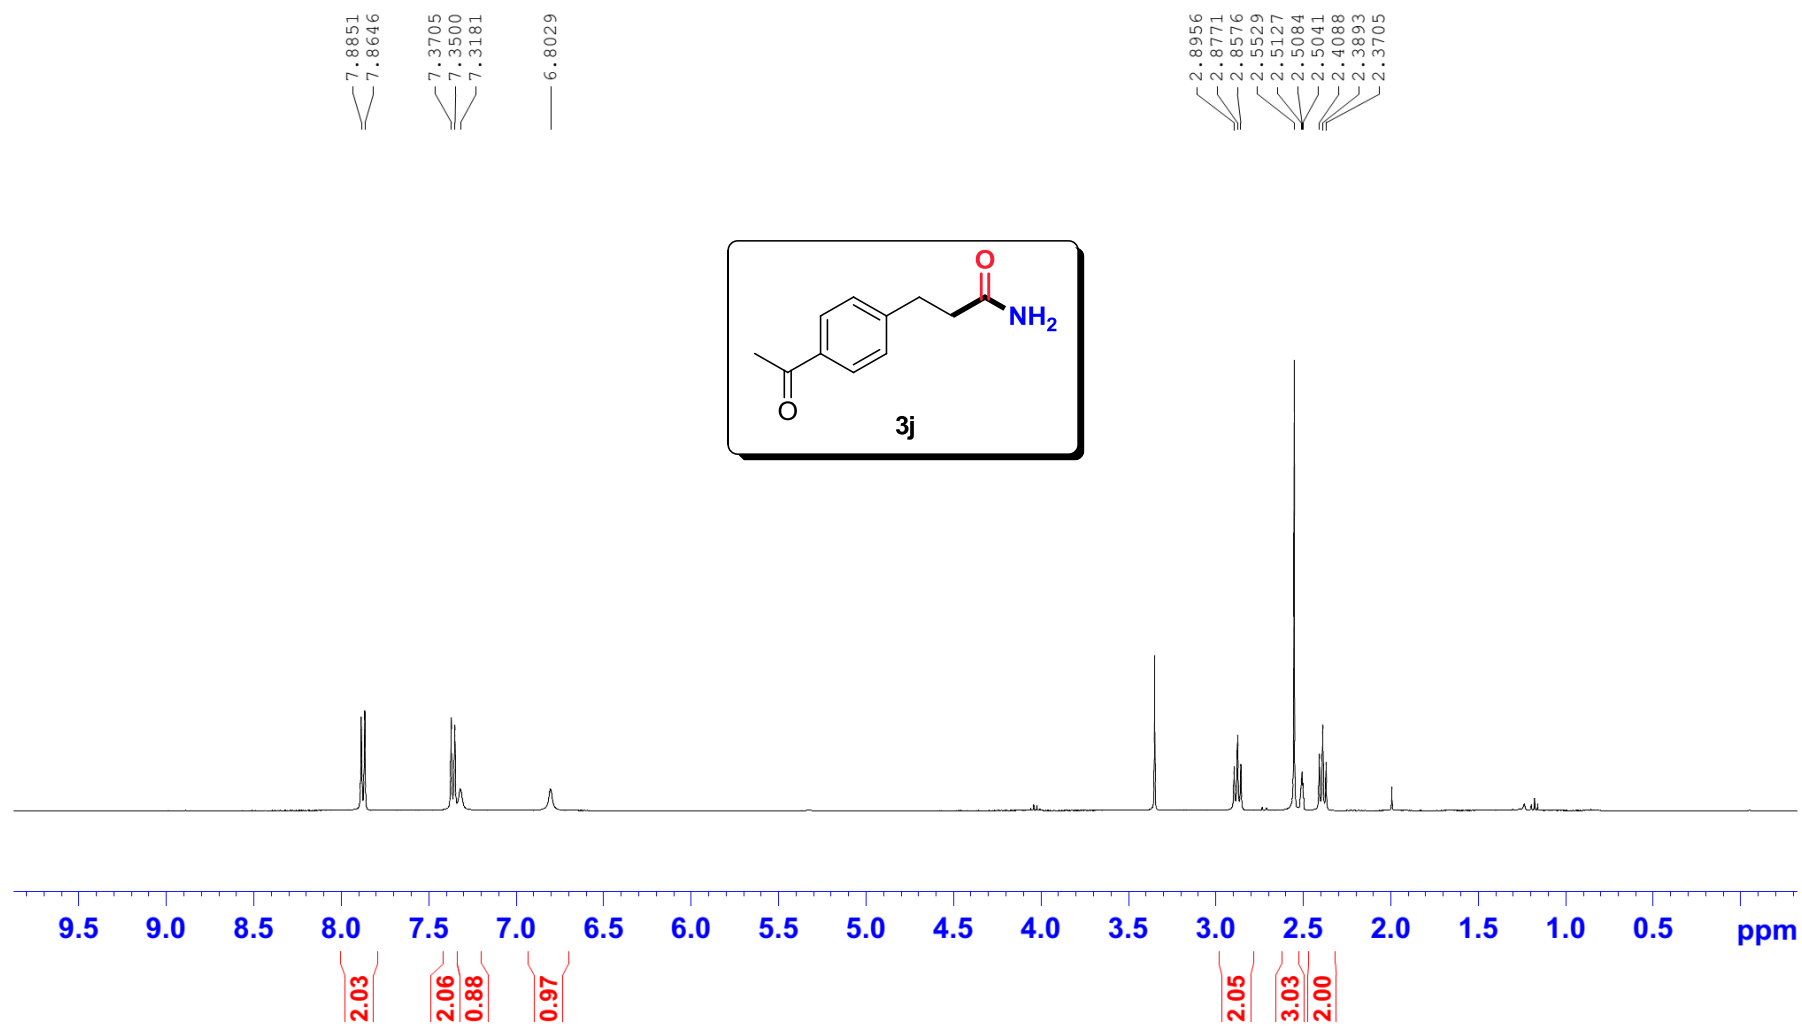

ZJP-X160113-2-CNMR

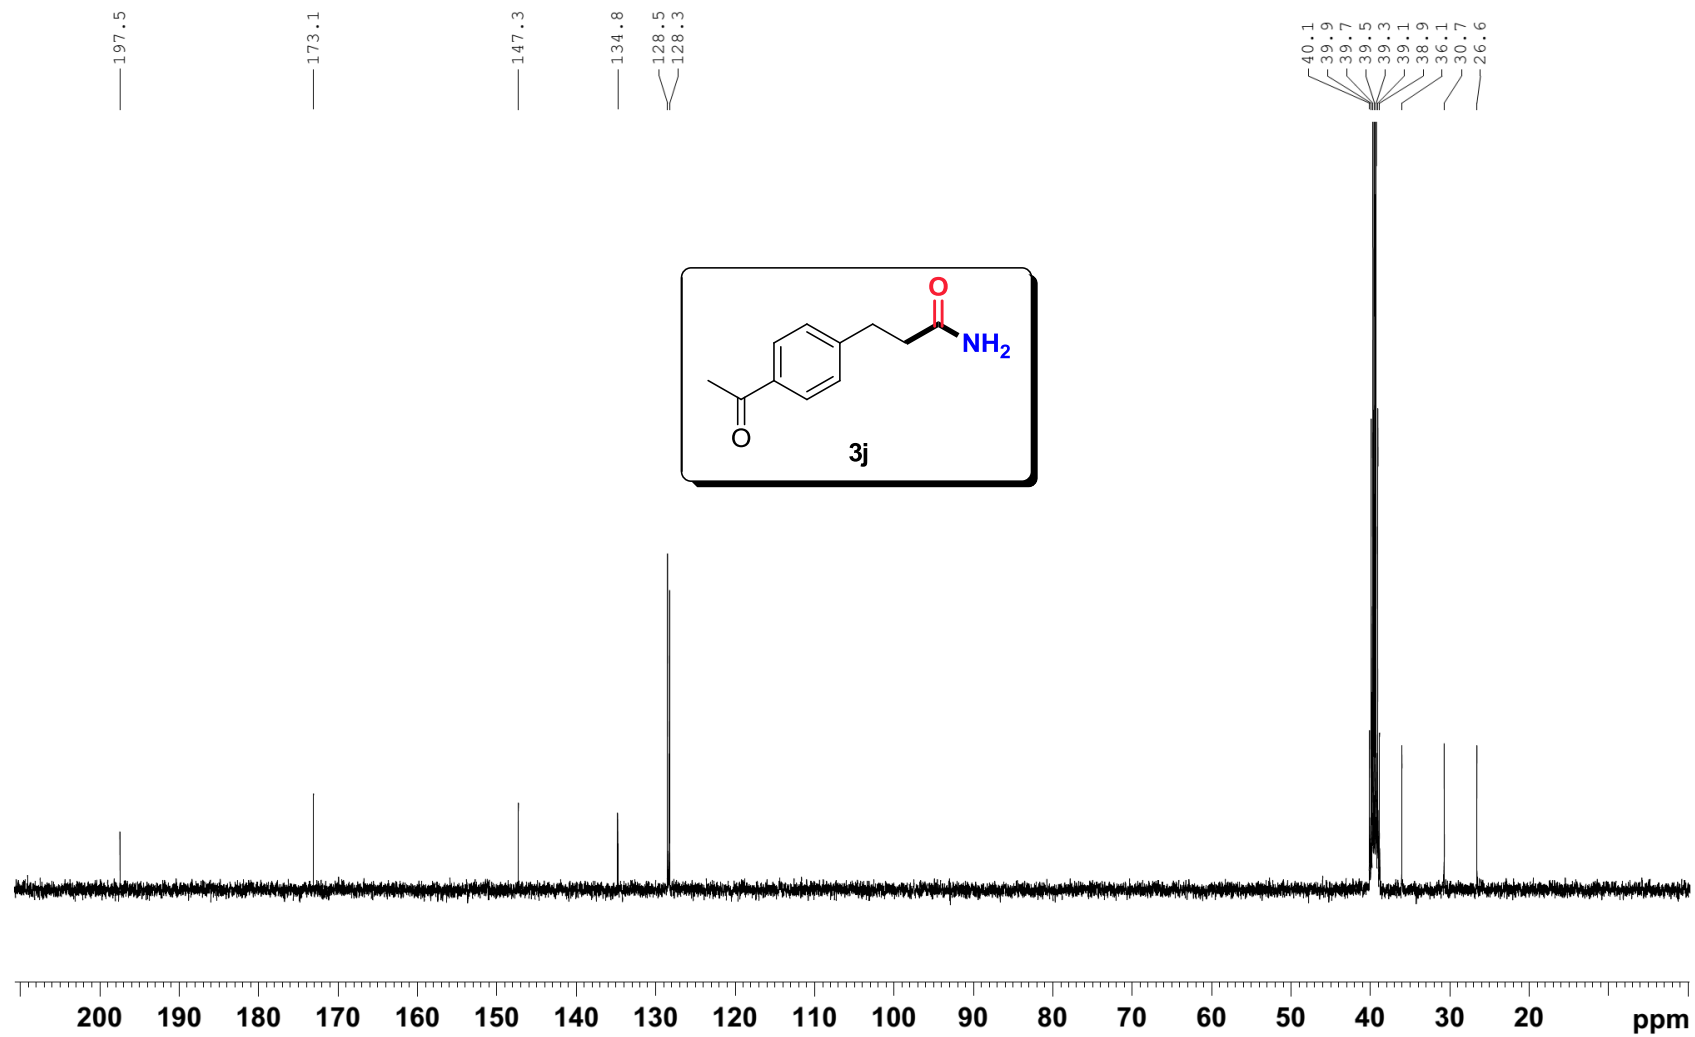



ZGY-X15X03-1-HNMR

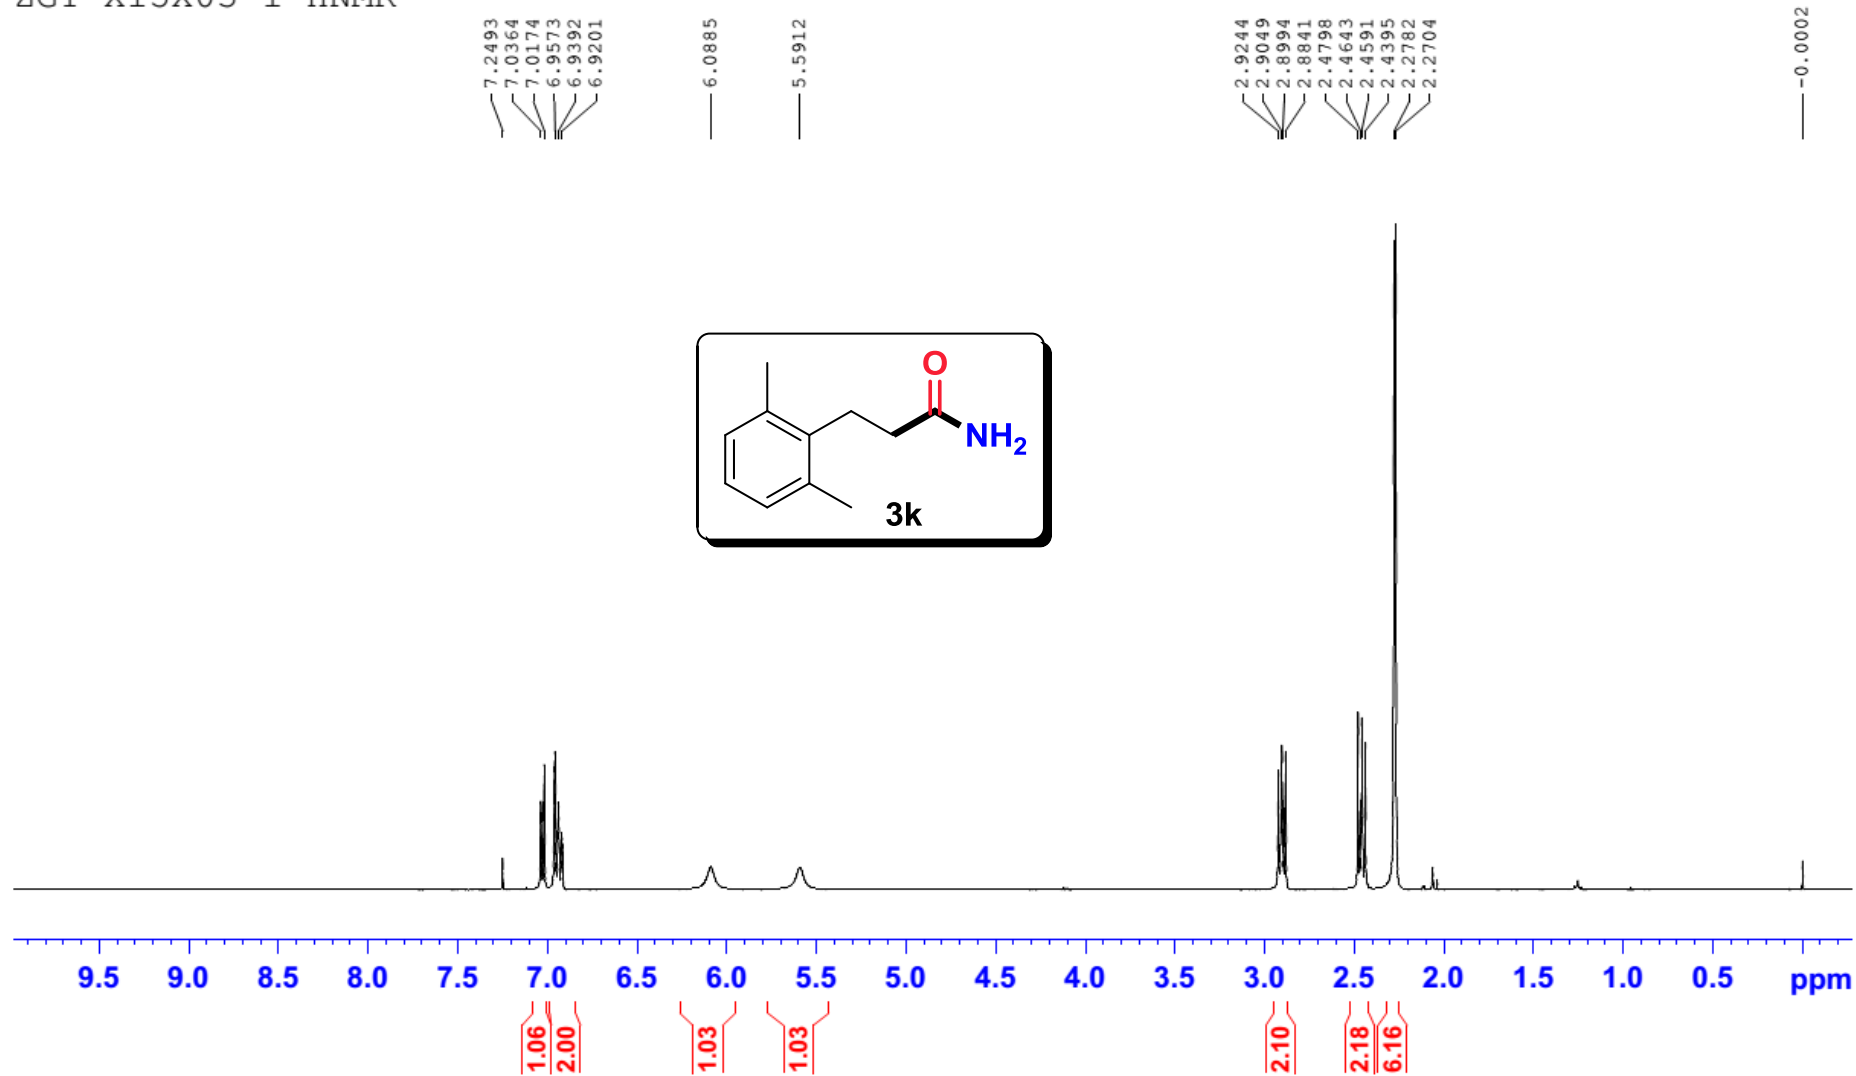

ZGY-X15X03-1-CNMR

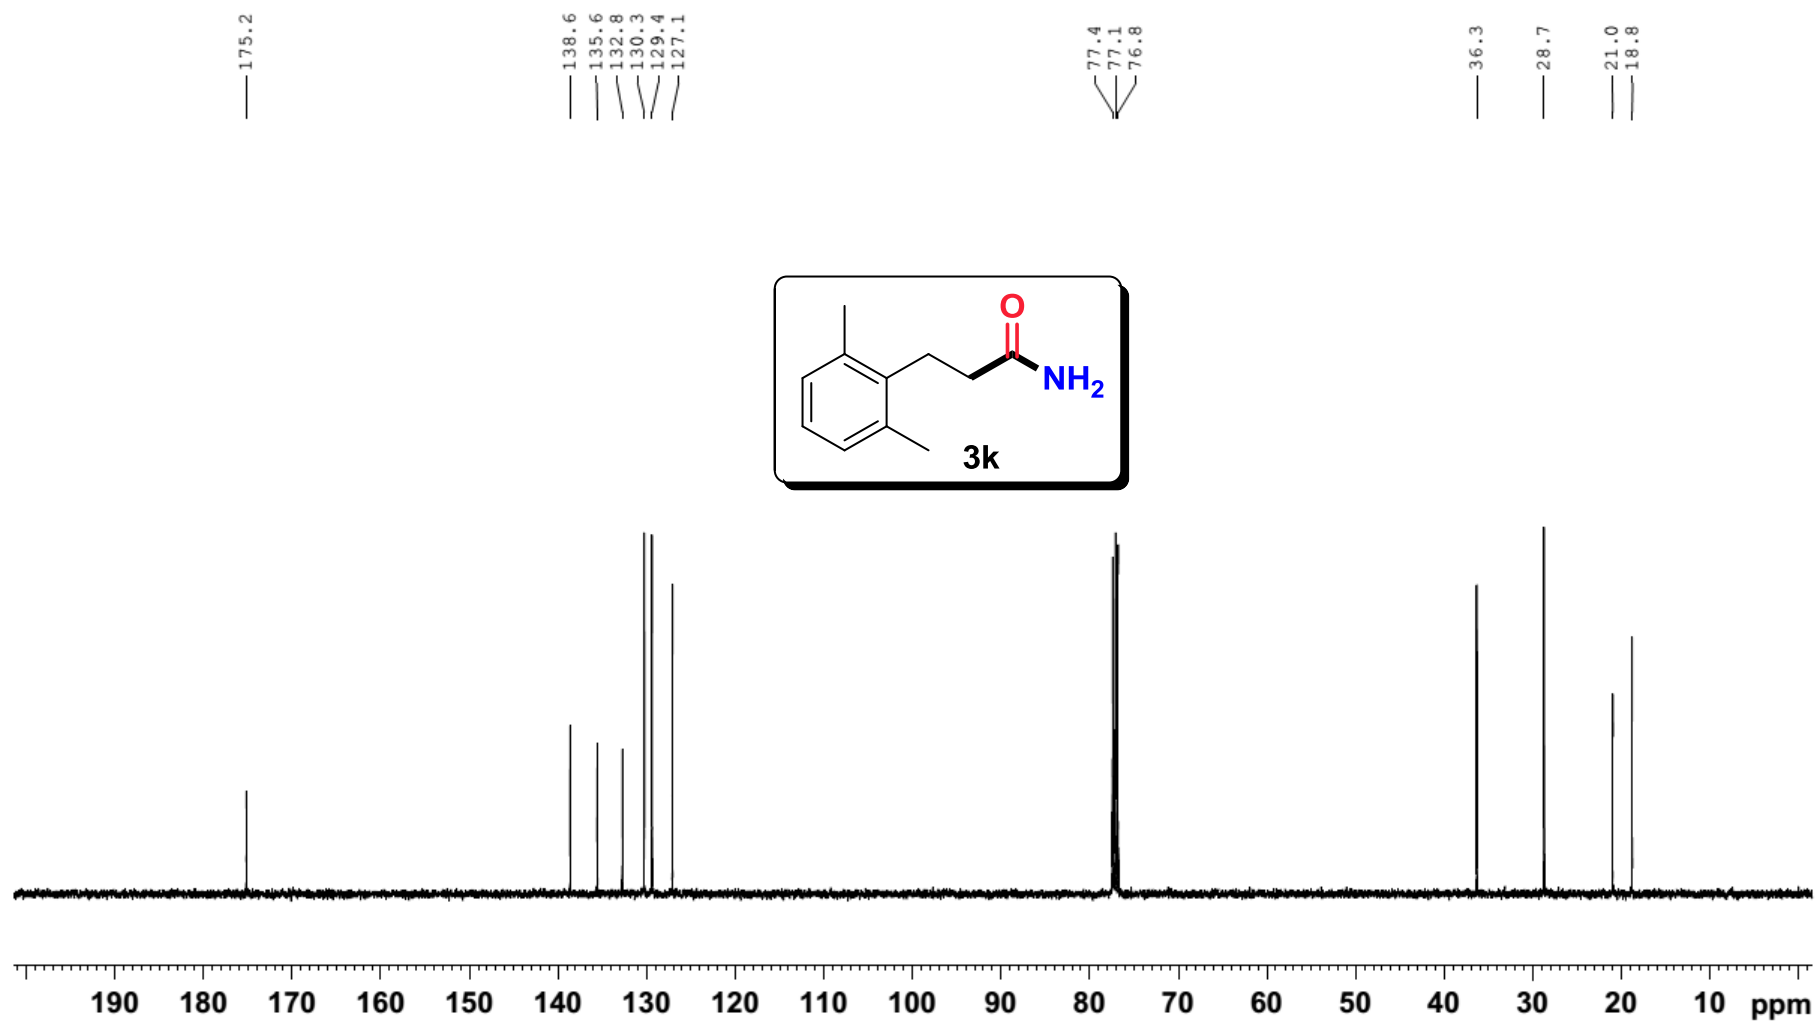

ZGY-X15X12-1-HNMR

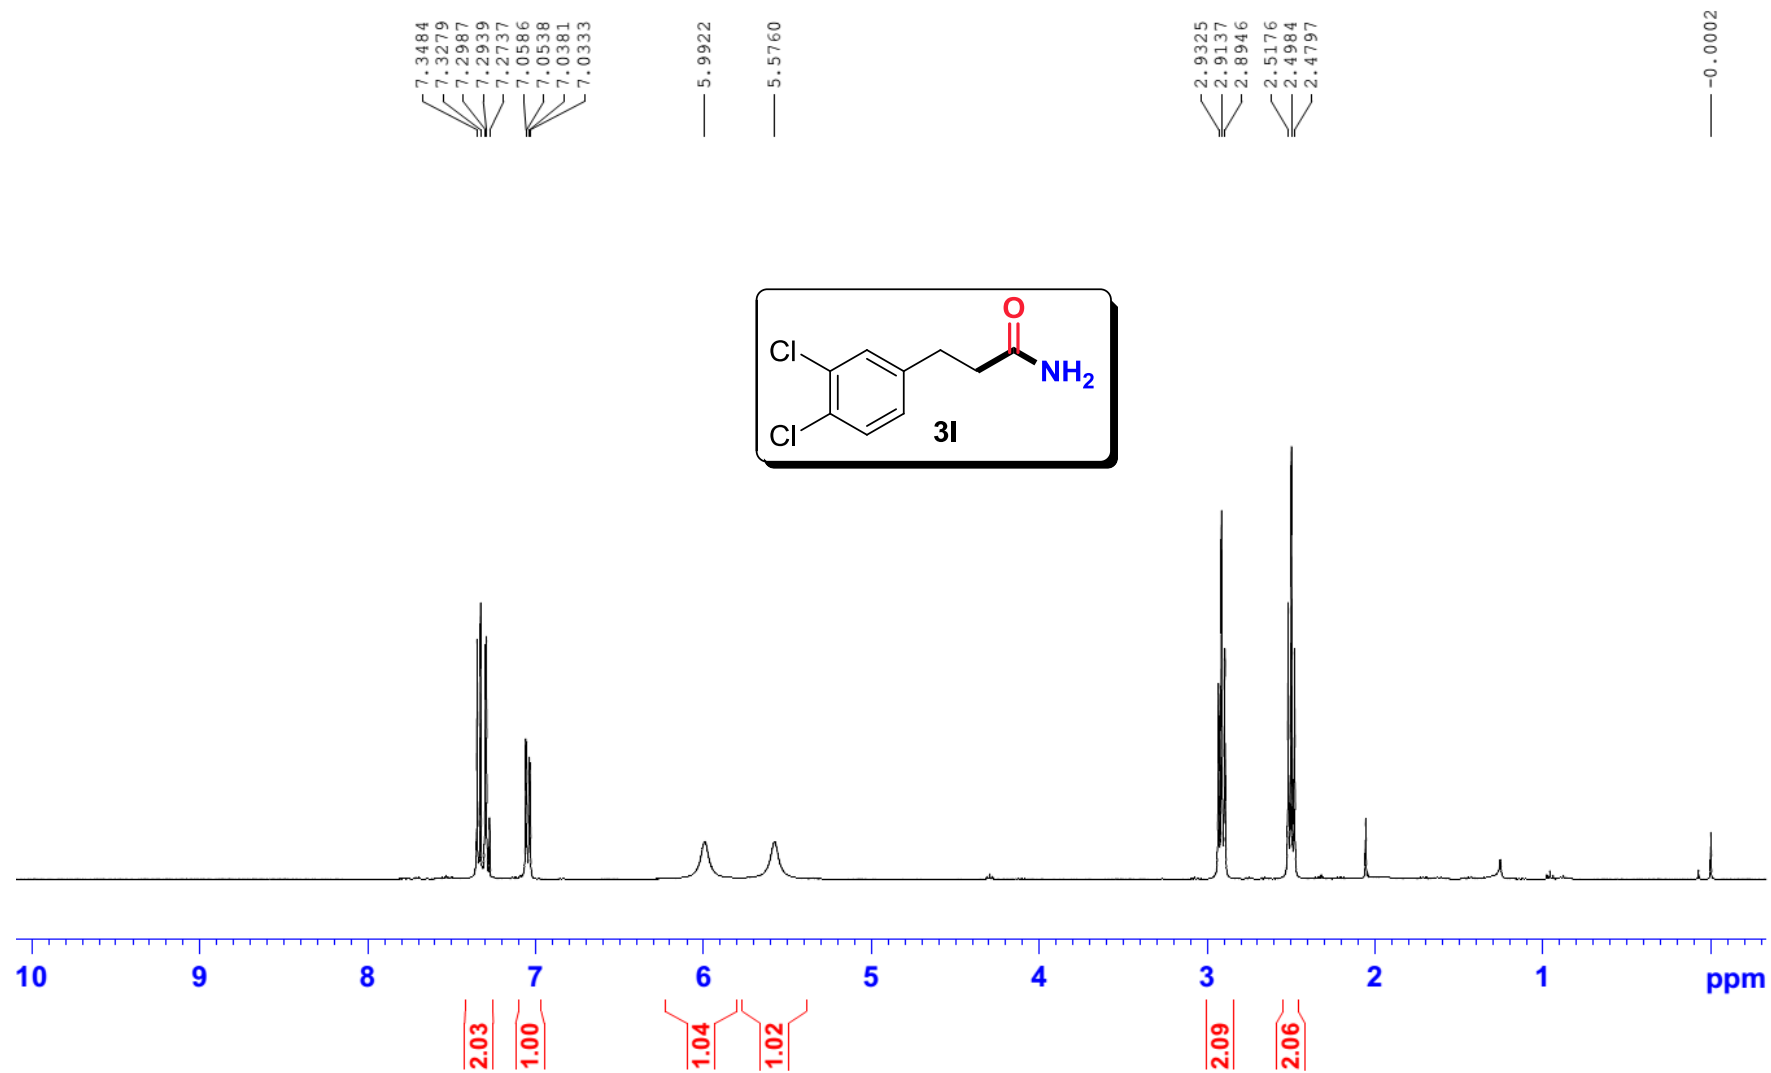

ZGY-X15X12-1-CNMR

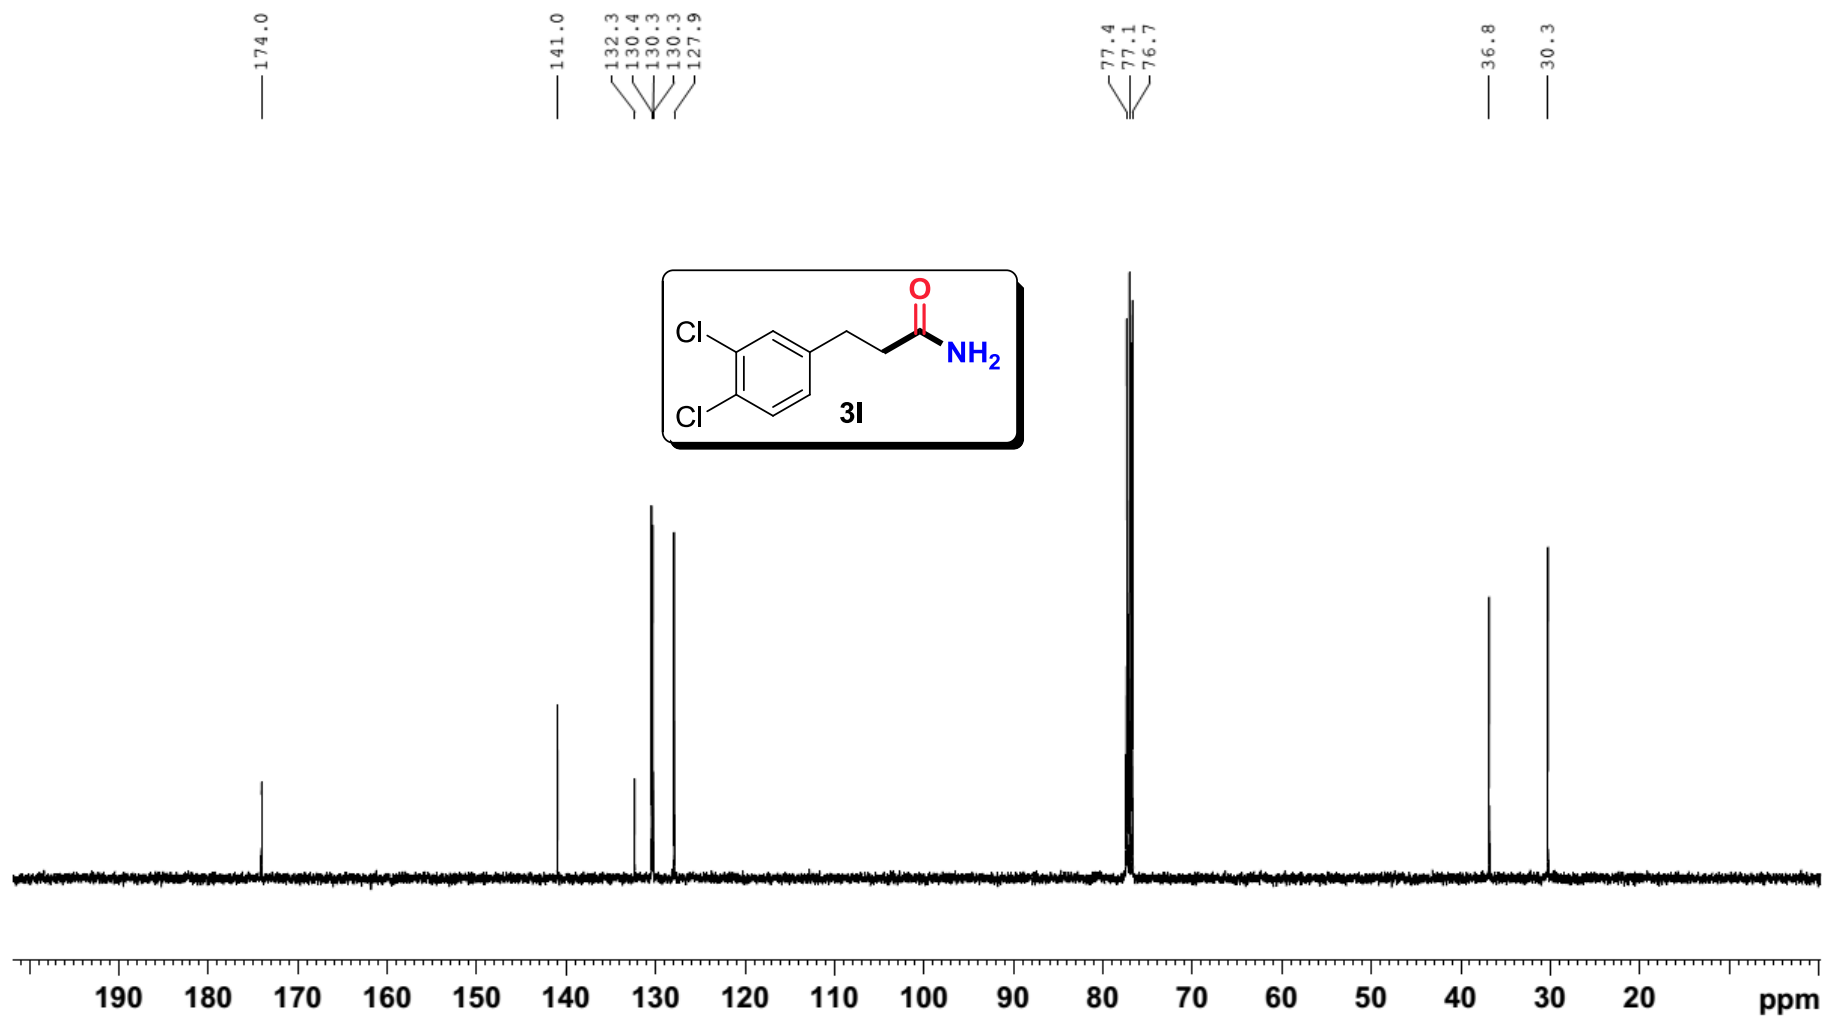

ZGY-X15X15-4-HNMR

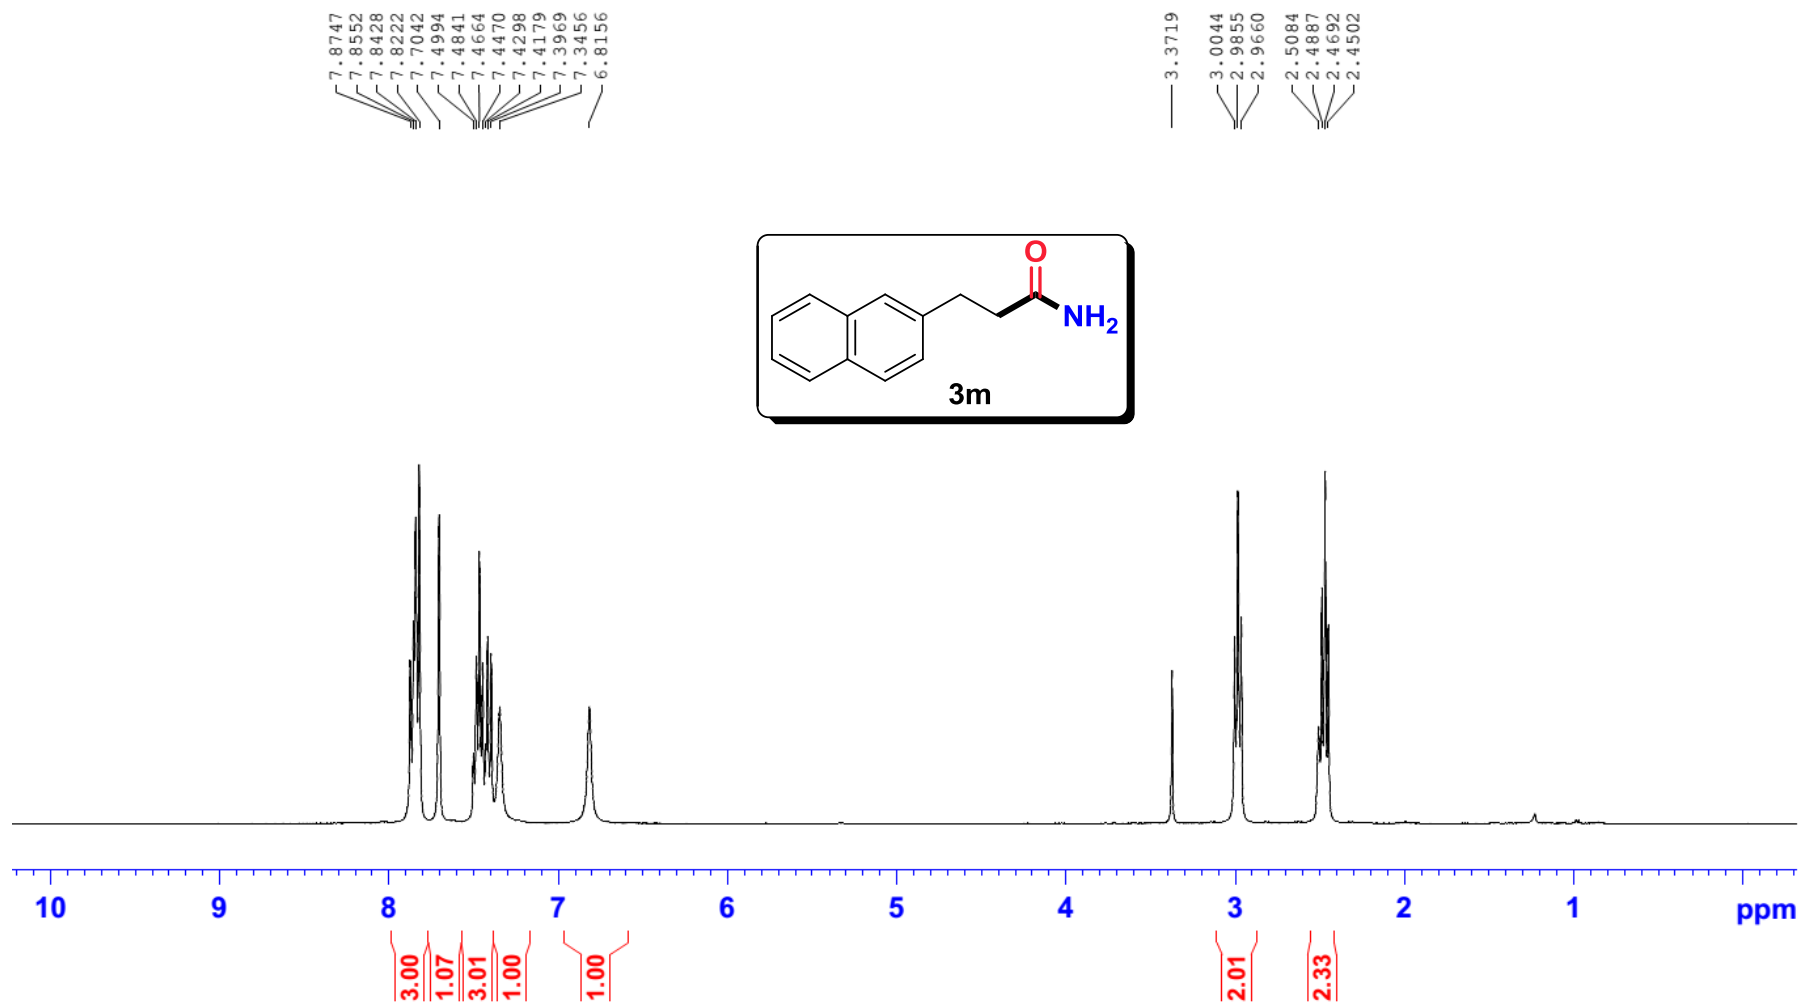

ZGY-X15X15-2-CNMR

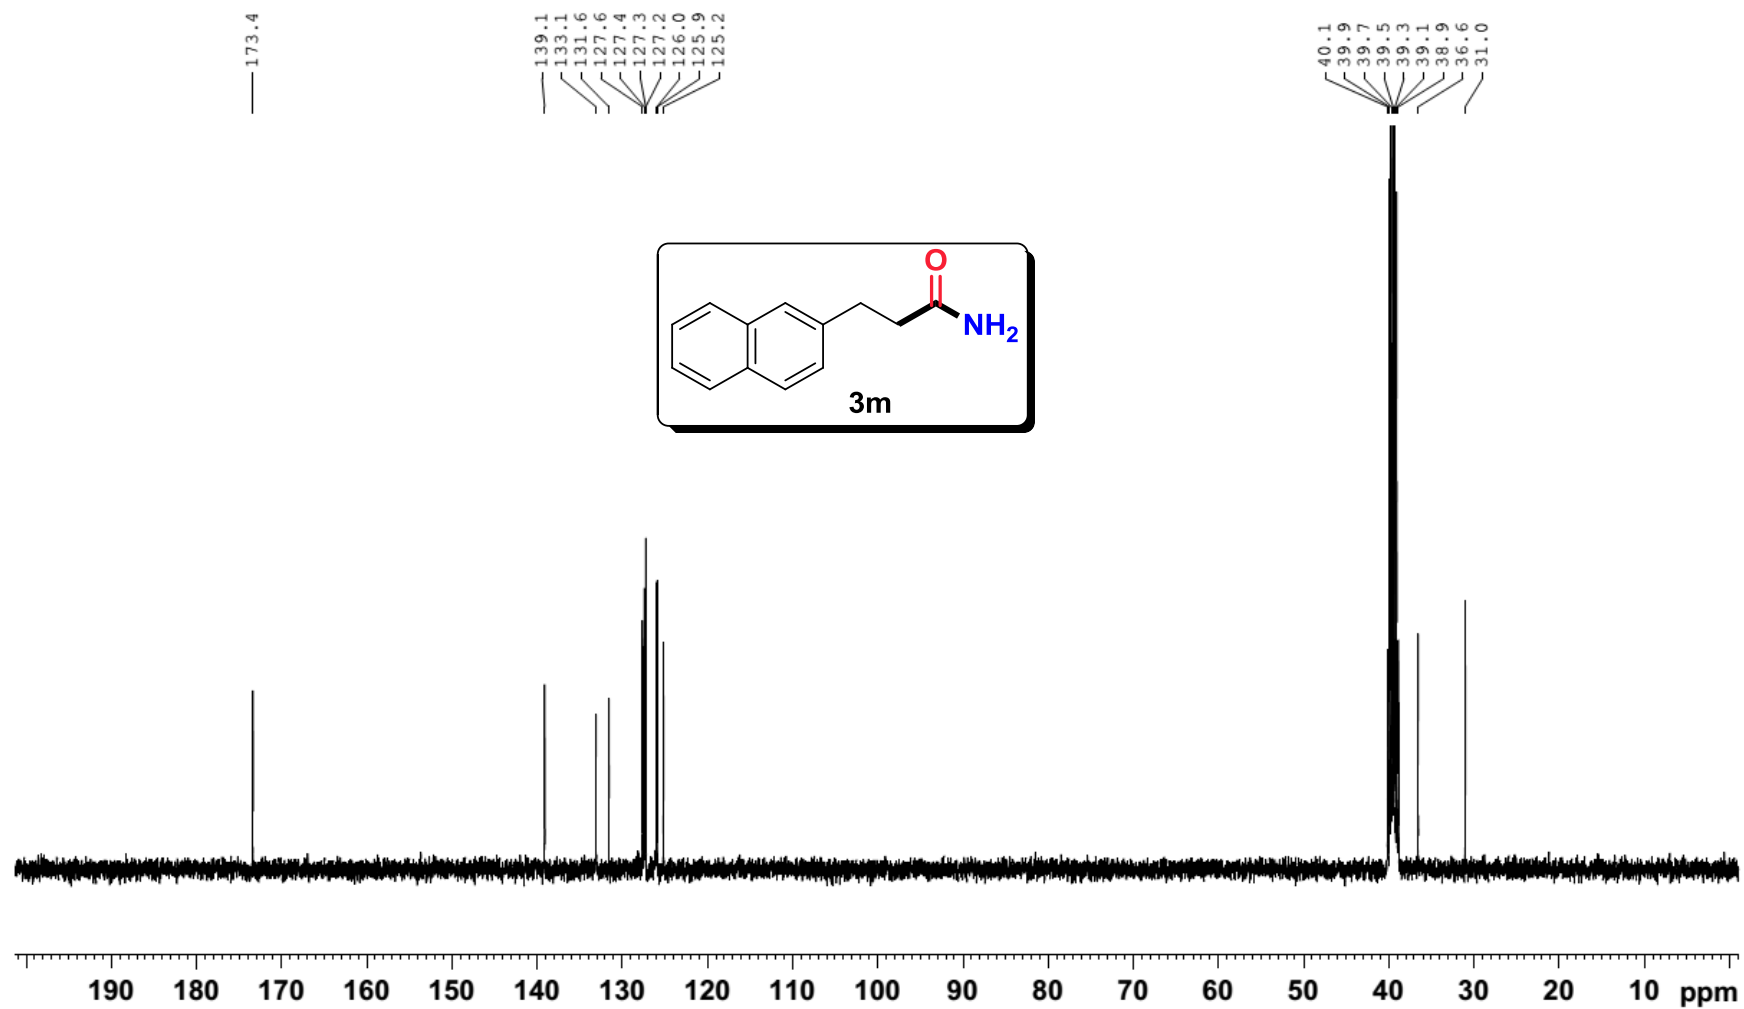

ZGY-X15X15-3-HNMR

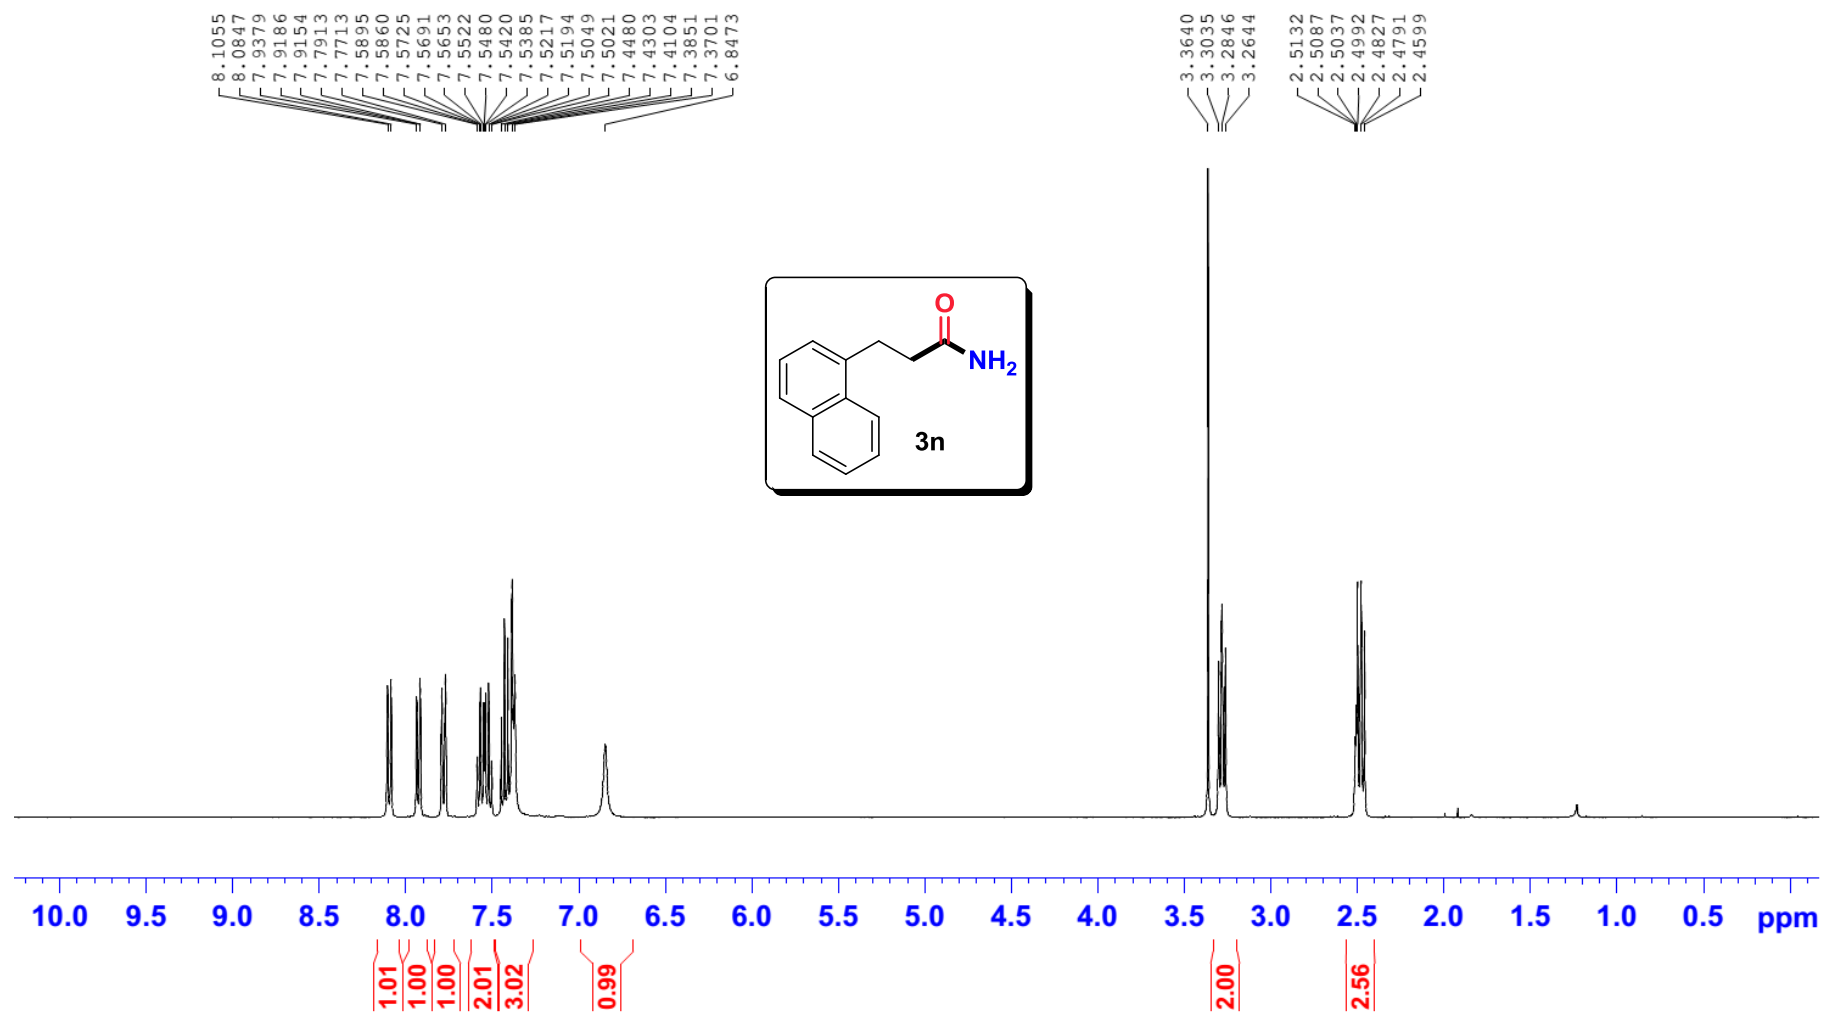

ZGY-X15X15-3-CNMR

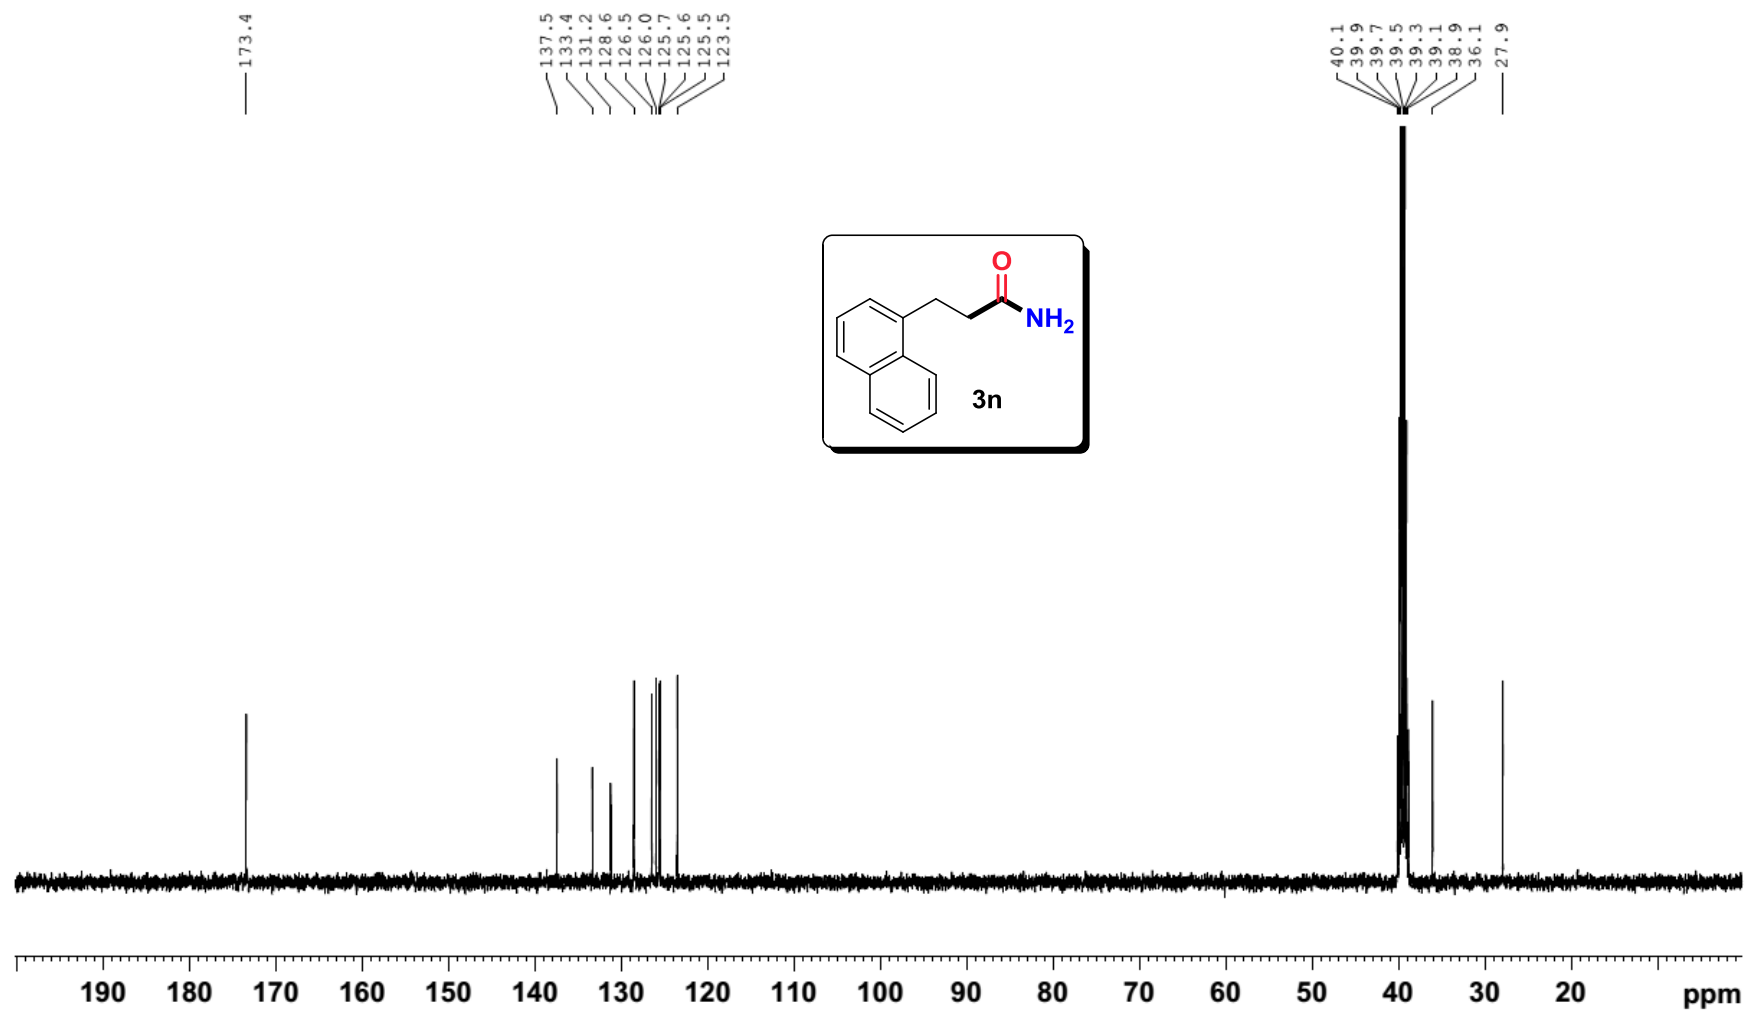



ZGY-X15X28-1-HNMR

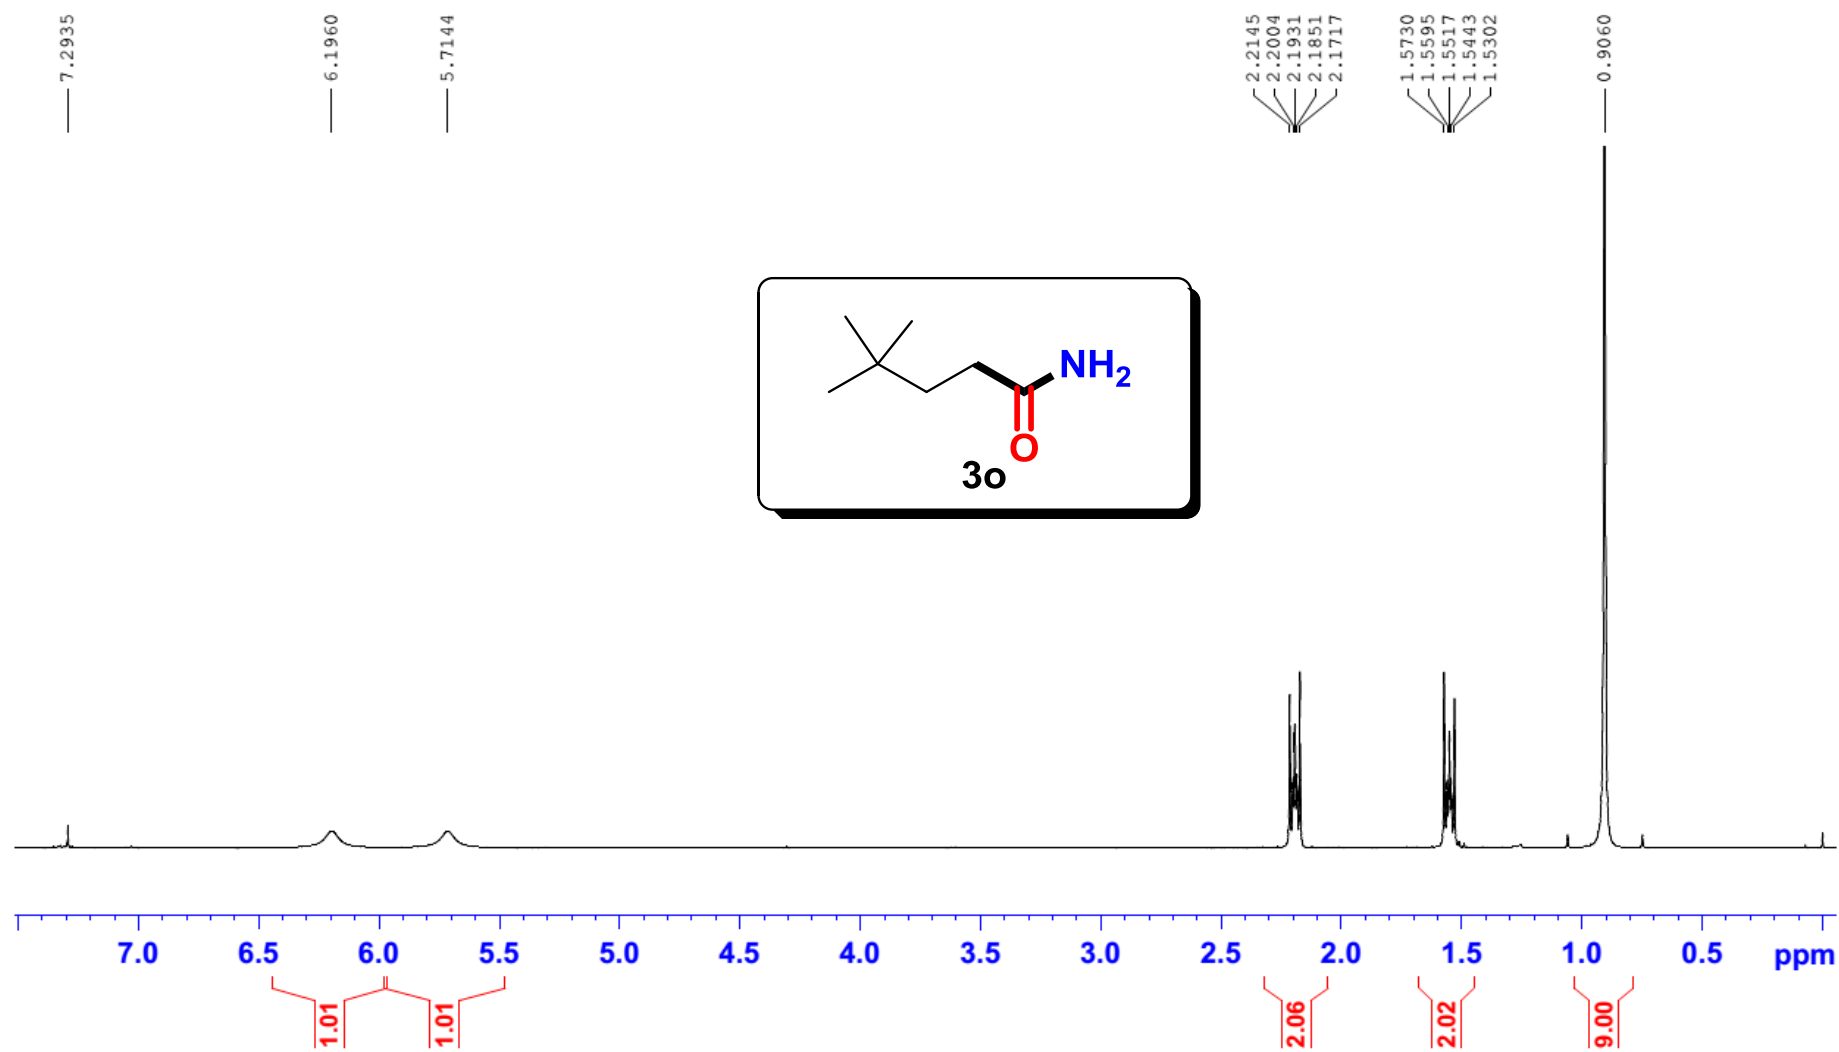

ZGY-X15X28-1-CNMR

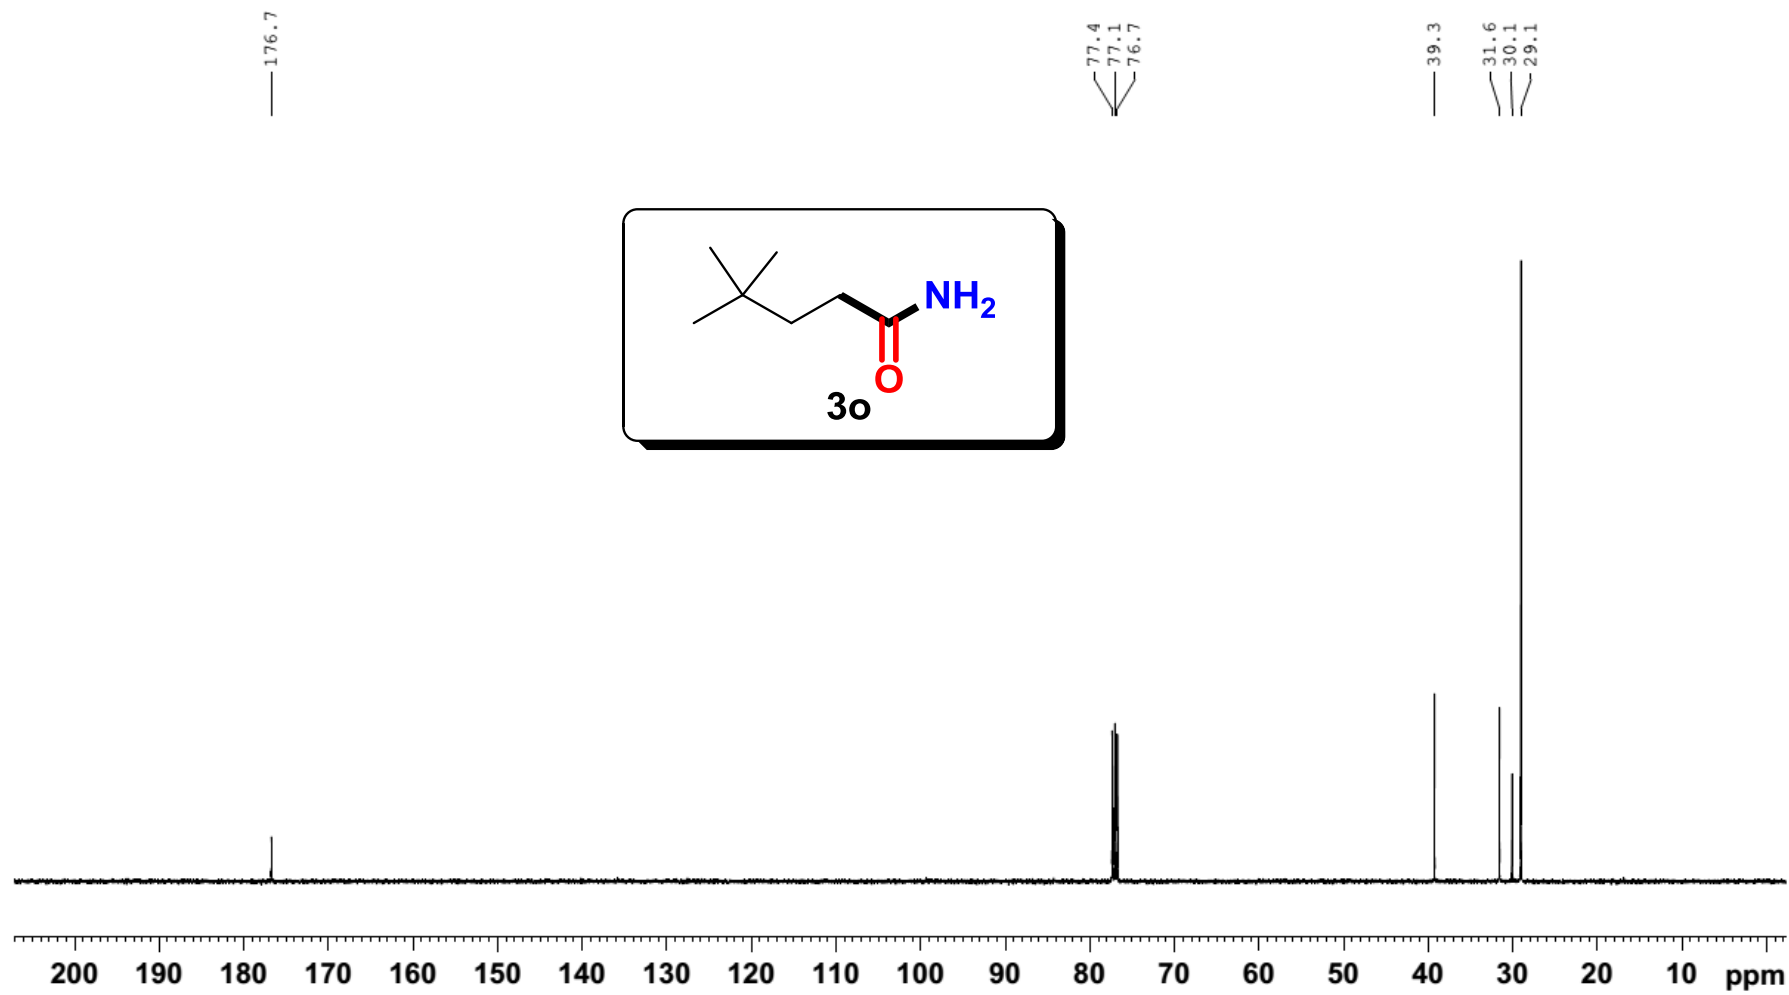

ZGY-X15X07-1-HNMR

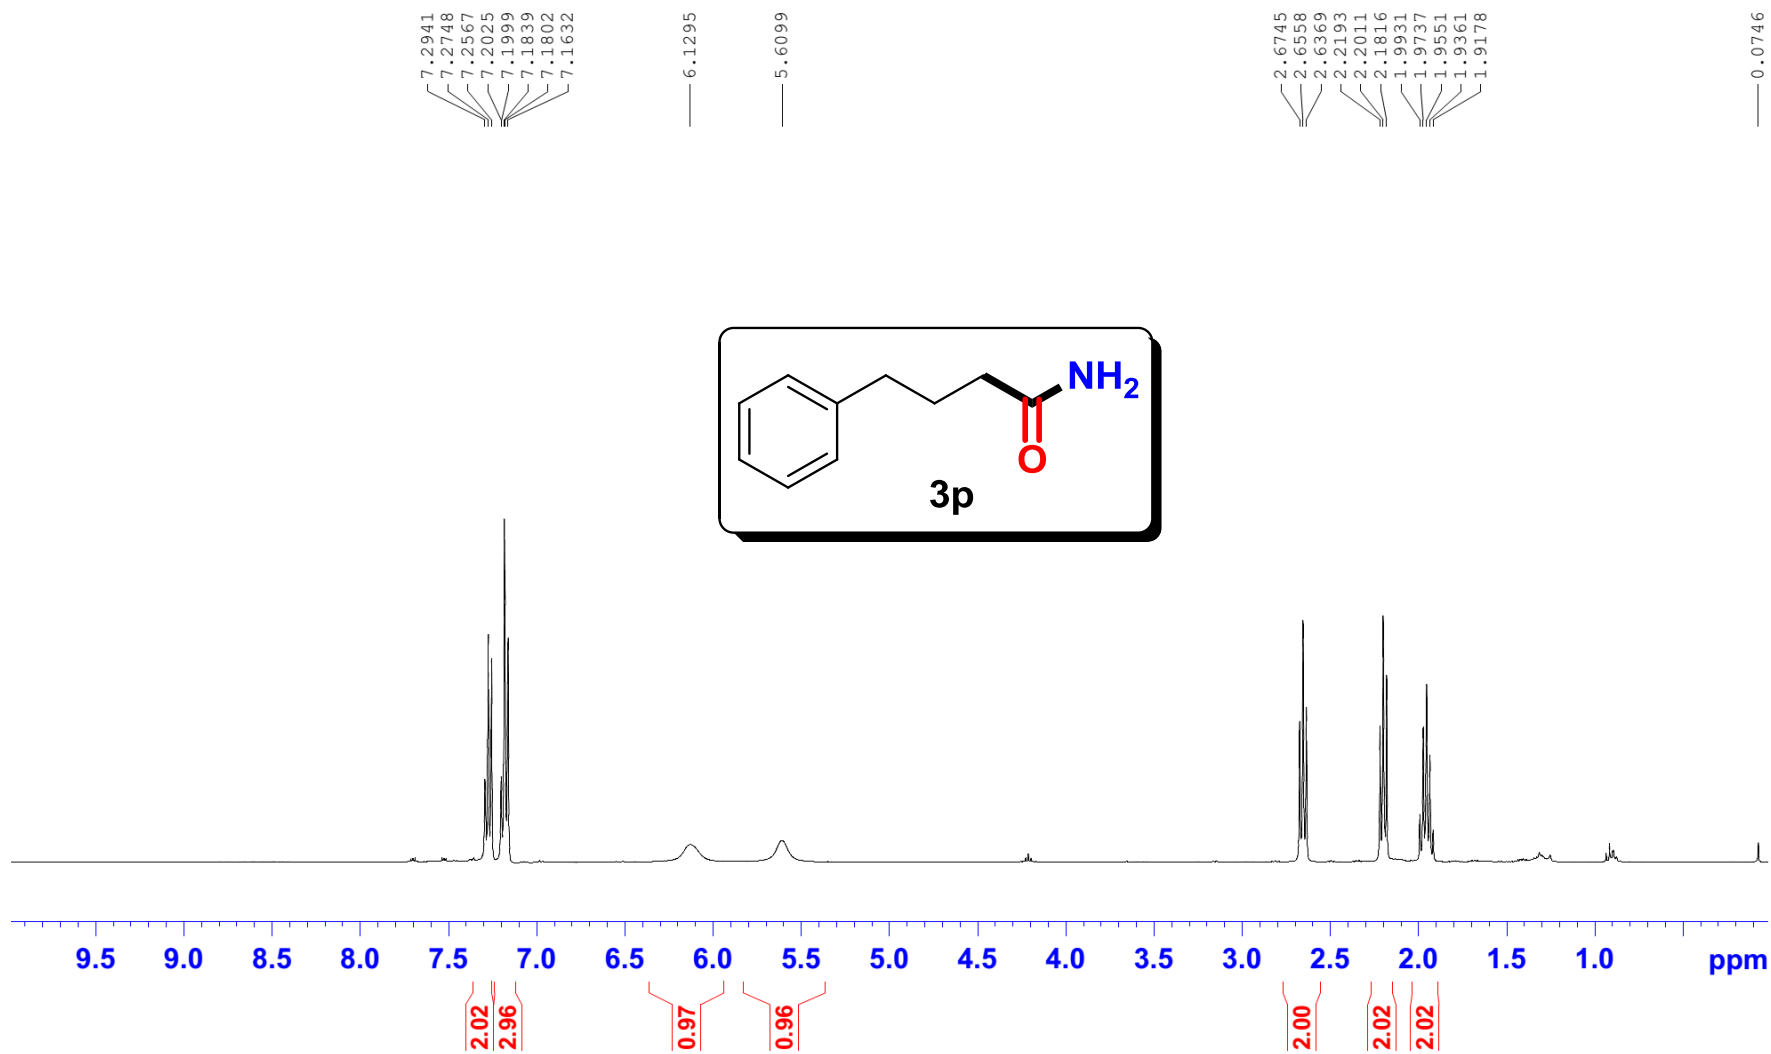

ZGY-X15X07-1-CNMR

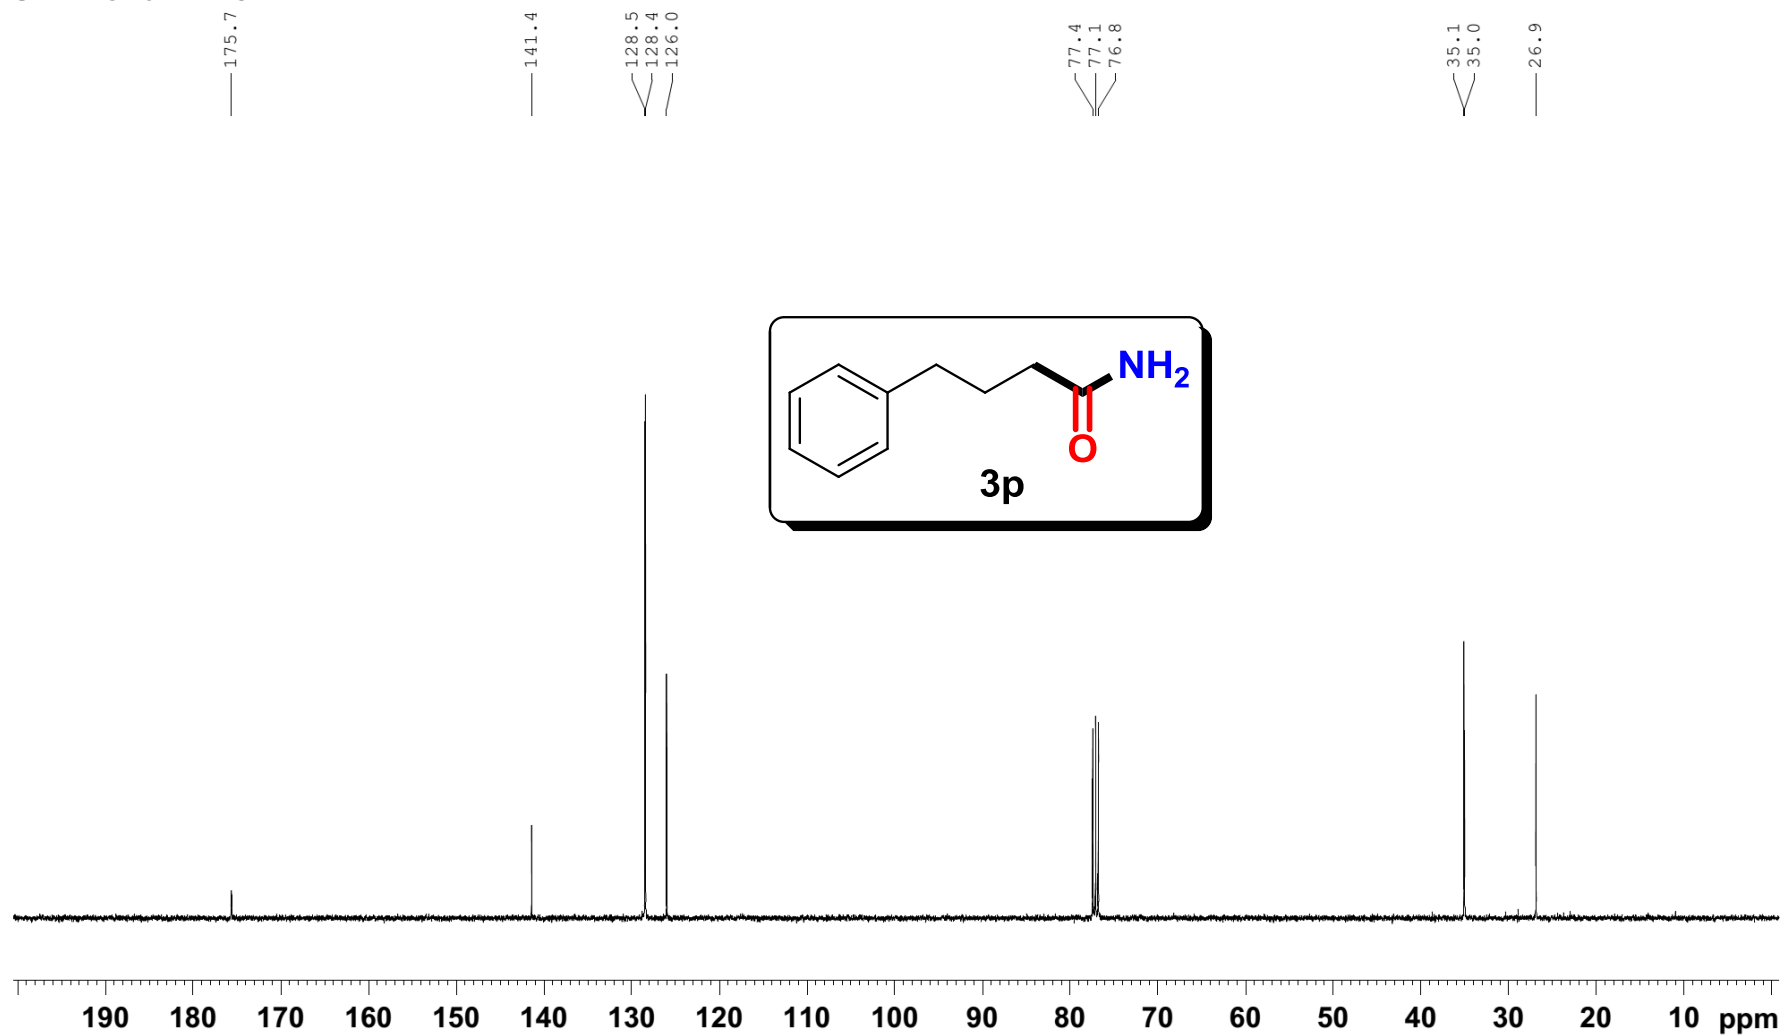

ZJP-X160914-3-HNMR

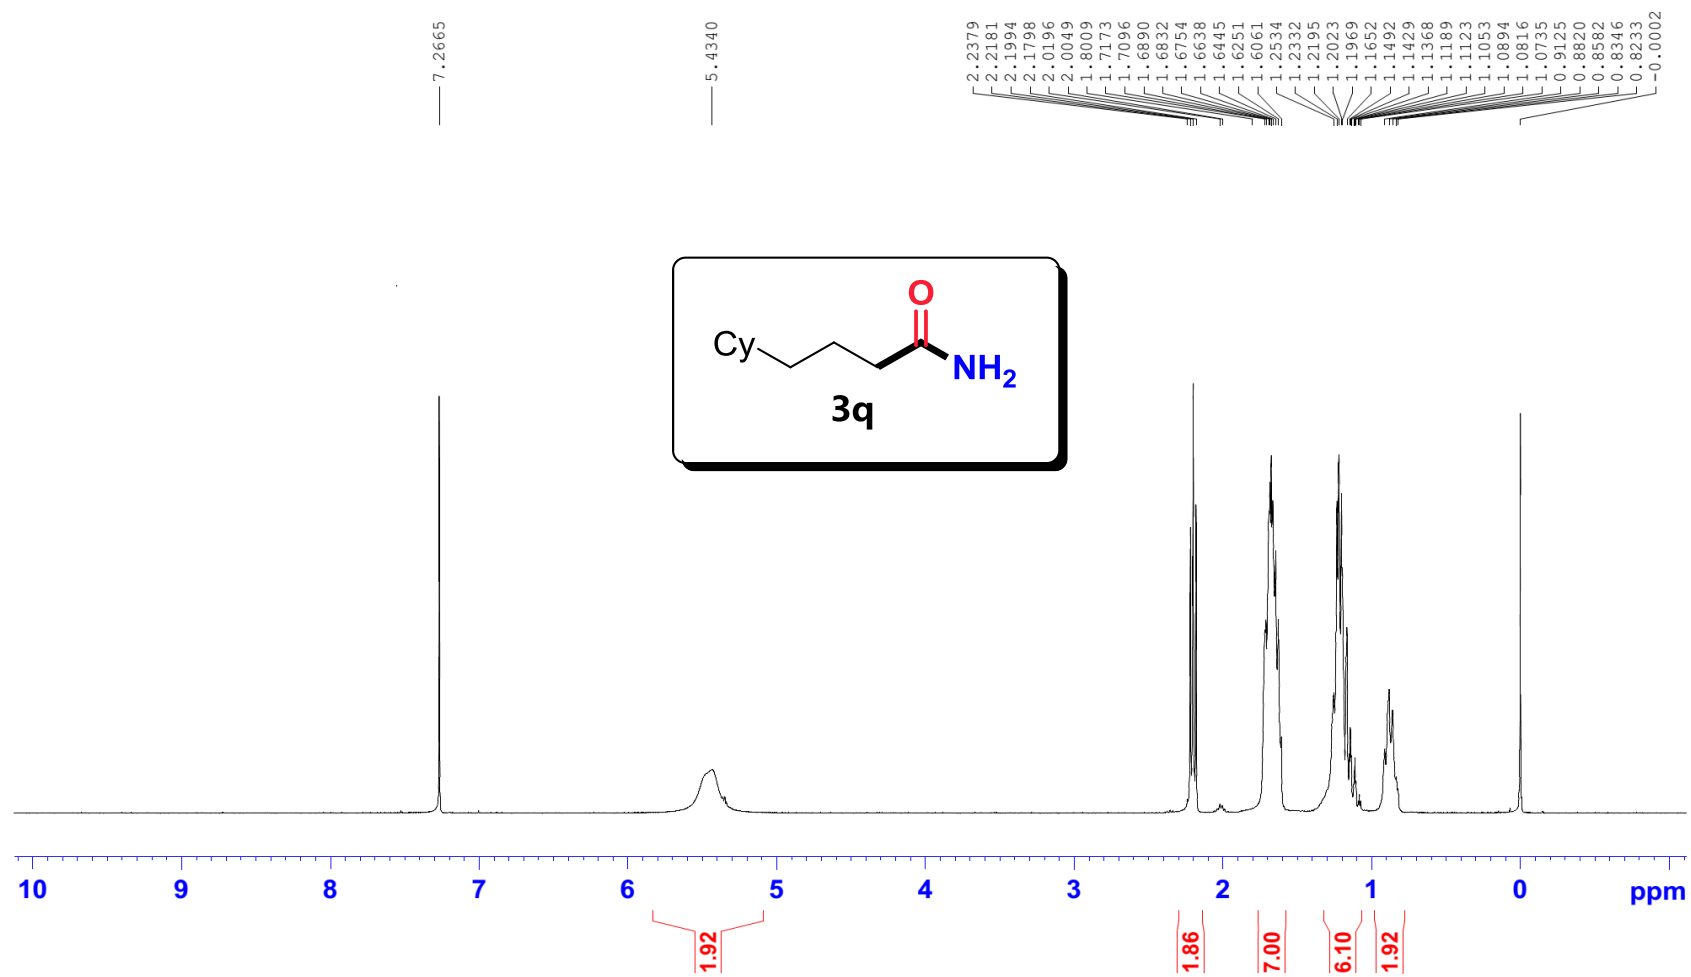

ZJP-X160914-3-CNMR

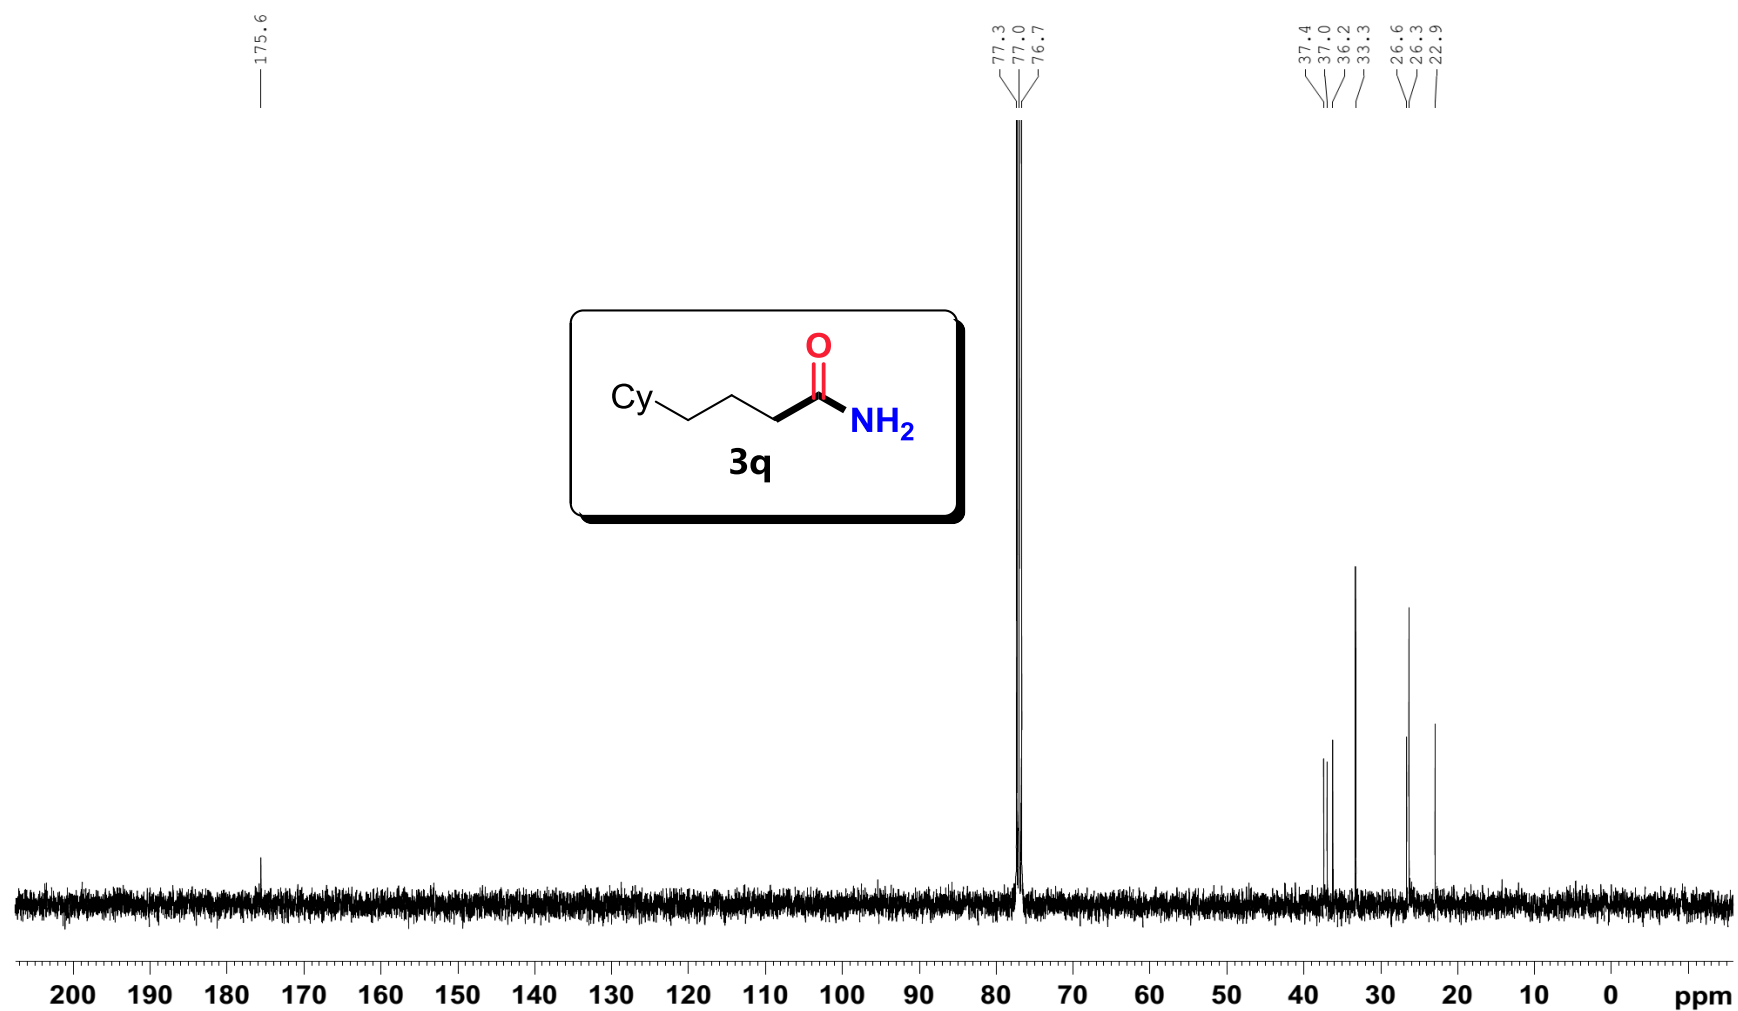

ZJP-X160914-2-HNMR-d6-DMSO

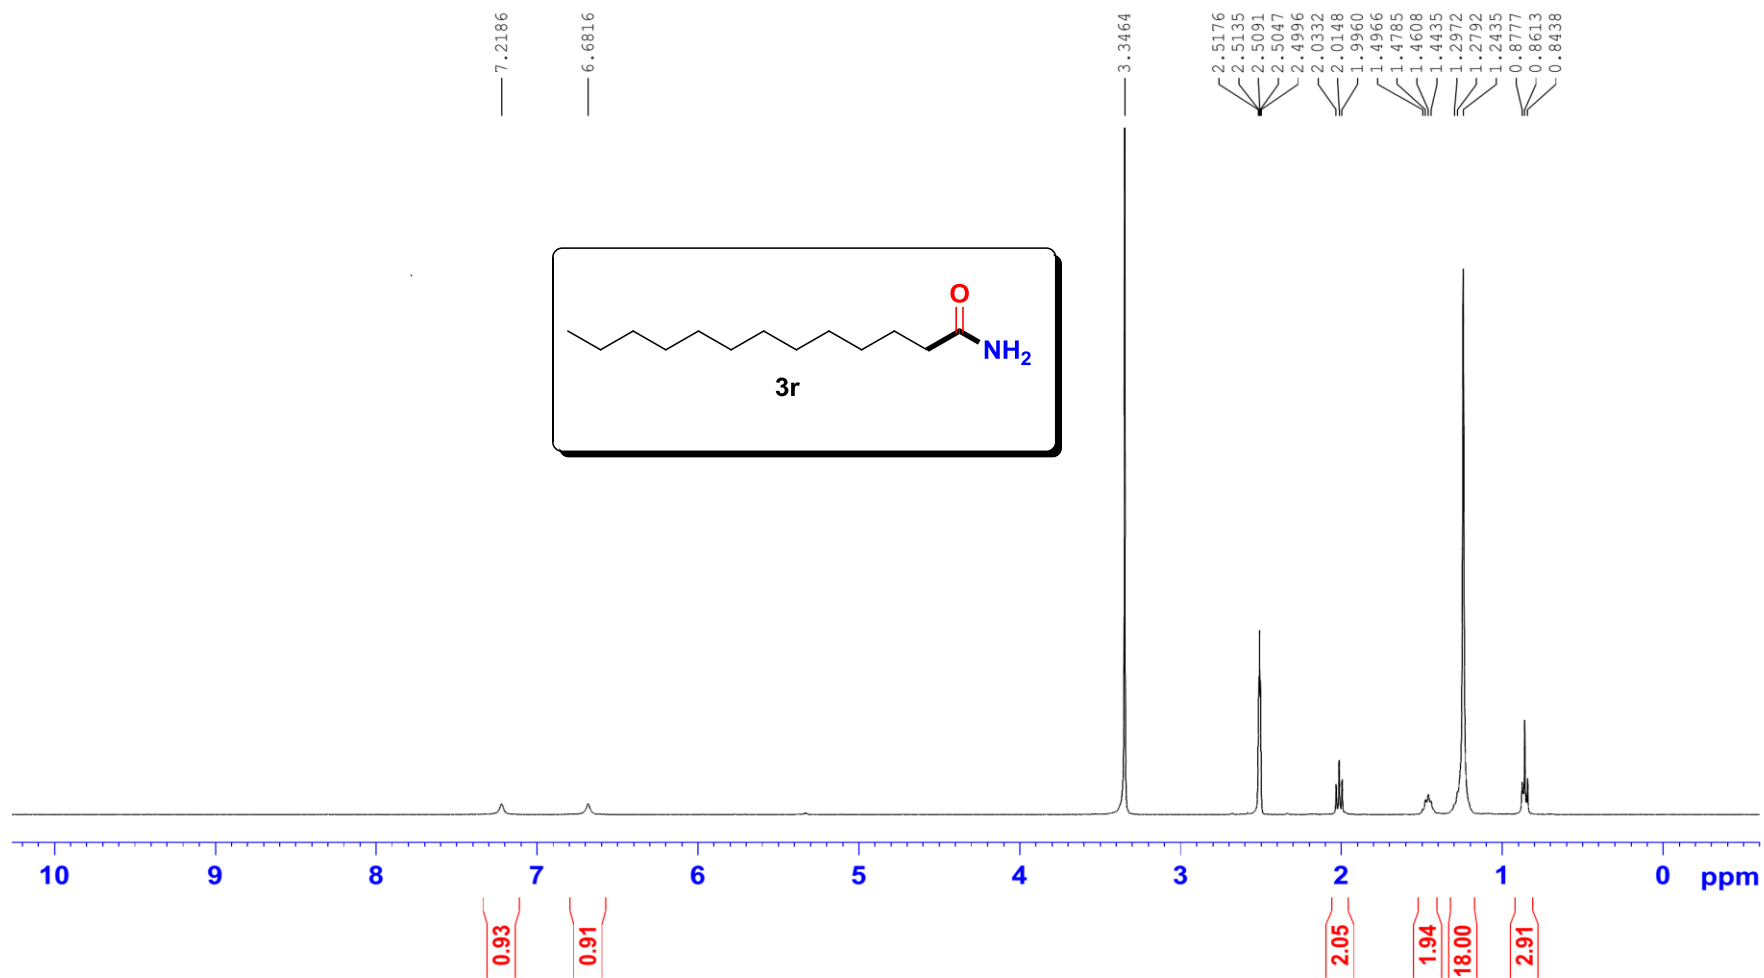

ZJP-X160926-2-CNMR-d6-DMSO

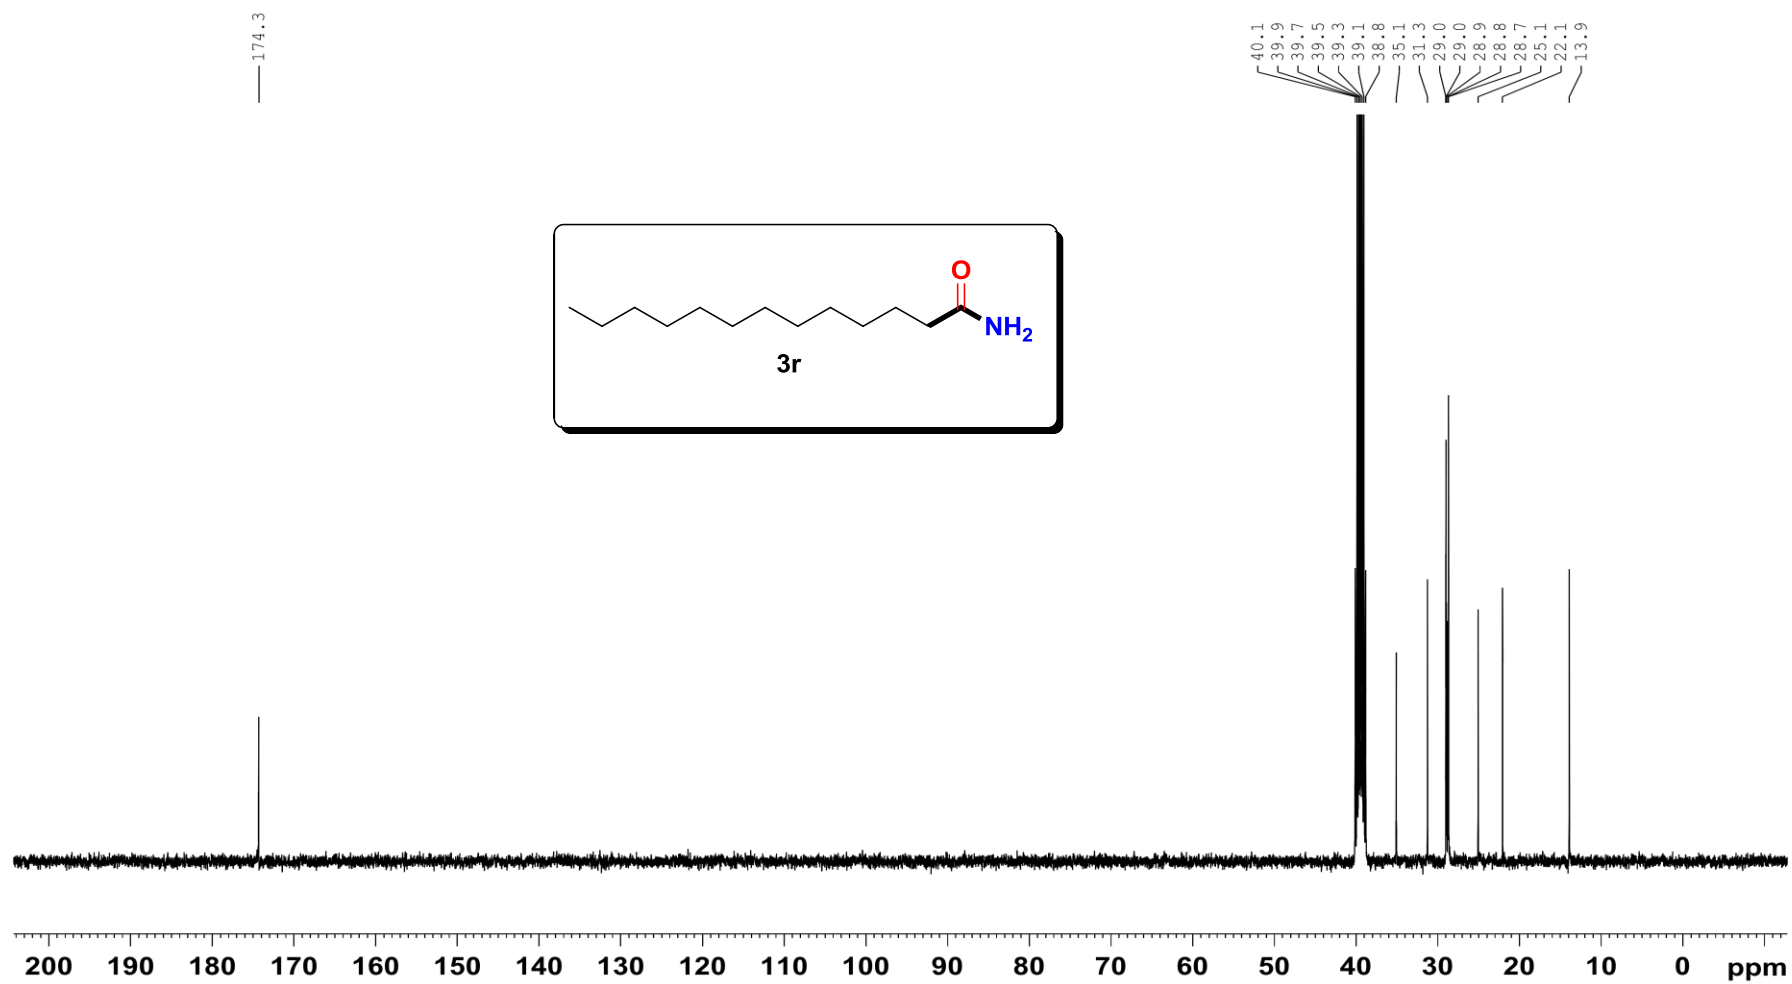



ZJP-X16X19-1-HNMR-d6-DMSO

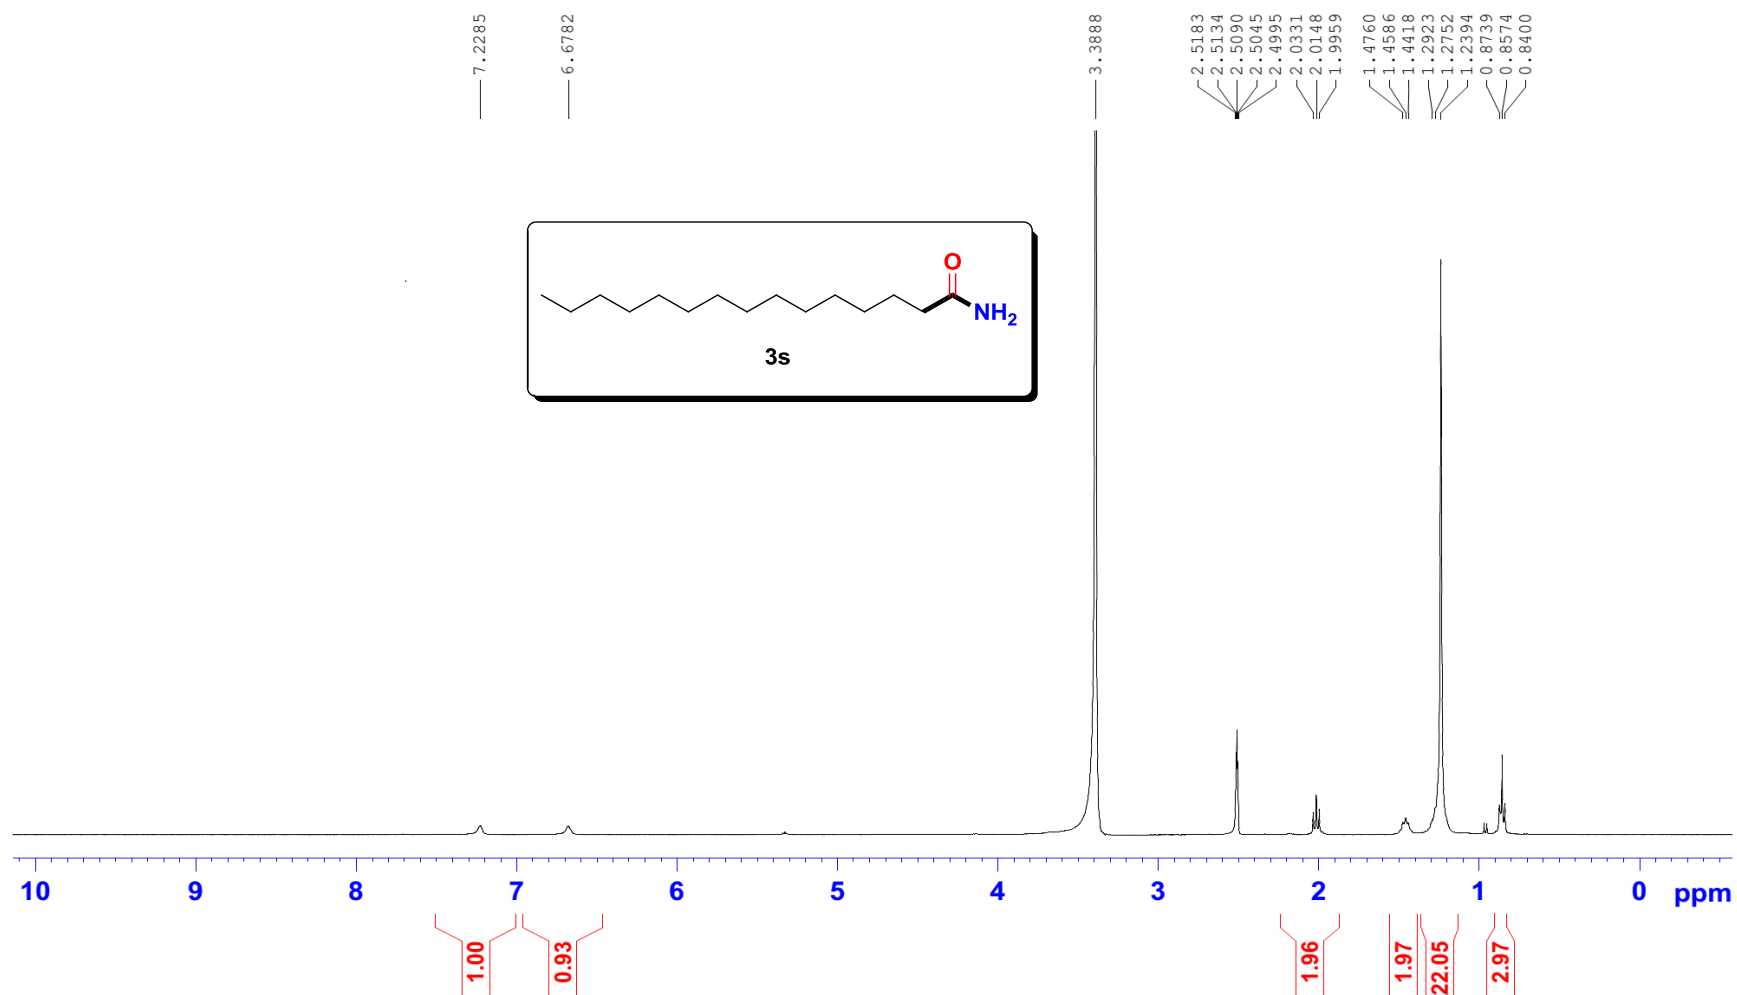

ZJP-X16X26-1-CNMR-d6-DMSO

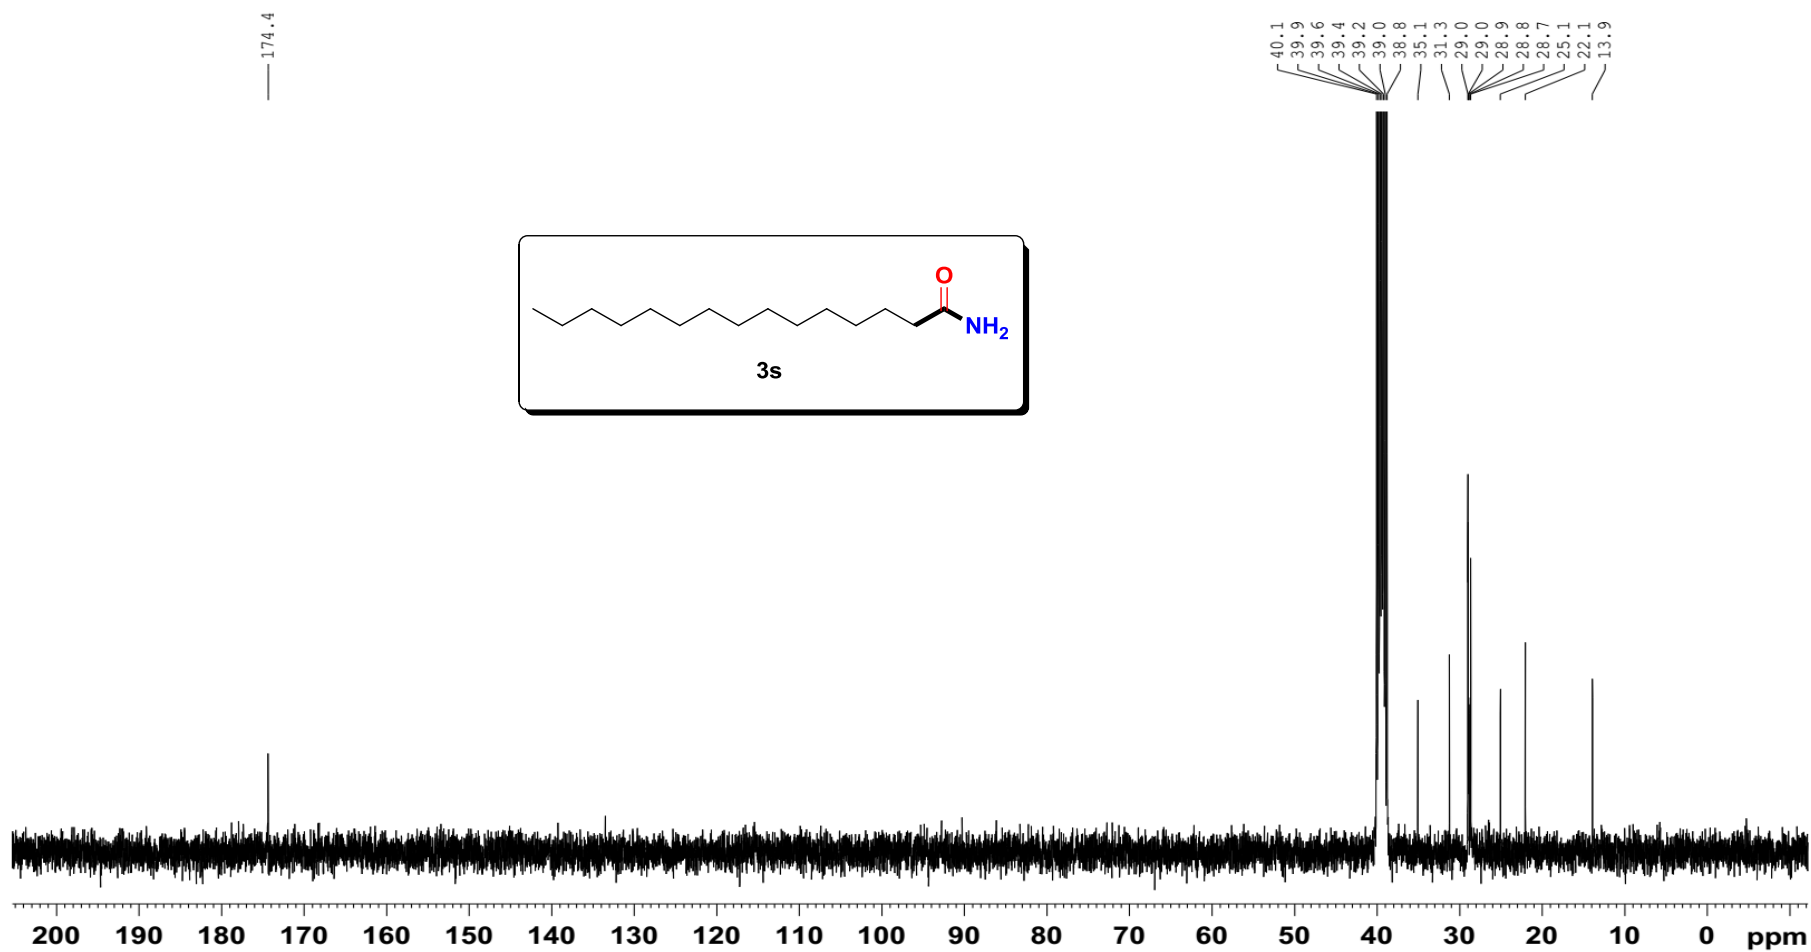

GB-X170301-1-4-HNMR in Acetone- $d_6$

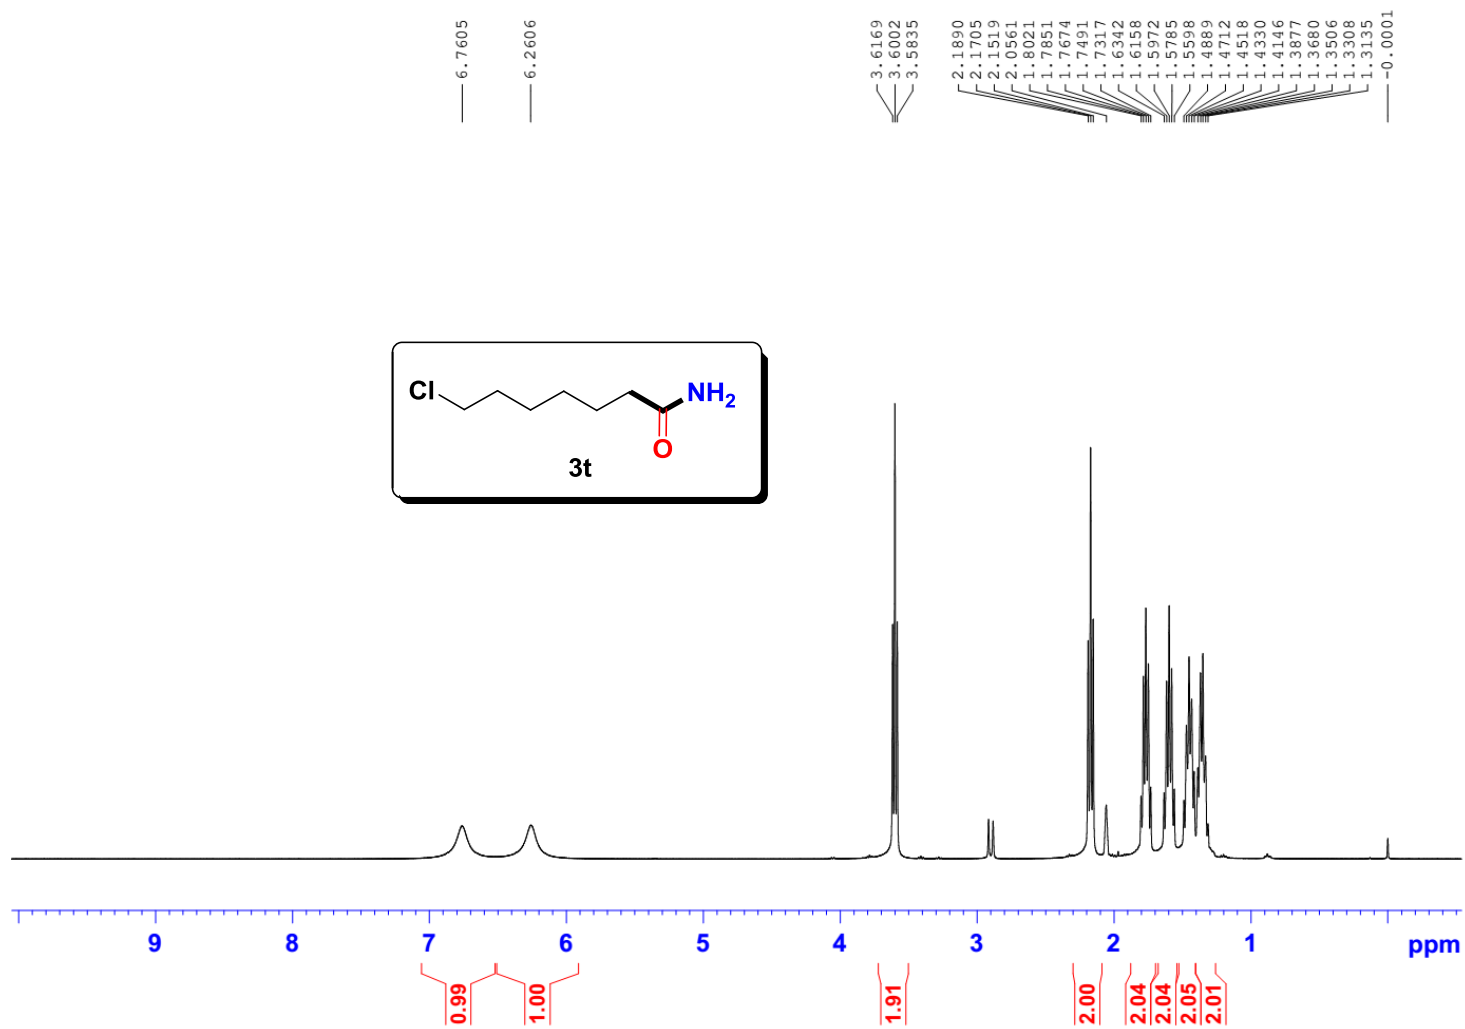

GB-X170301-1-4-CNMR in Acetone- $d_6$

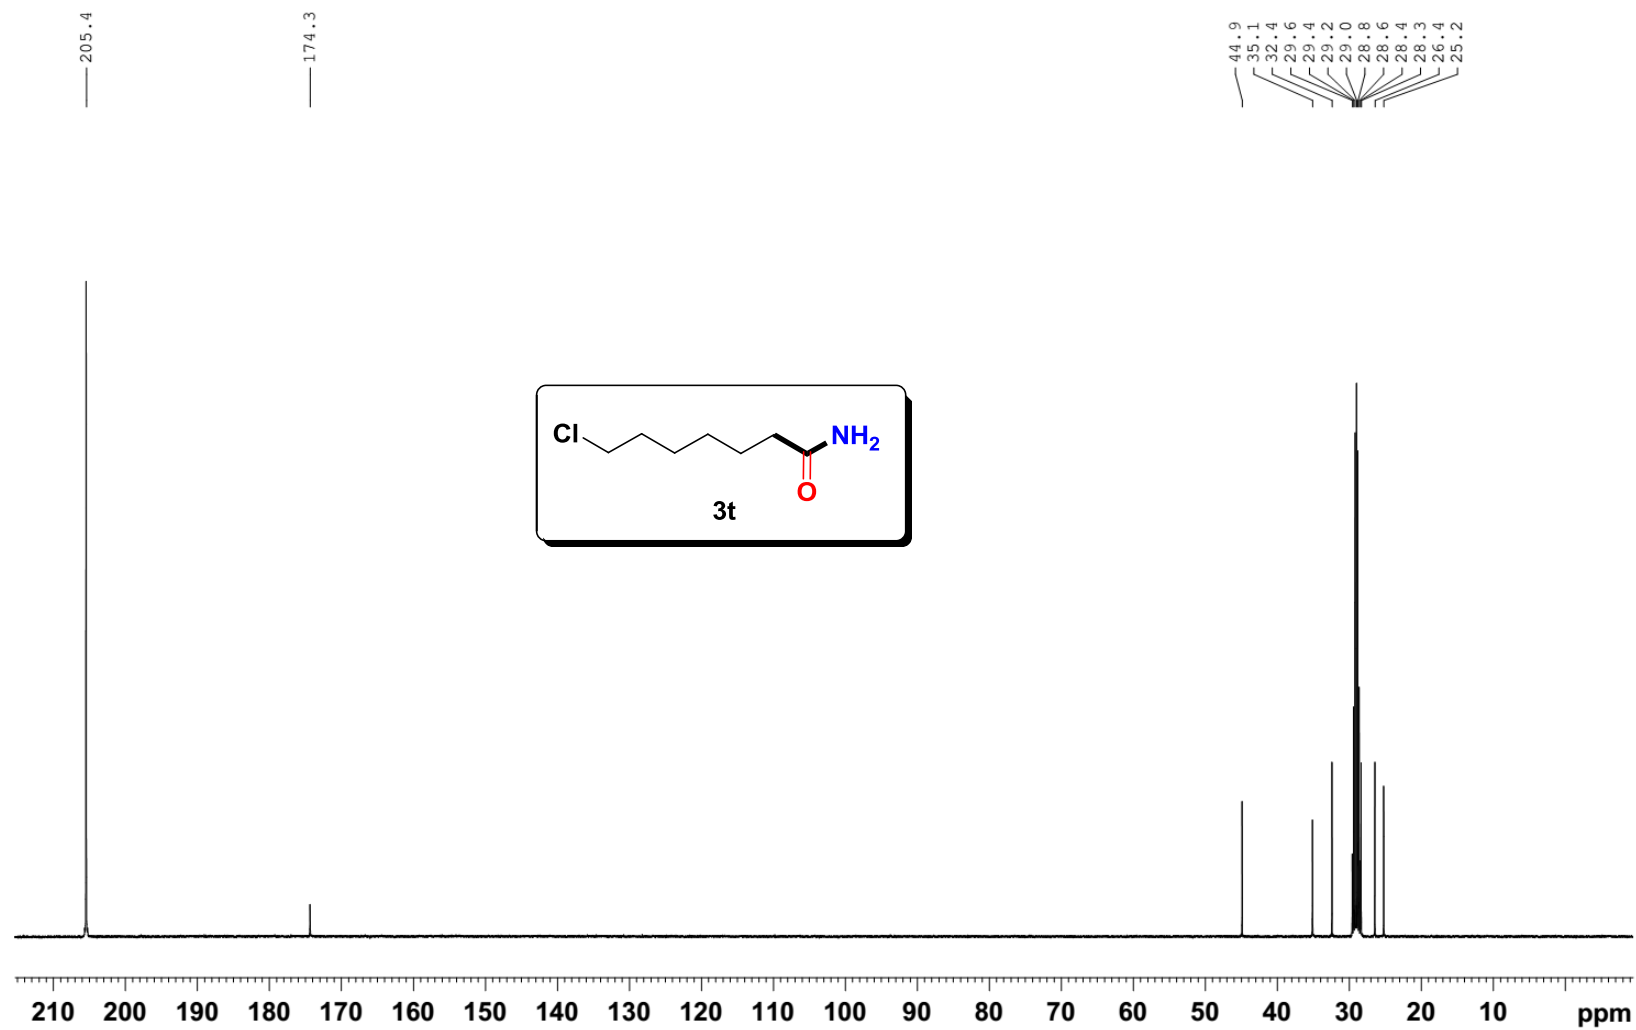

GB-X170301-1-3-HNMR in Acetone- $d_6$

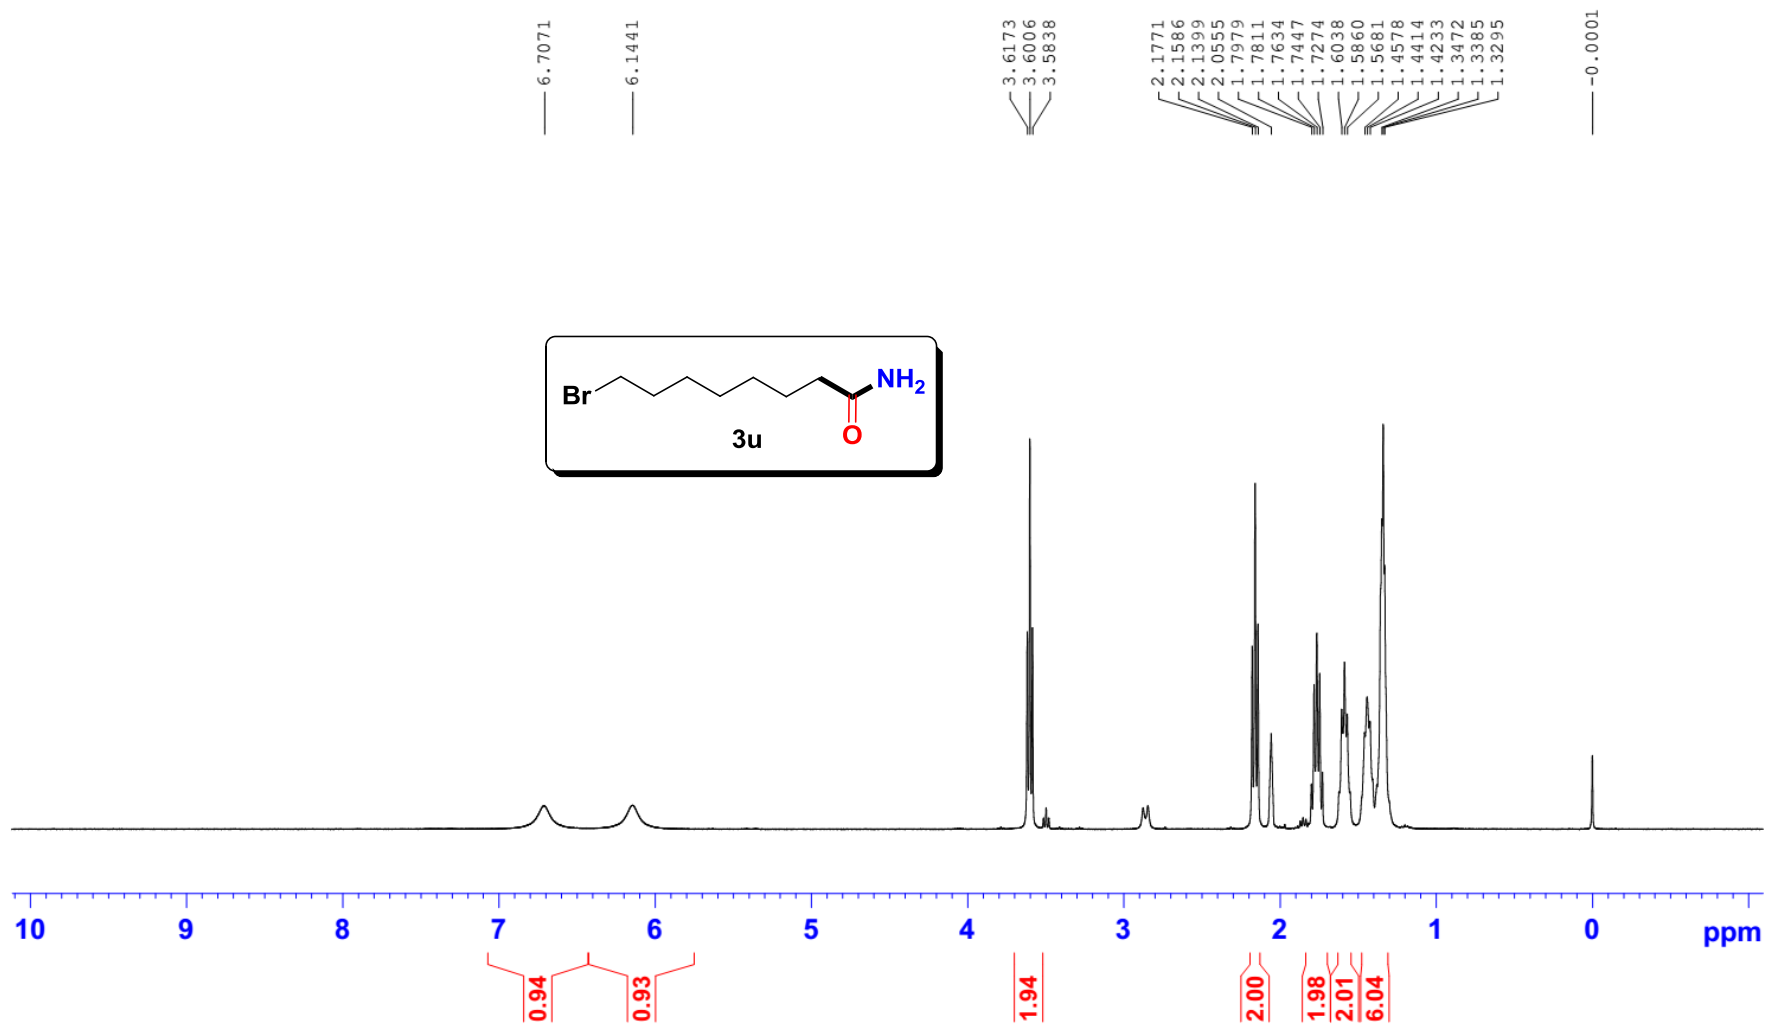

GB-X170301-1-3-CNMR in Acetone- $d_6$

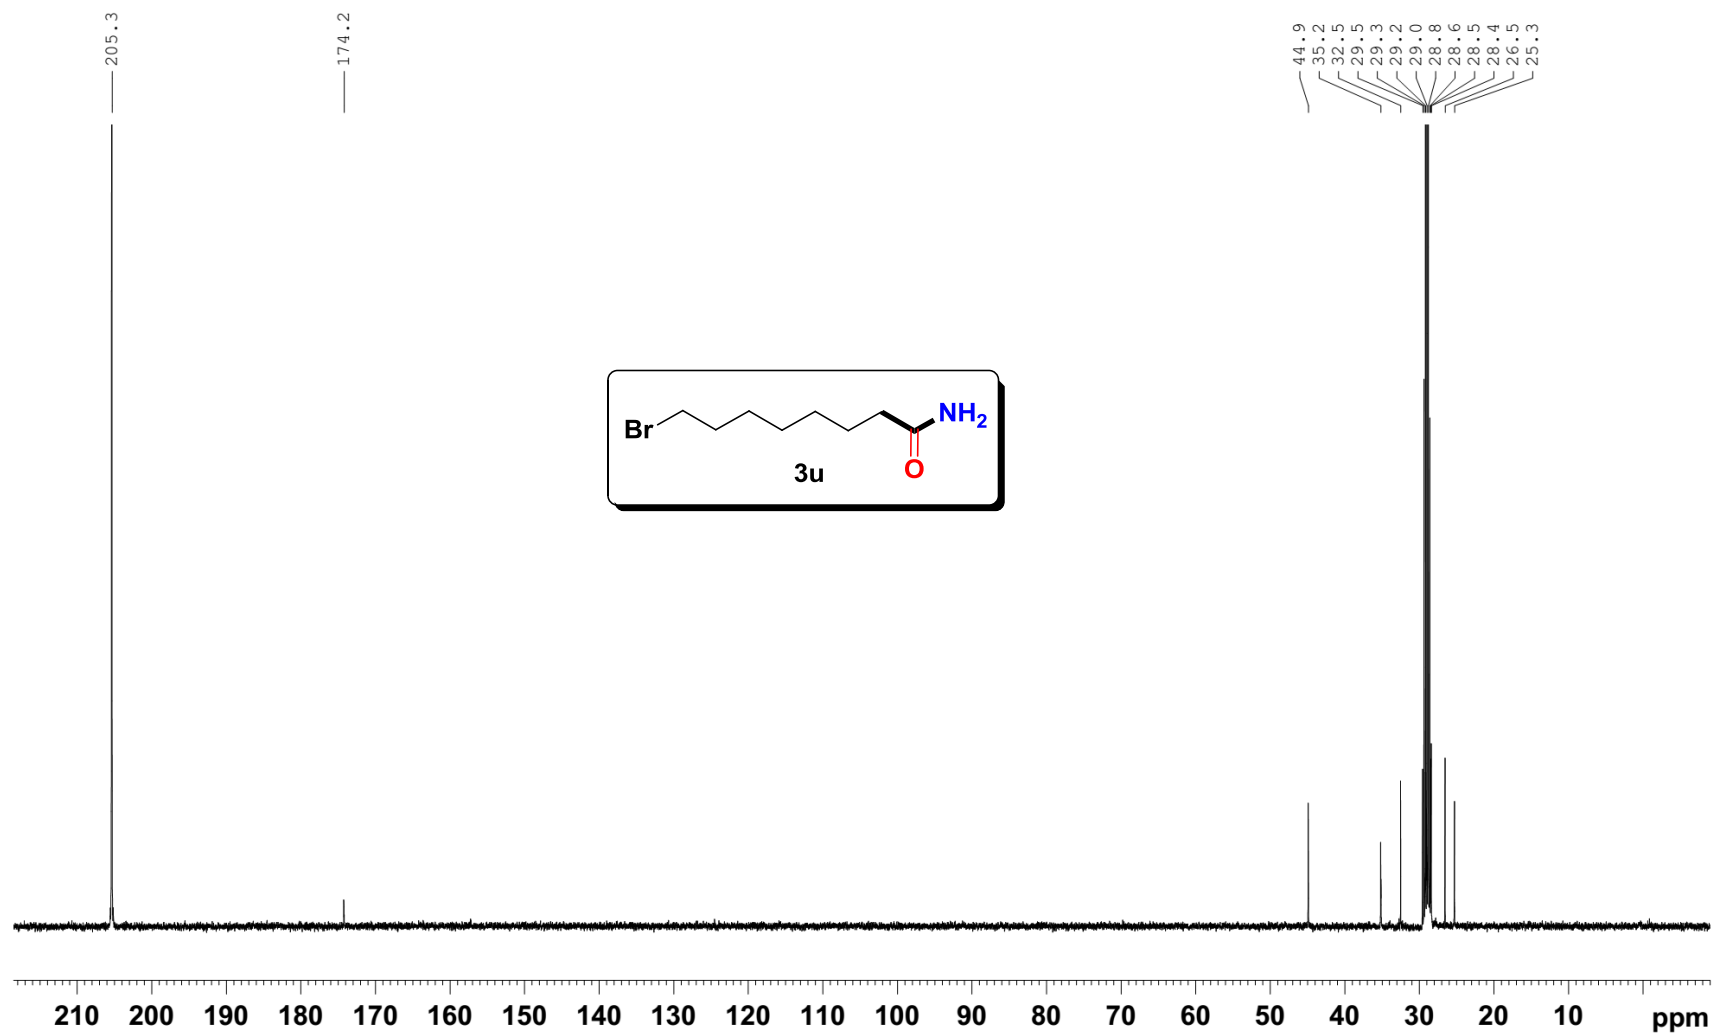

GB-X170316-1-2-HNMR in DMSO-*d*<sub>6</sub>

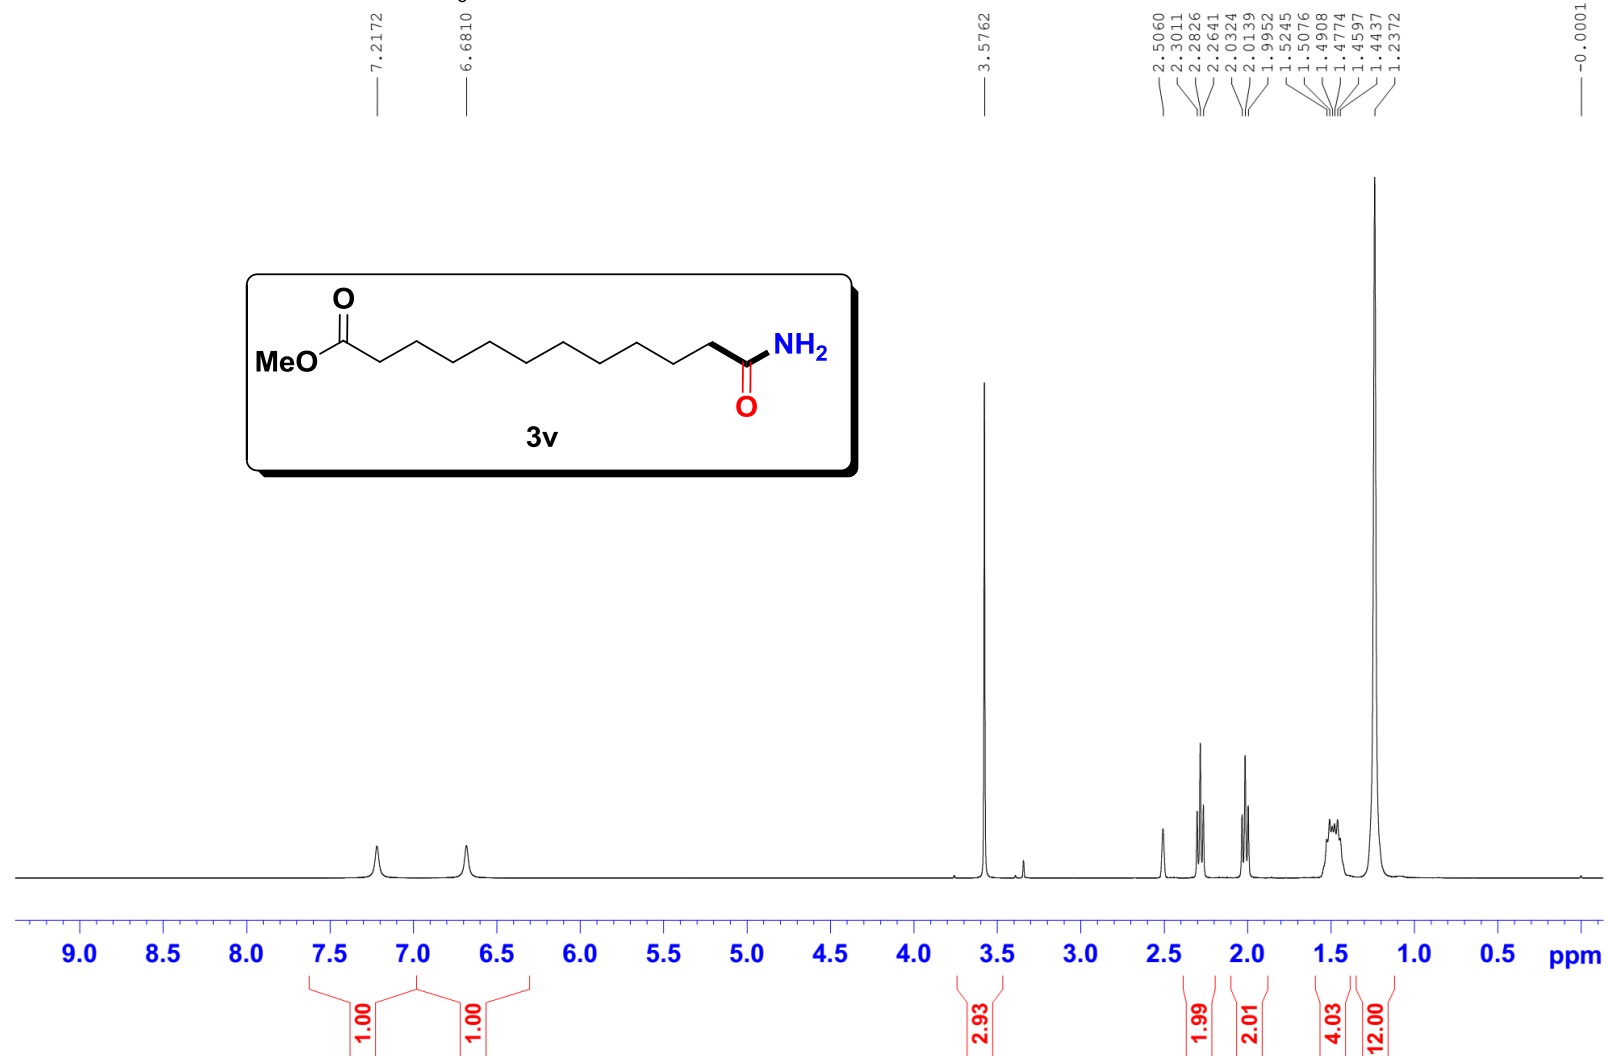

GB-X170316-1-2-CNMR in DMSO-*d*<sub>6</sub>

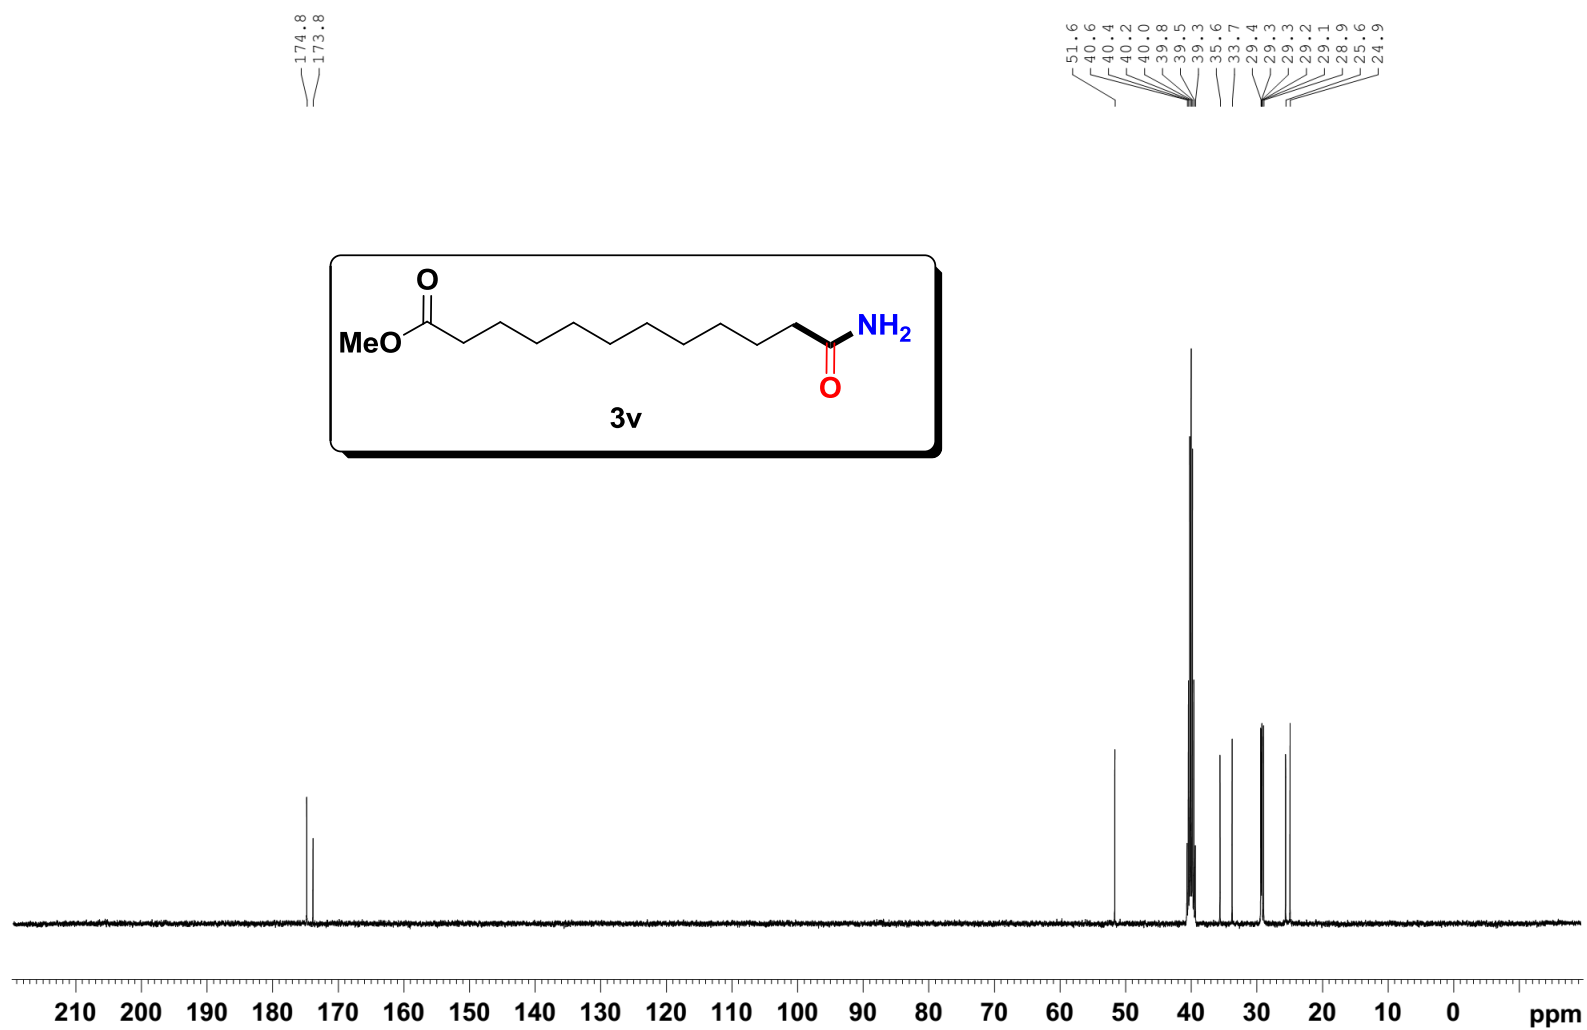



GB-X170228-1-5-HNMR in DMSO-*d*<sub>6</sub>

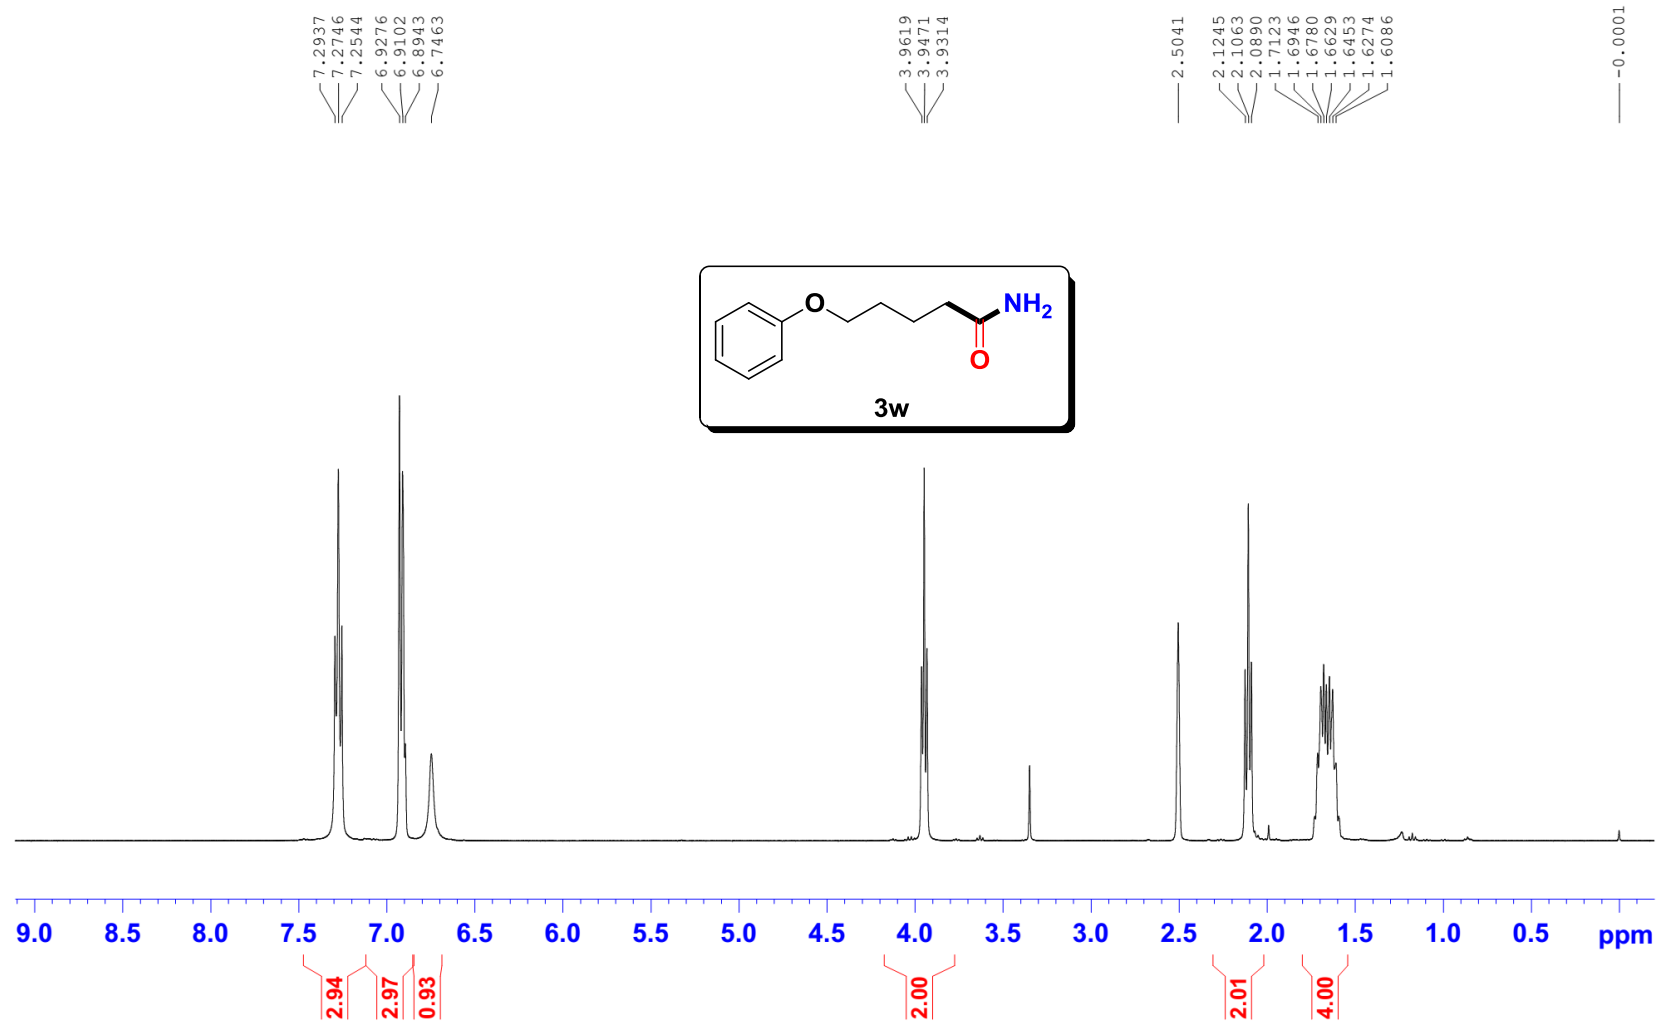

GB-X170228-1-5-CNMR in DMSO- $d_6$

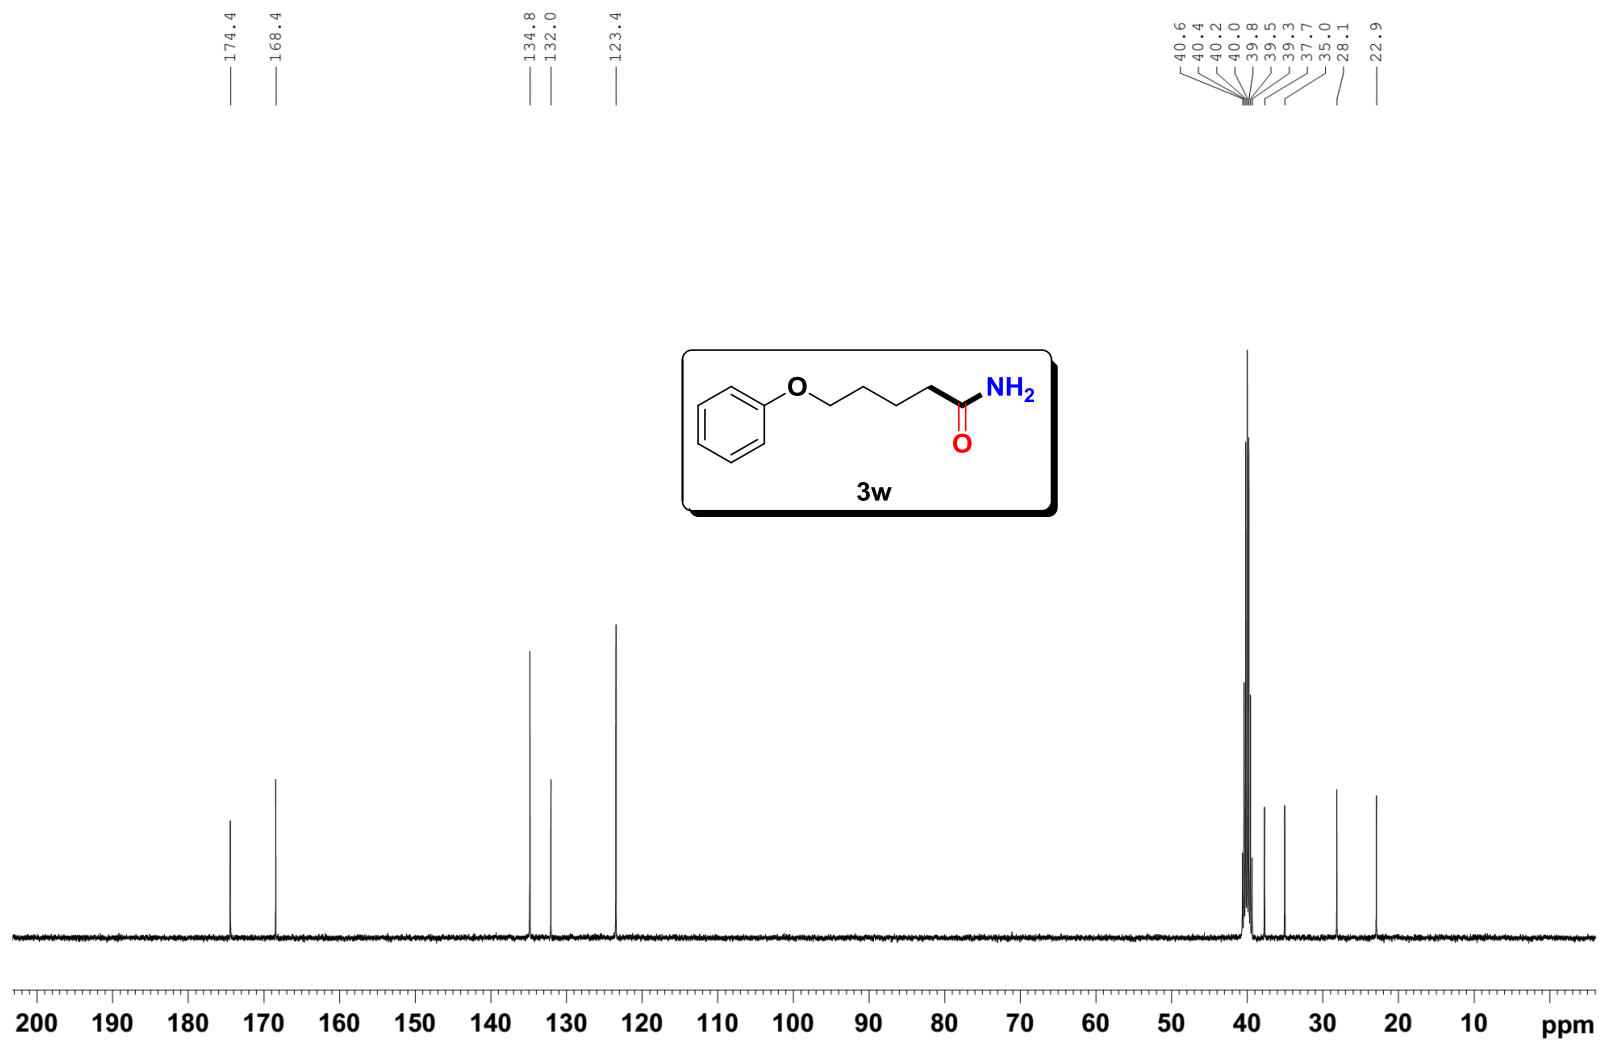

GB-X170228-1-3-HNMR in DMSO- $d_6$

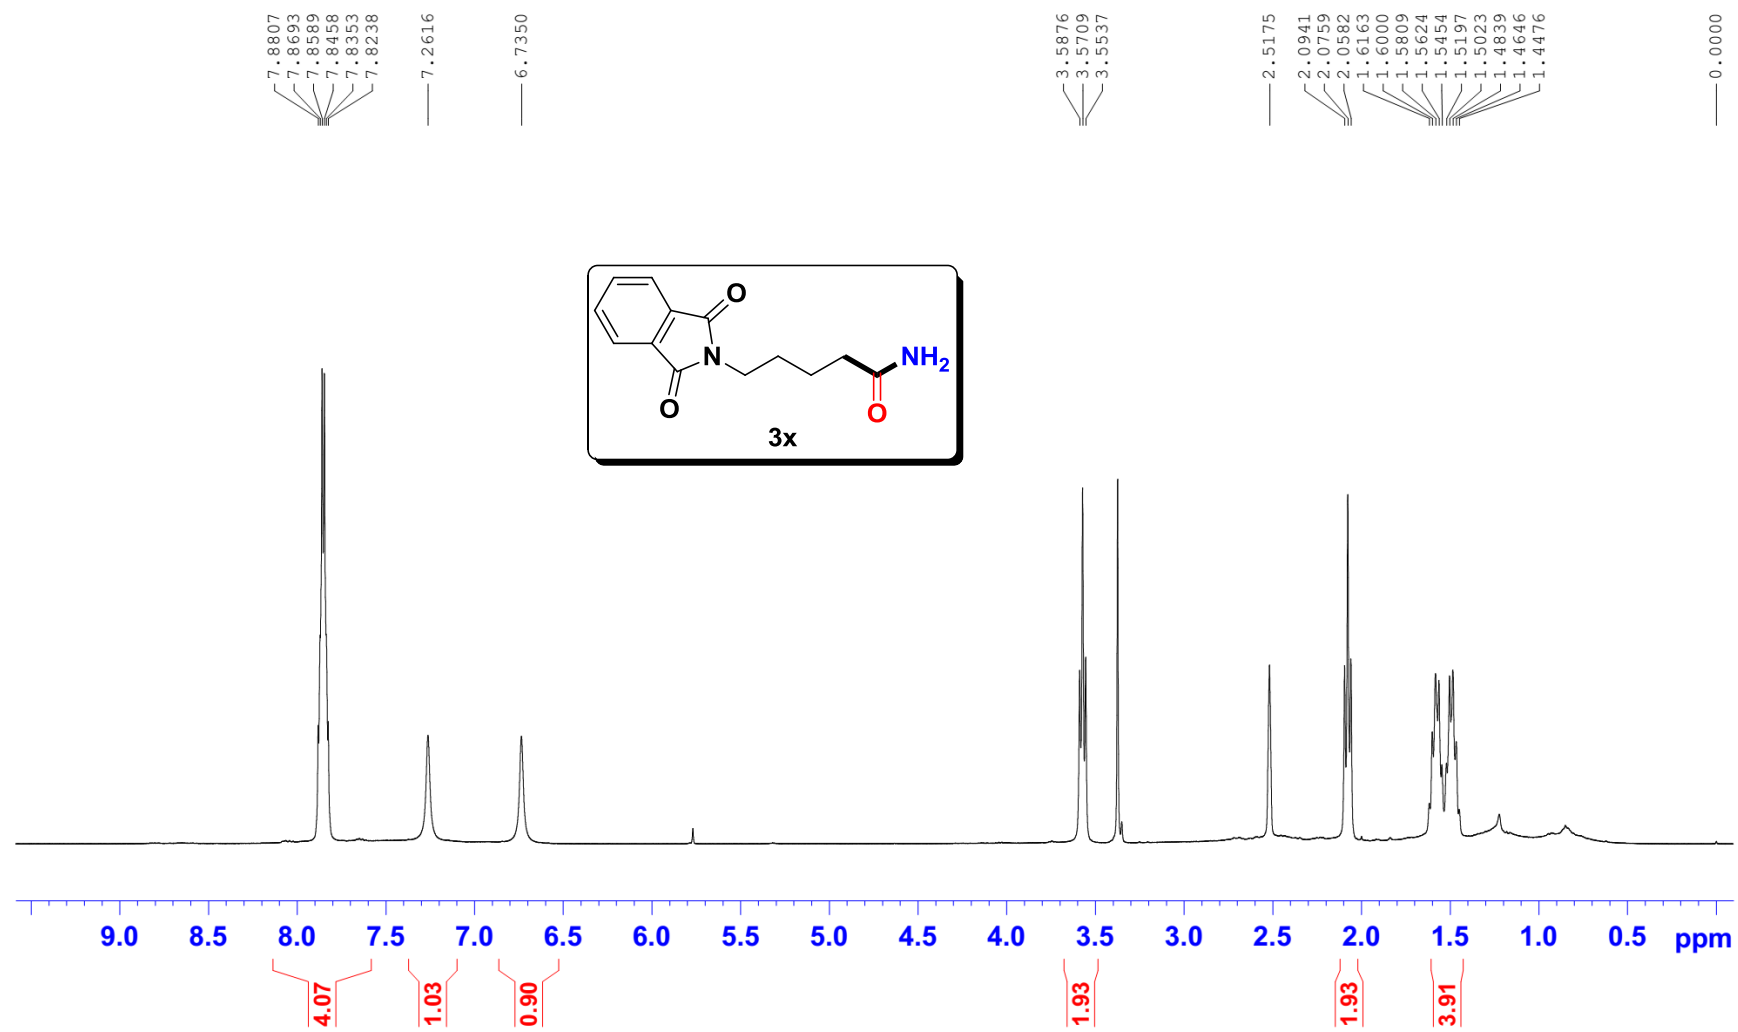

GB-X170228-1-3-CNMR in DMSO-*d*<sub>6</sub>

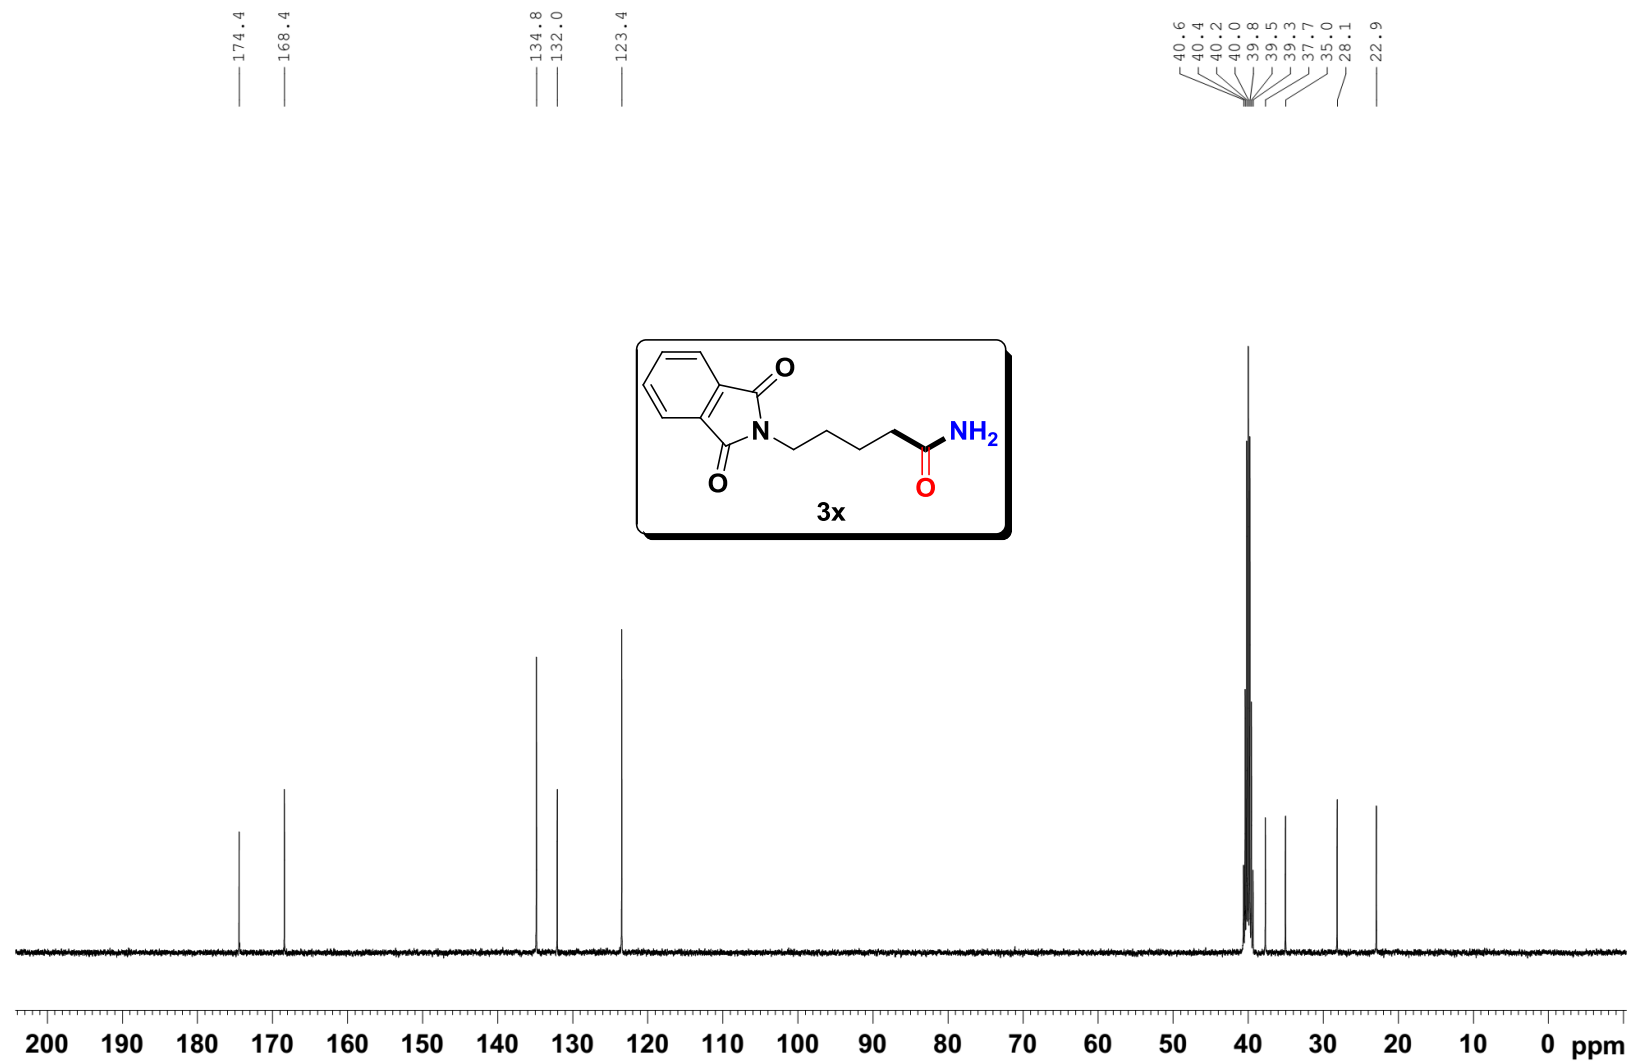

GB-X170228-1-6-HNMR in DMSO-*d*<sub>6</sub>

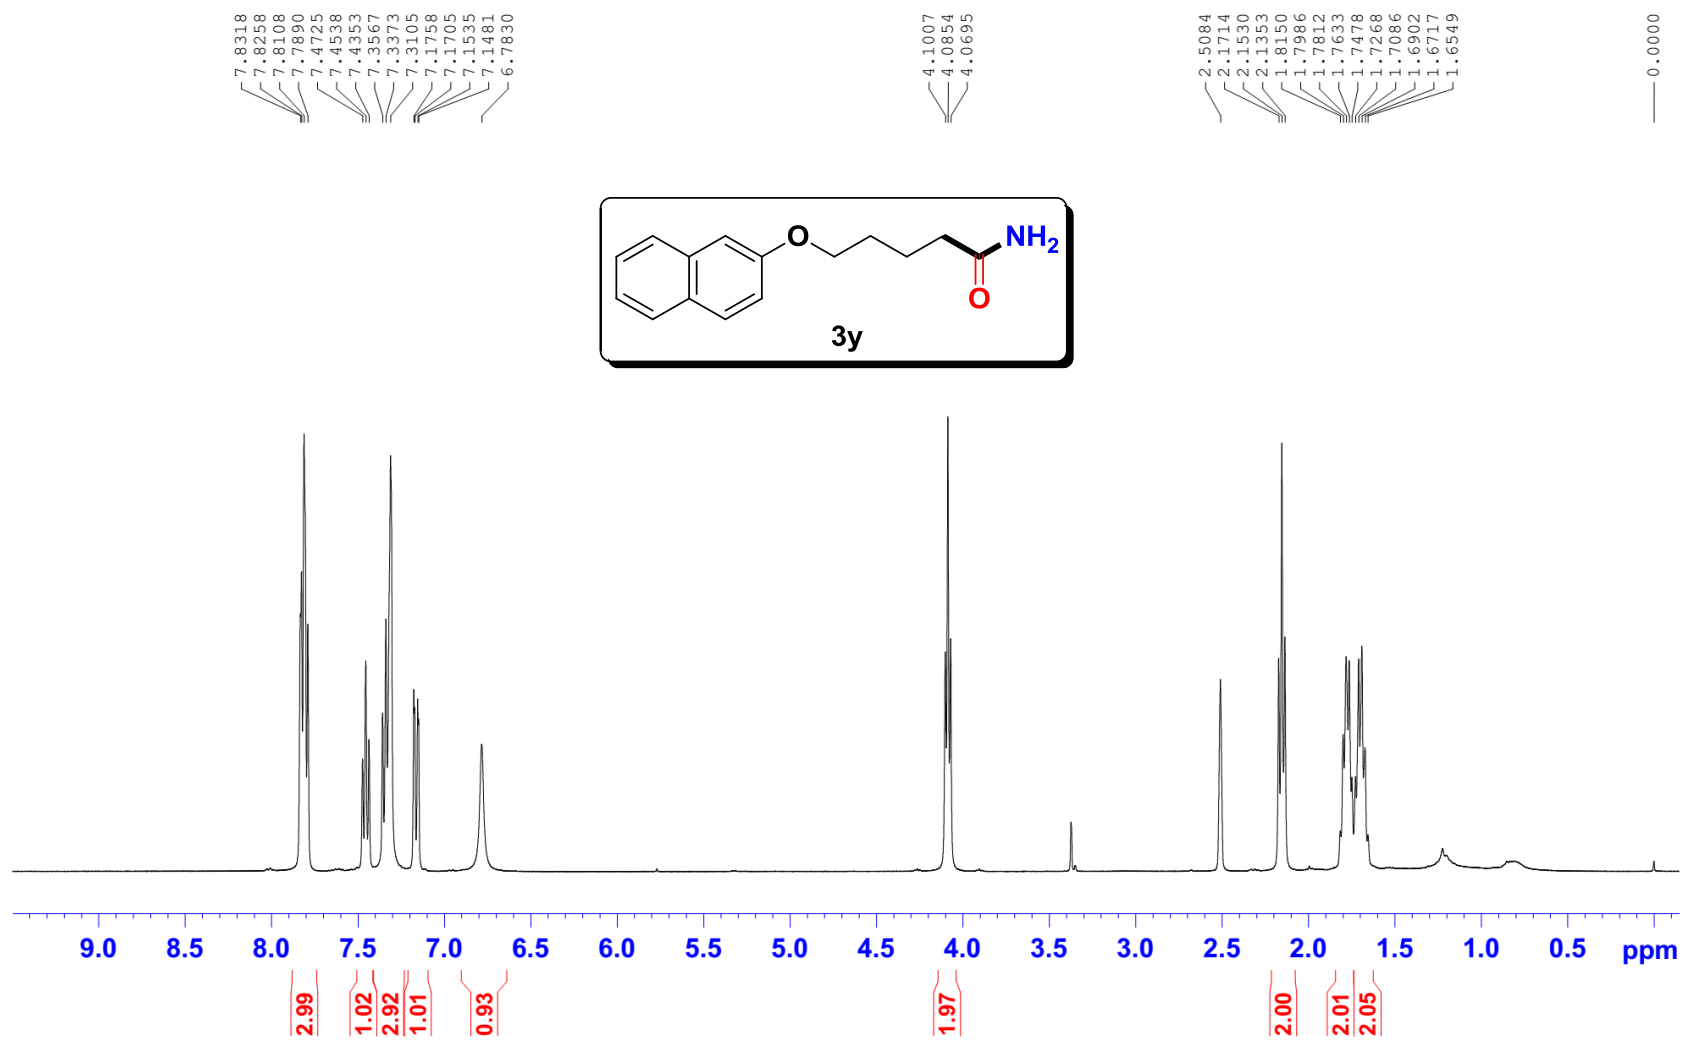

GB-X170228-1-6-CNMR in DMSO- $d_6$

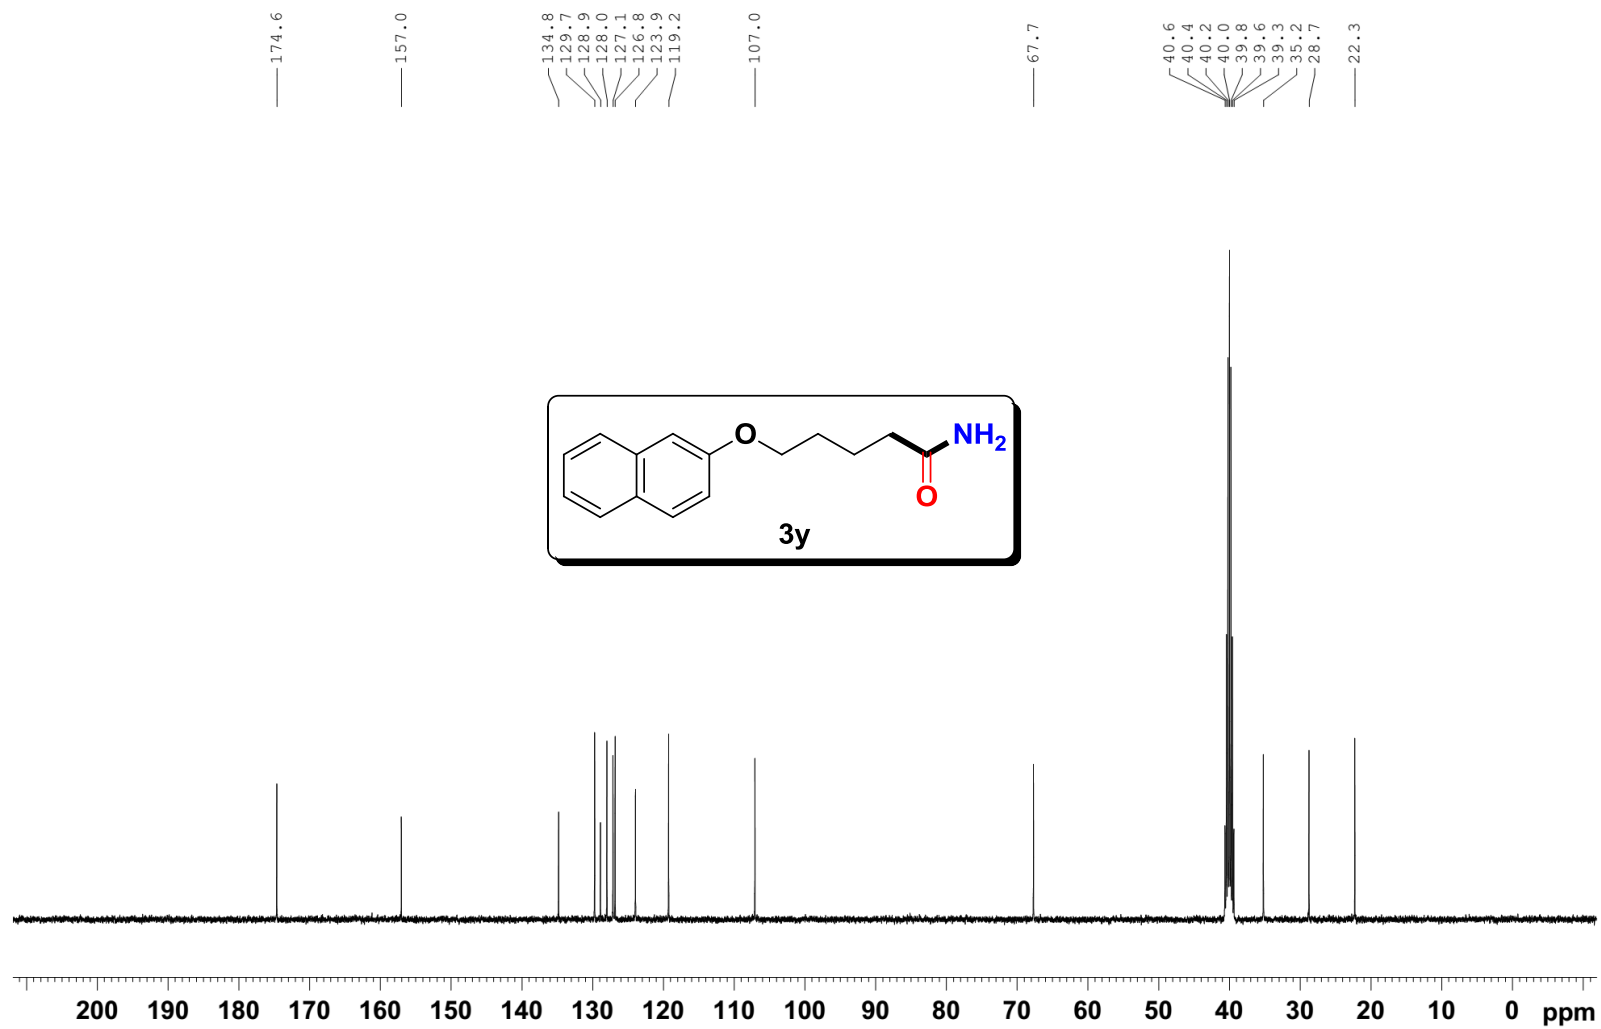

GB-X170223-1-2-HNMR

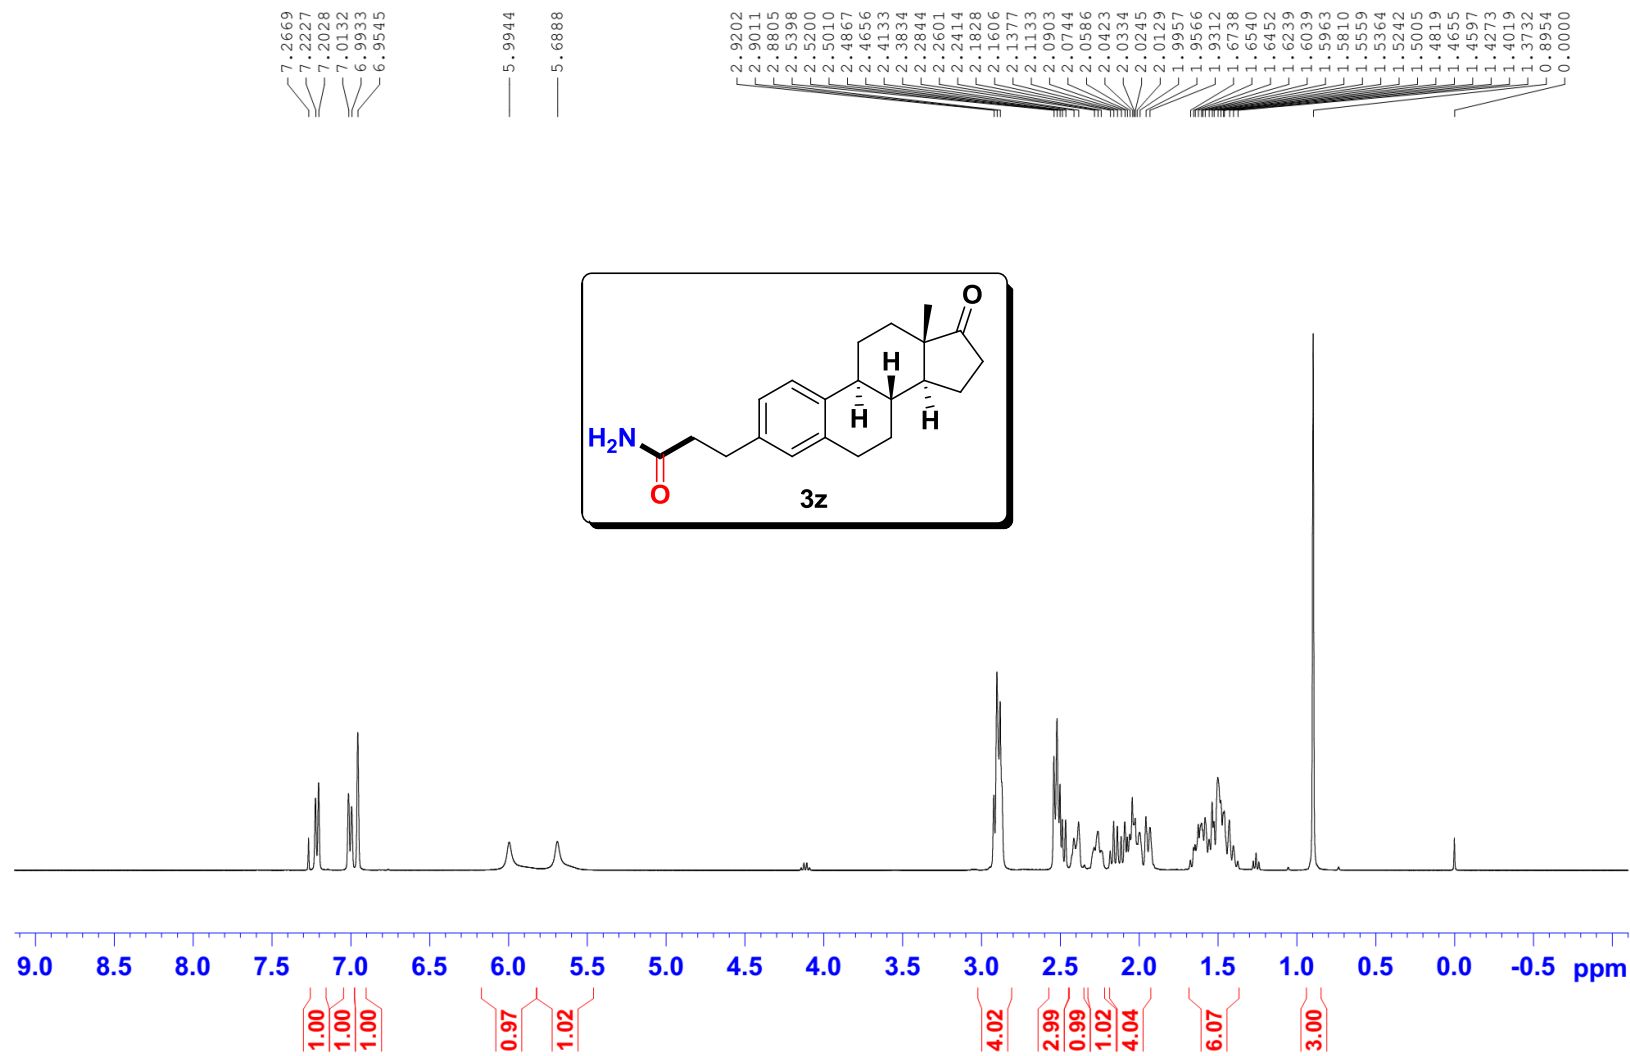

GB-X170223-1-2-CNMR

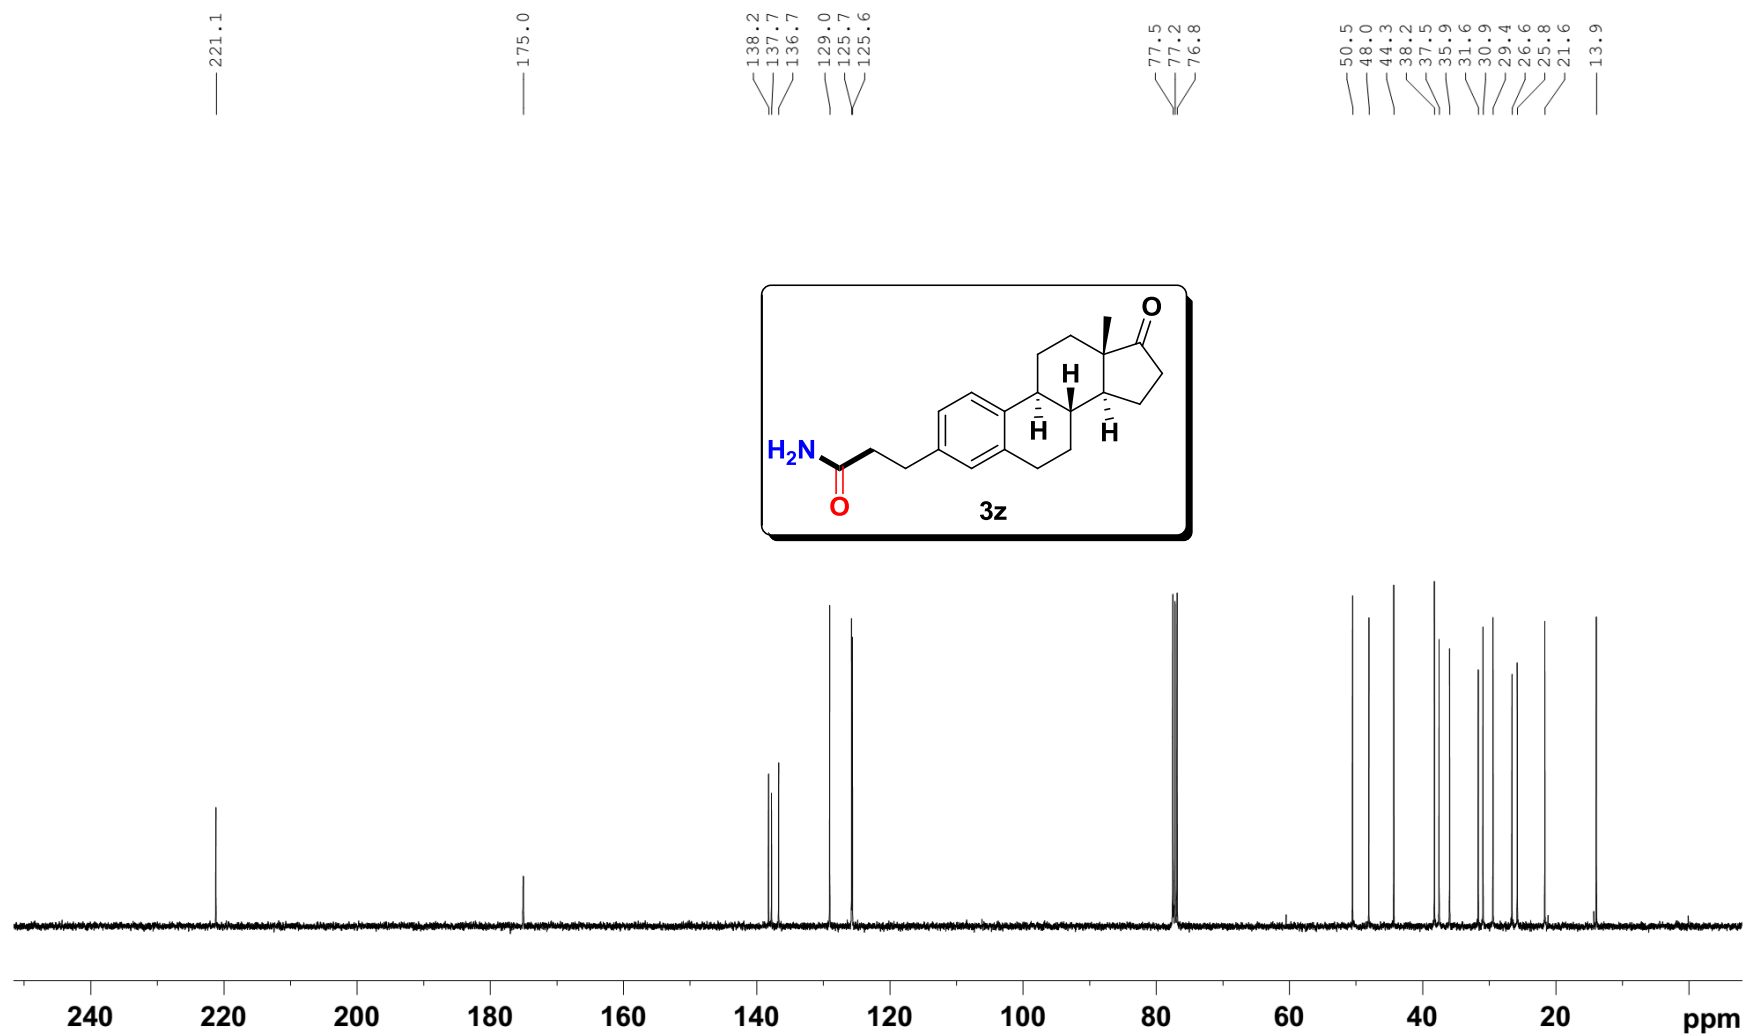



ZGY-X15X12-3-HNMR

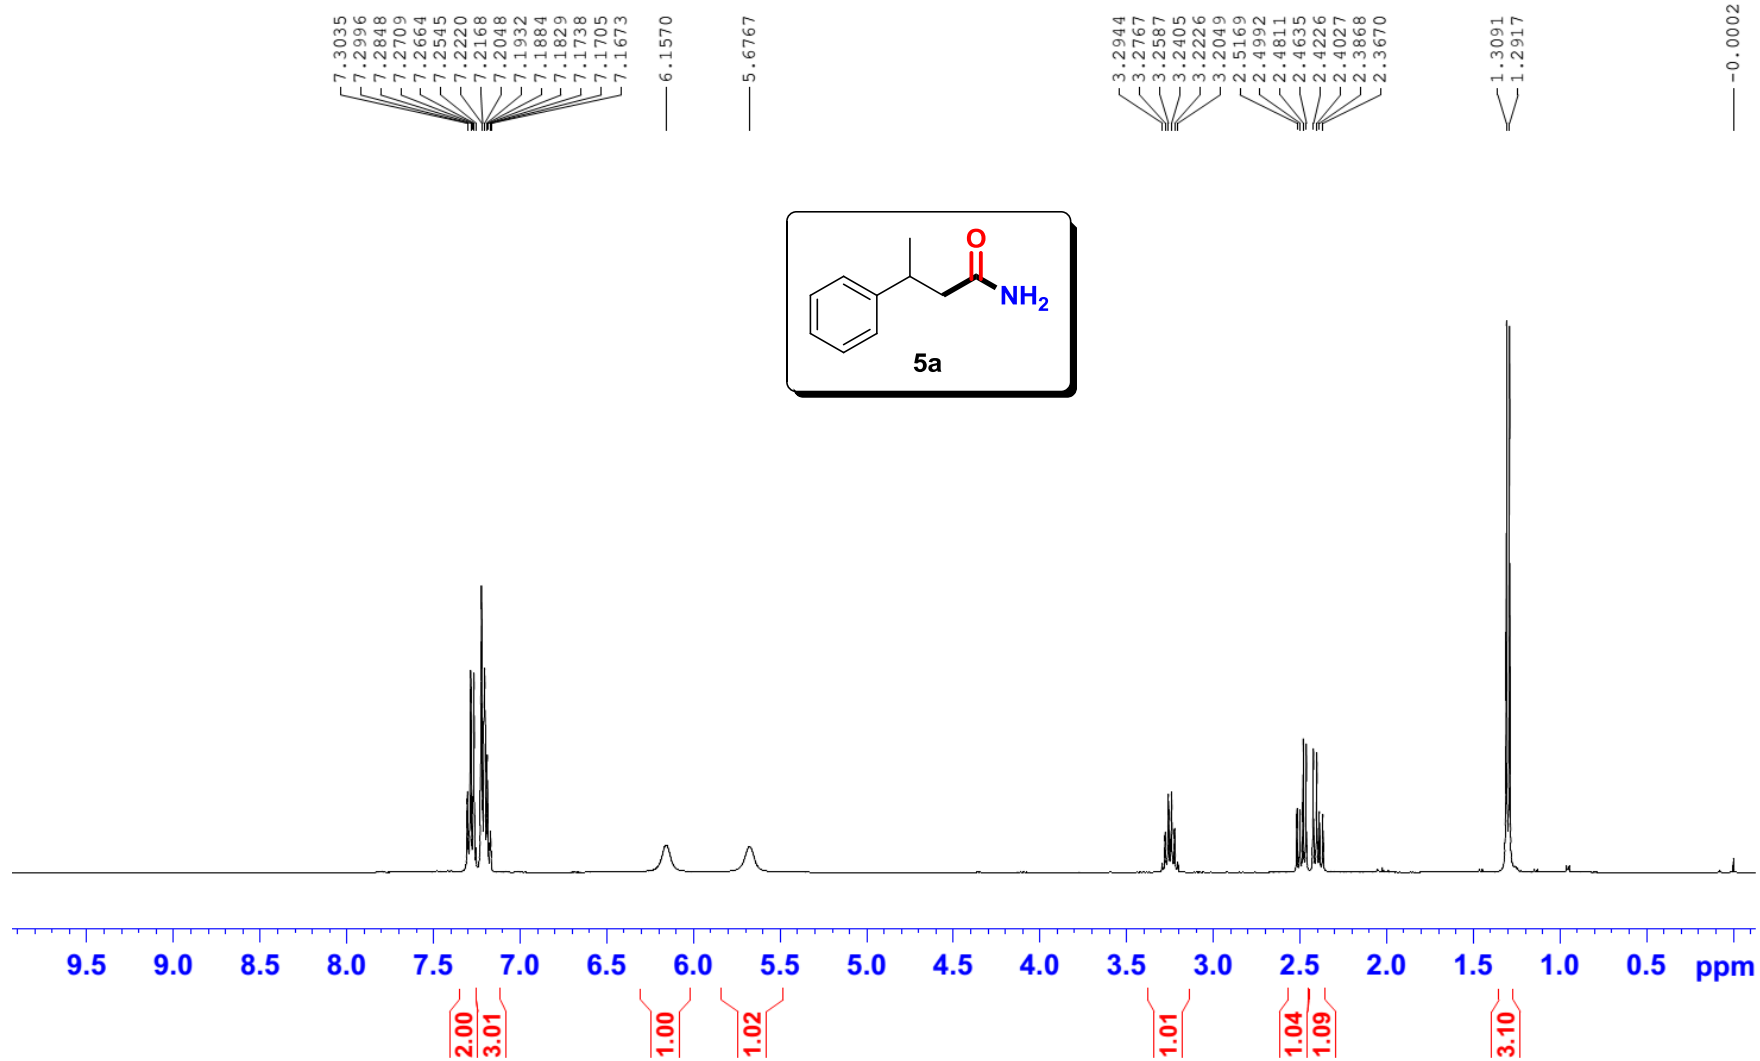

ZGY-X15X12-3-CNMR

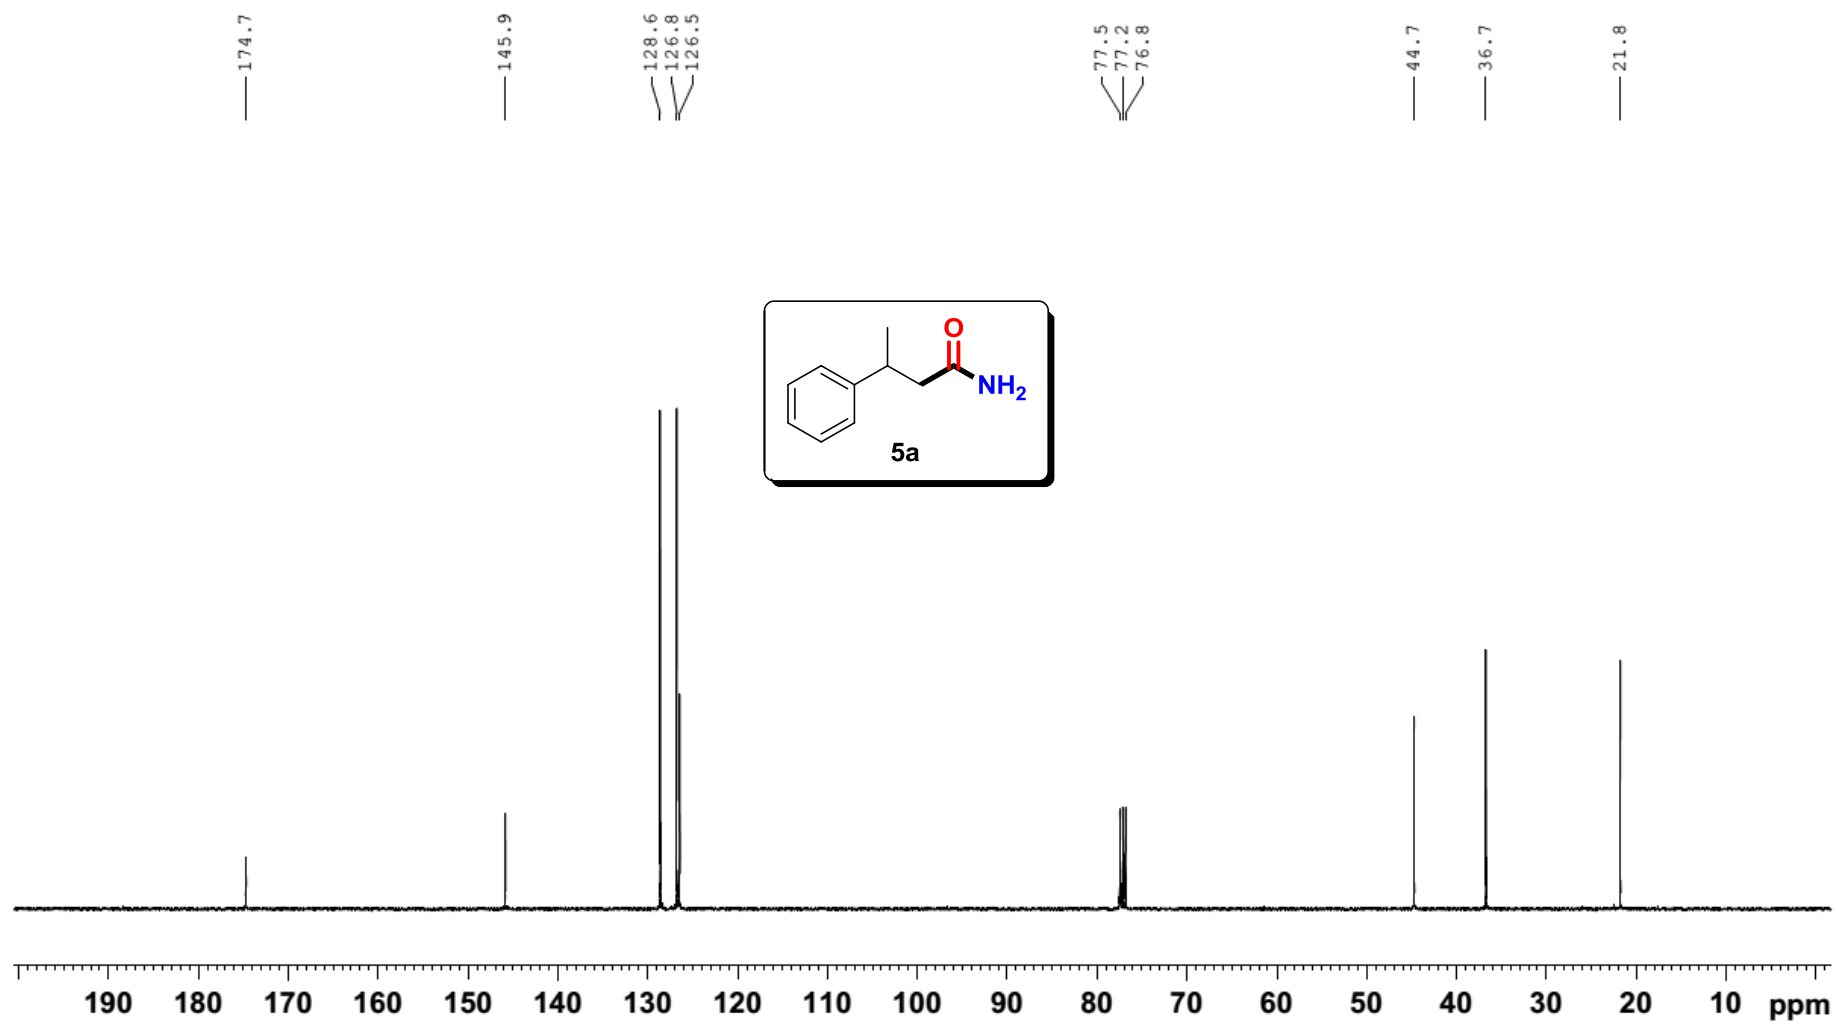

ZGY-X15X22-1-HNMR

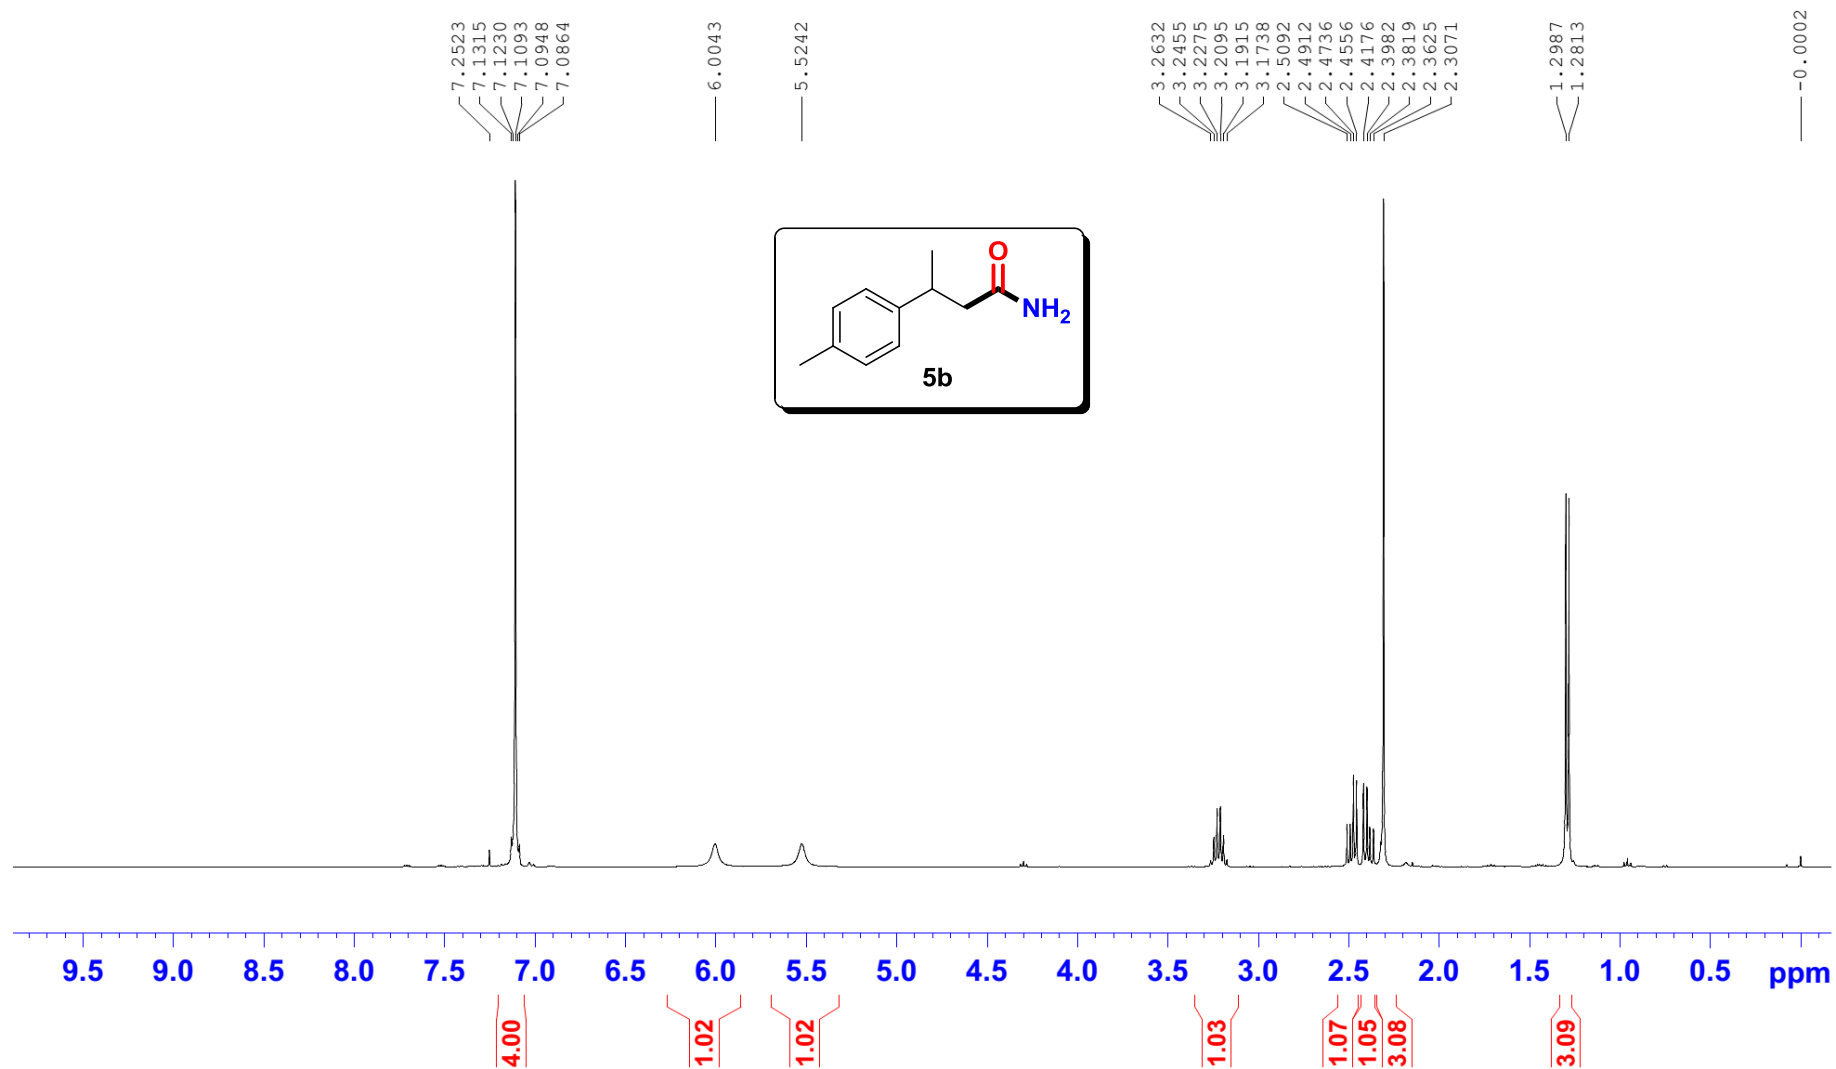

ZGY-X15X22-1-<sup>13</sup>CNMR

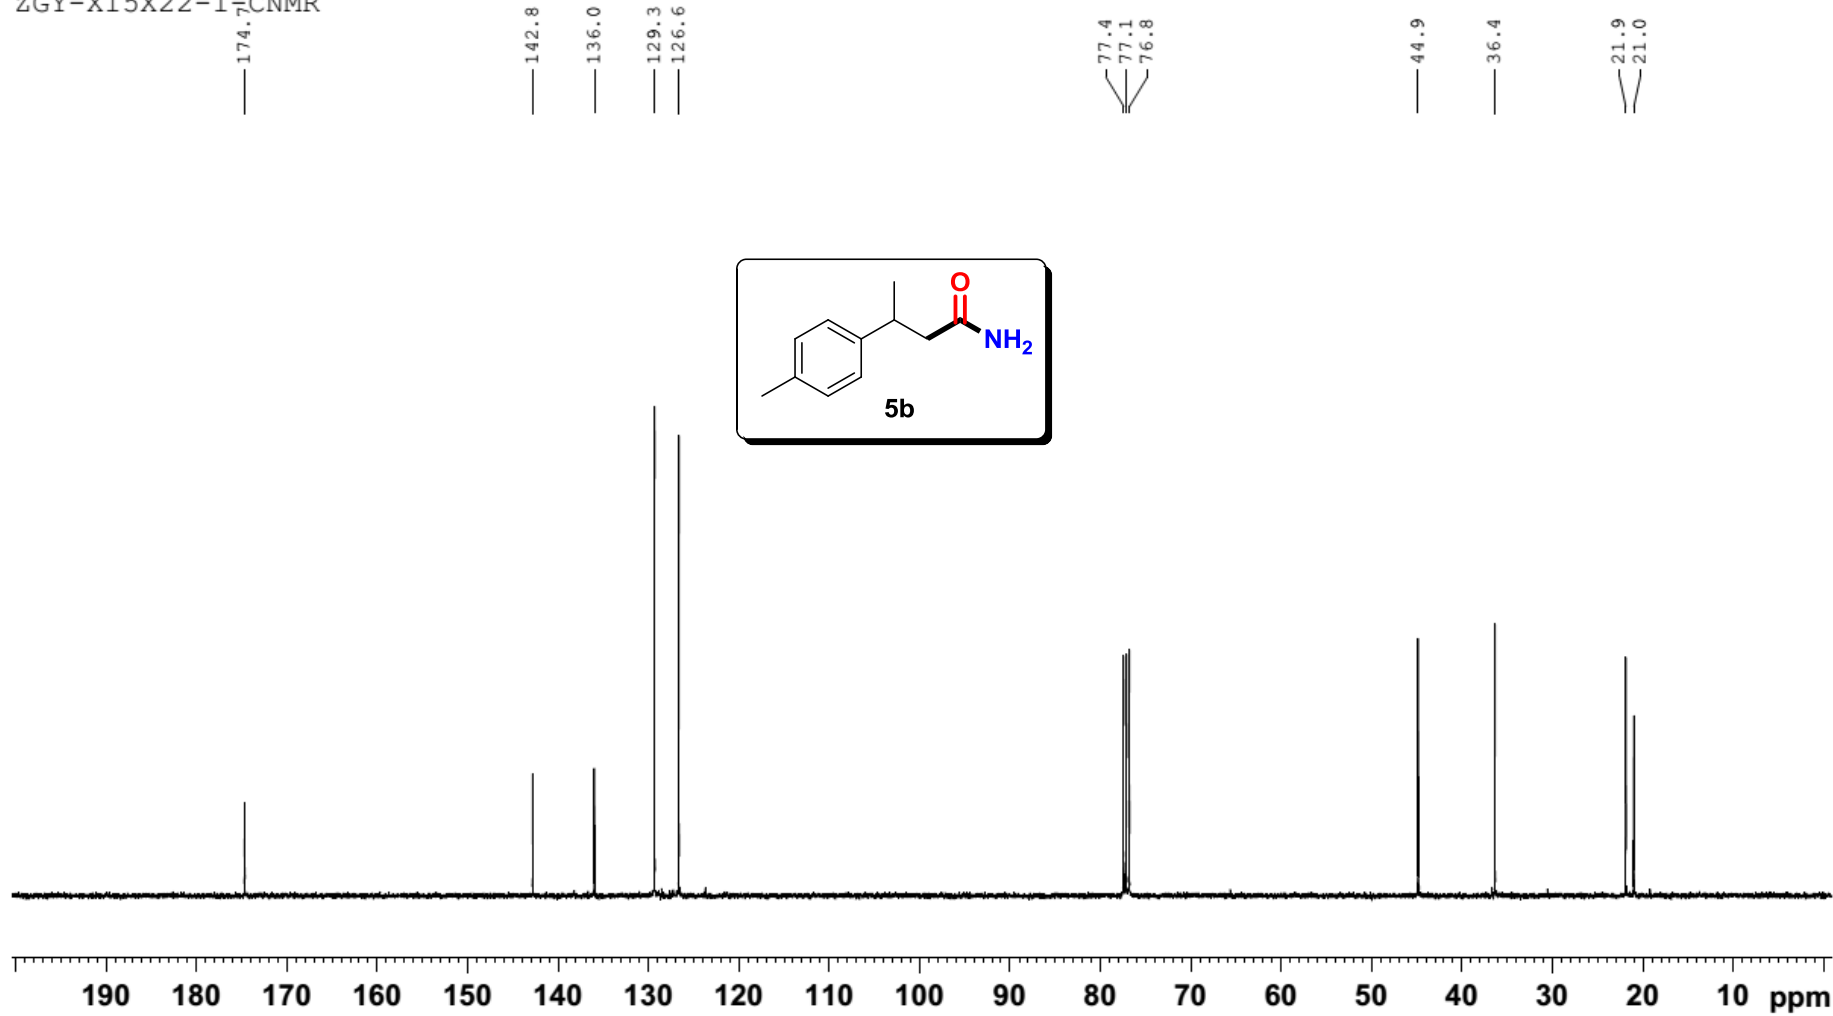

ZGY-X15X21-5-HNMR

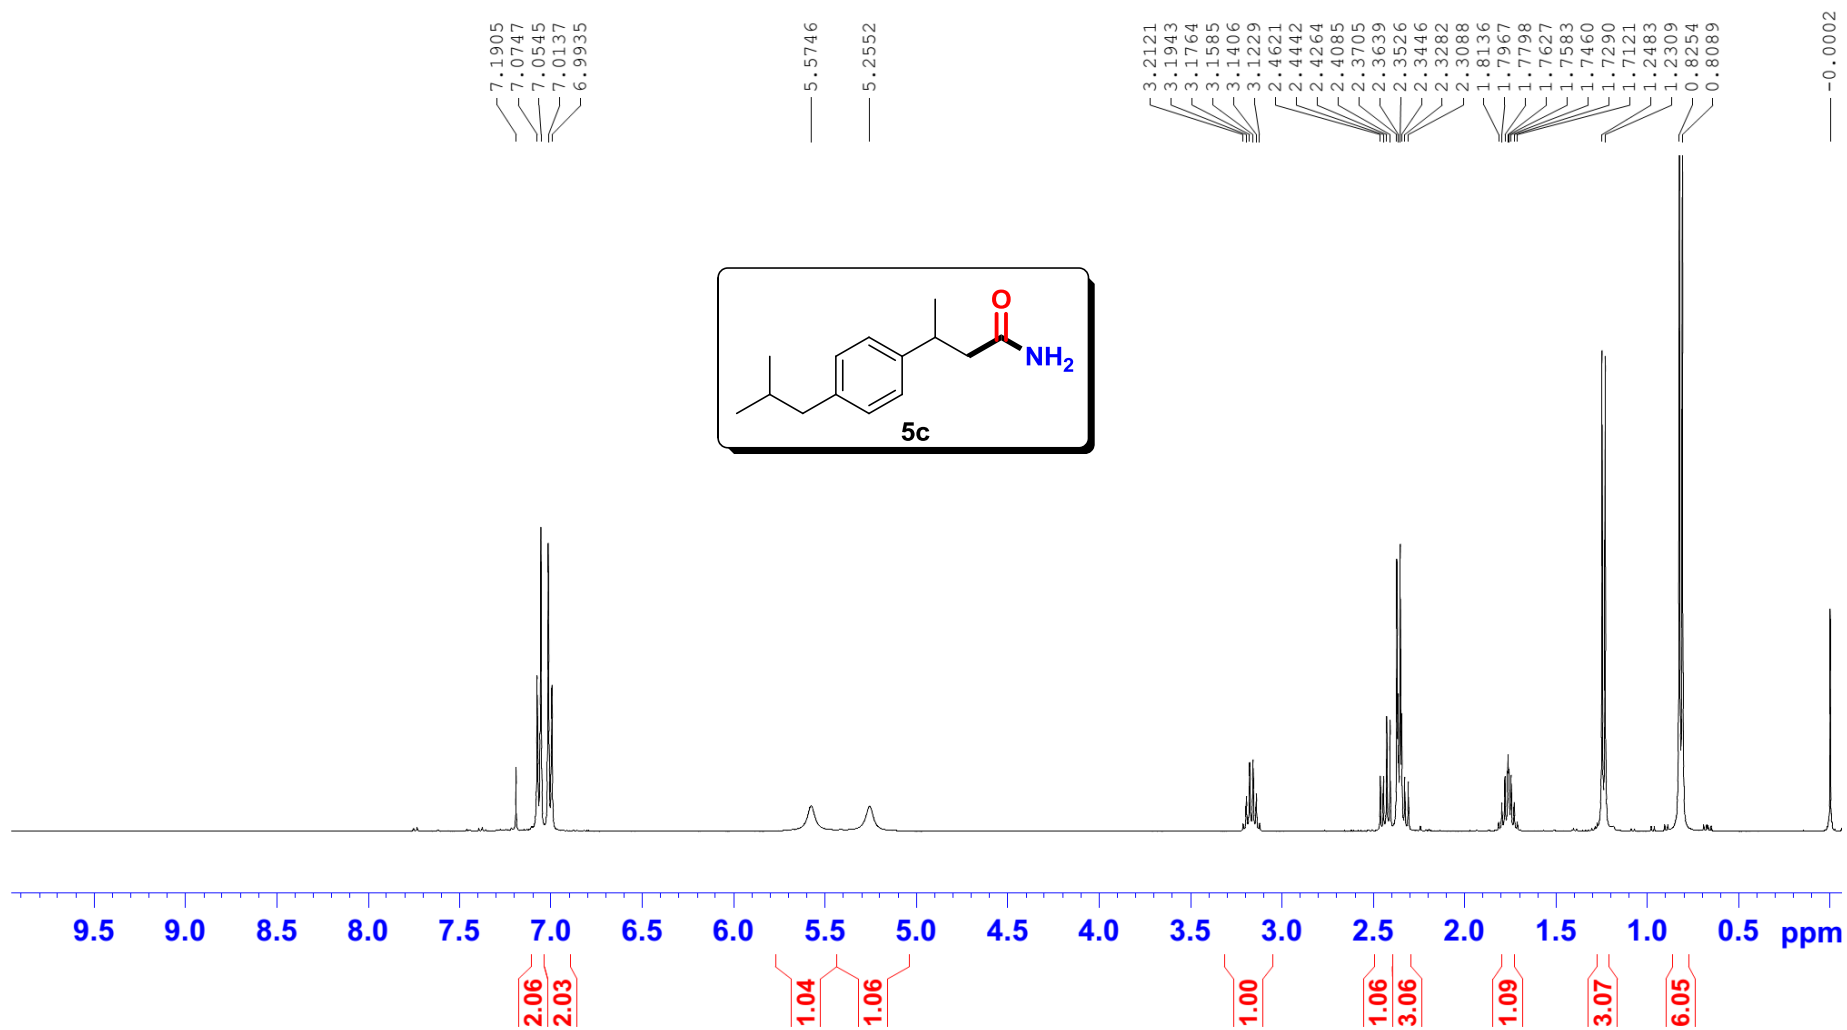

ZGY-X15X21-5-CNMR

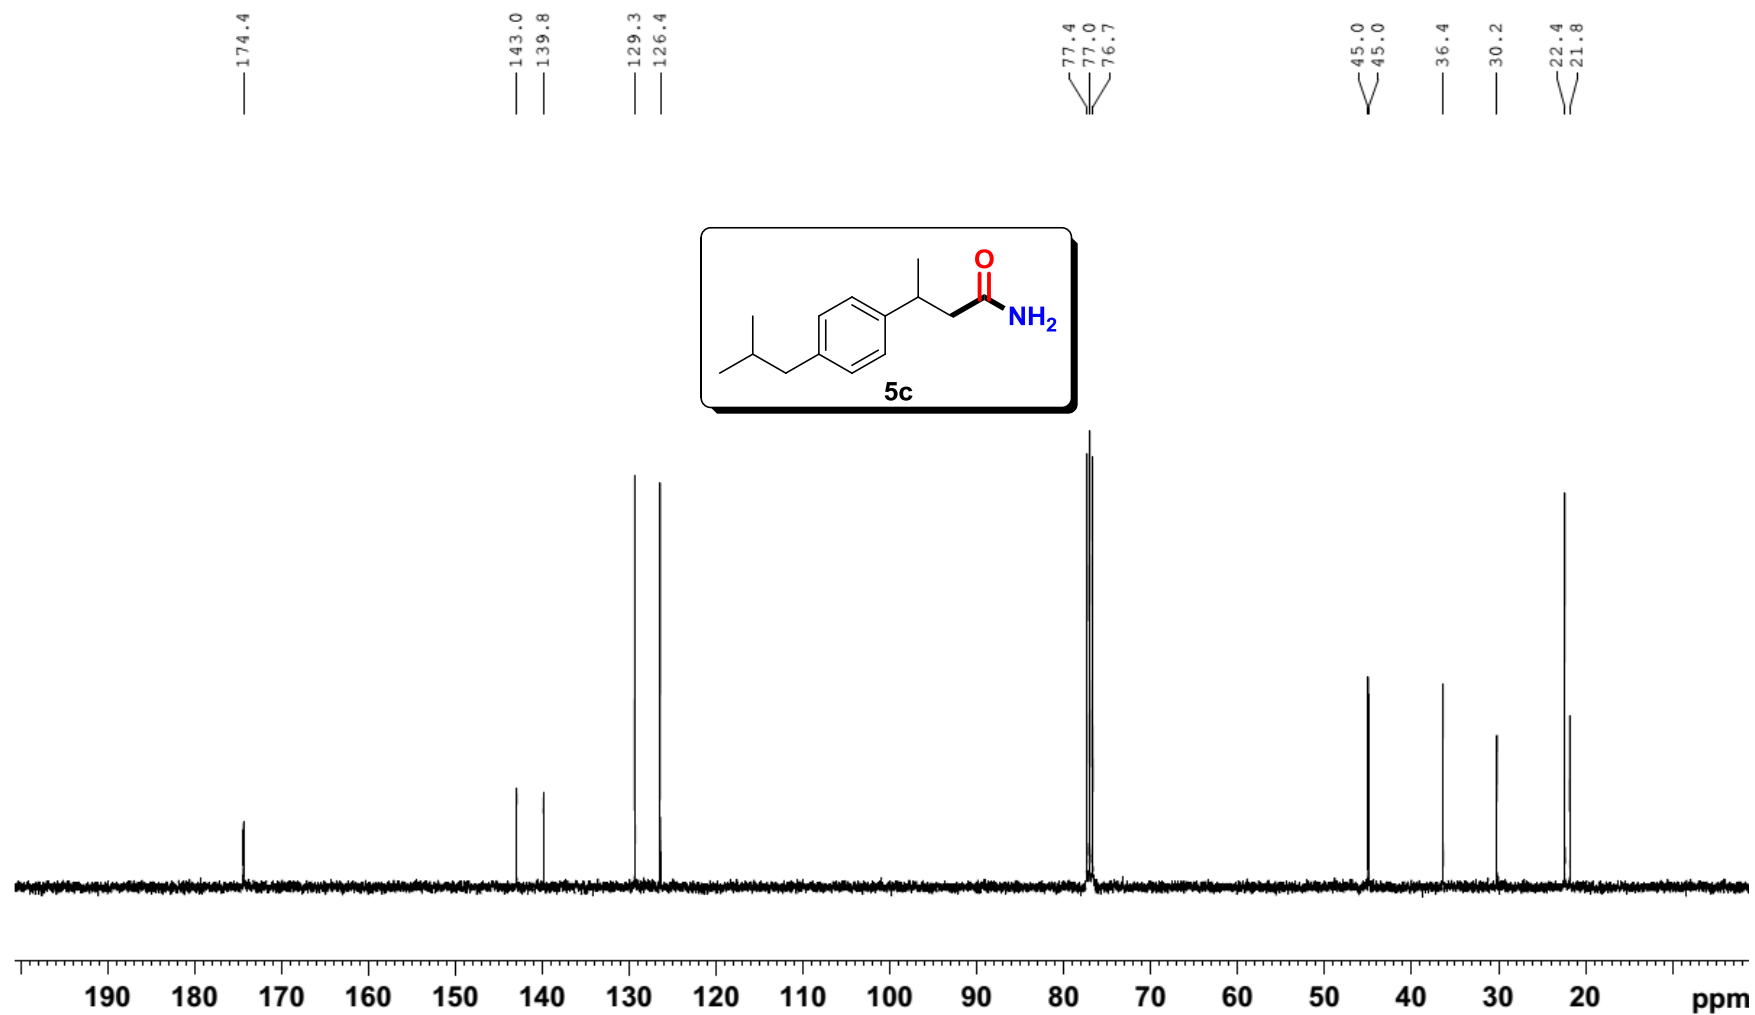

ZGY-X15X26-2-HNMR

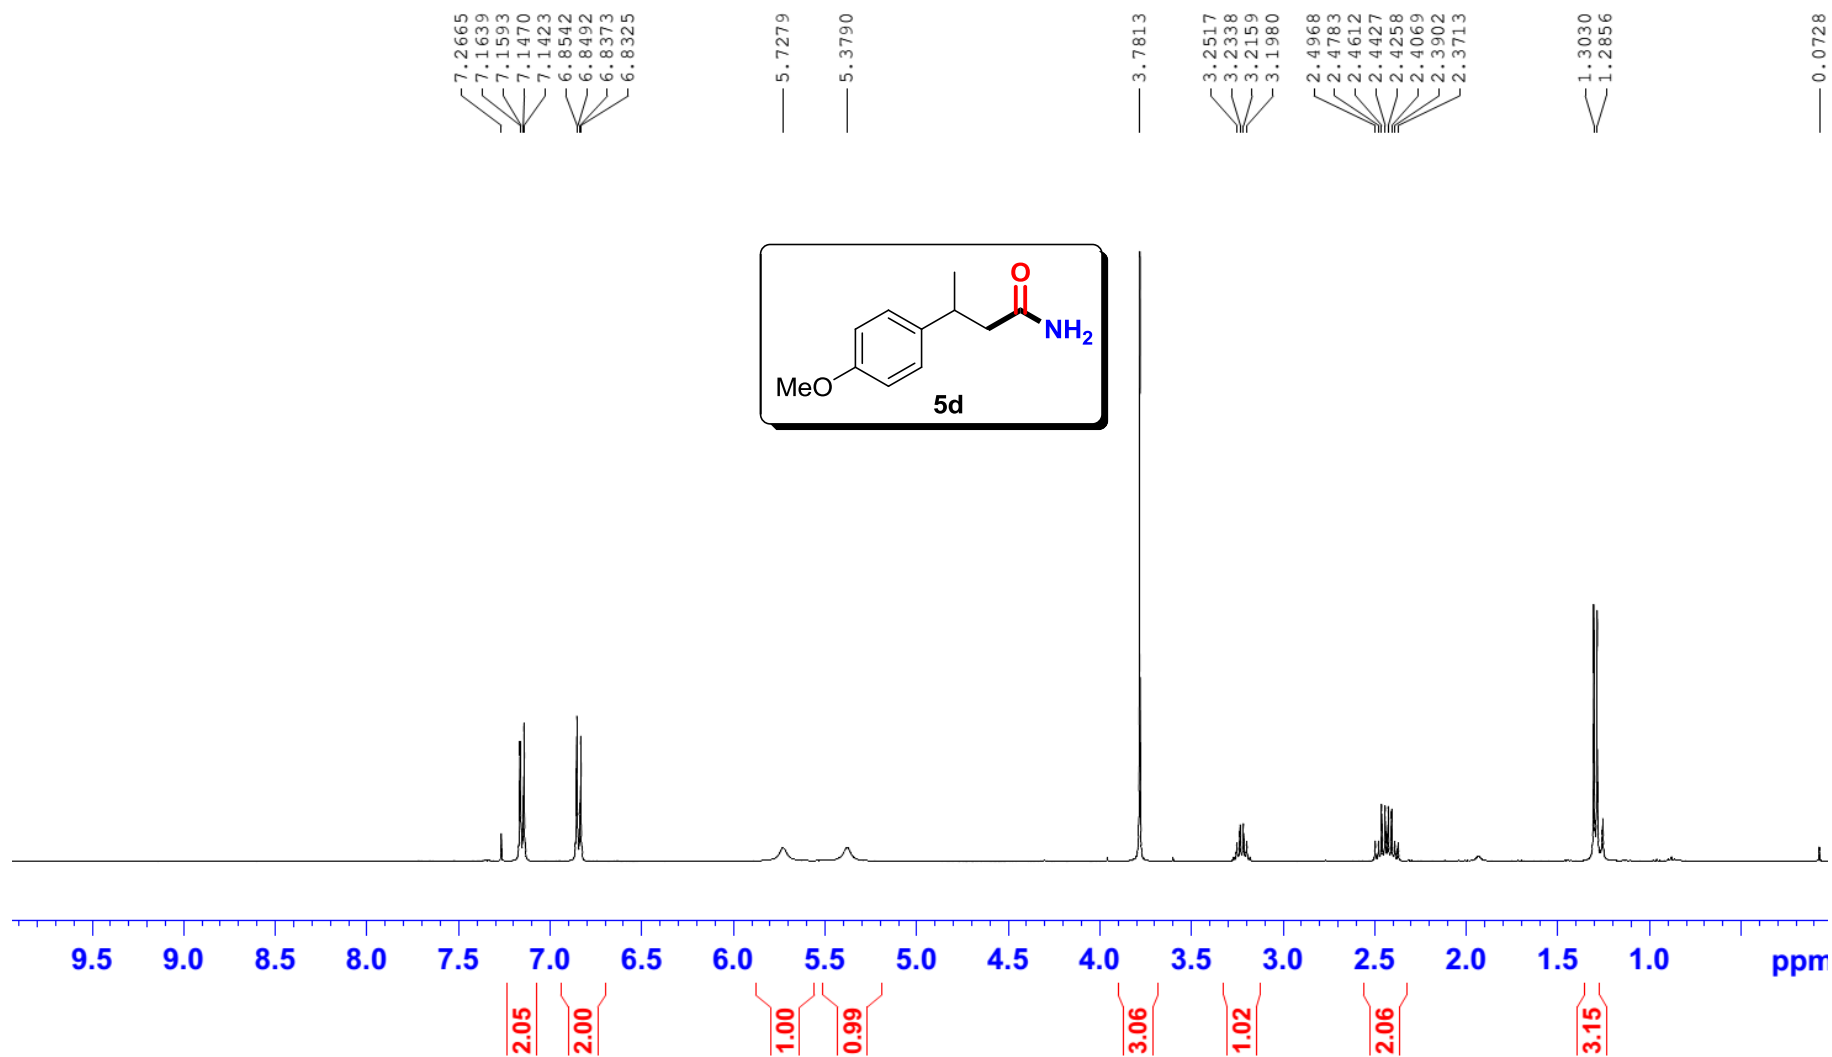

ZGY-X15X26-2-CNMR

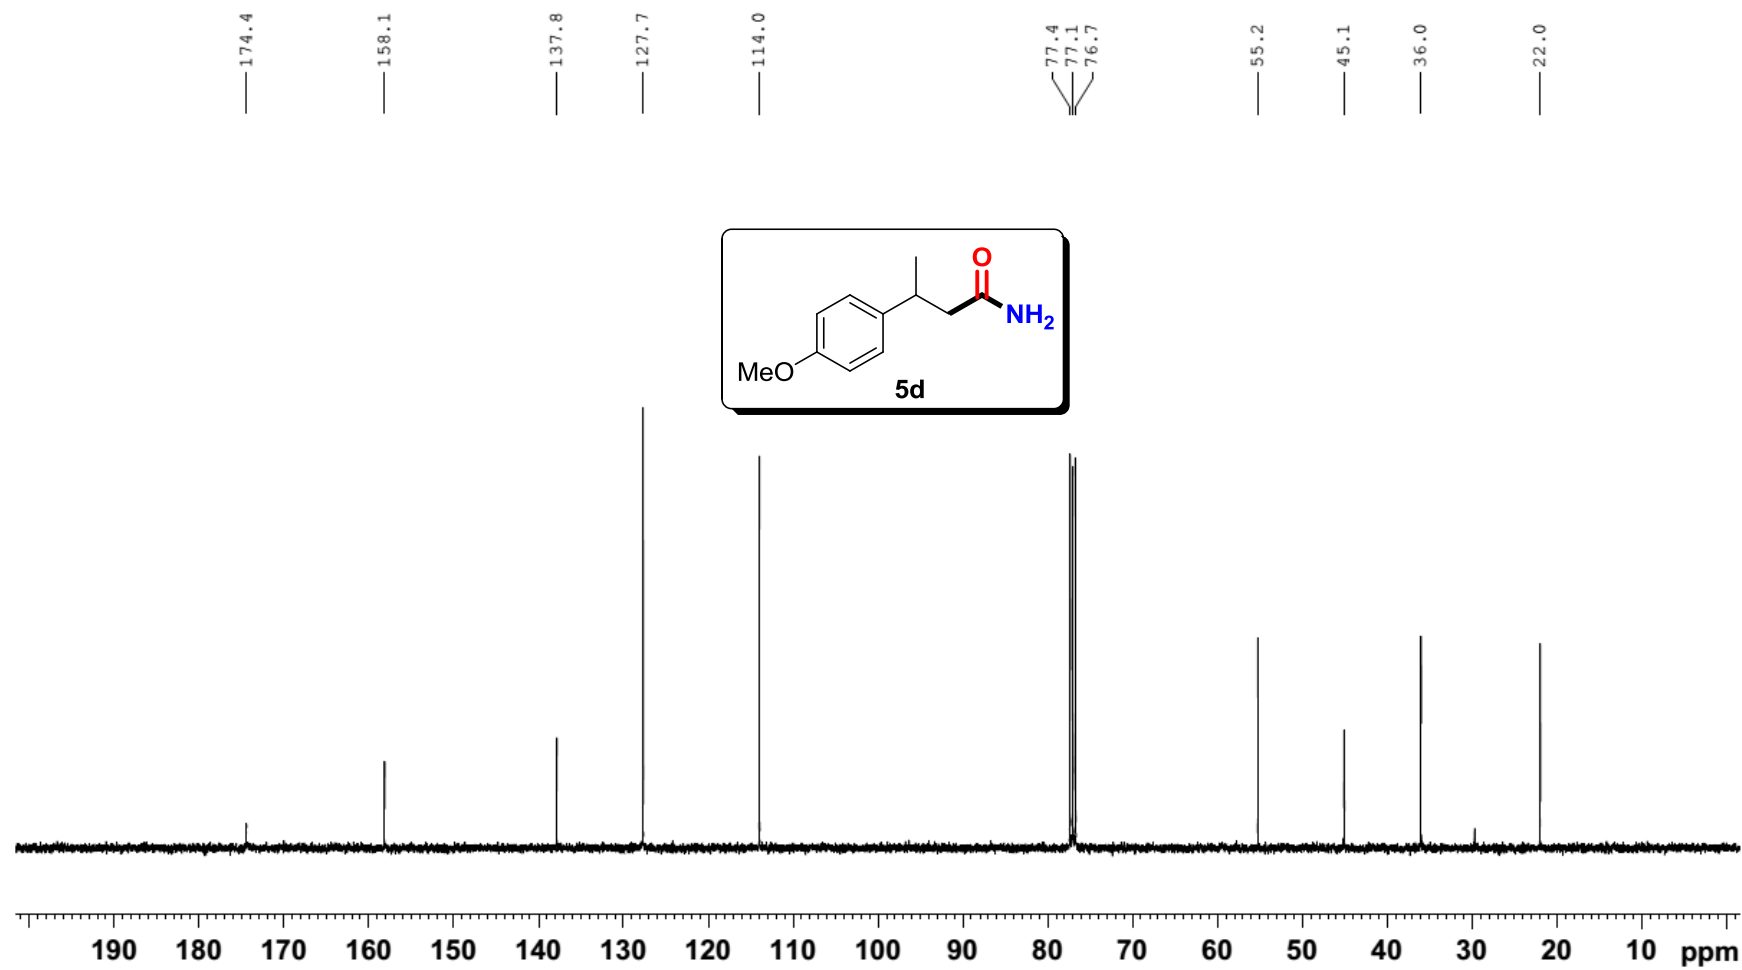



ZGY-X15X21-1-HNMR

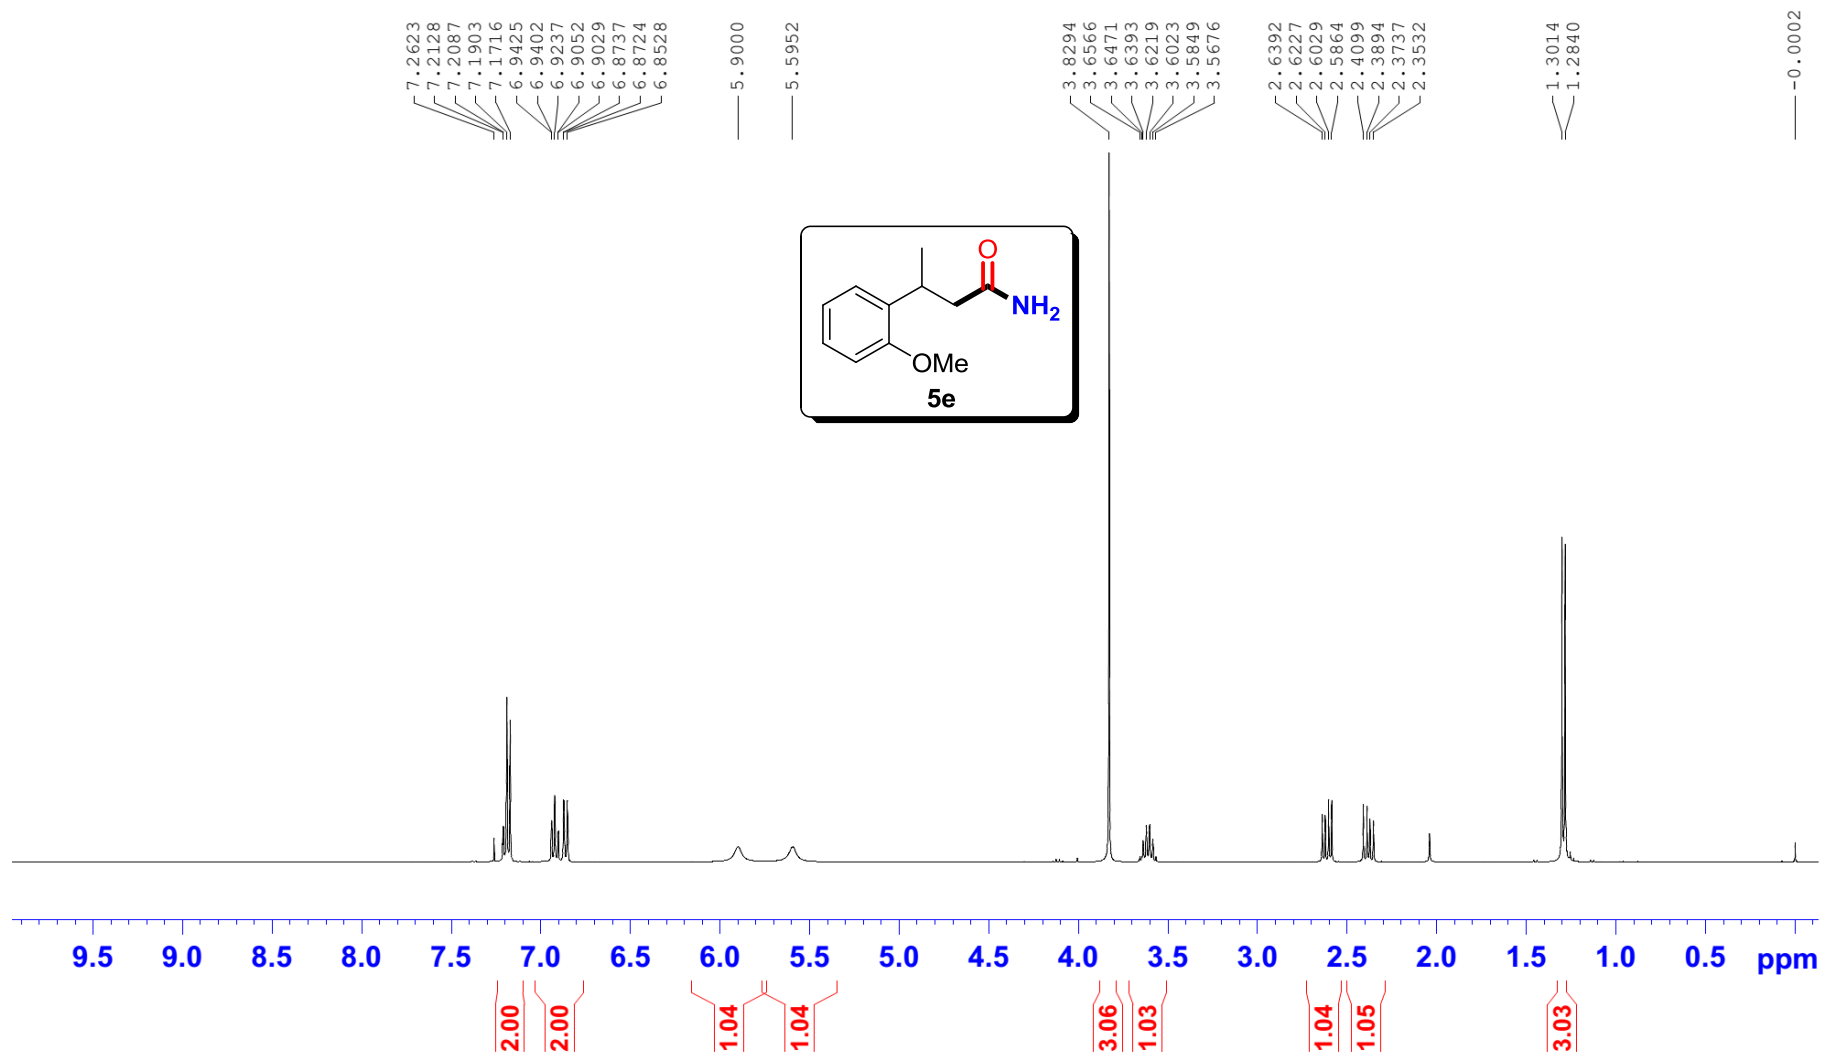

ZGY-X15X21-1-CNMR

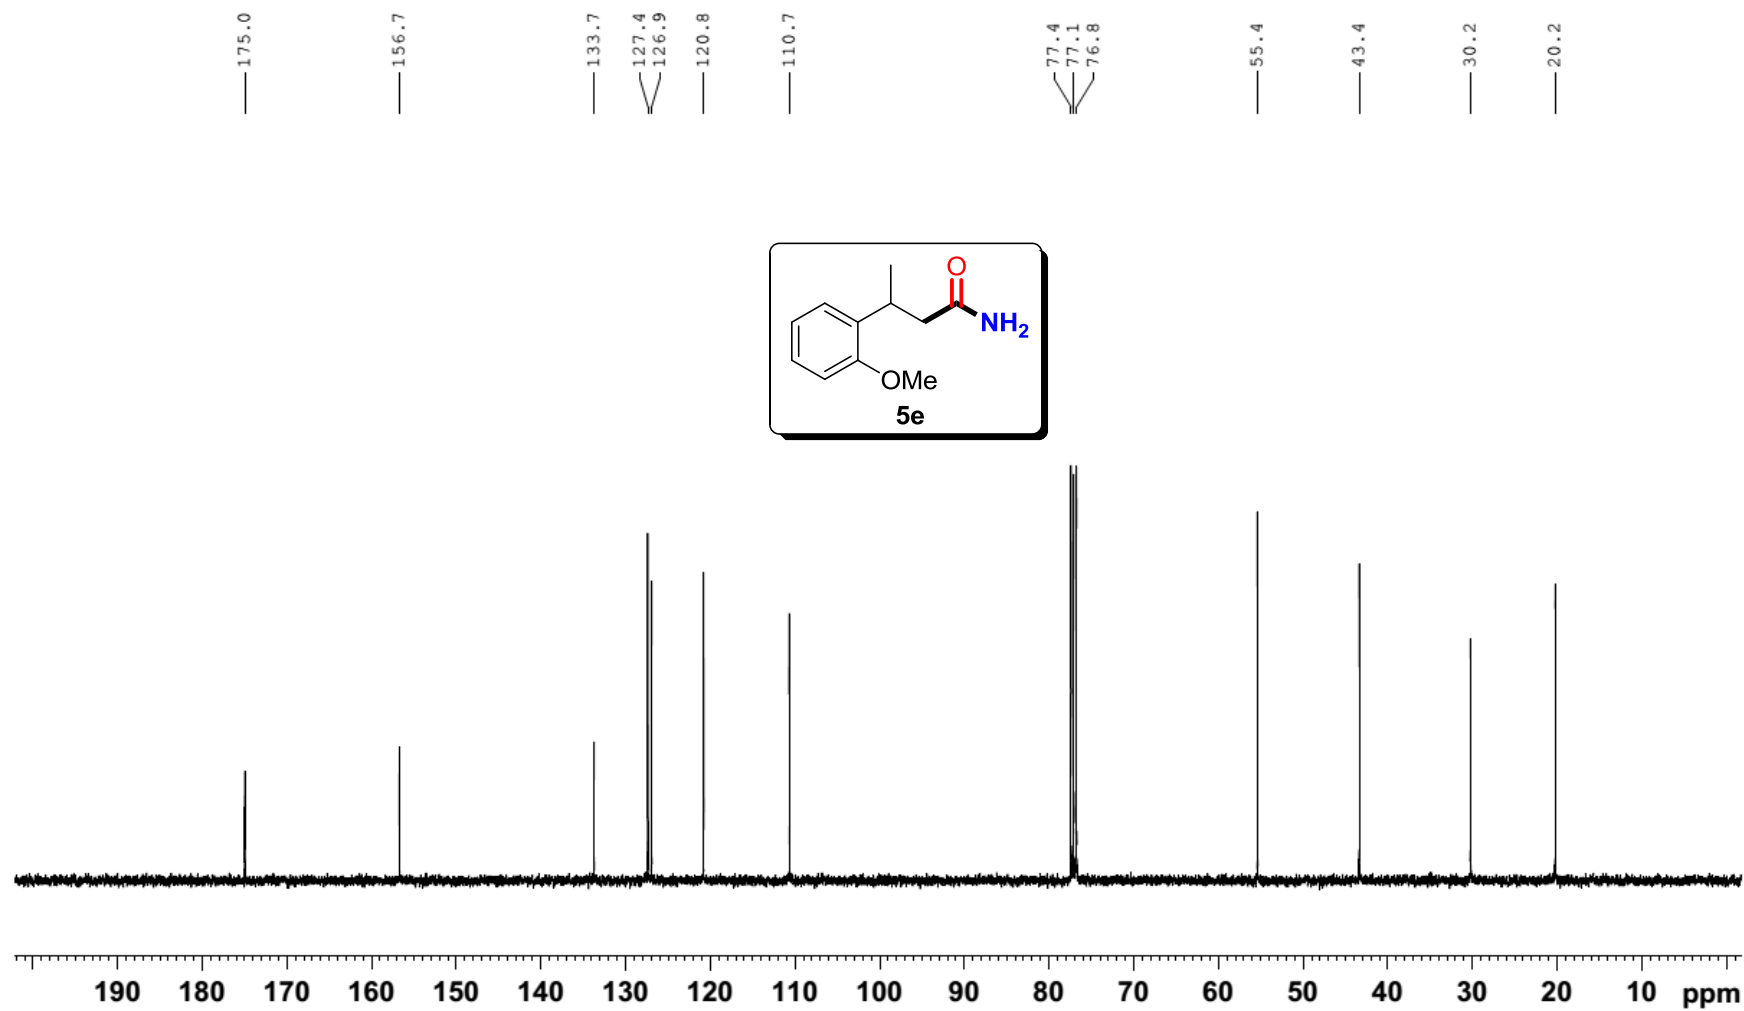

ZGY-X15X27-3-HNMR

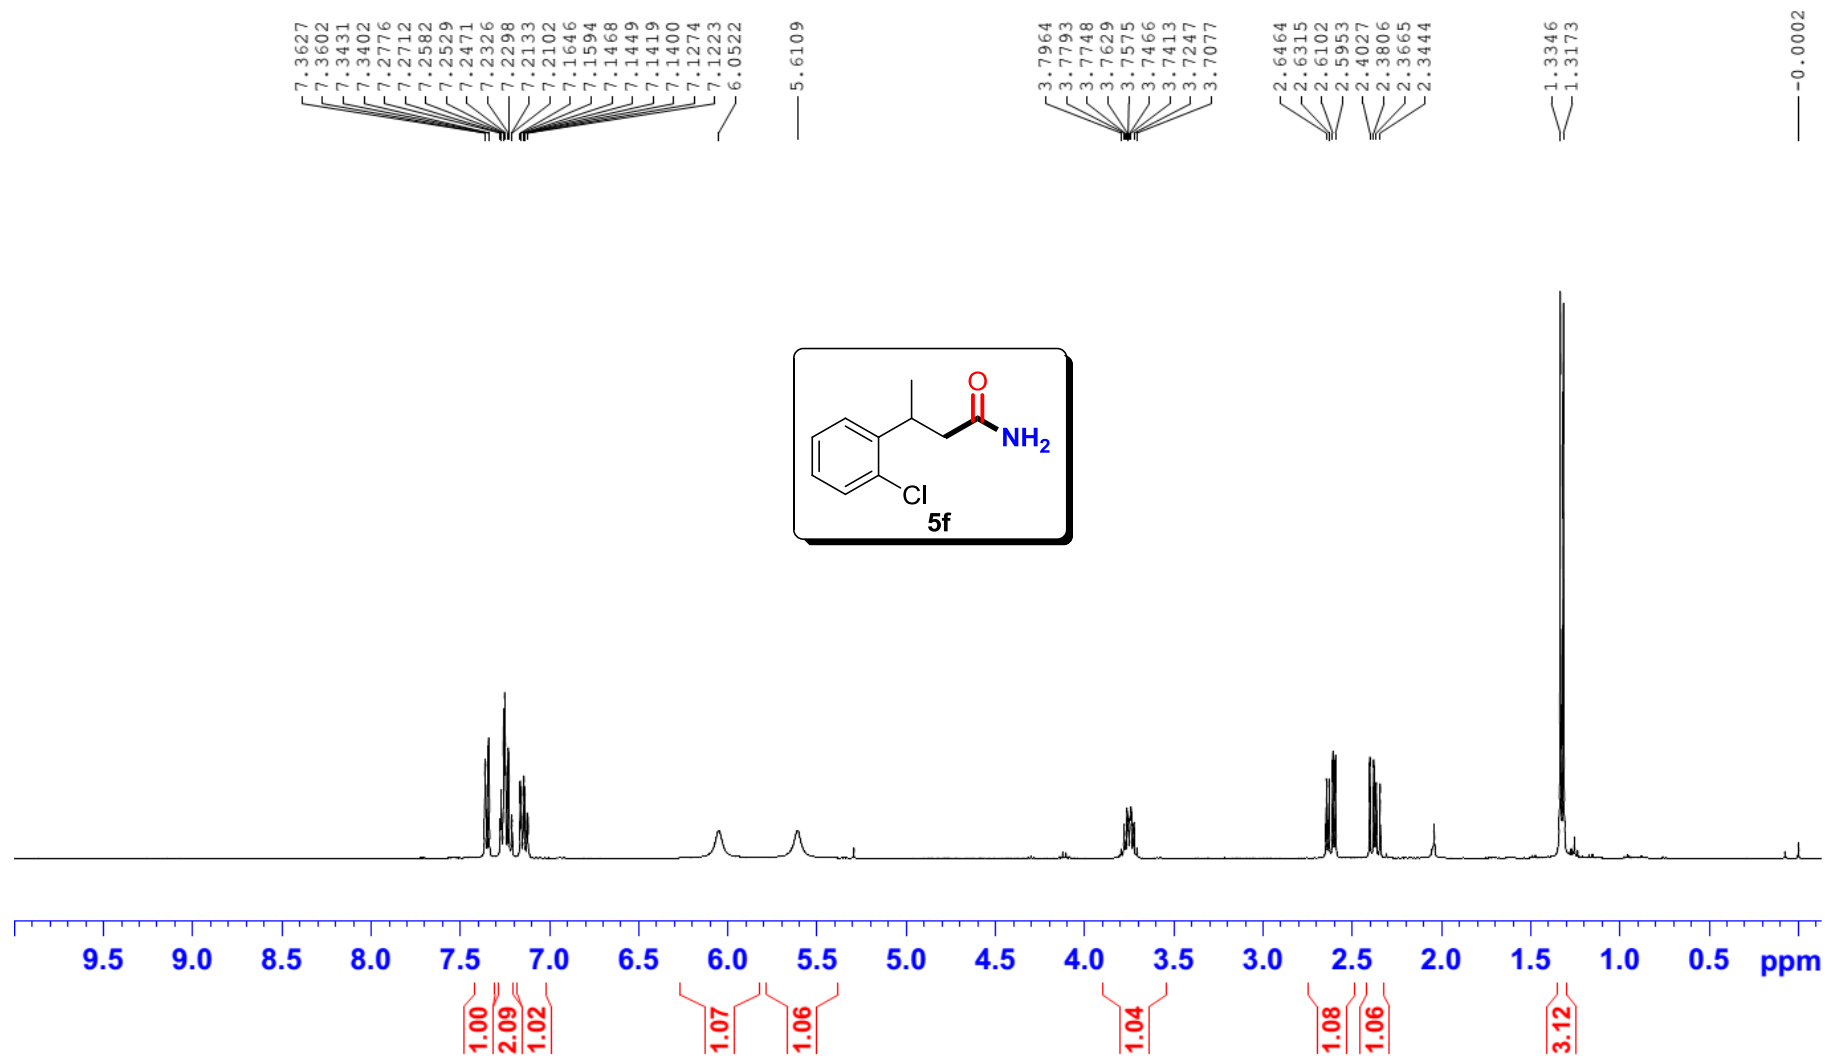

ZGY-X15X21-4-CNMR

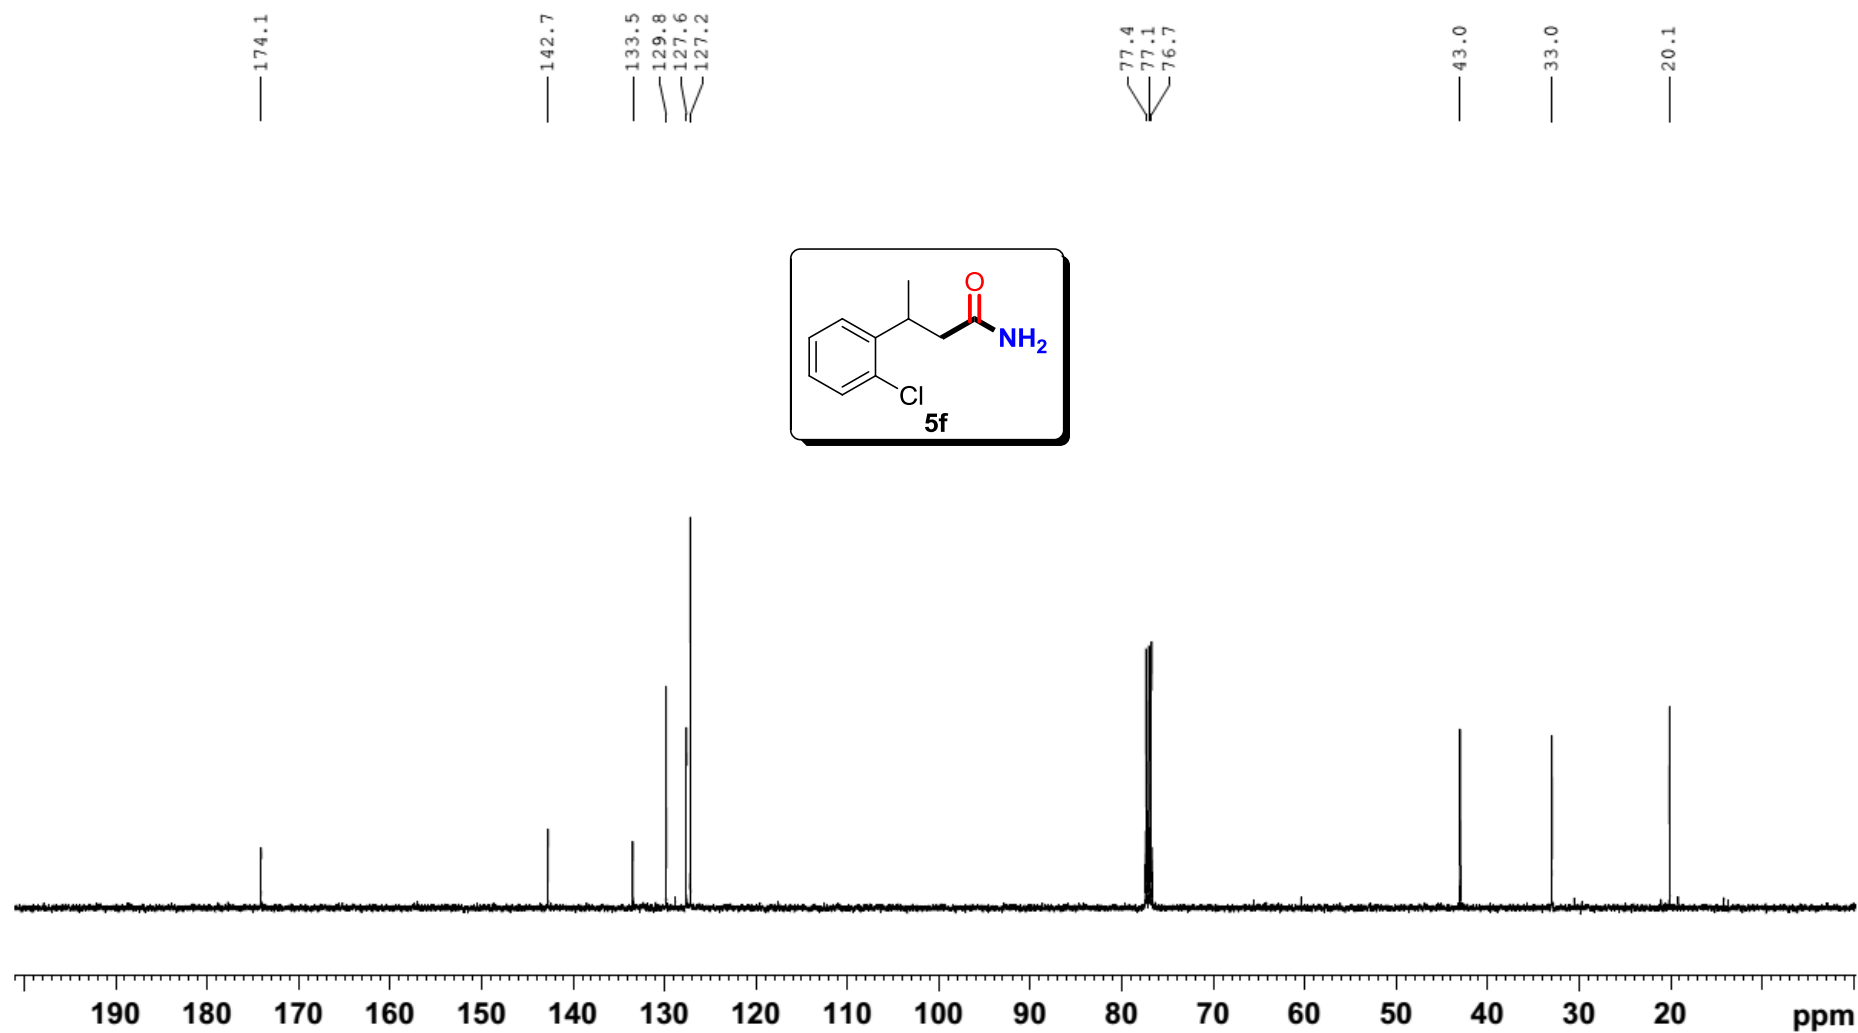

ZGY-X15Y10-2-HNMR

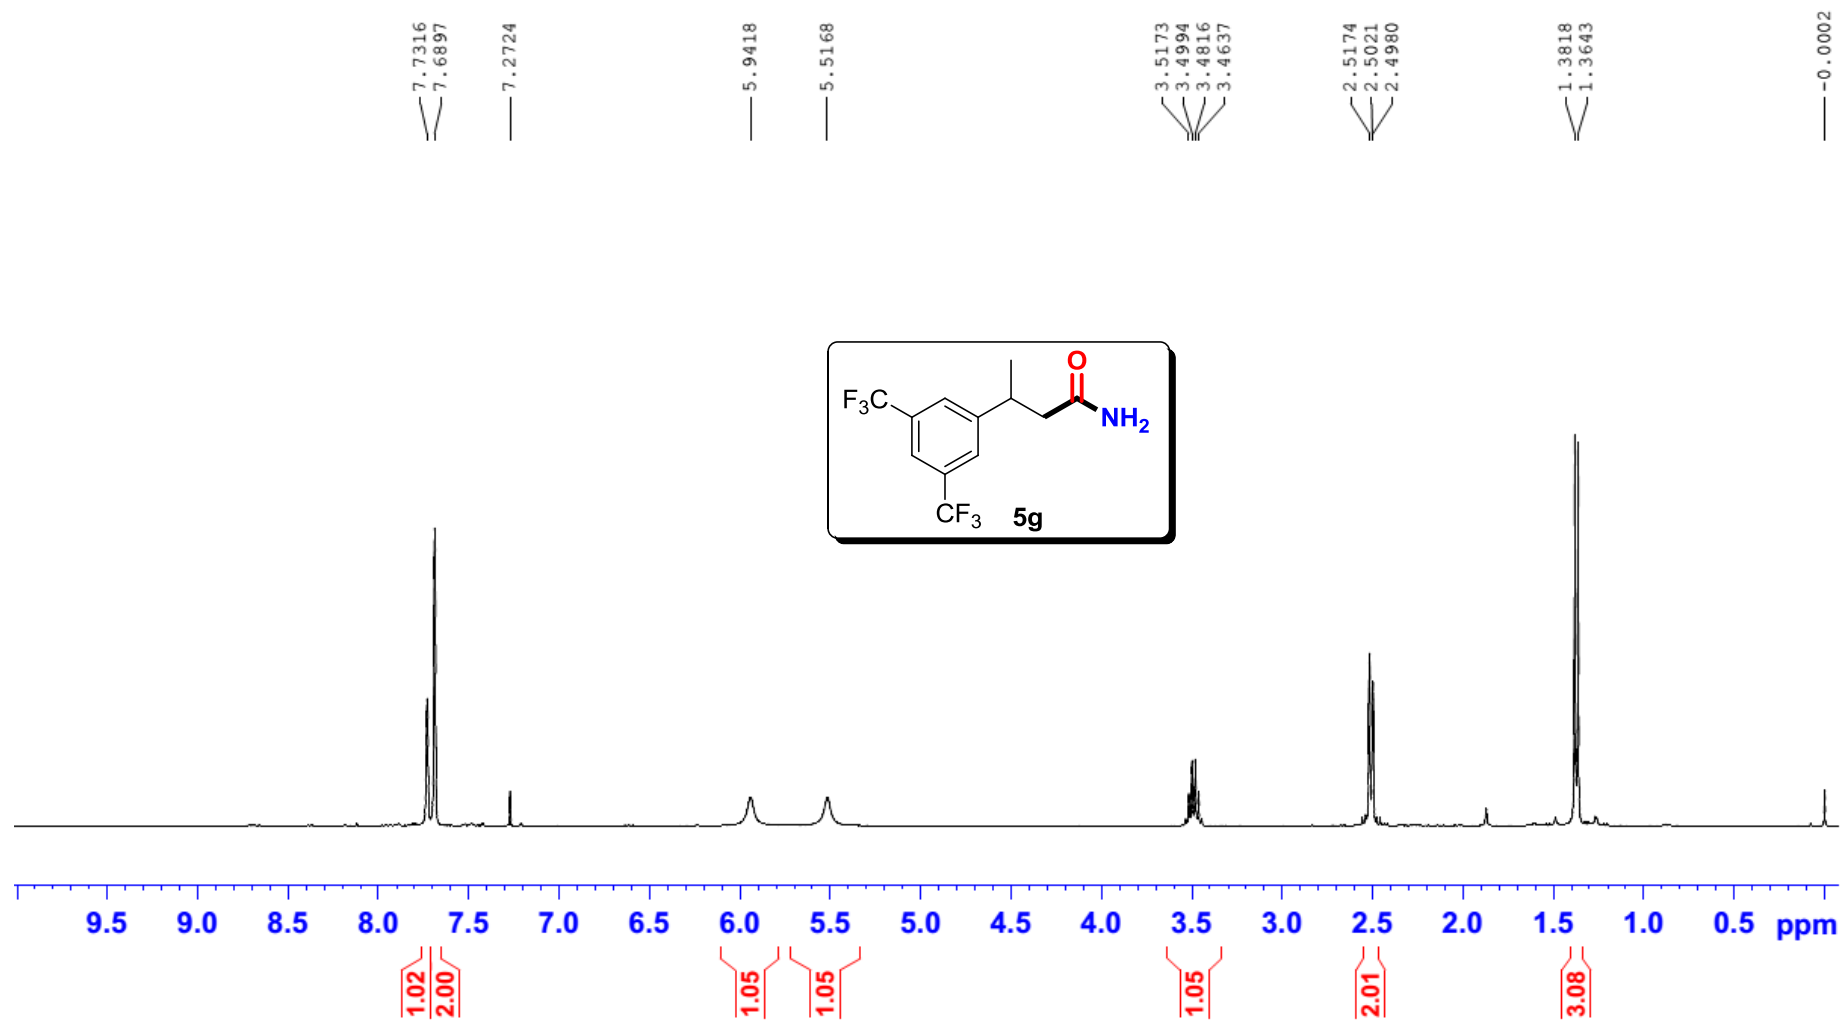

ZGY-X15Y10-2-CNMR

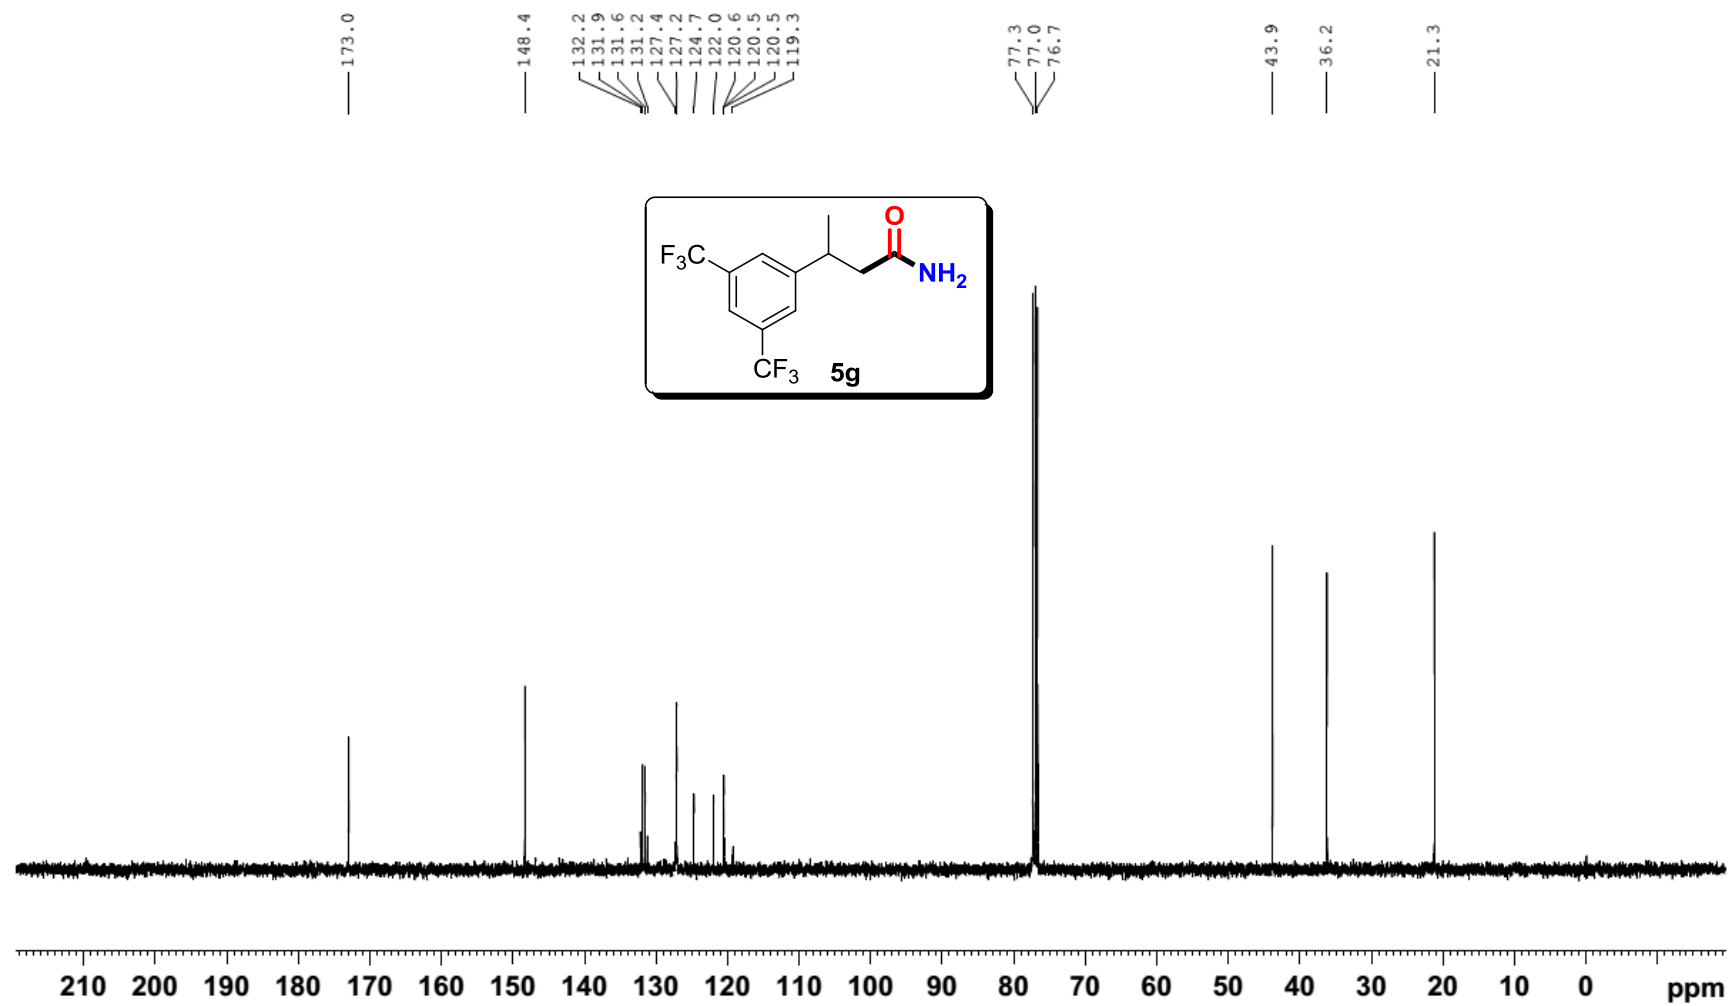

ZGY-X15Y04-1-FNMR

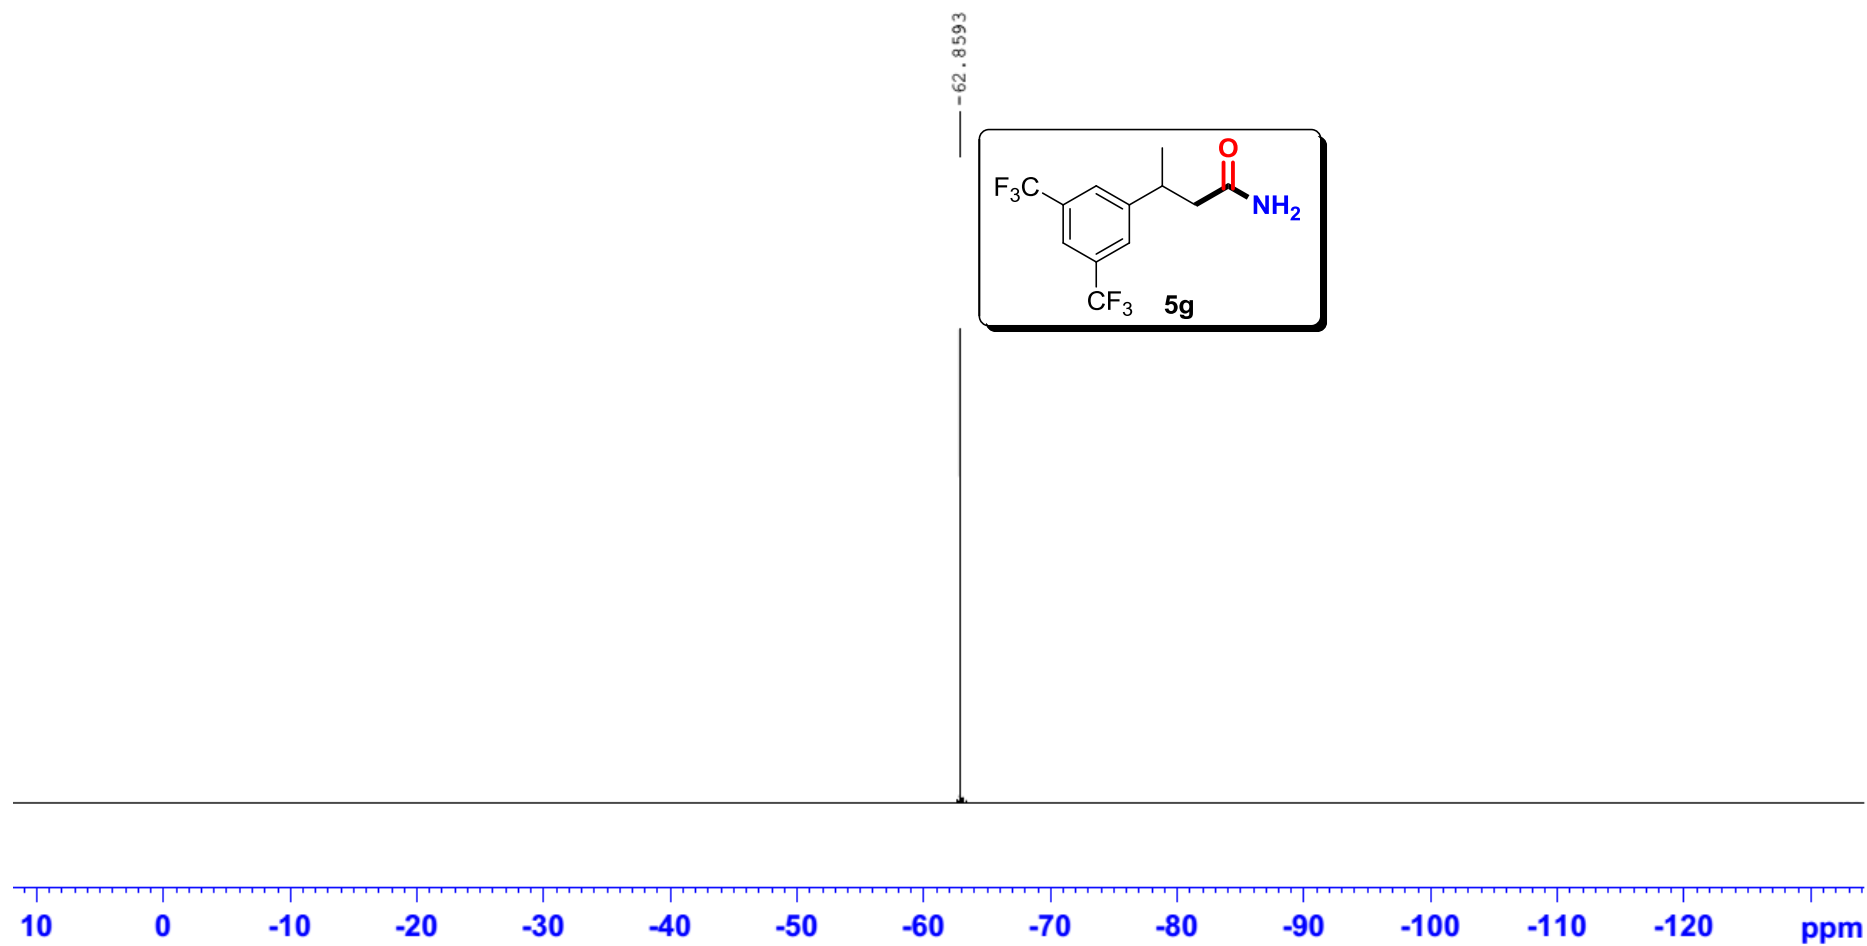

ZGY-X15Y09-4-HNMR

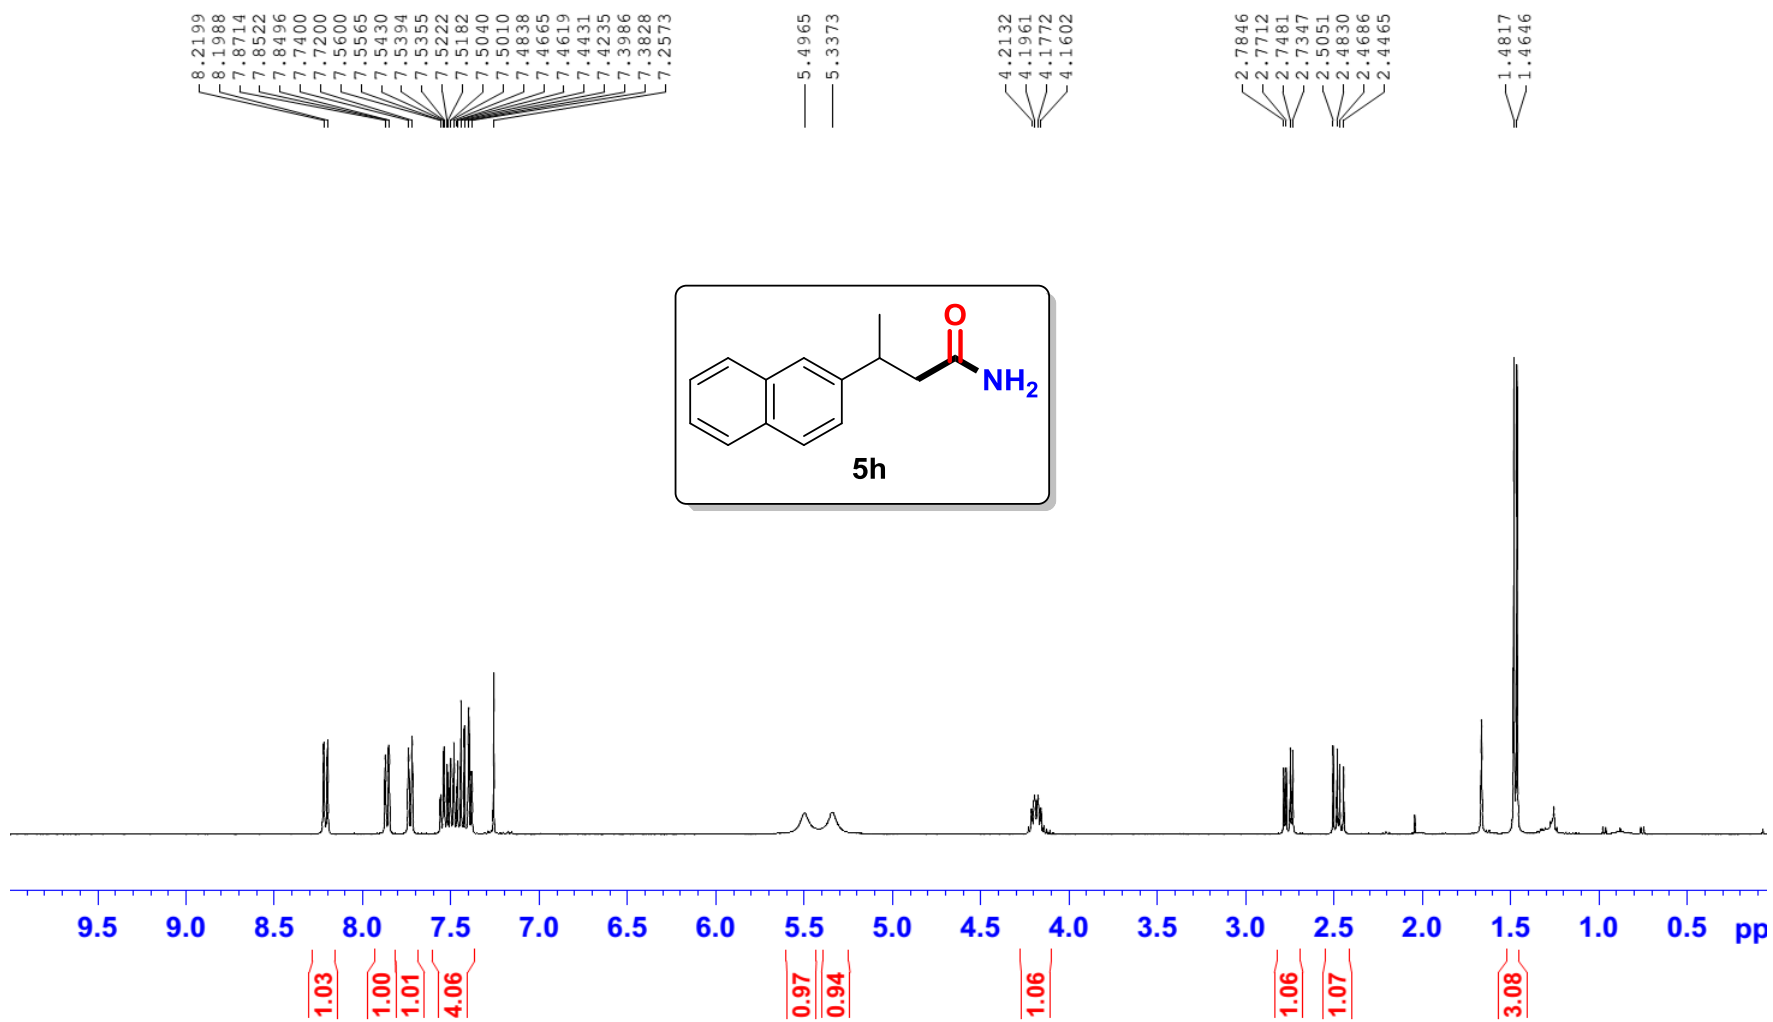



ZGY-X15Y09-4-CNMR

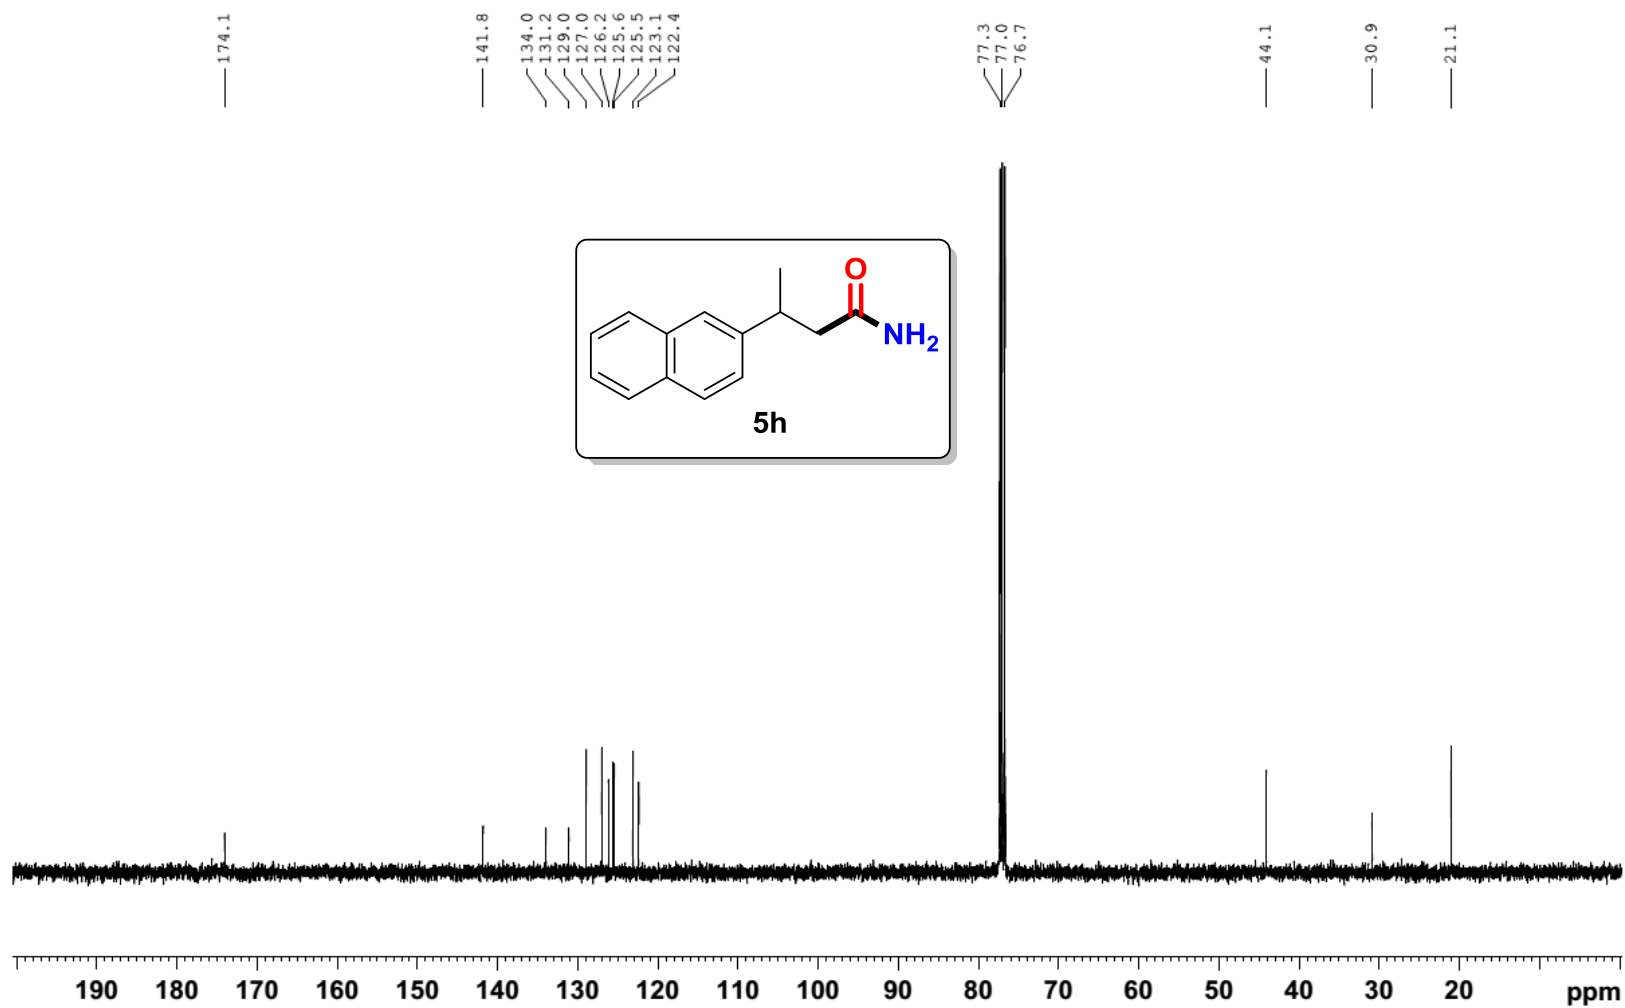

ZGY-X15X28-2 H NMR

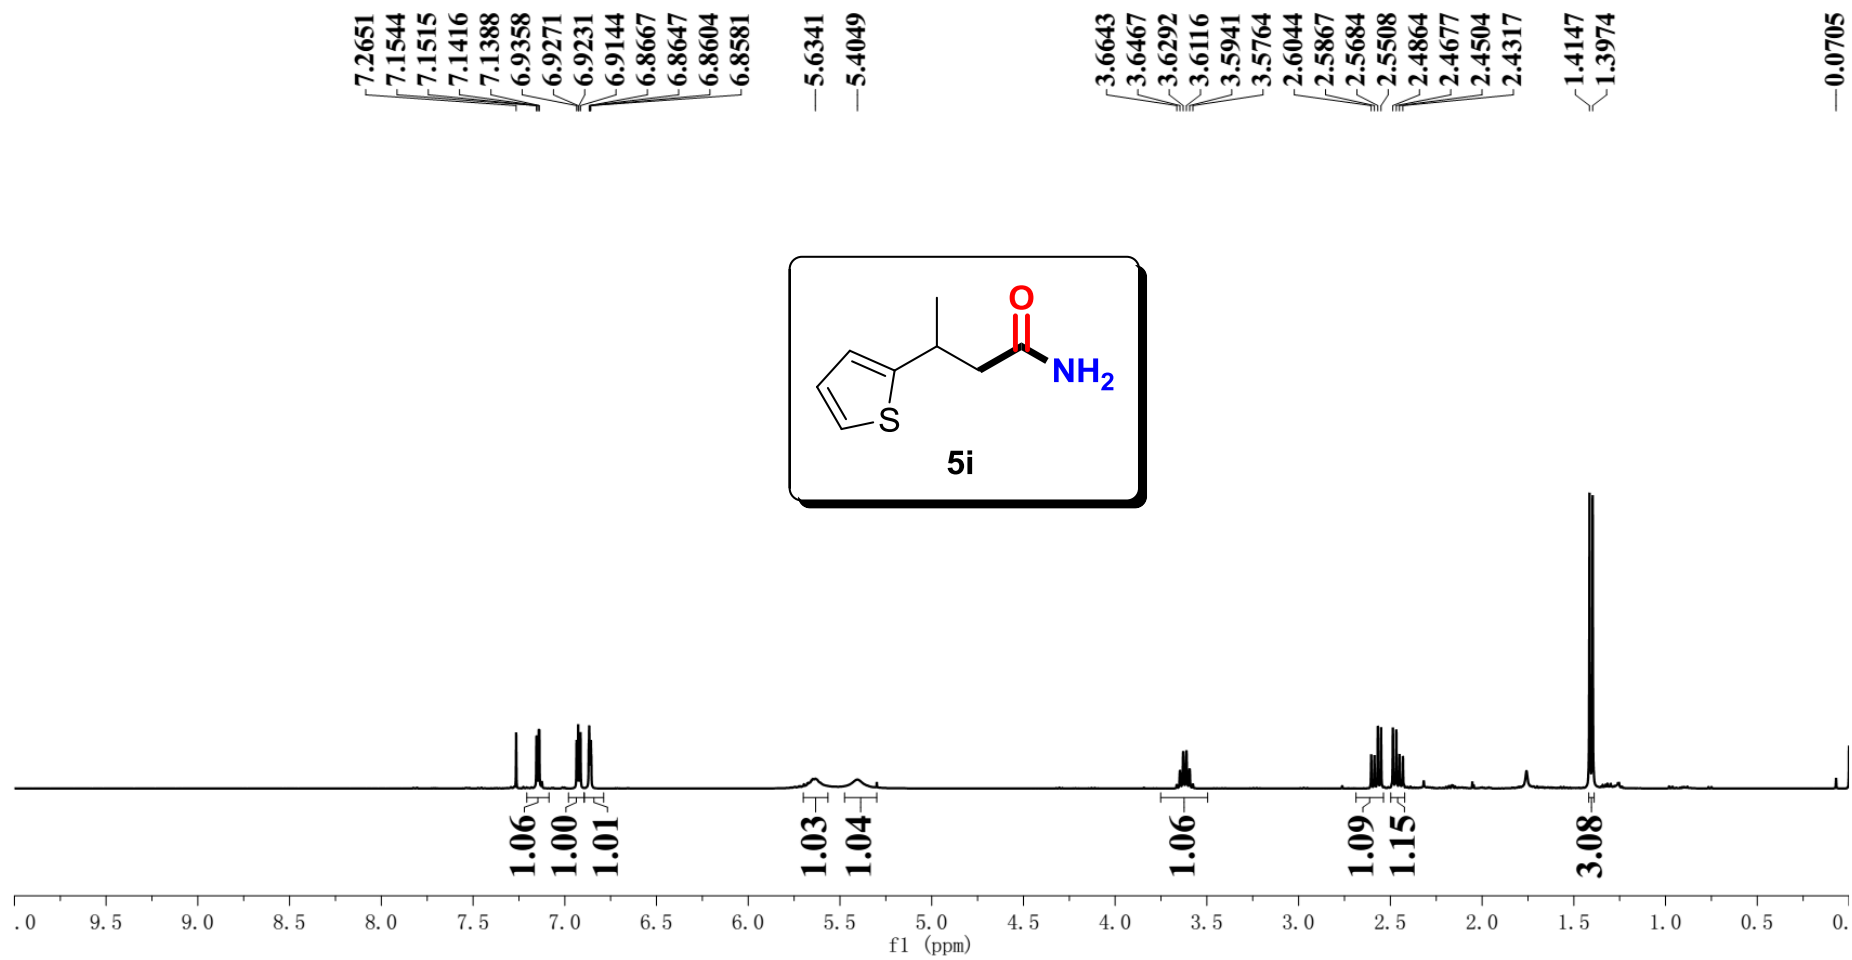

ZGY-X15X28-2-CNMR

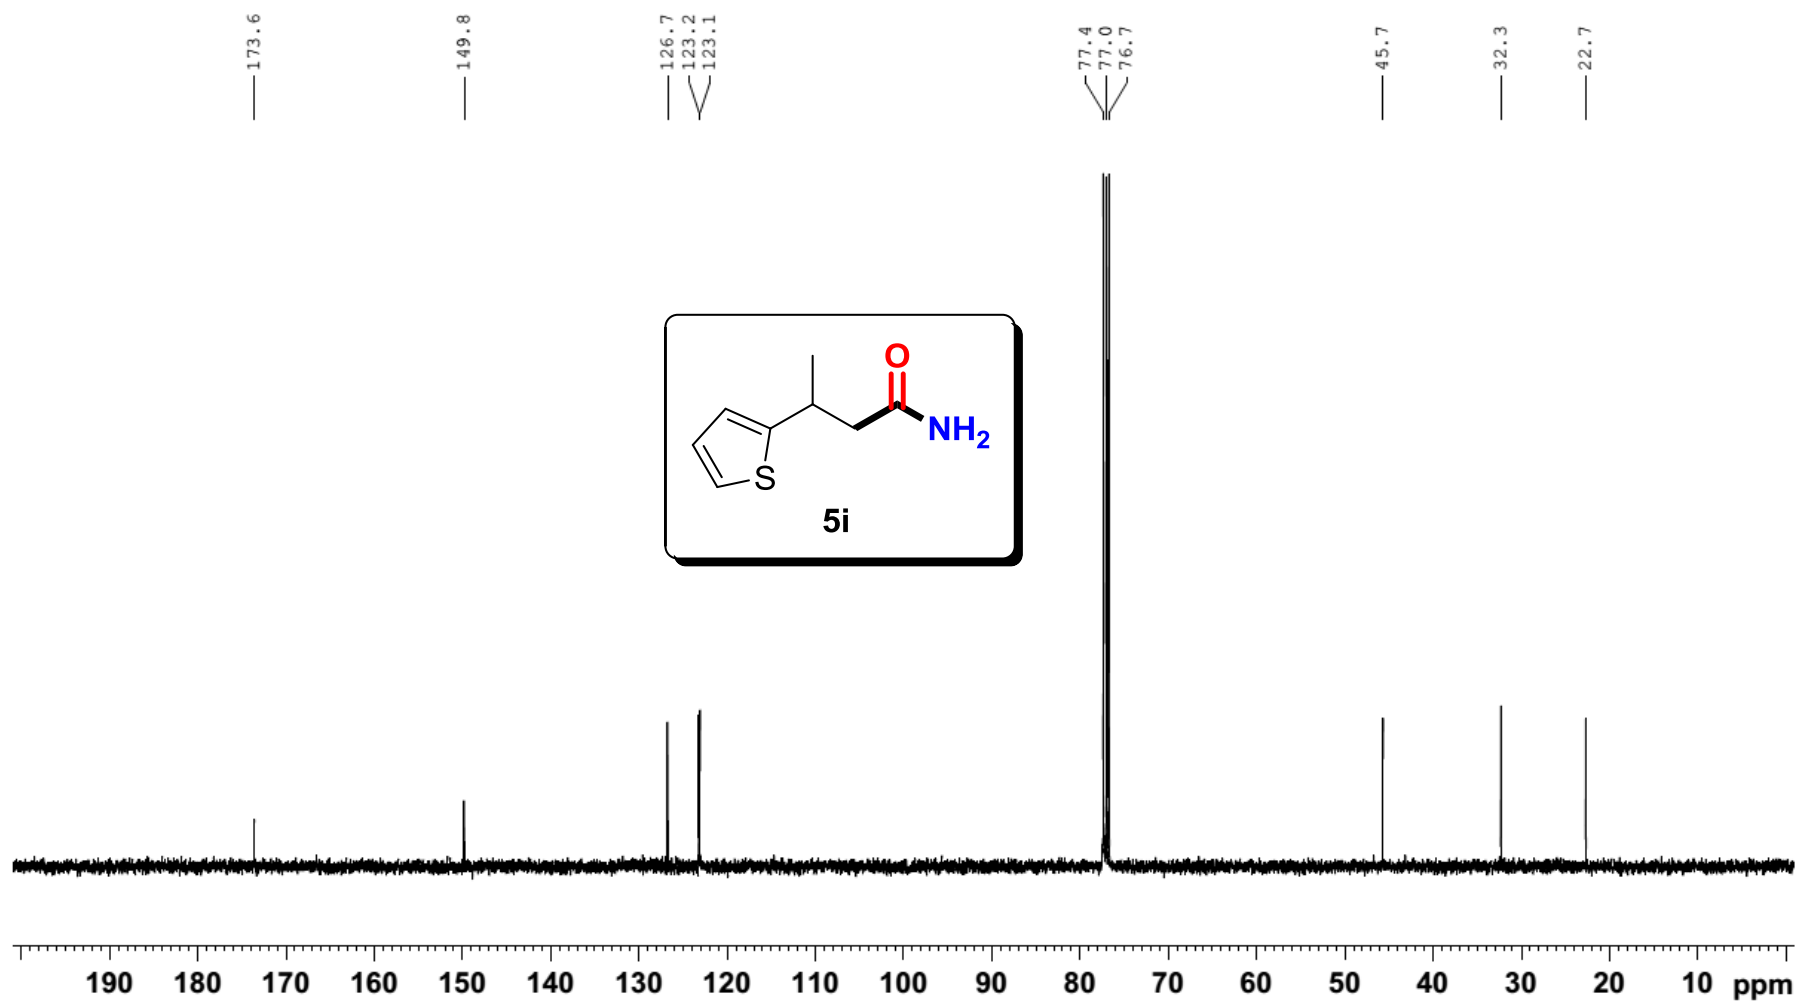

ZGY-X15X27-4-HNMR

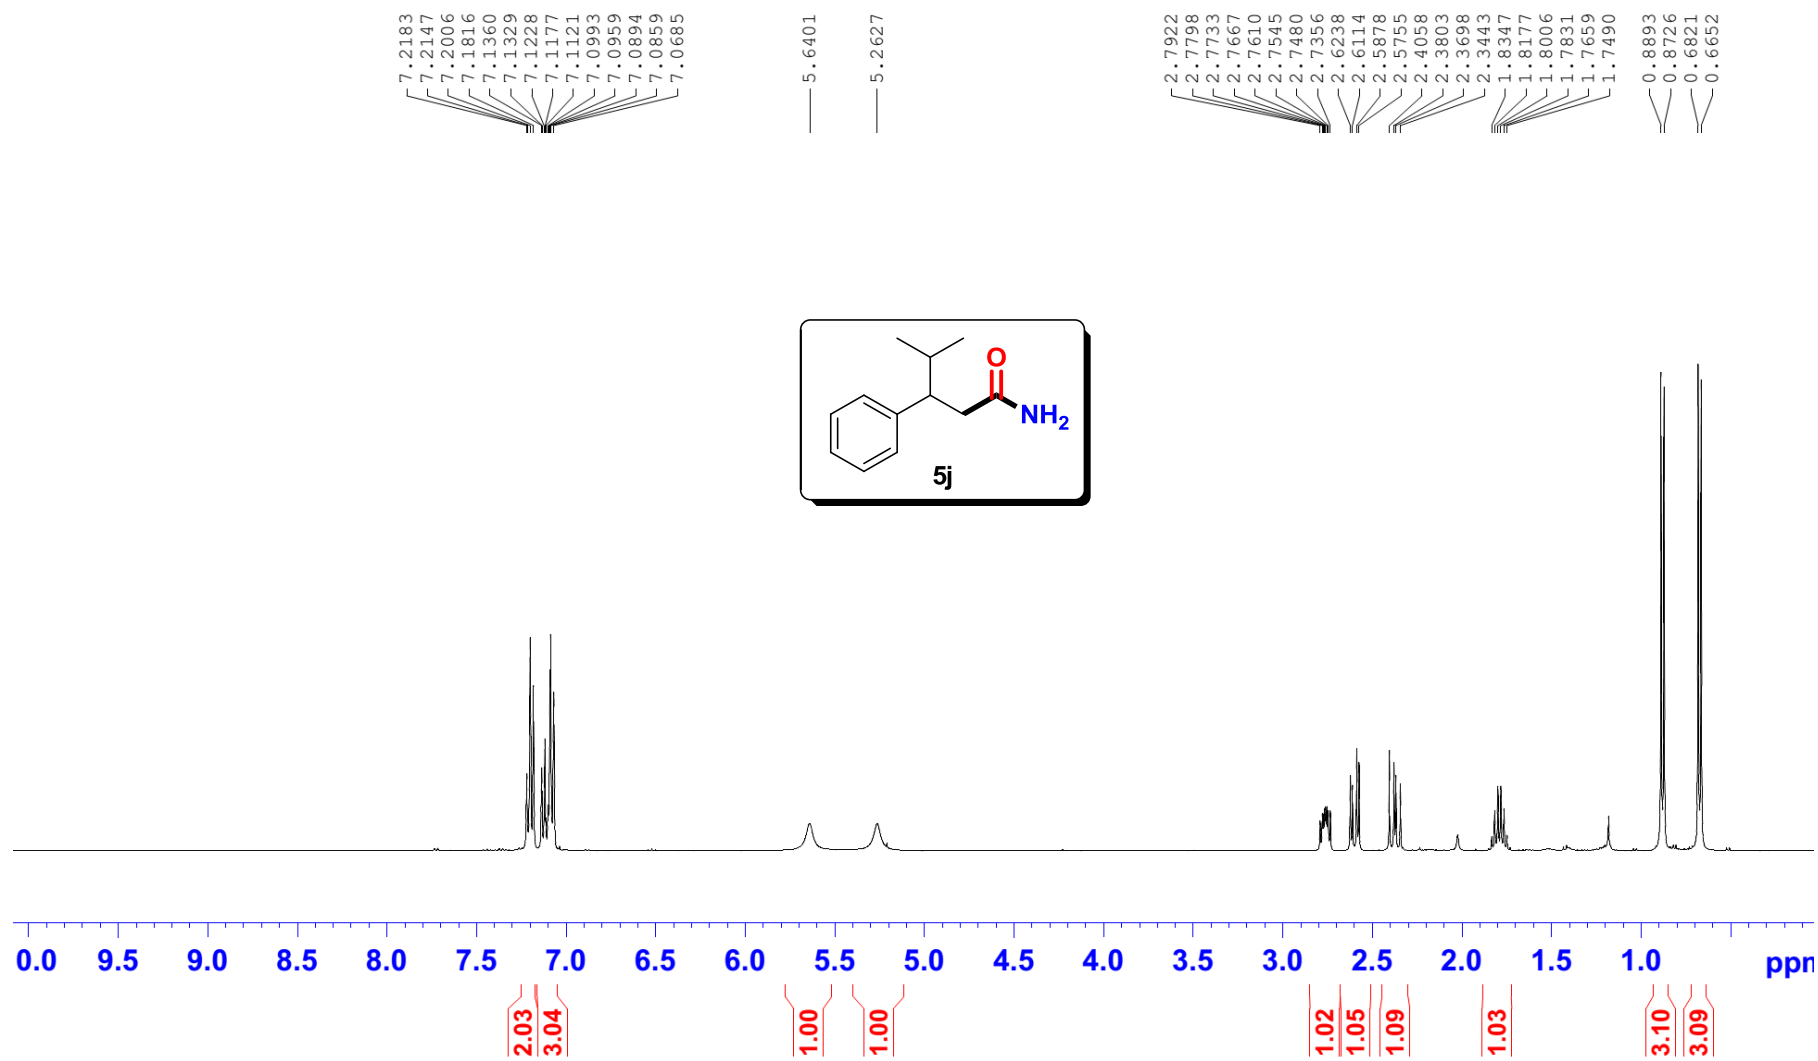

ZGY-X15X27-4-CNMR

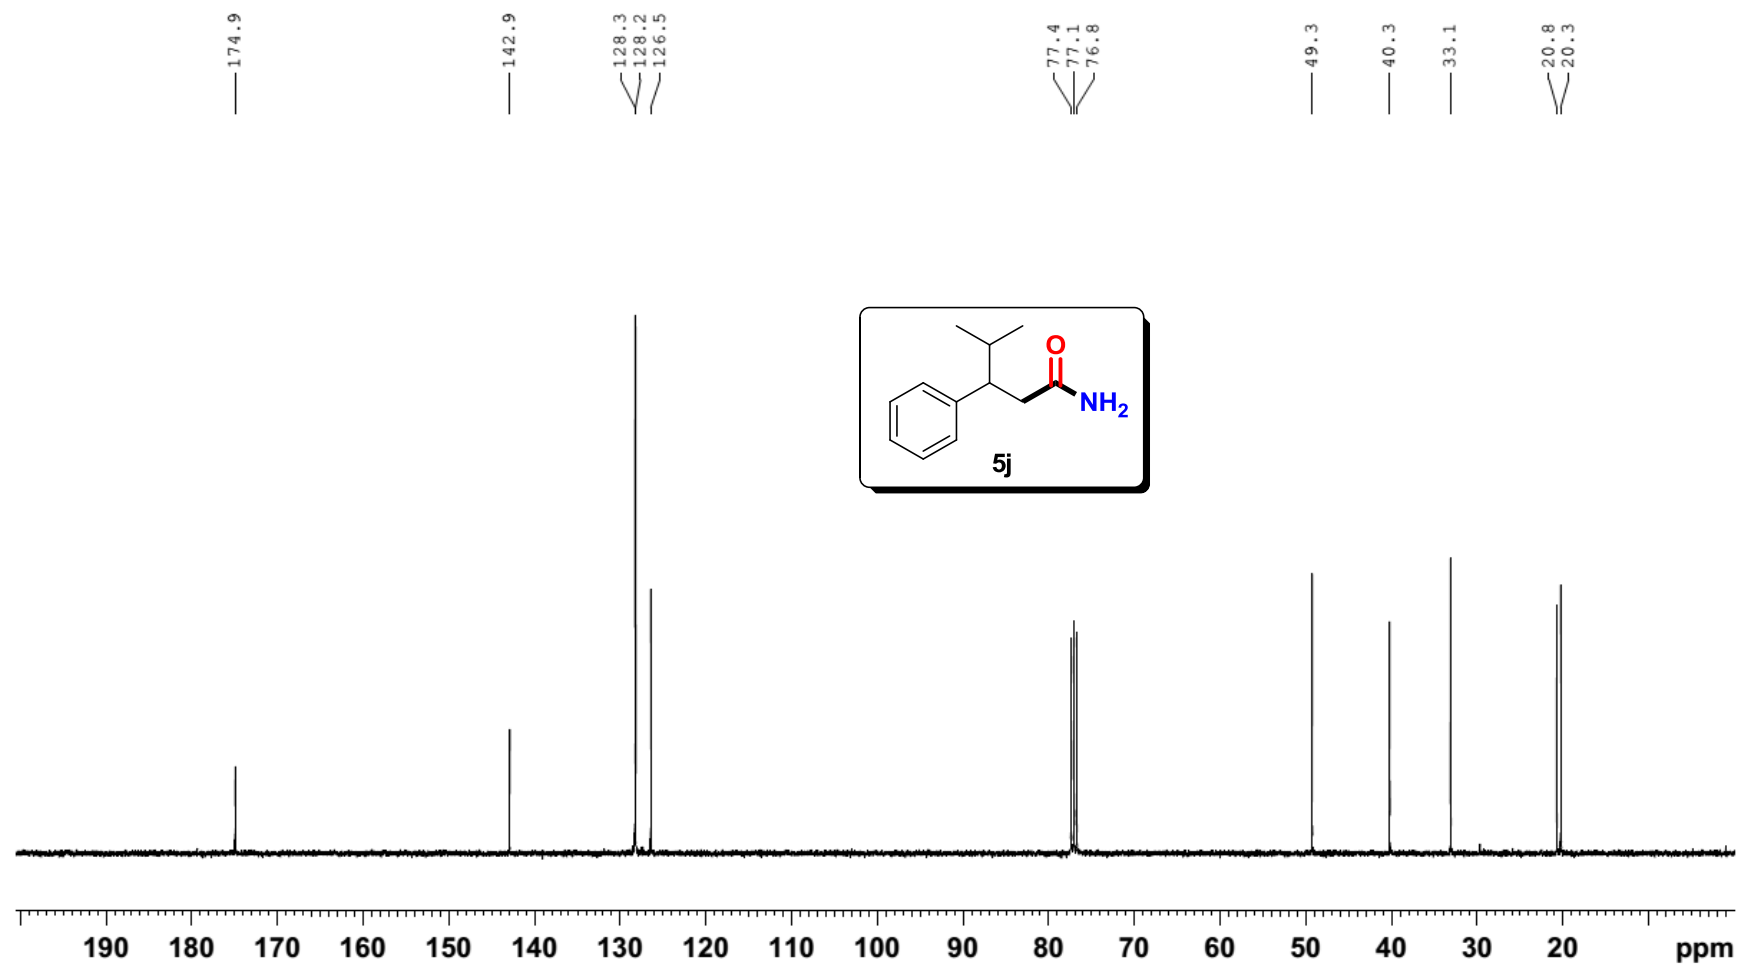

ZGY-X15X26-4-HNMR

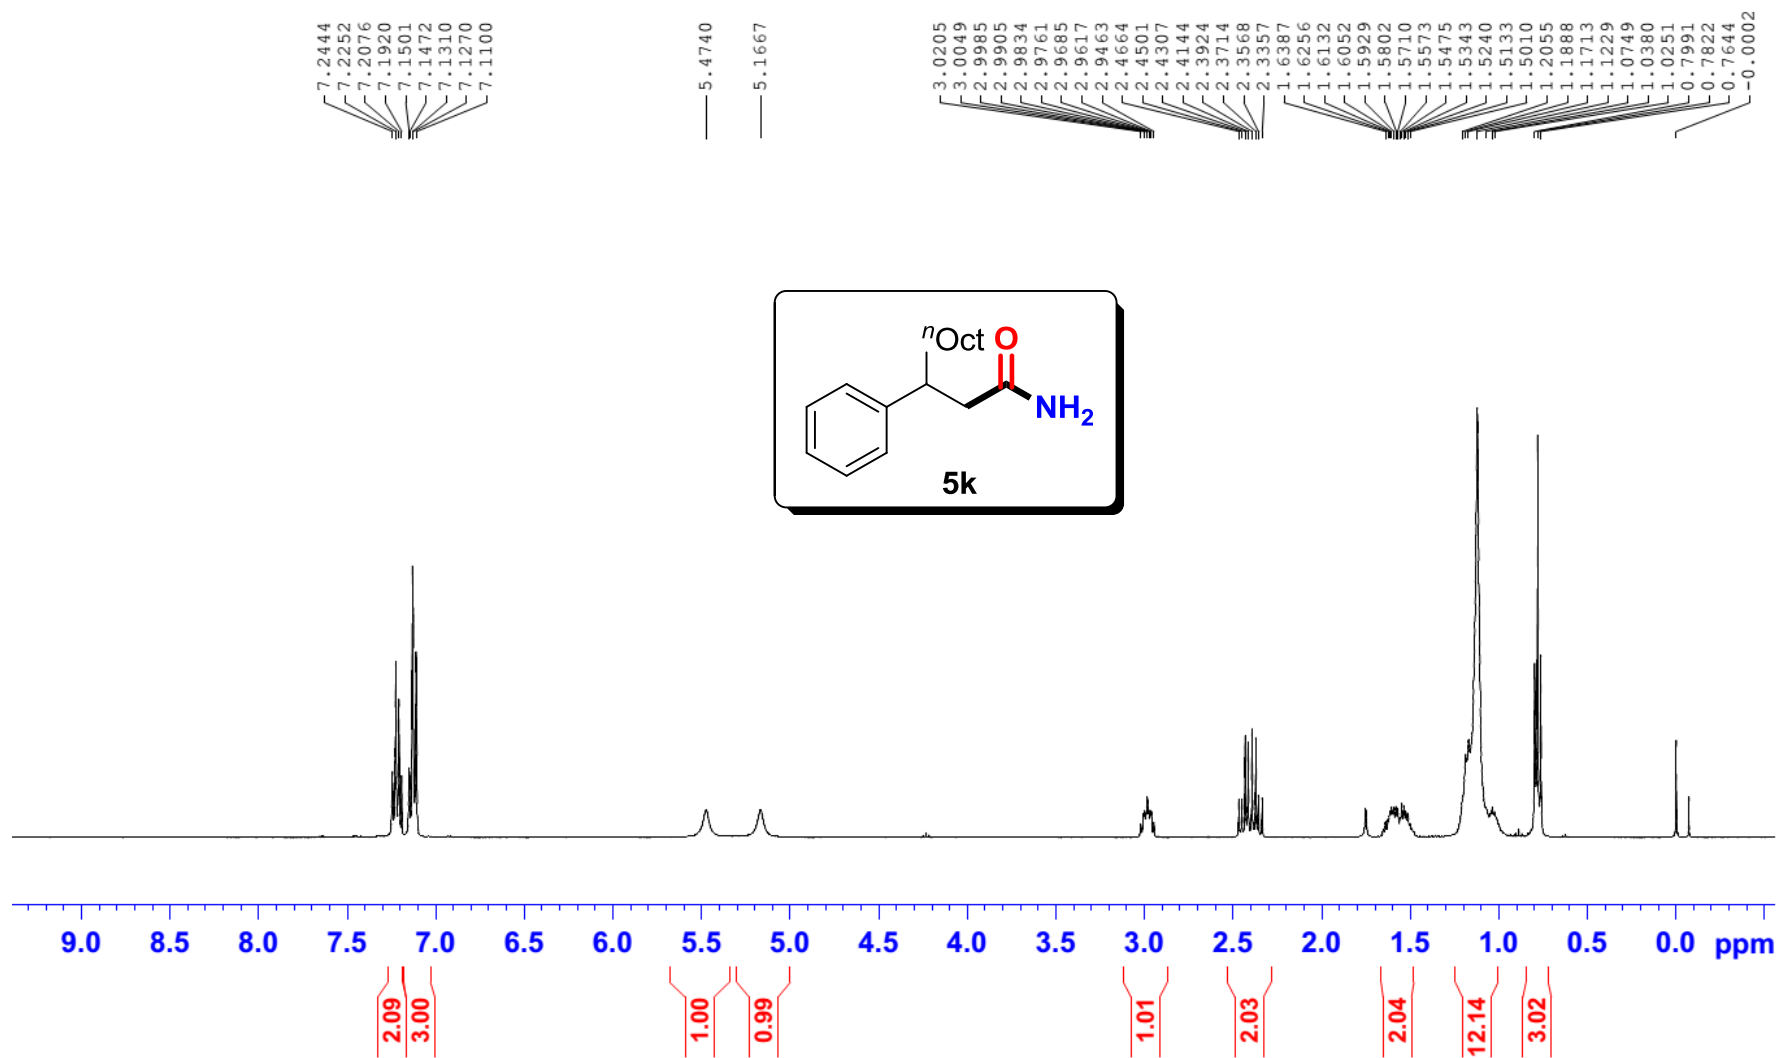

ZGY-X15X26-4-CNMR

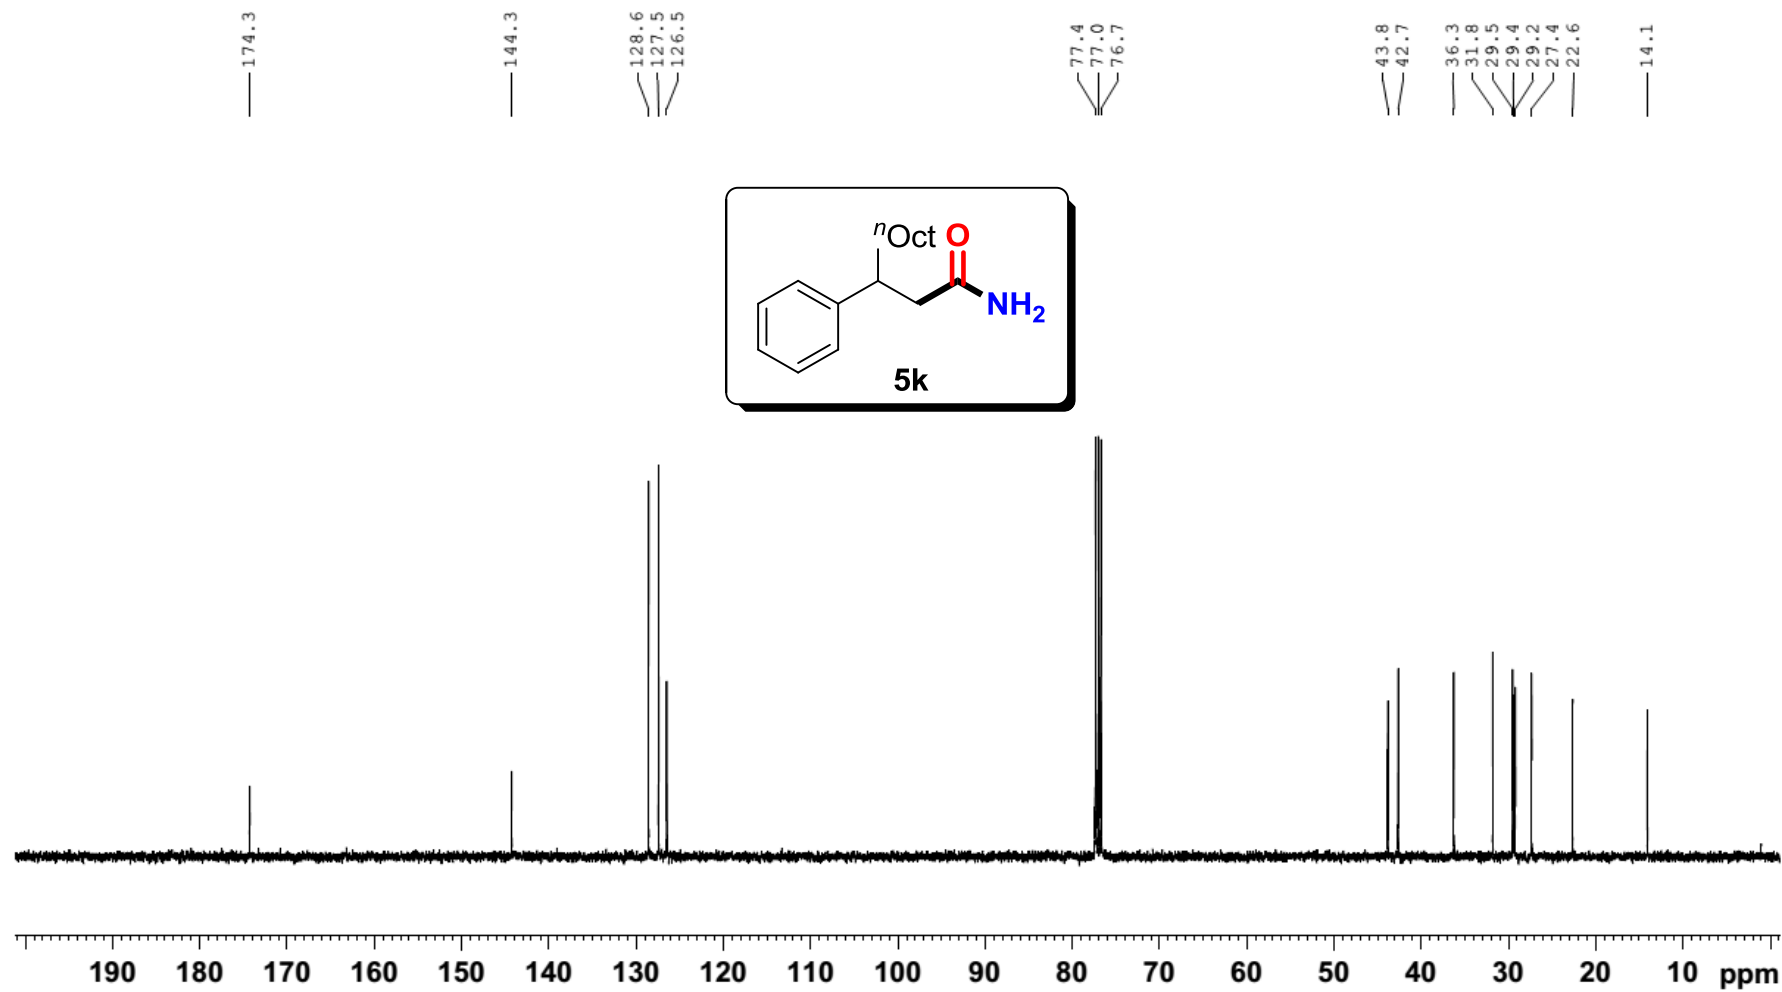

ZGY-X160111-4-HNMR

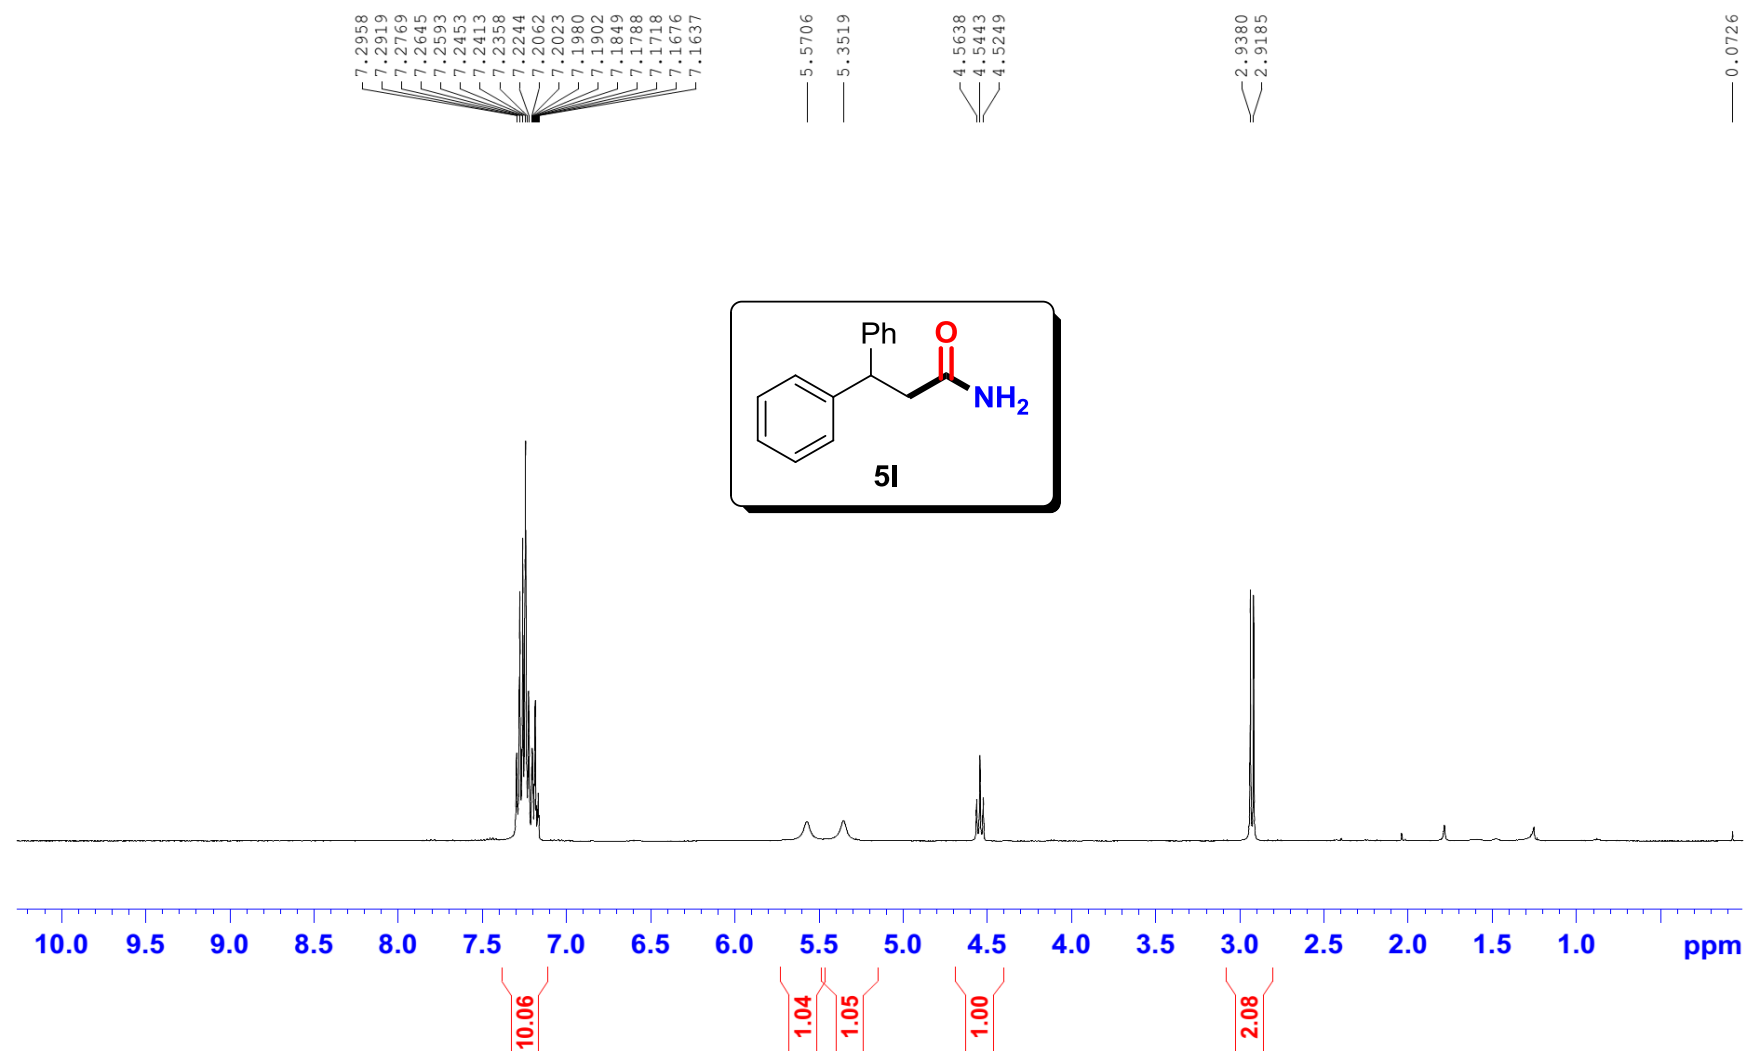



ZGY-X15X02-4-CNMR

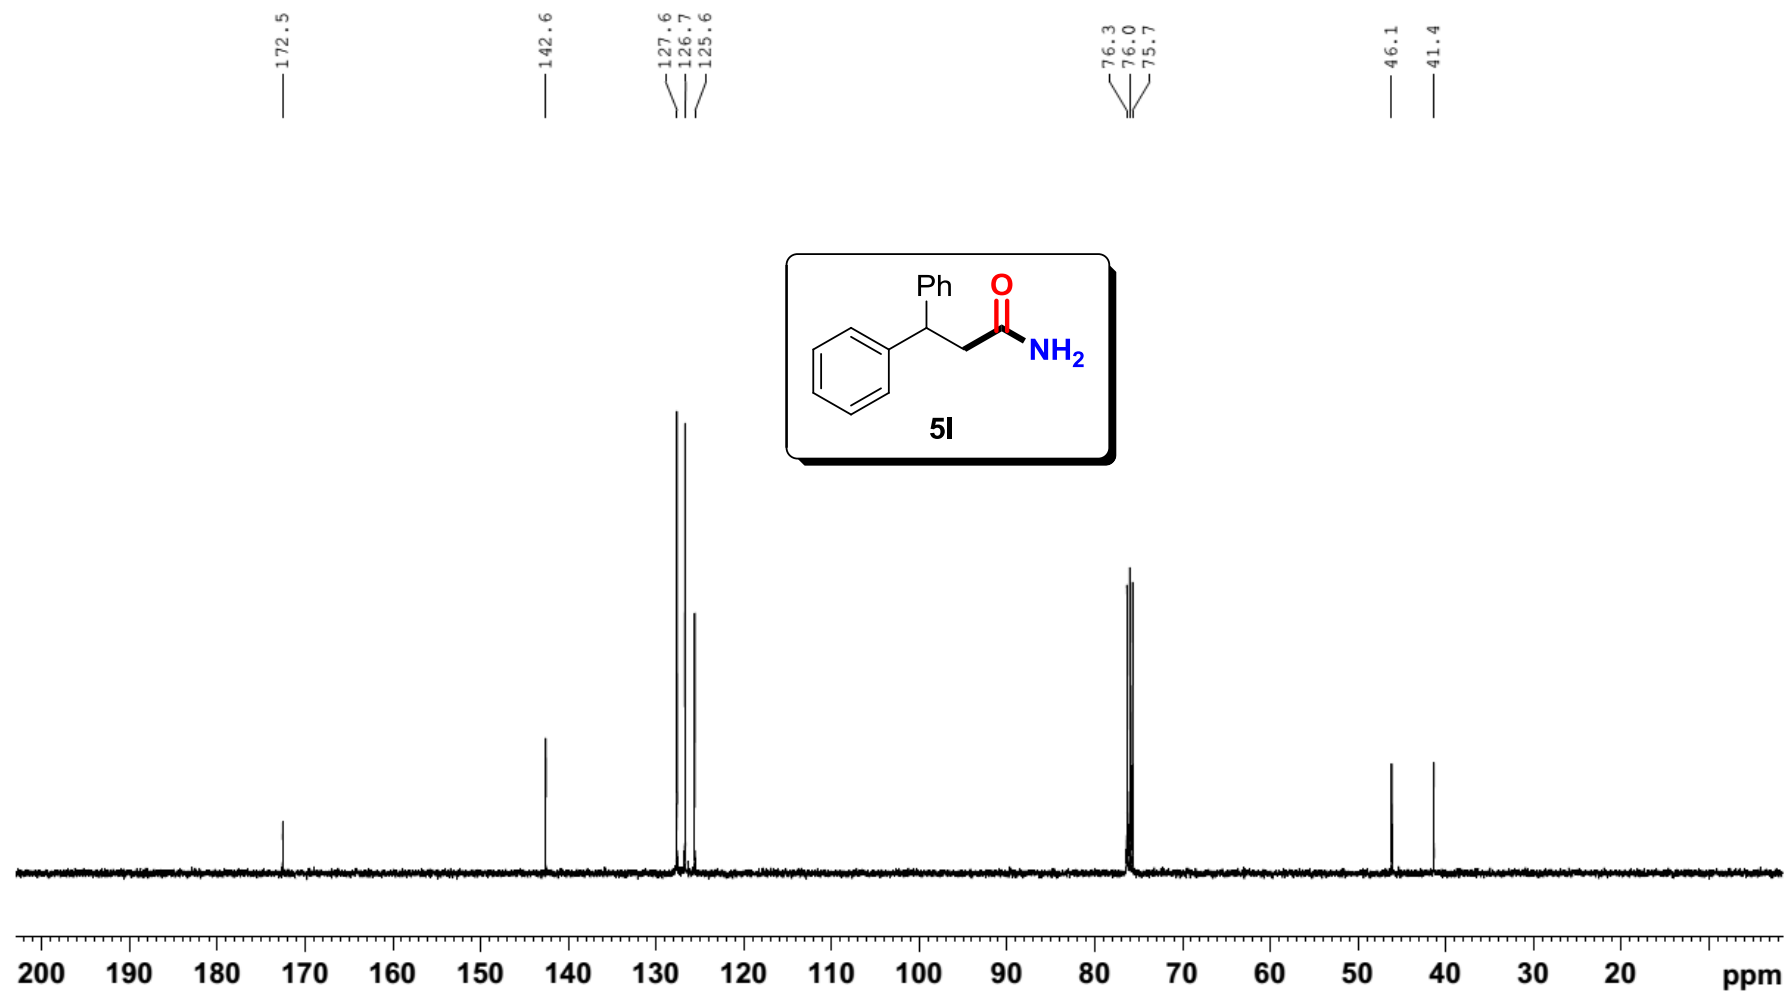

ZCY-X150928-1-HNMR

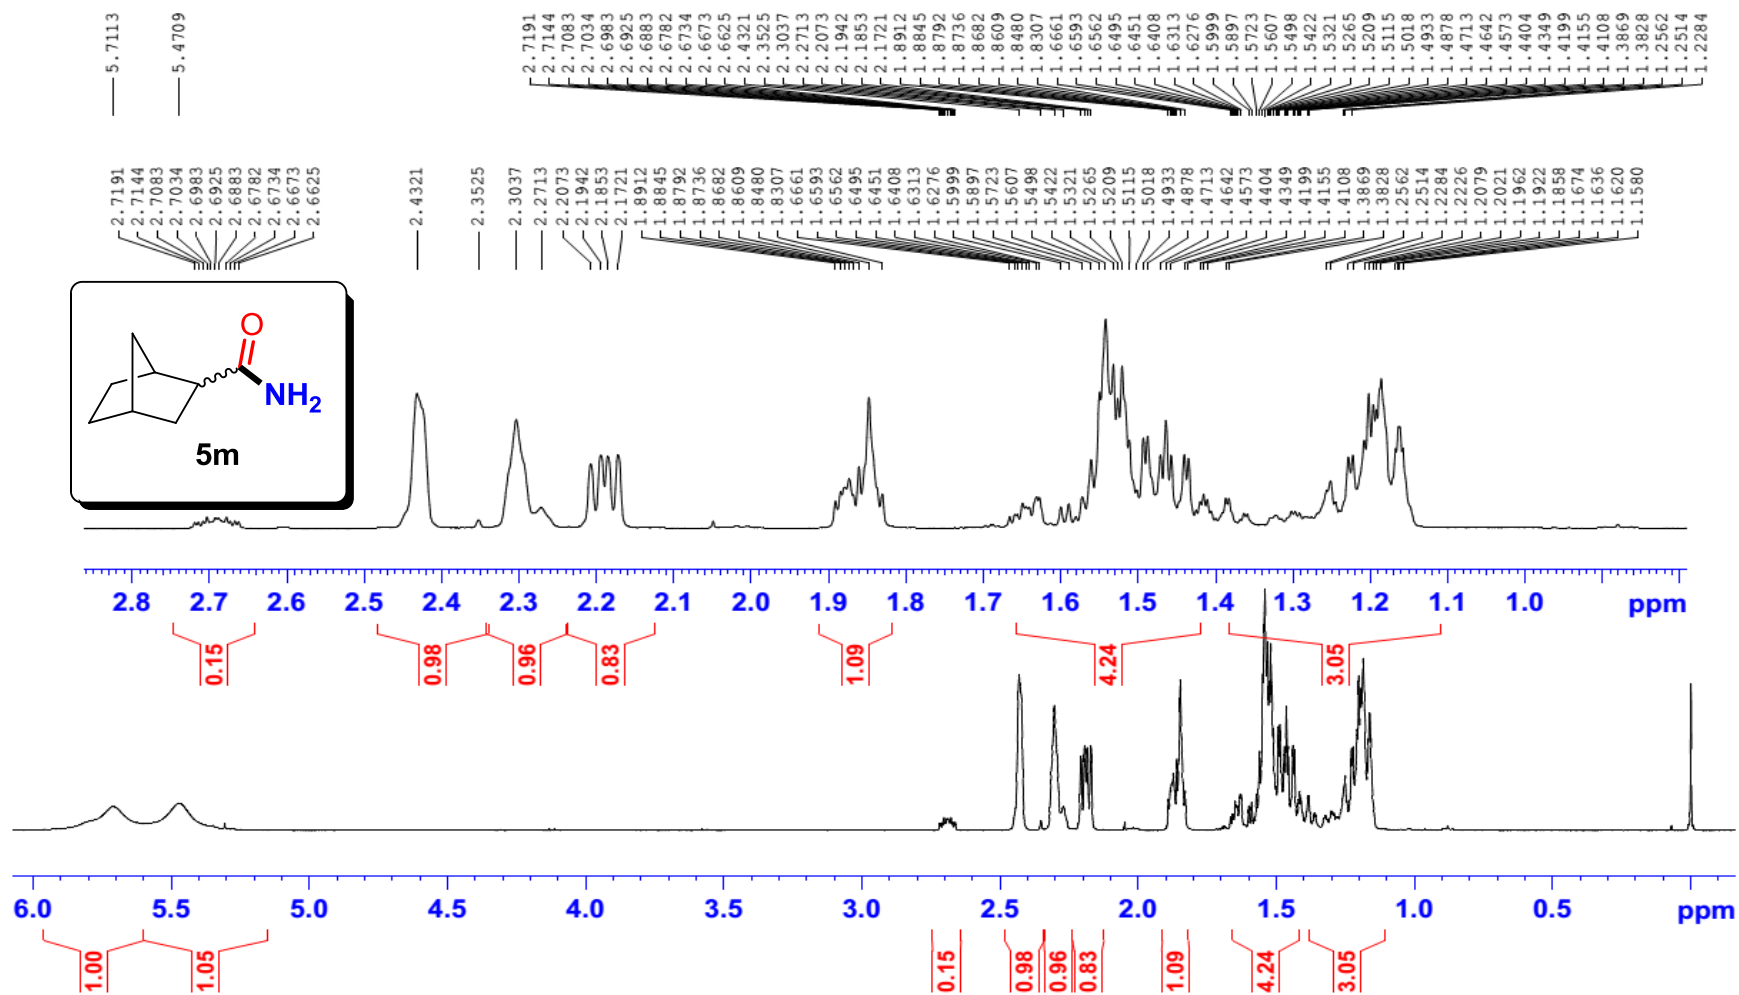

ZCY-X150928-1-CNMR

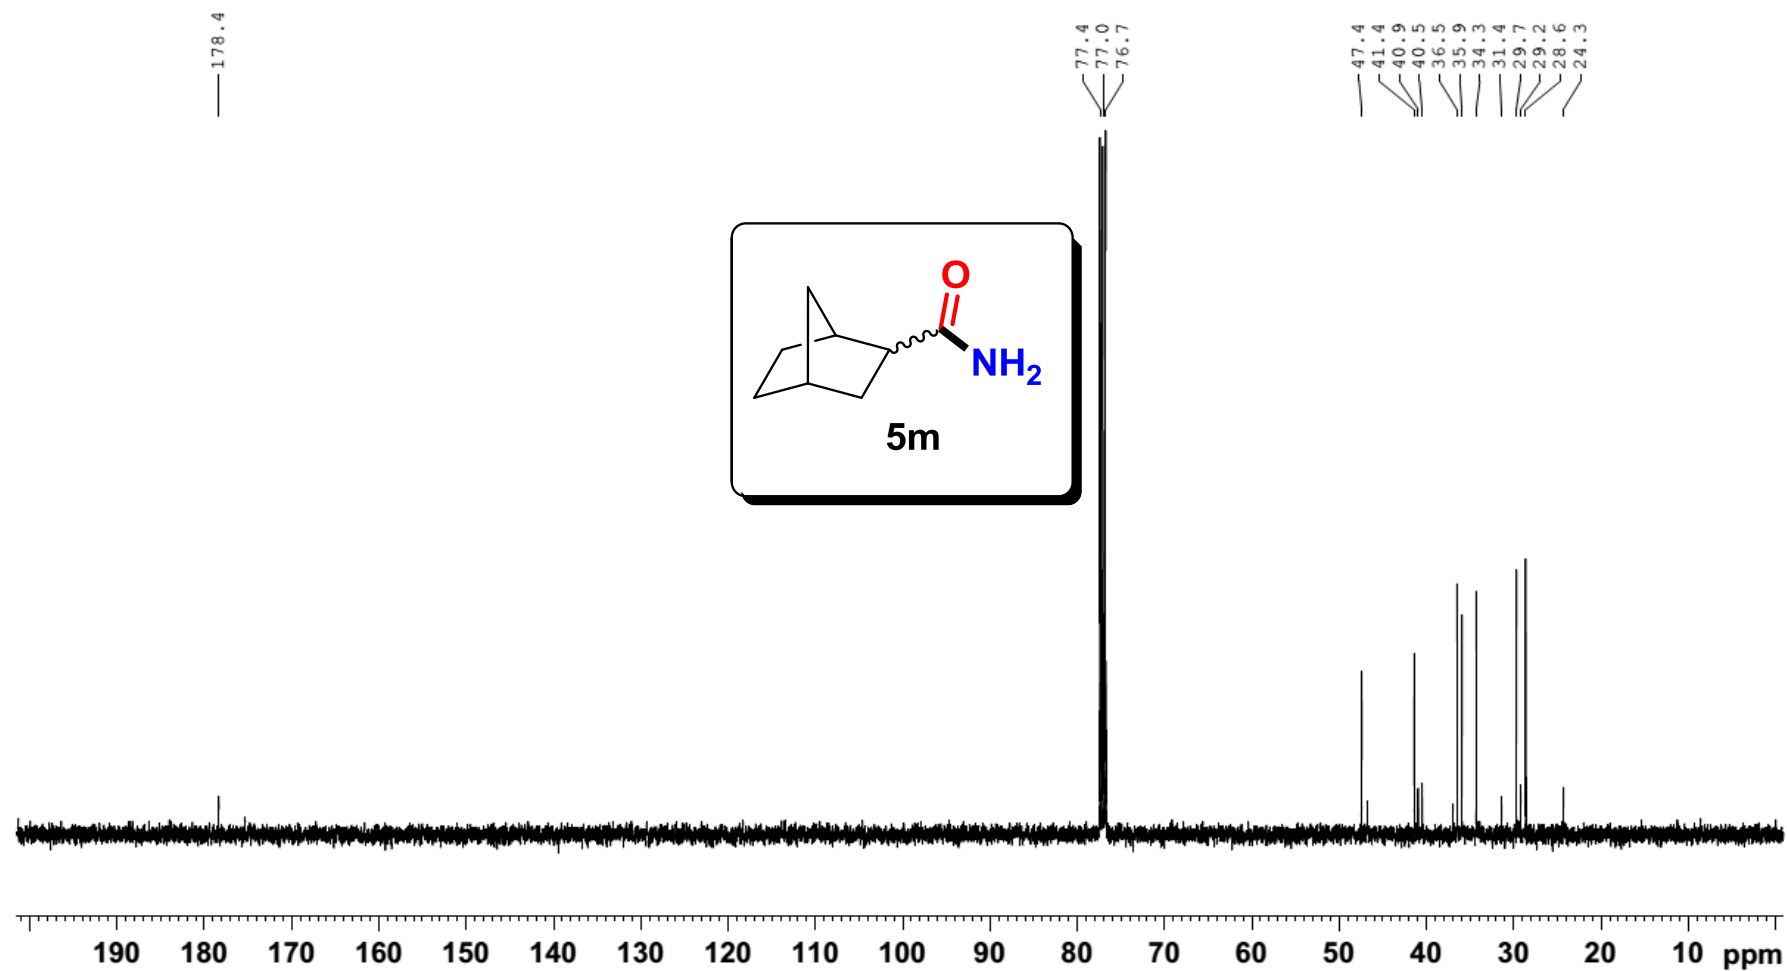

ZGY-X15Y24-1-HNMR

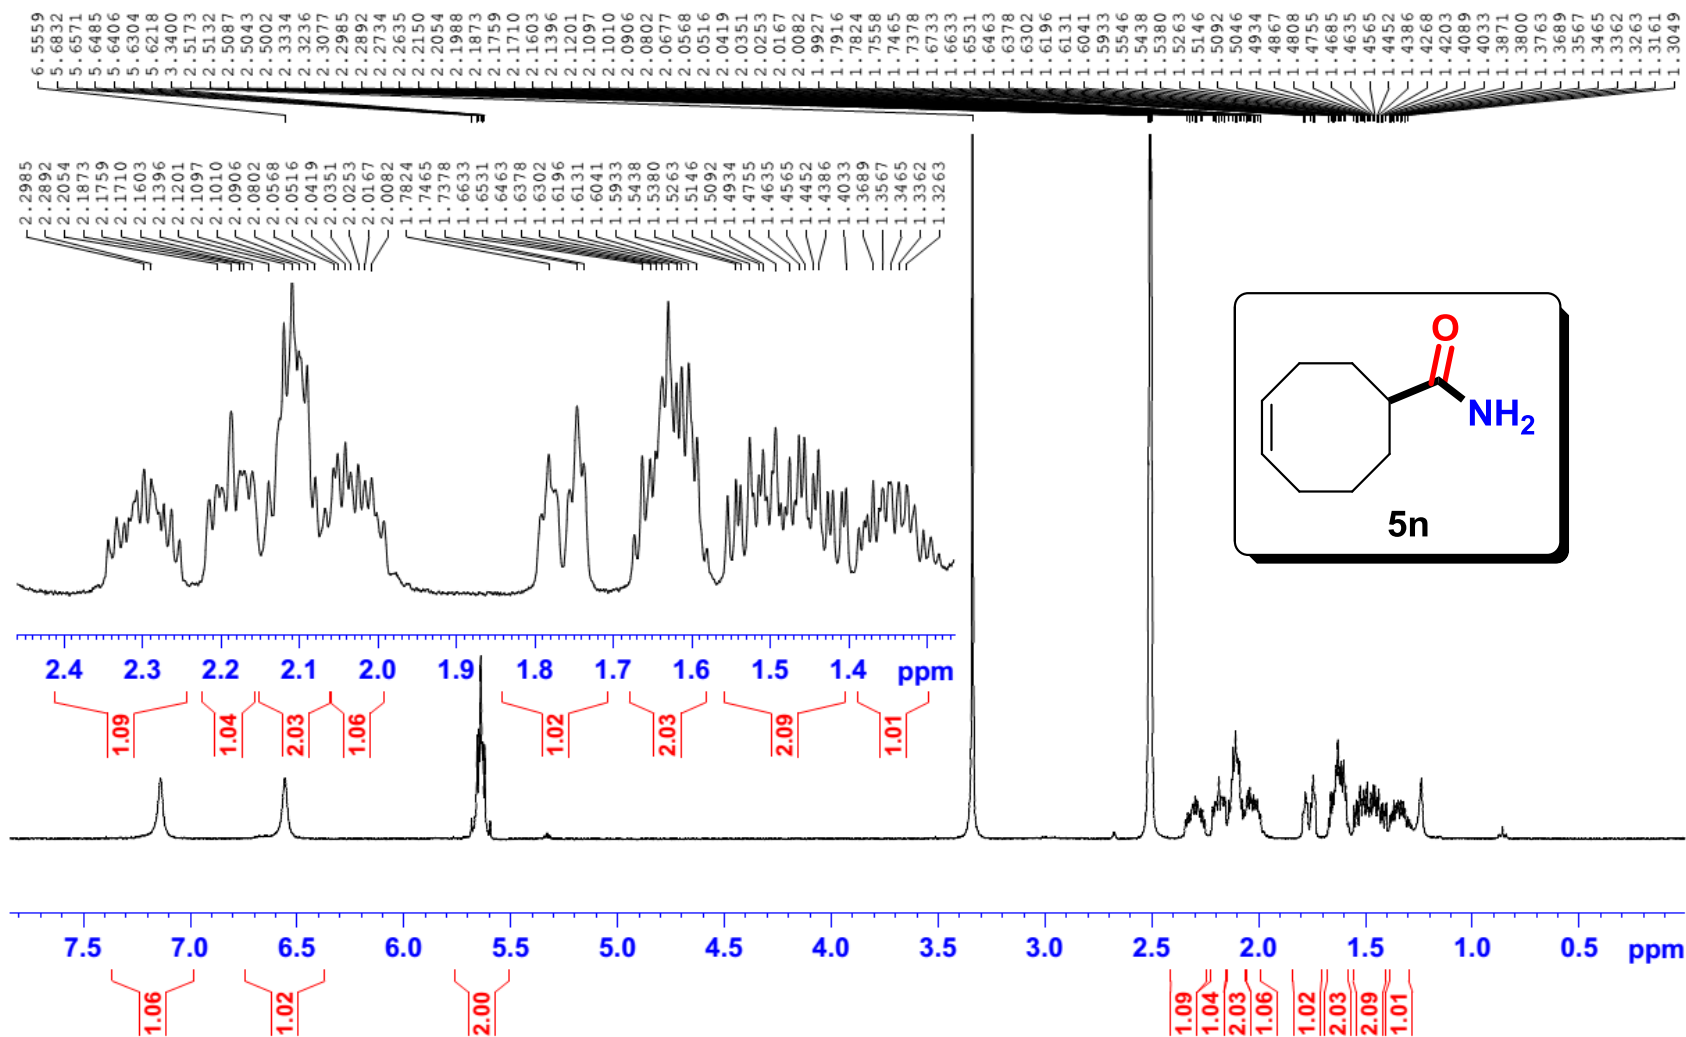

ZGY-X15Y25-1-CNMR

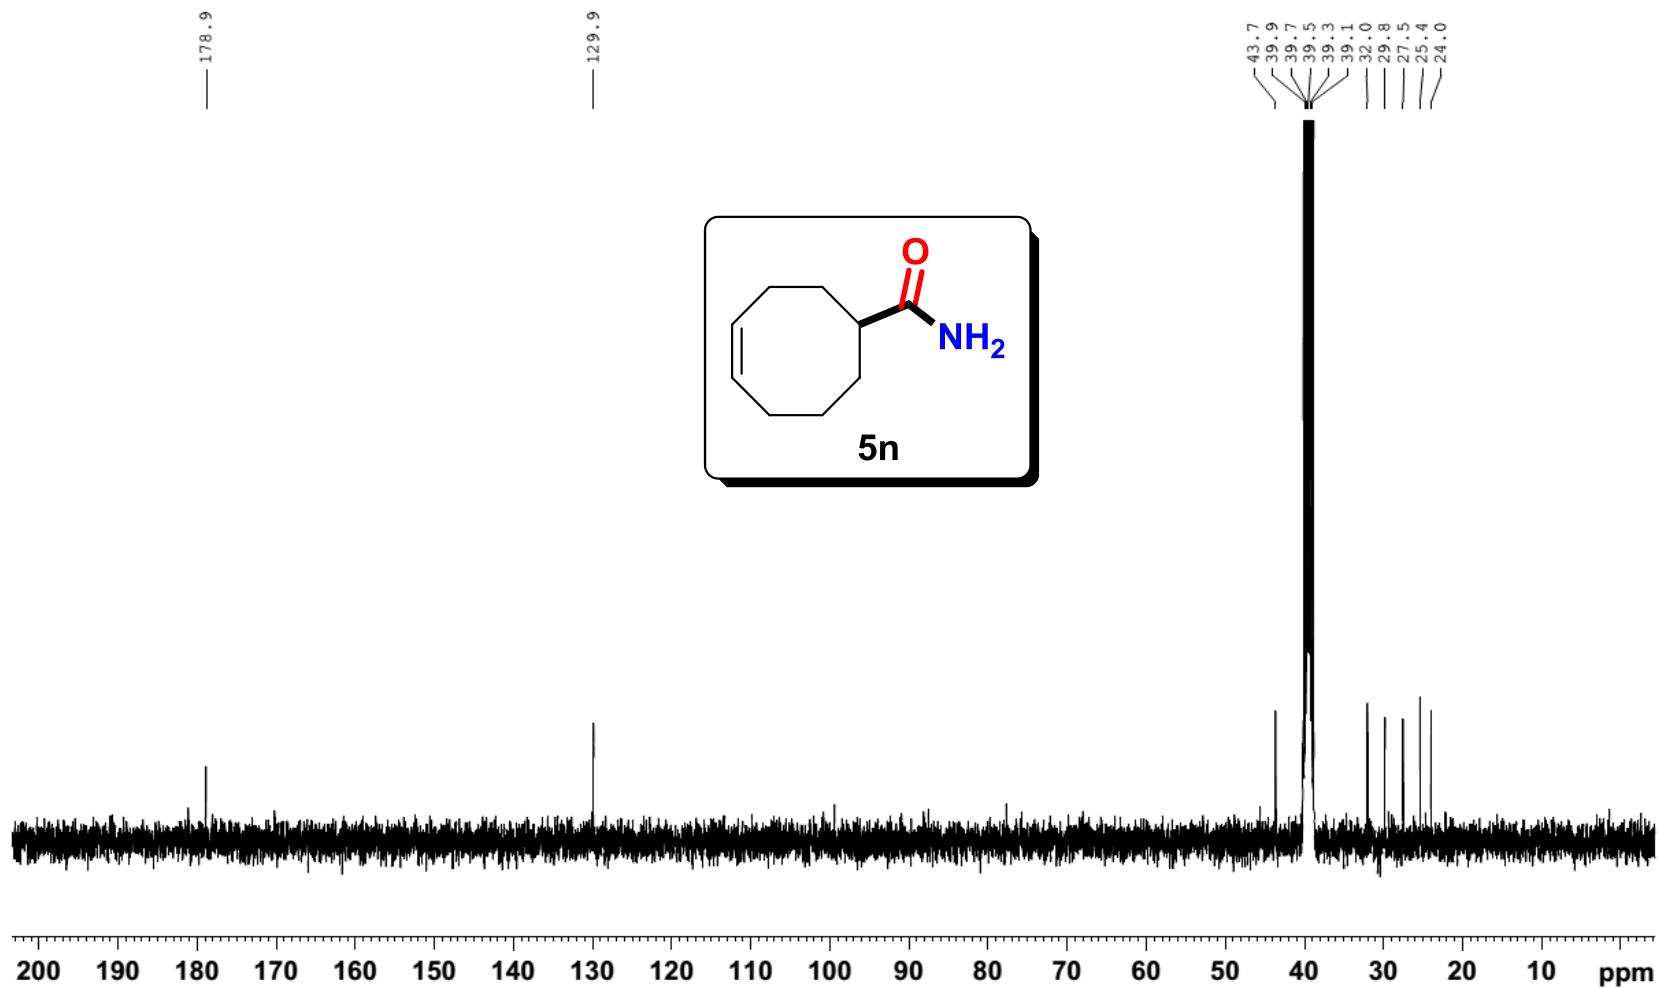

ZJP-X15Z28-2-HNMR

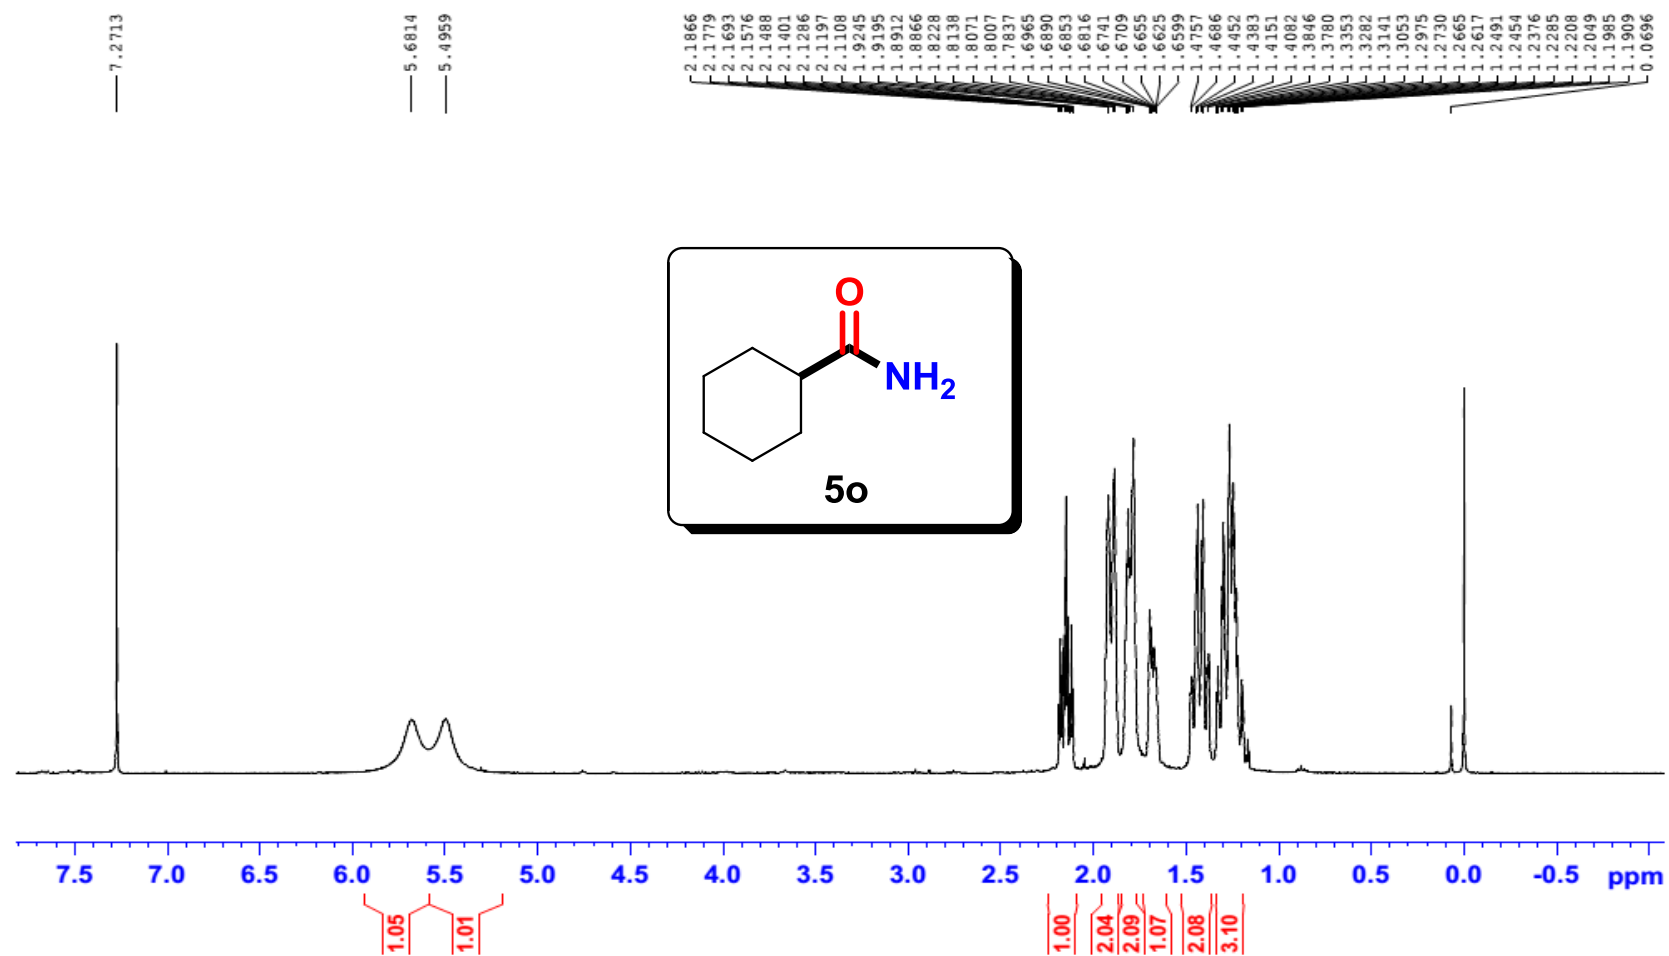

ZGY-X15Y09-5-CNMR

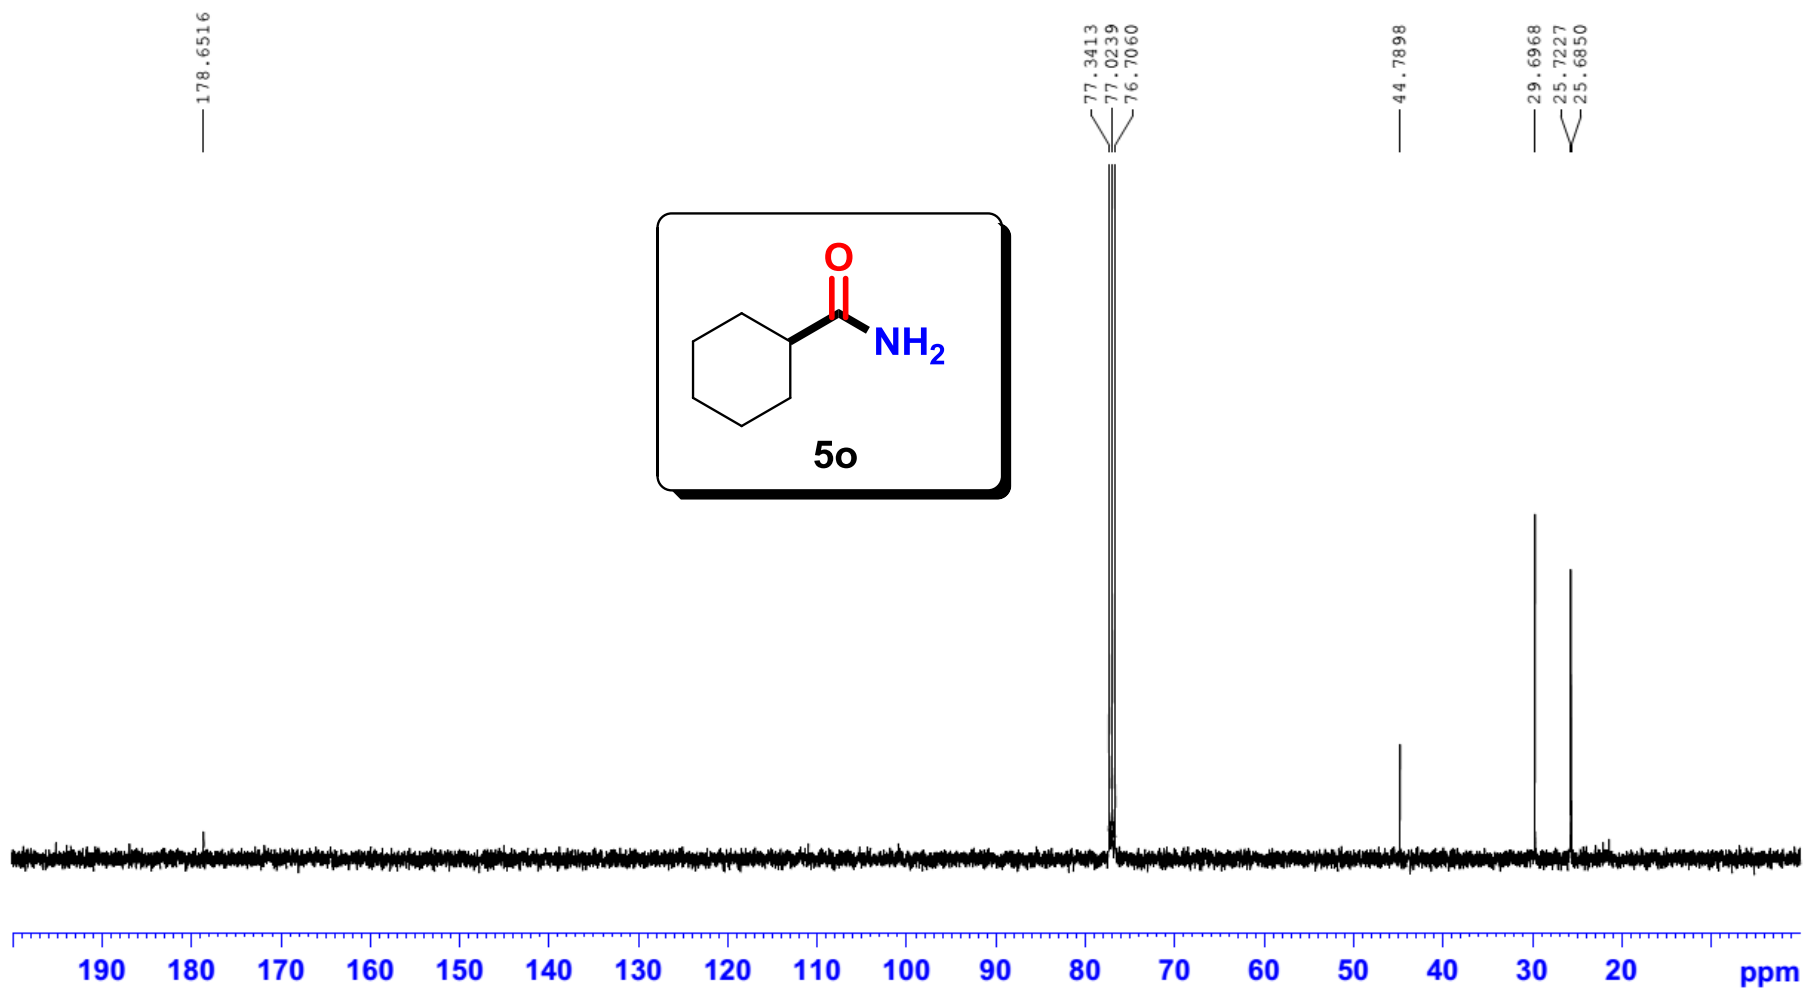

GB-X170223-1-7-HNMR

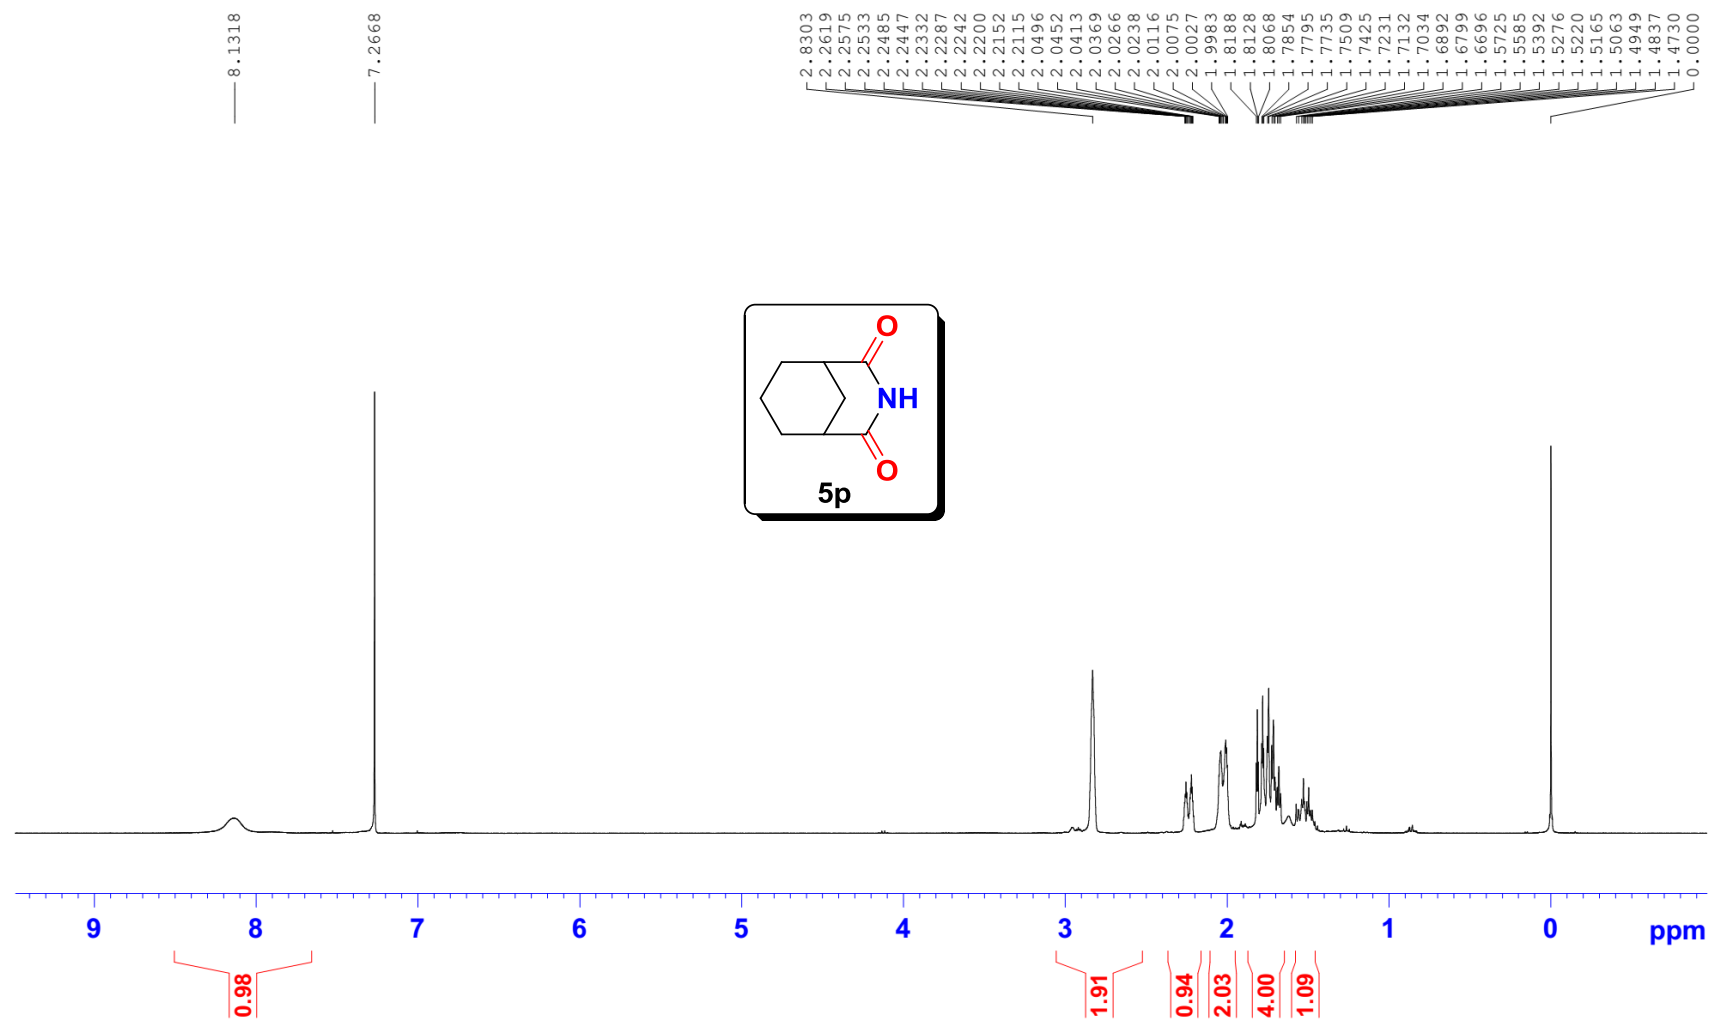



GB-X170223-1-7-CNMR

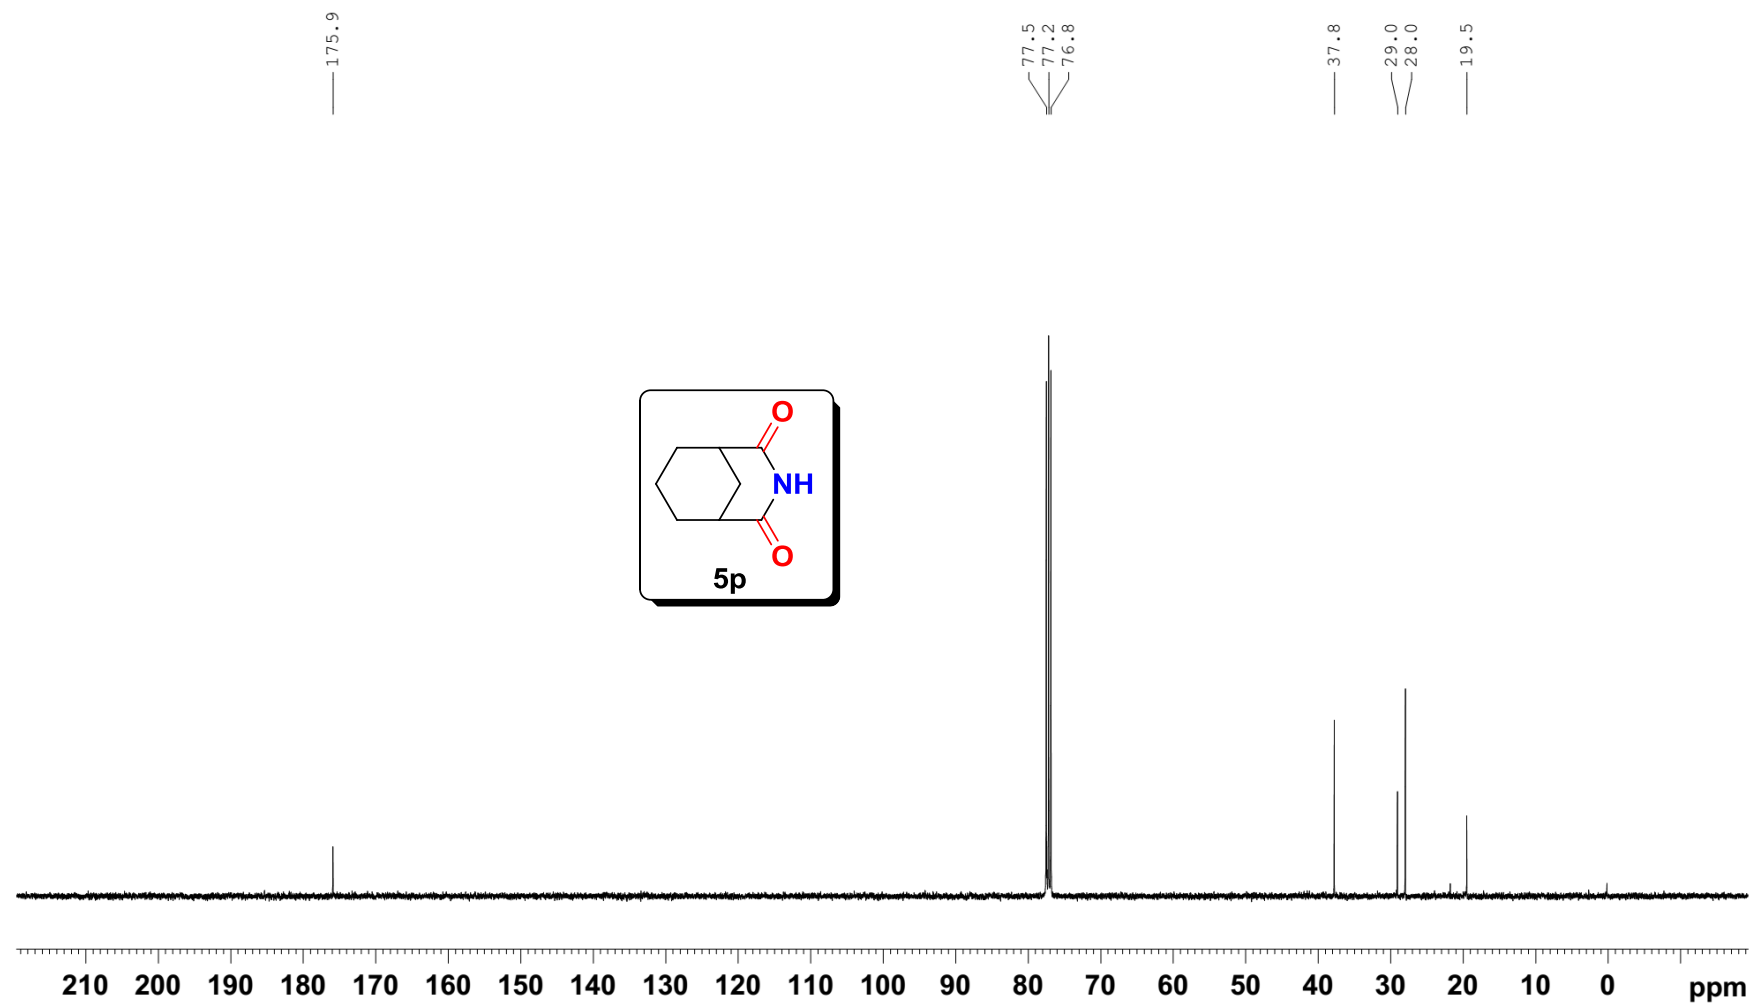

ZGY-X15X03-2-HNMR

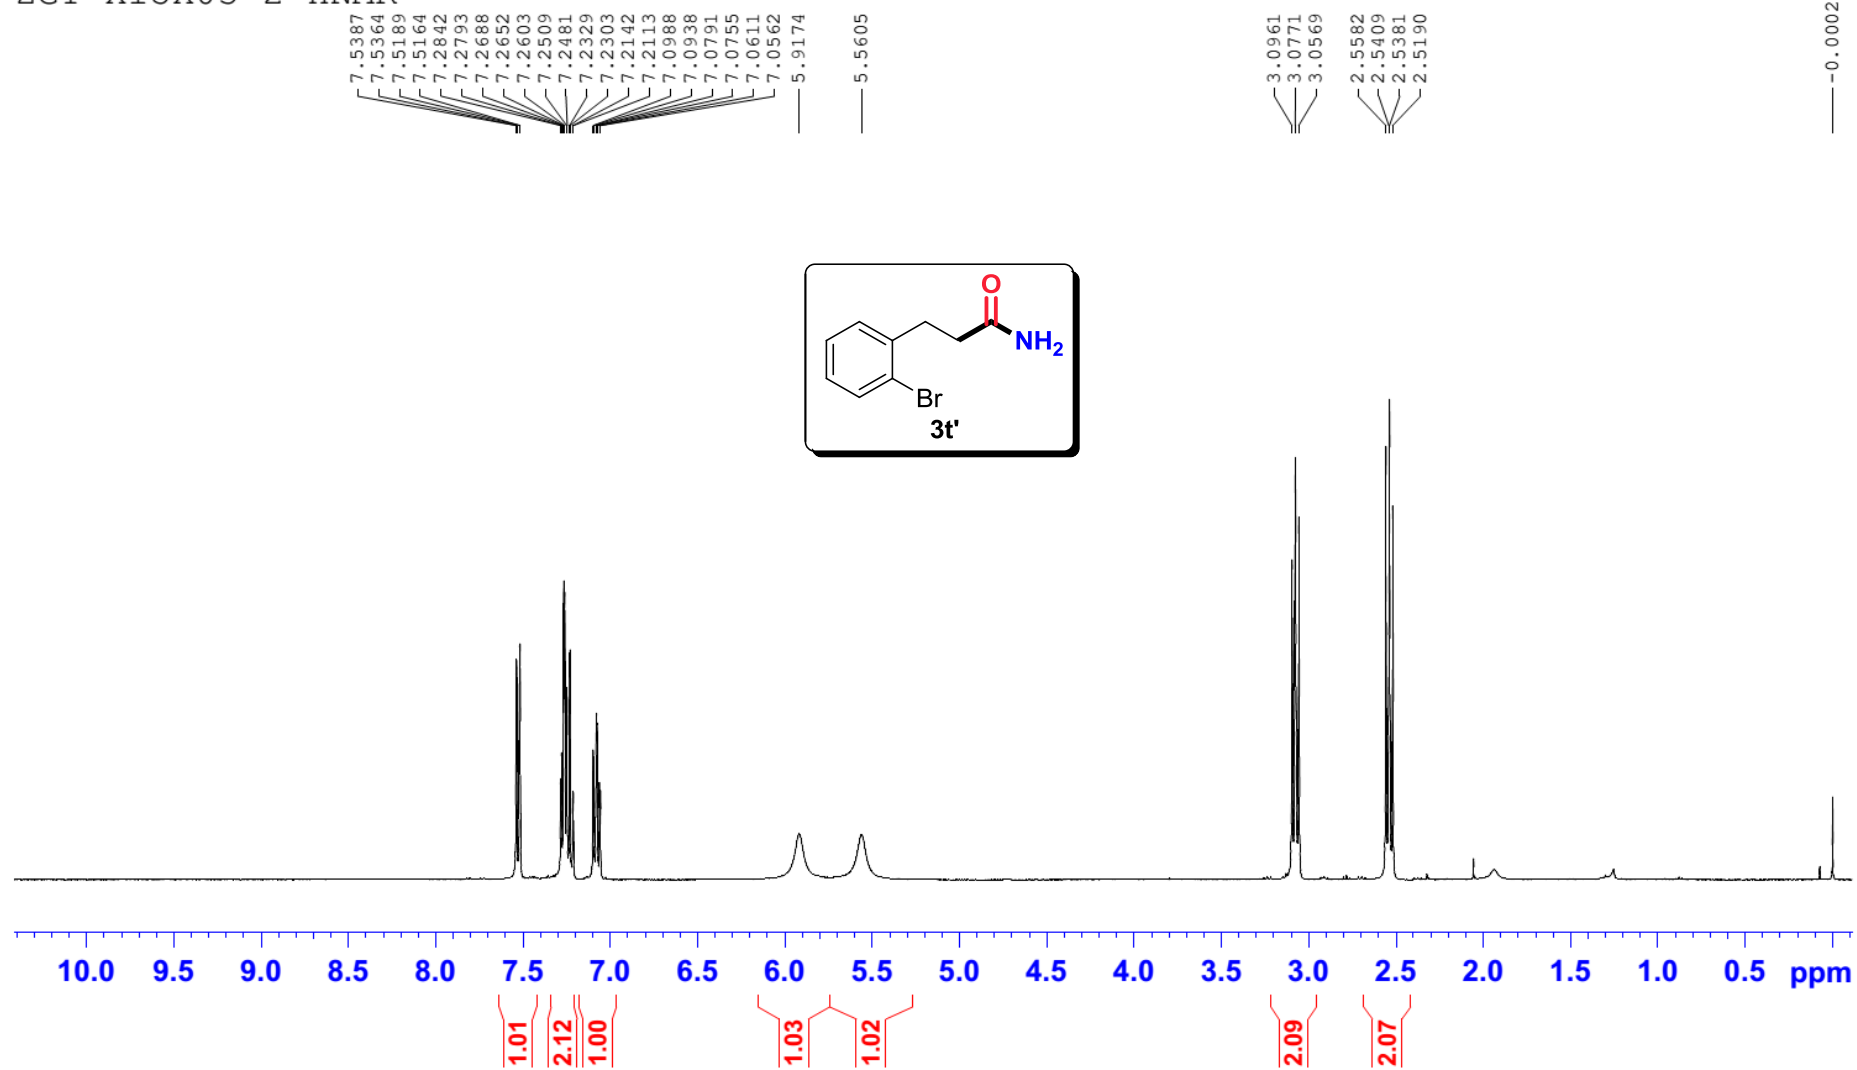

ZGY-X15X03-2-CNMR

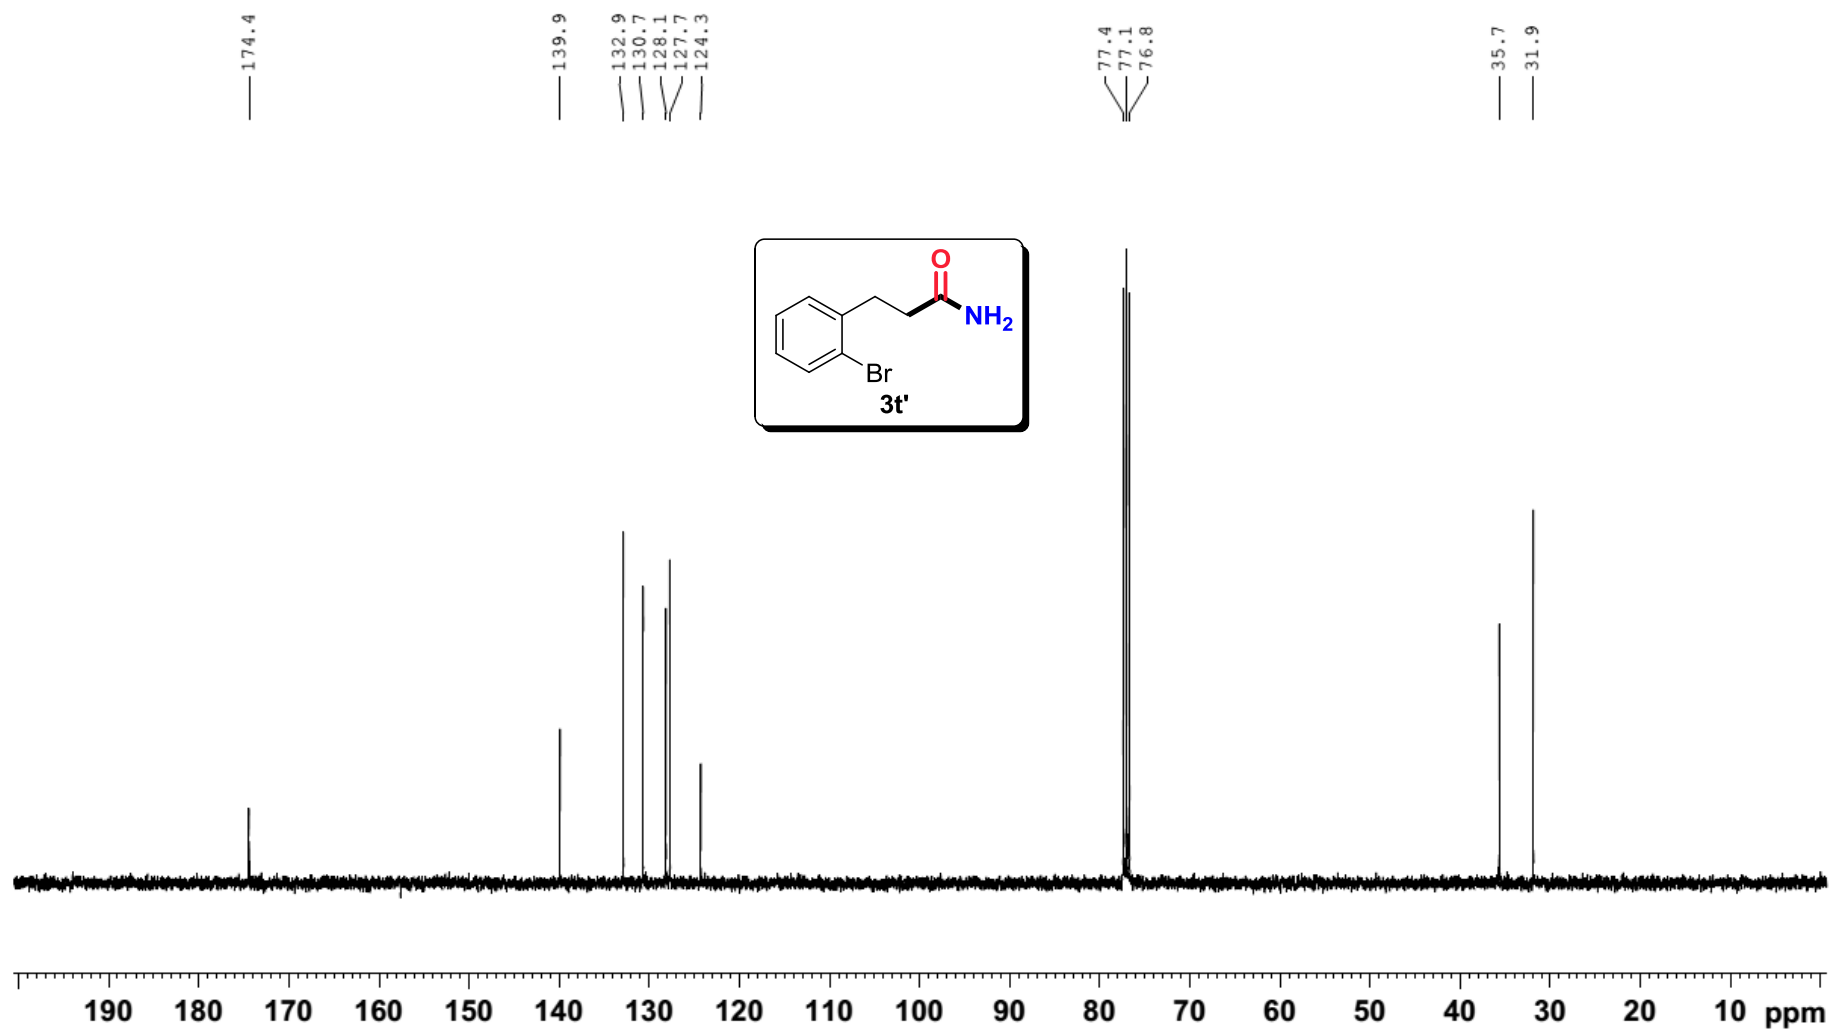

ZGY-X15Y16-4-HNMR

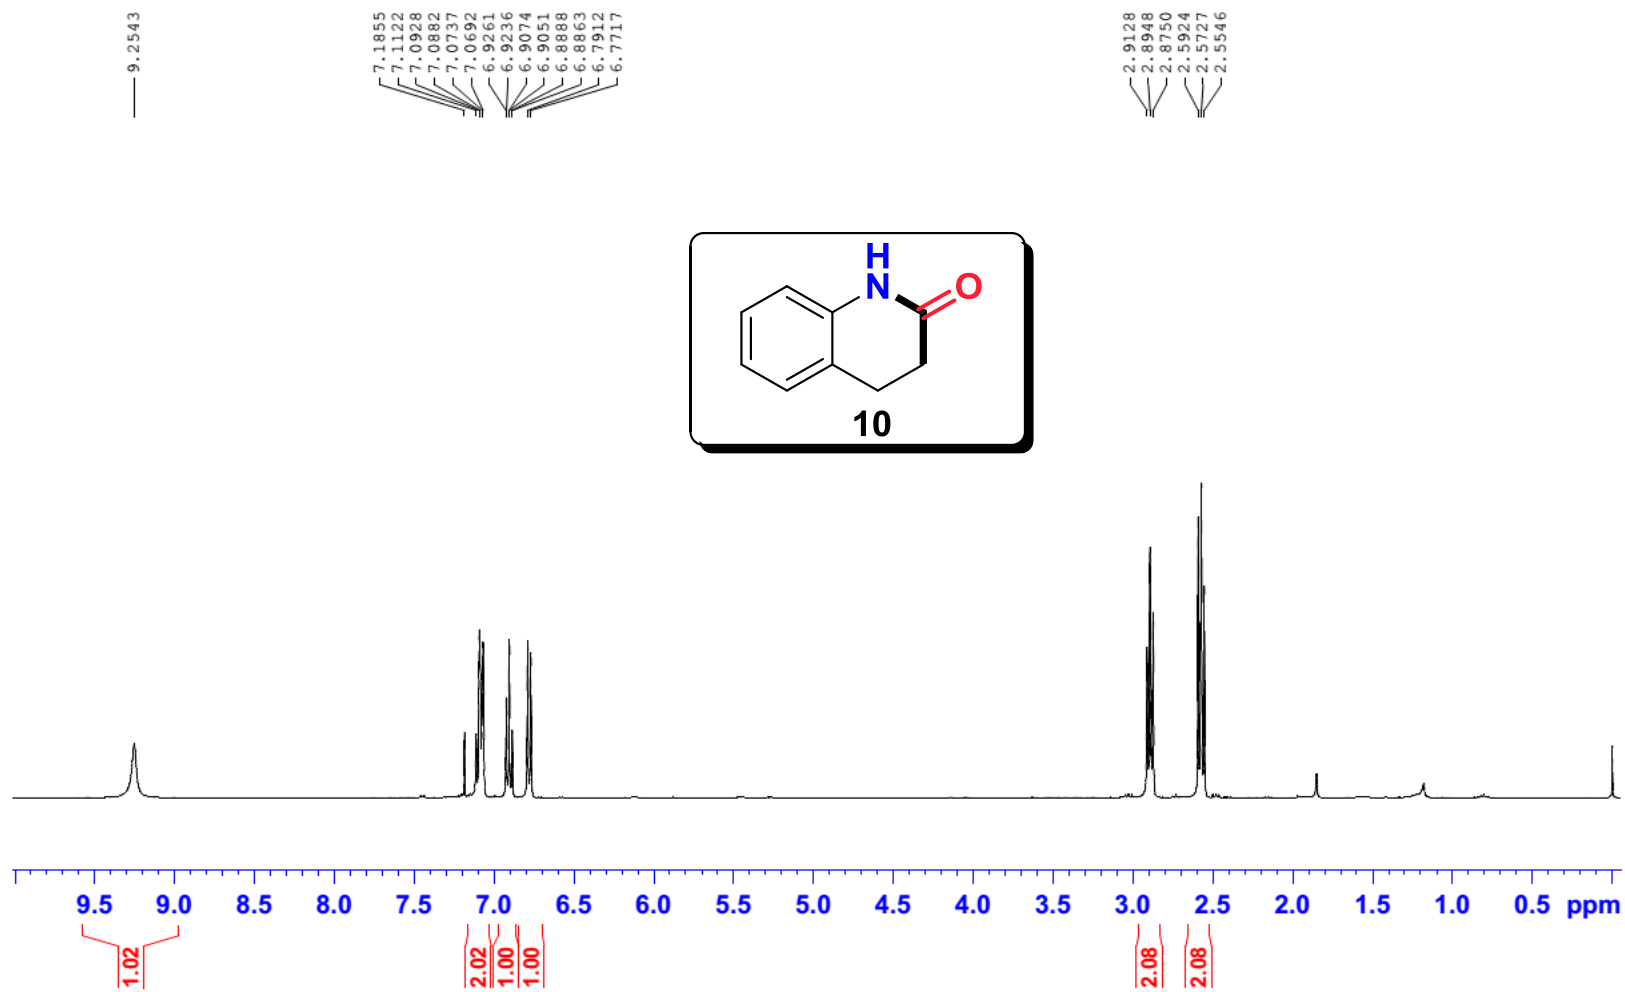

ZGY-X15Y16-4-CNMR

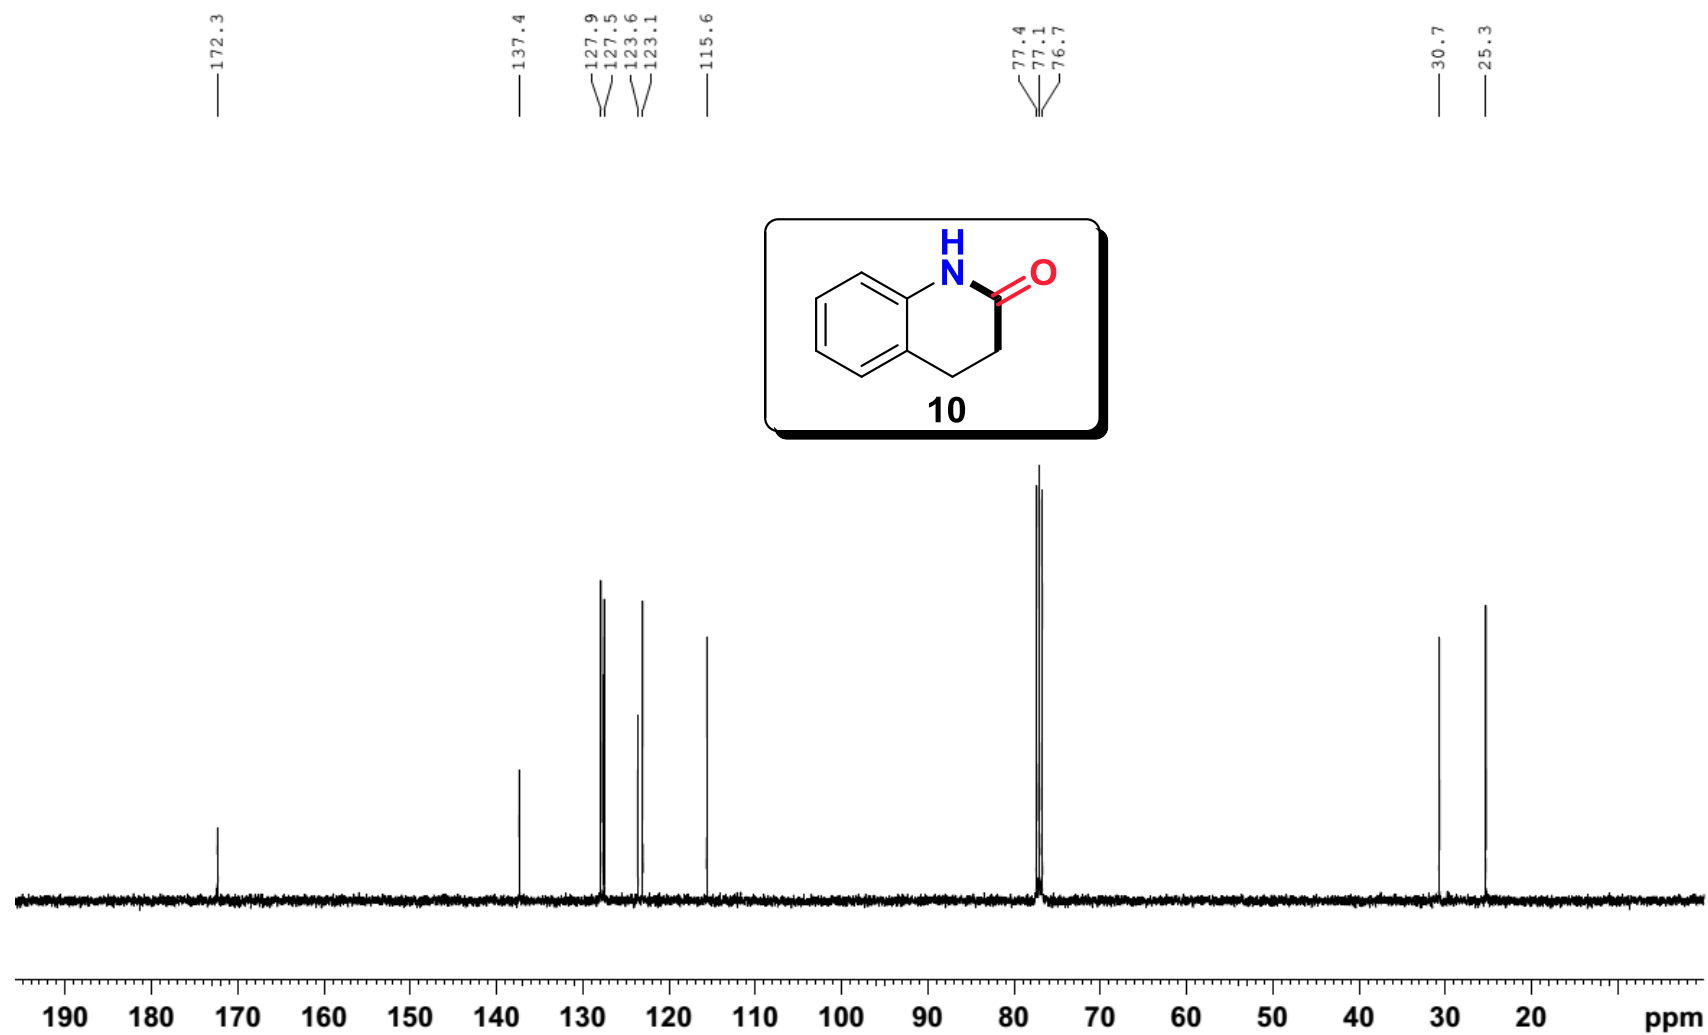

ZGY-X15X26-3-HNMR

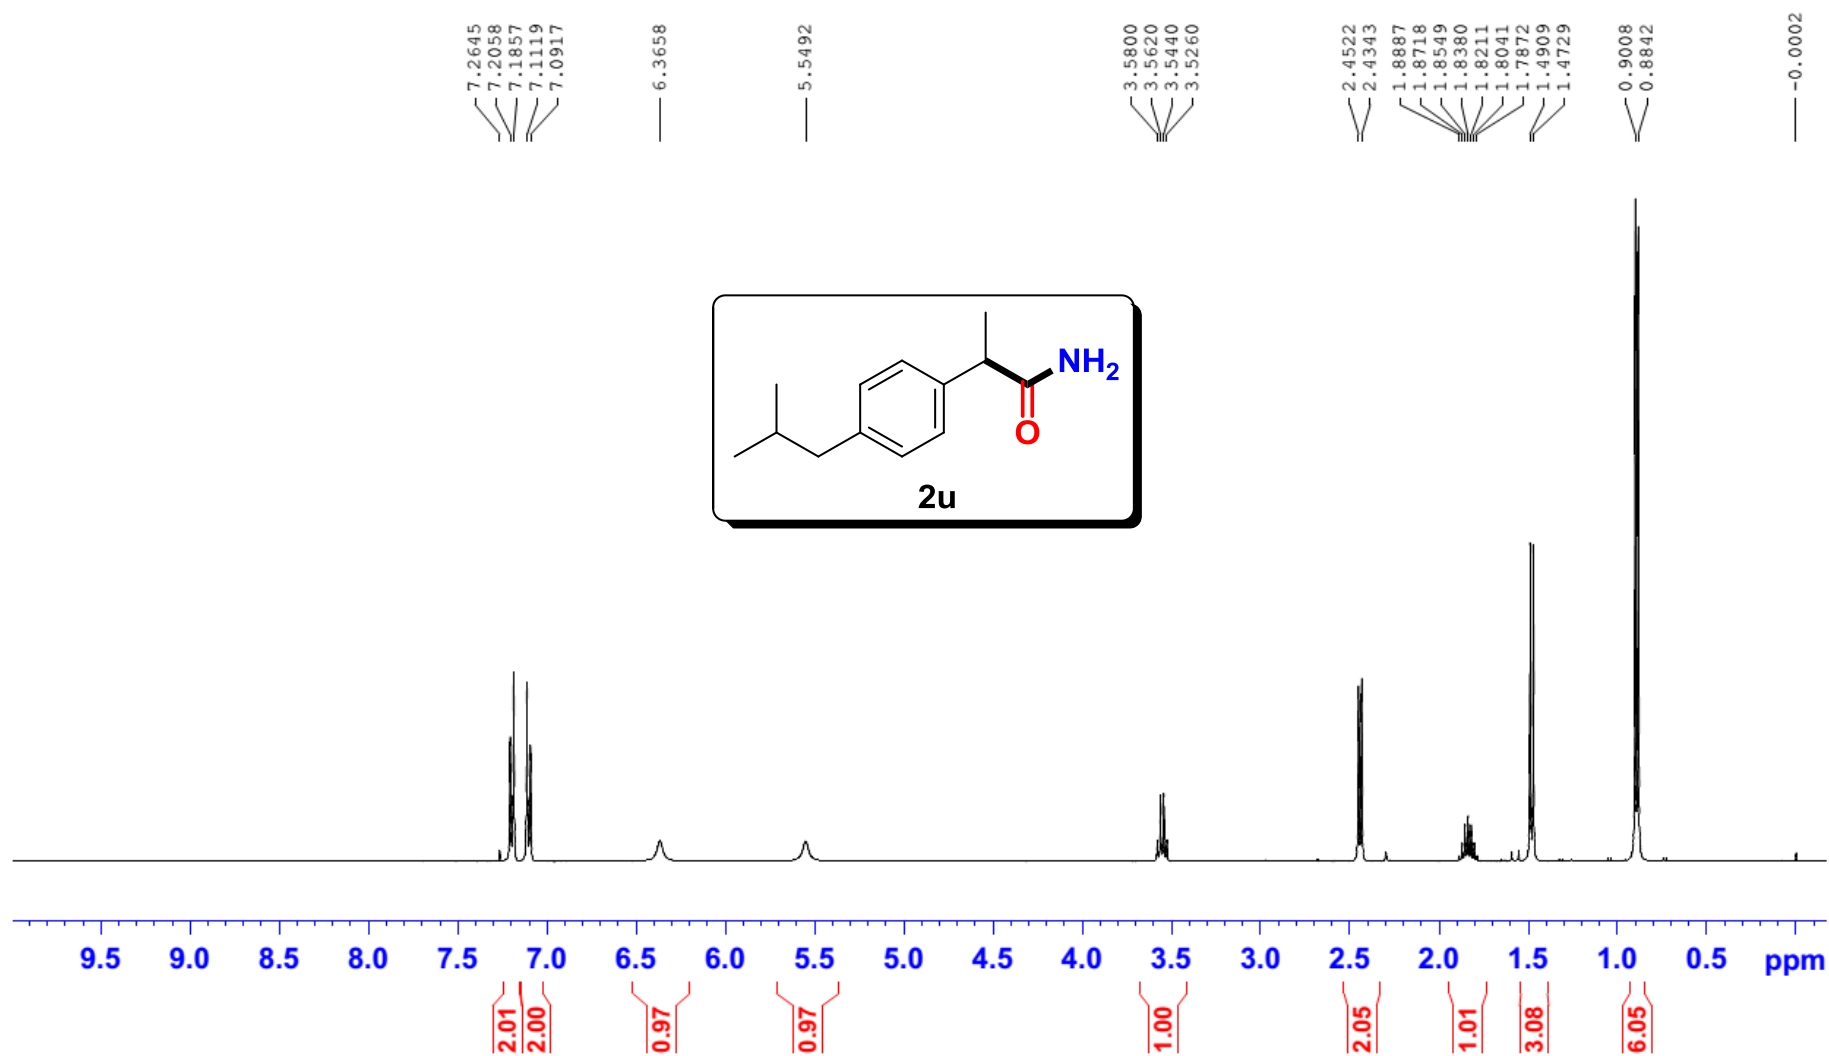

ZGY-X15X26-3-CNMR

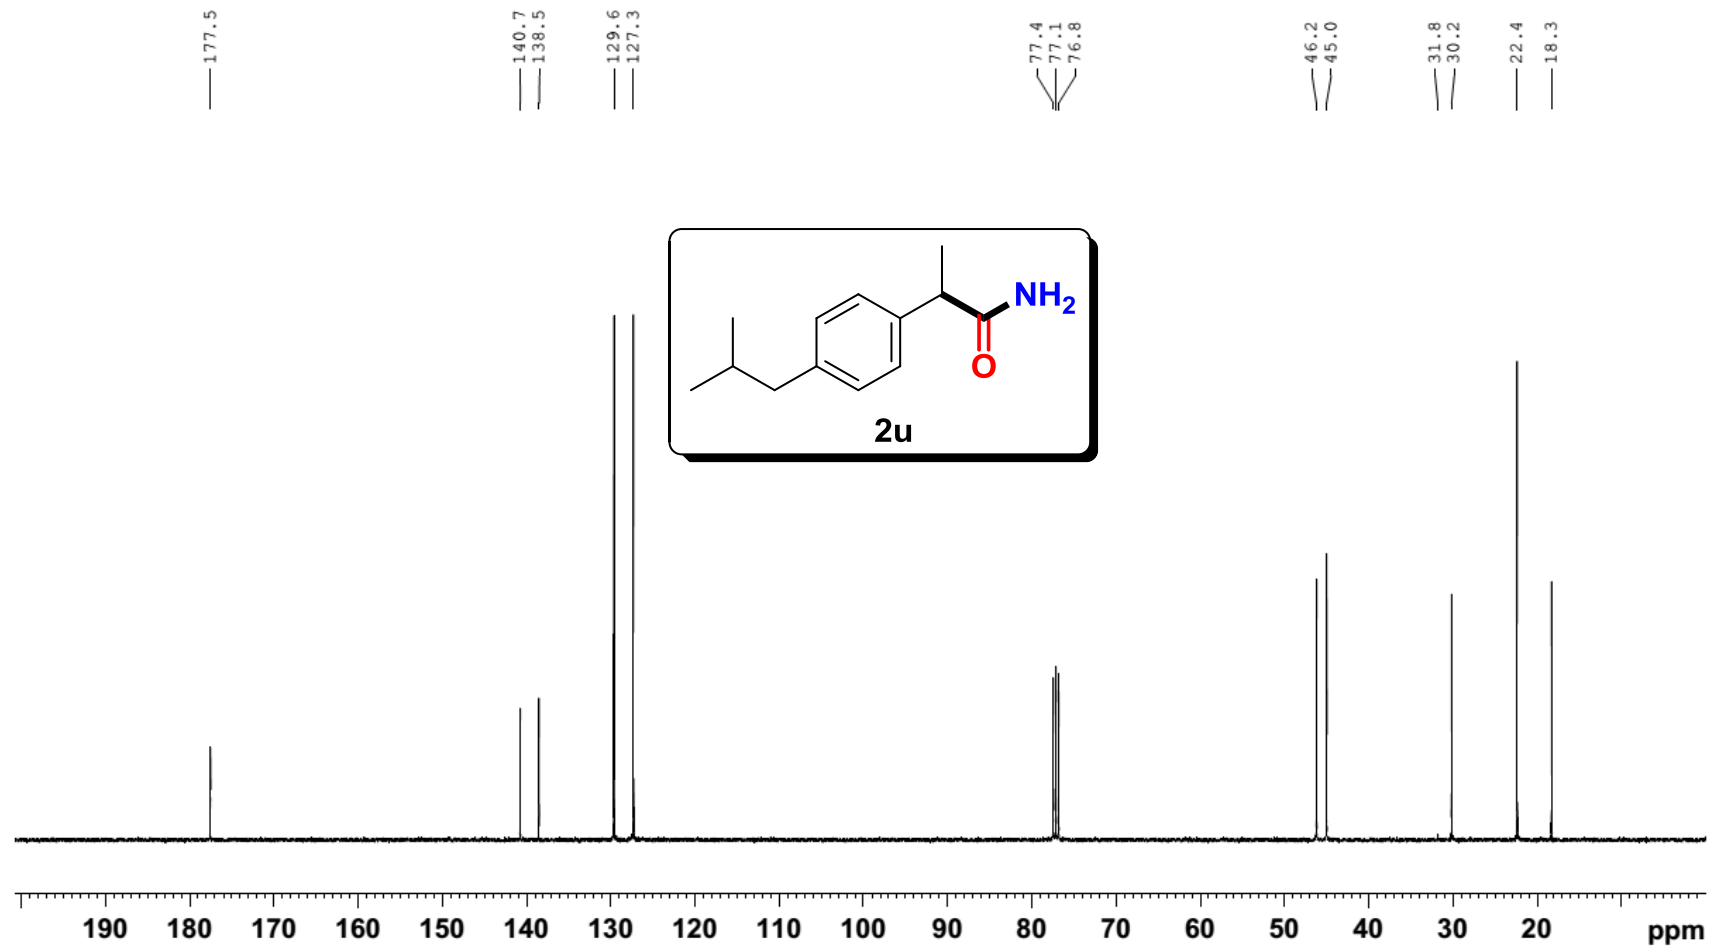

ZGY-X15X27-1-HNMR

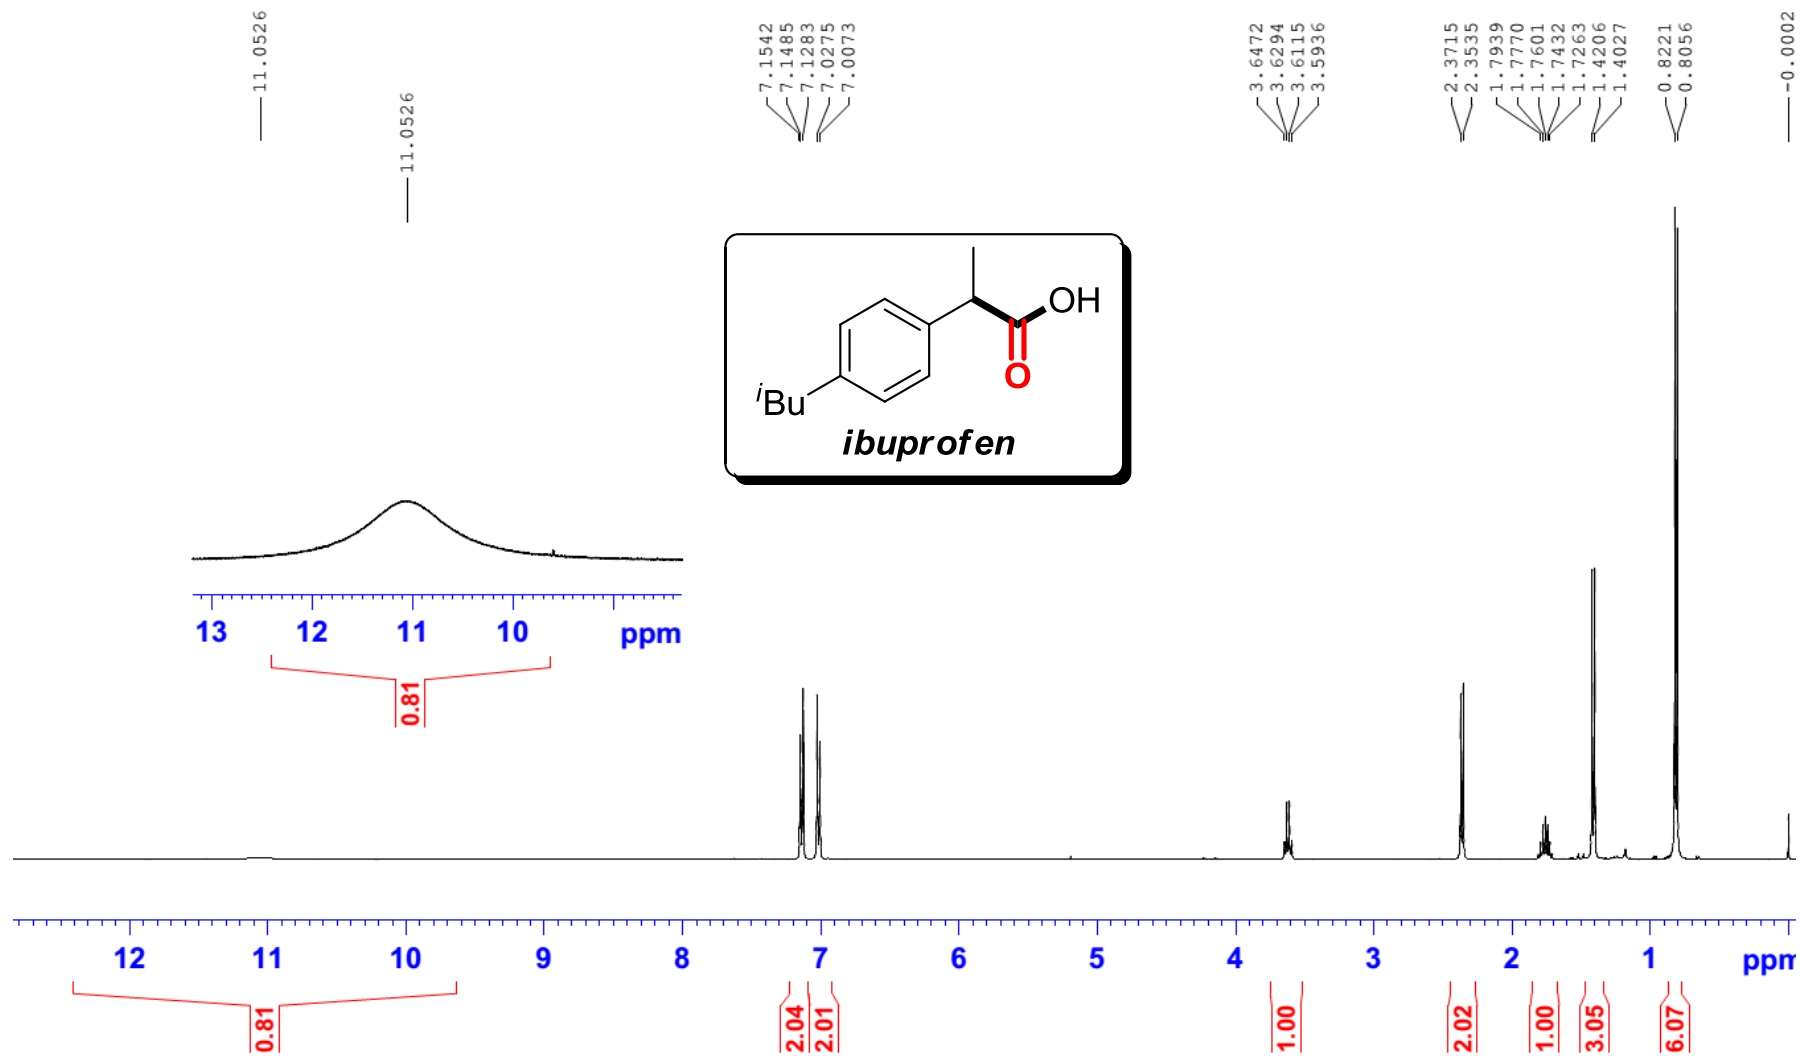



ZGY-X15X27-1-CNMR

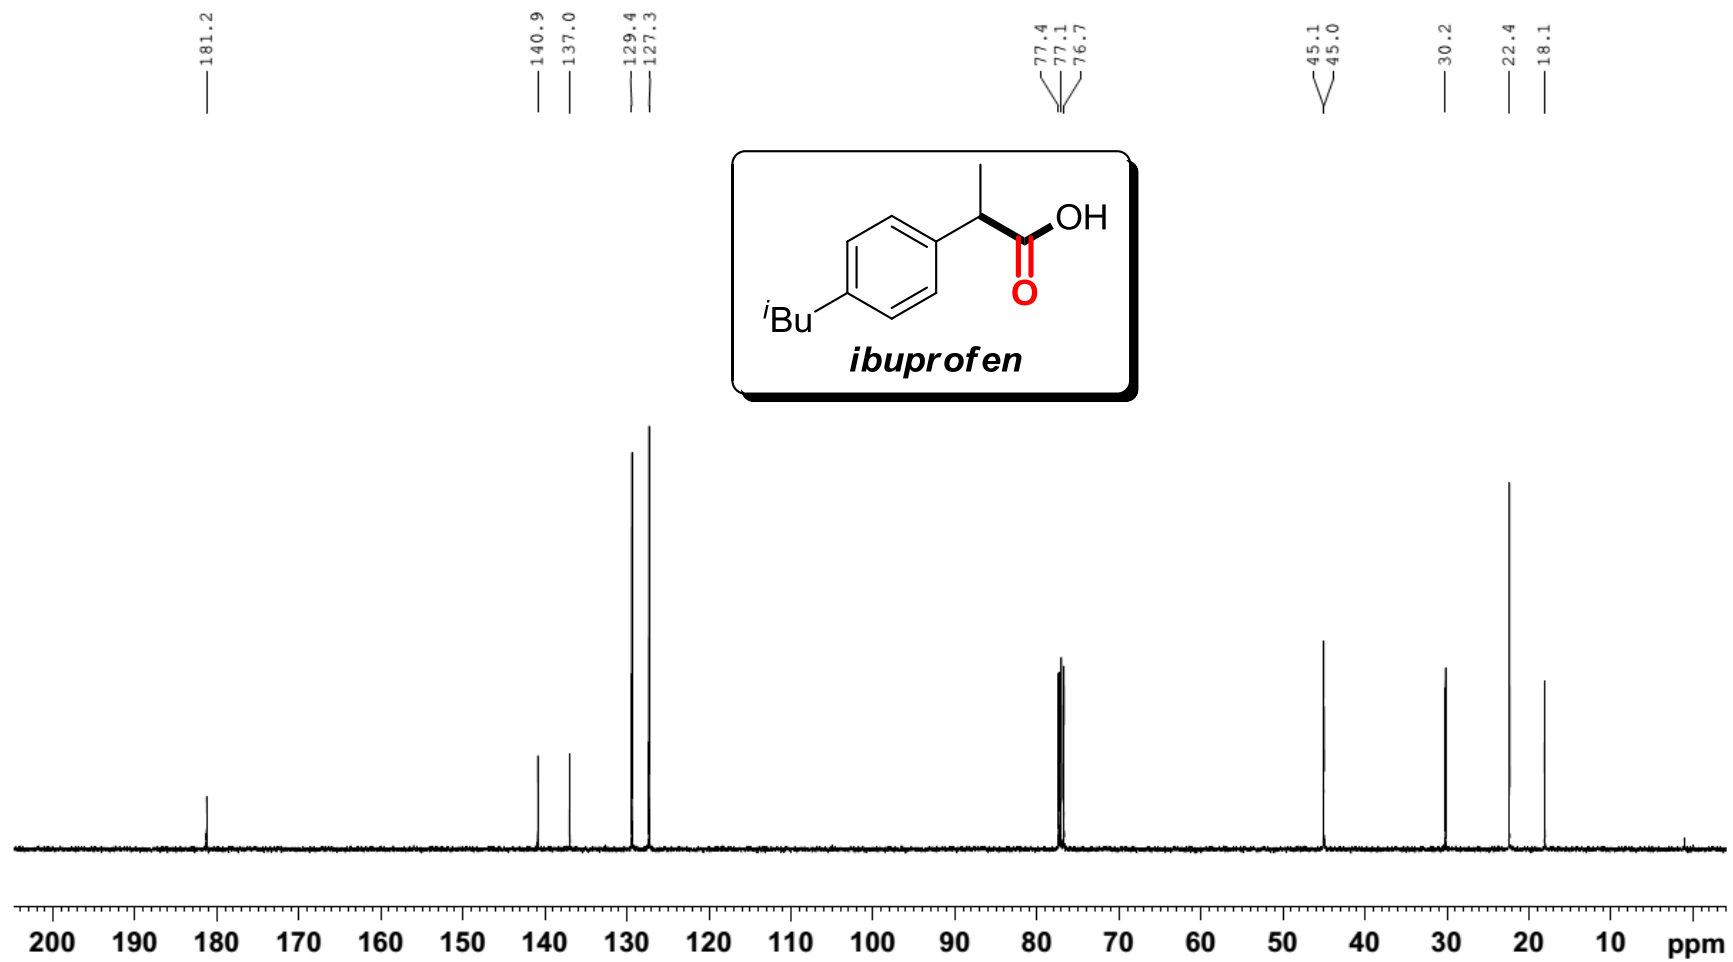

ZGY-X160107-2 H NMR

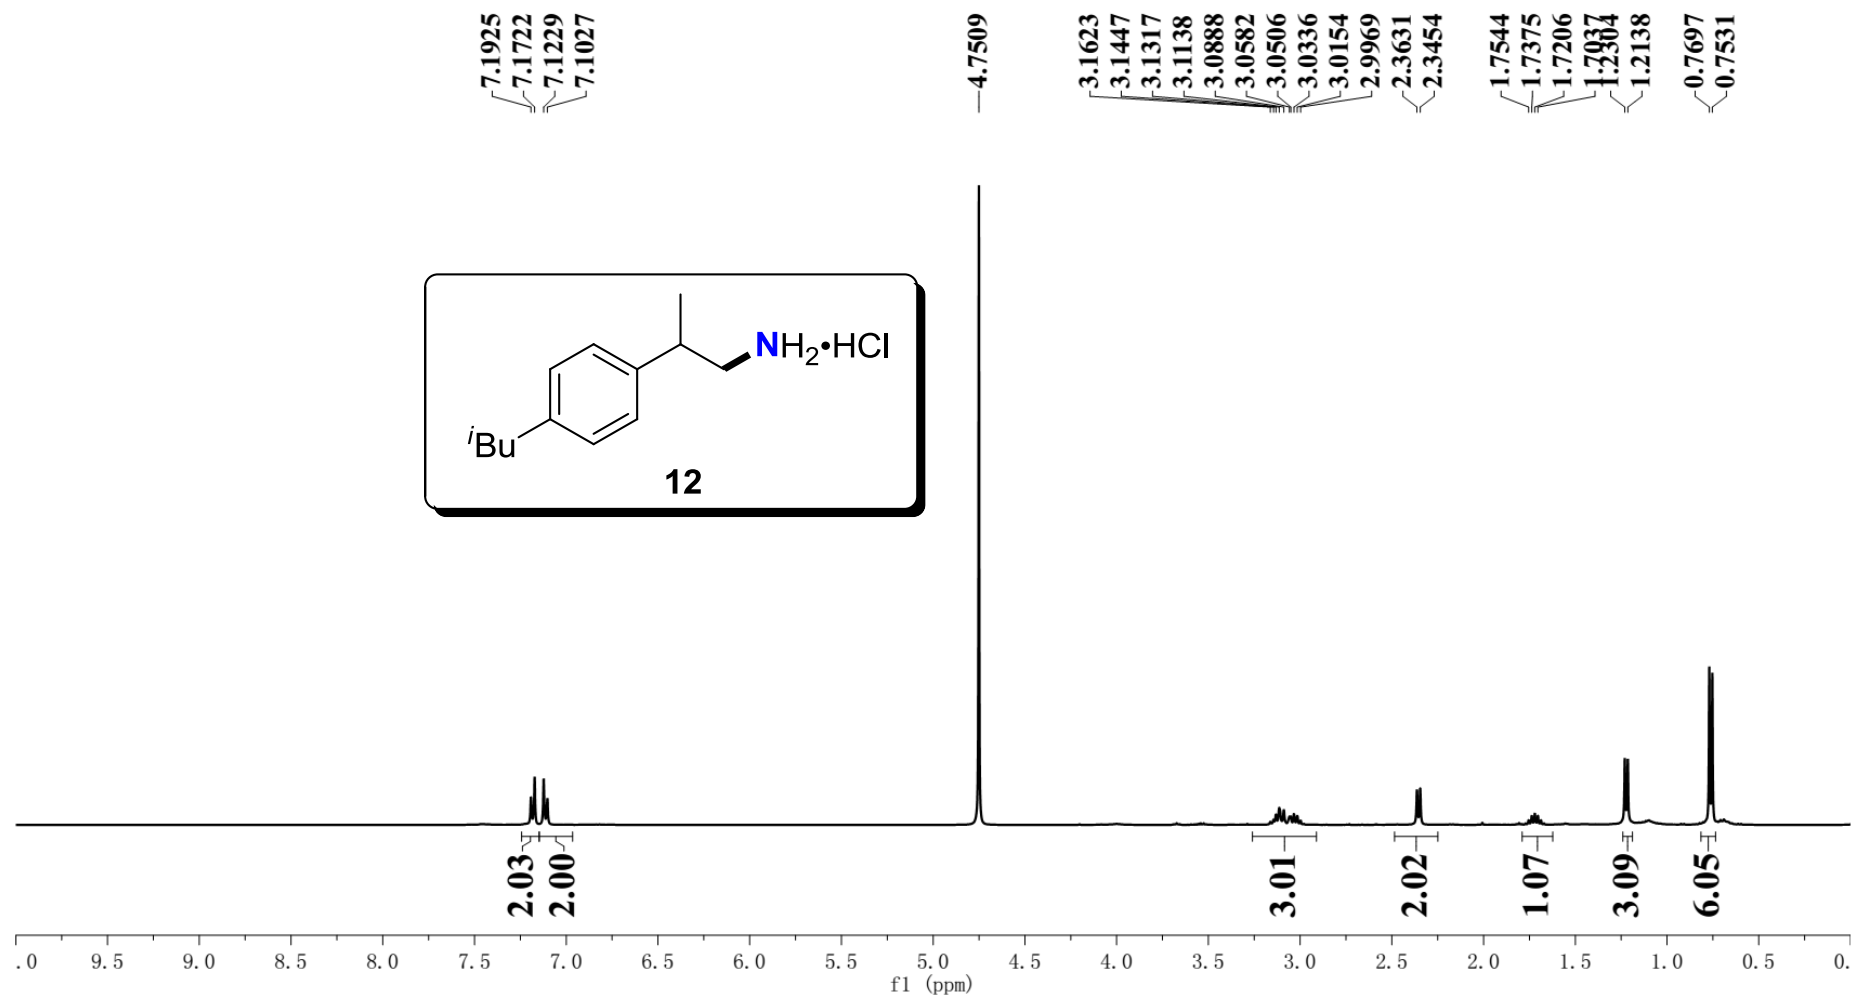

ZGY-X160107-2-CNMR

141.1789  
139.3460

129.8197  
127.0981

45.6591  
44.3005

37.3312

29.7024

21.7288  
18.6484

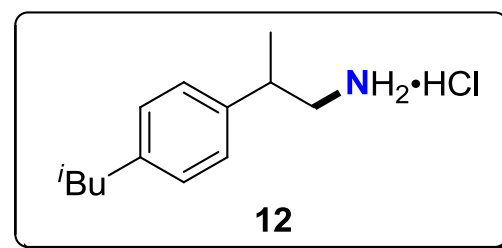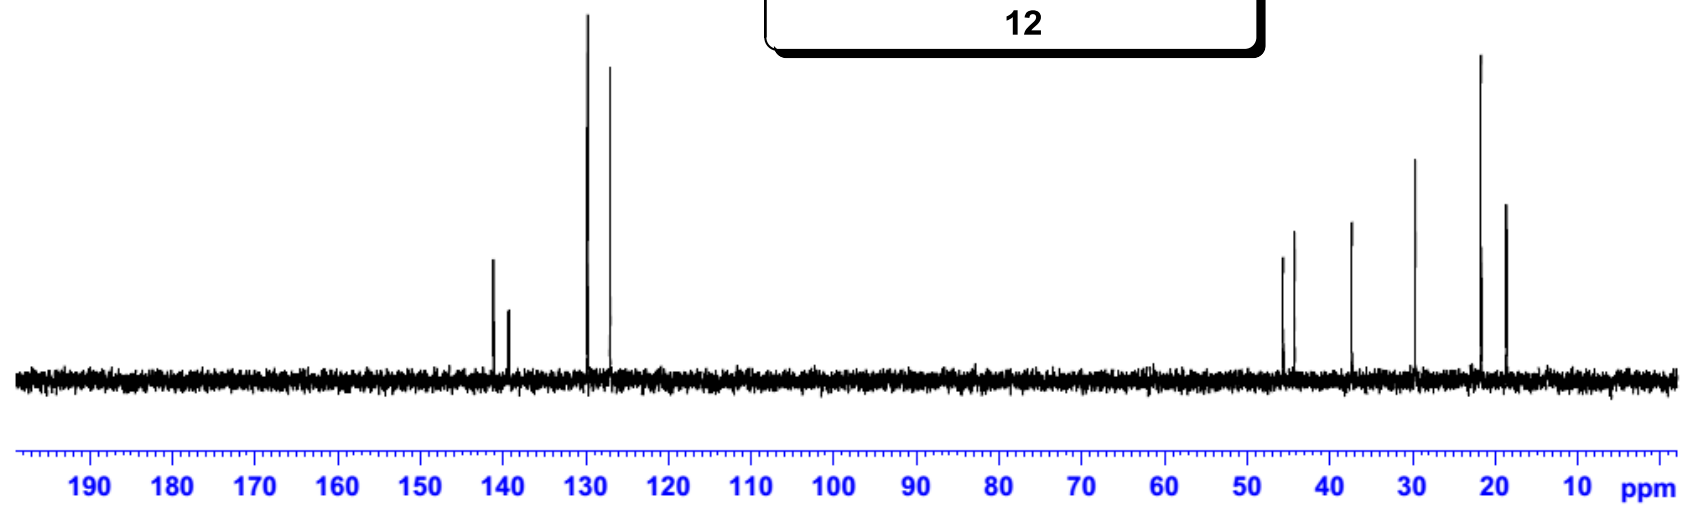

ZGY-X15Y09-2-HNMR

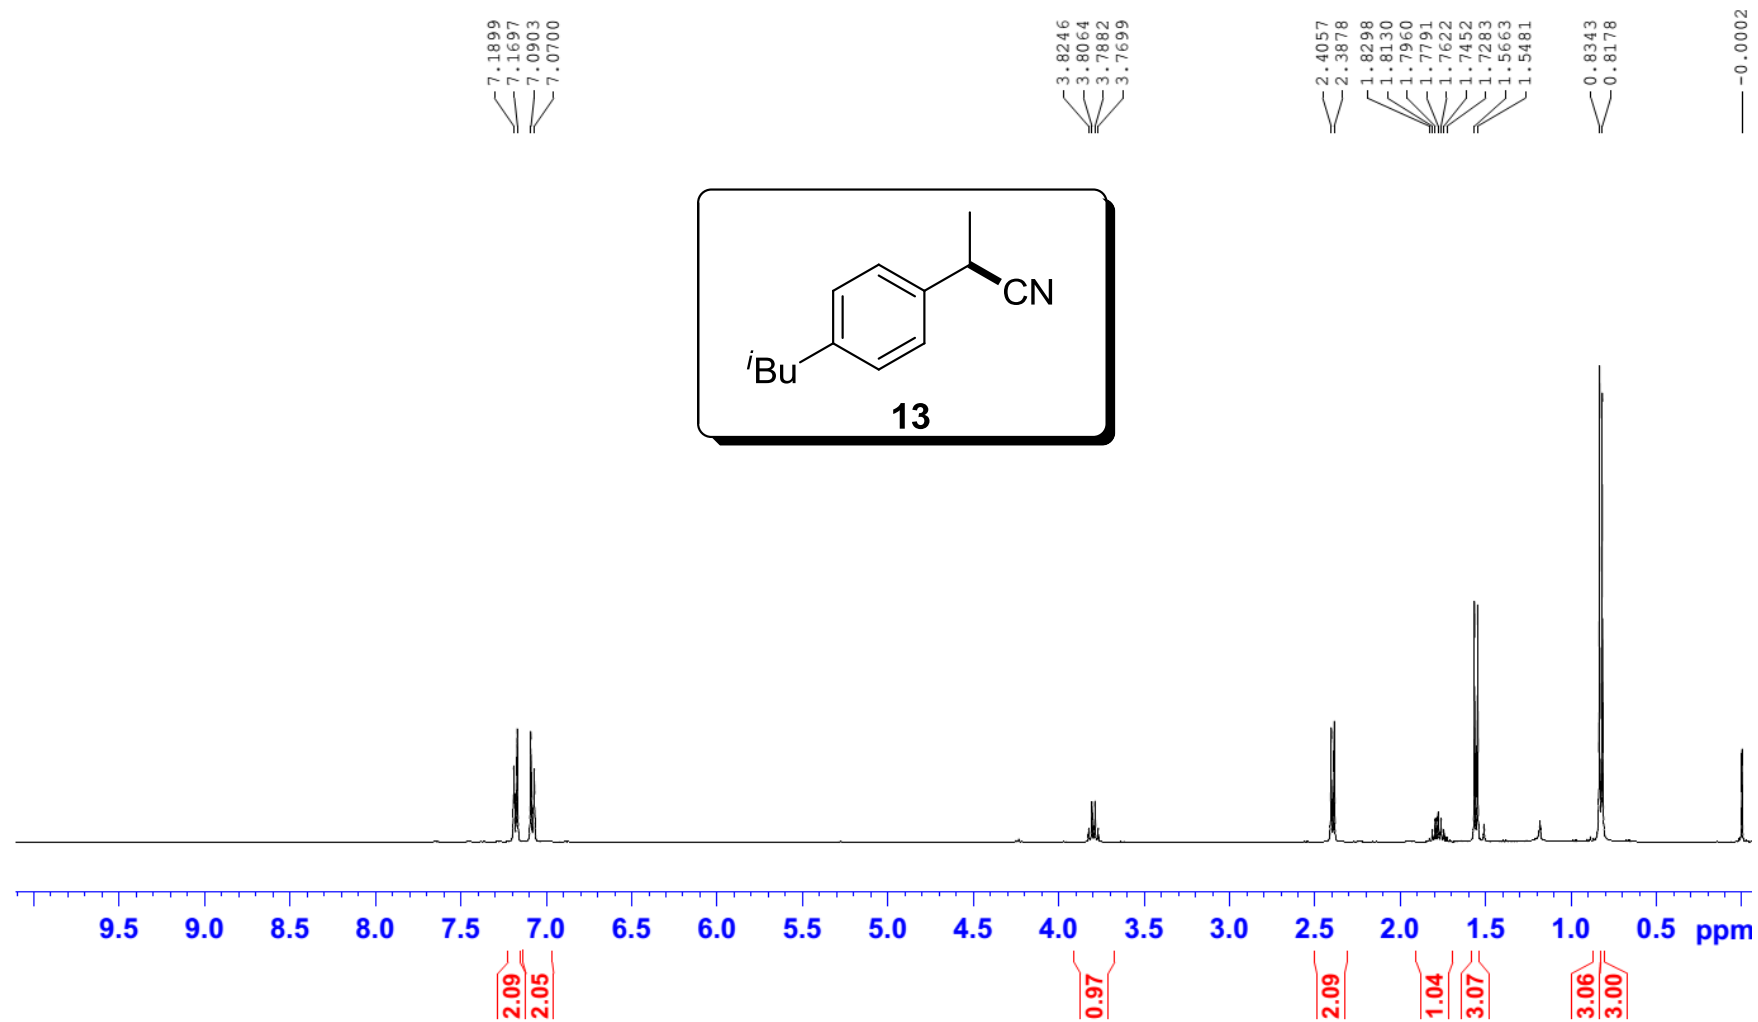

ZGY-X15Y09-2-CNMR

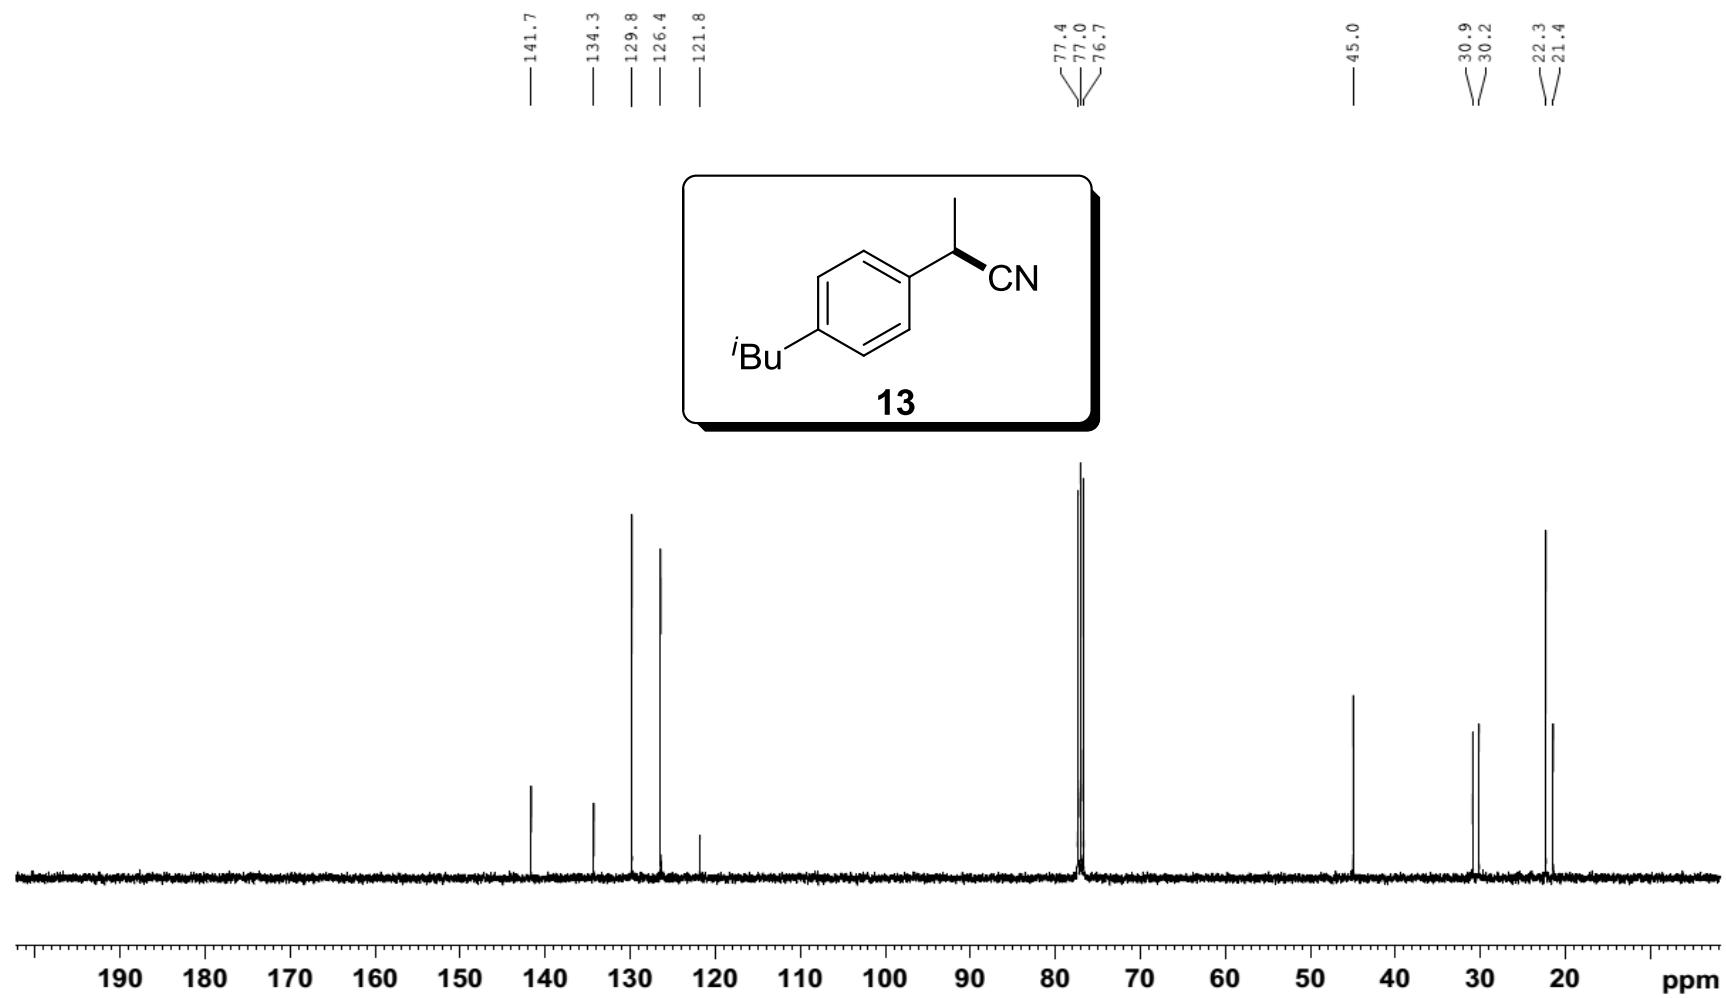

ZGY-X15X02-3-HNMR

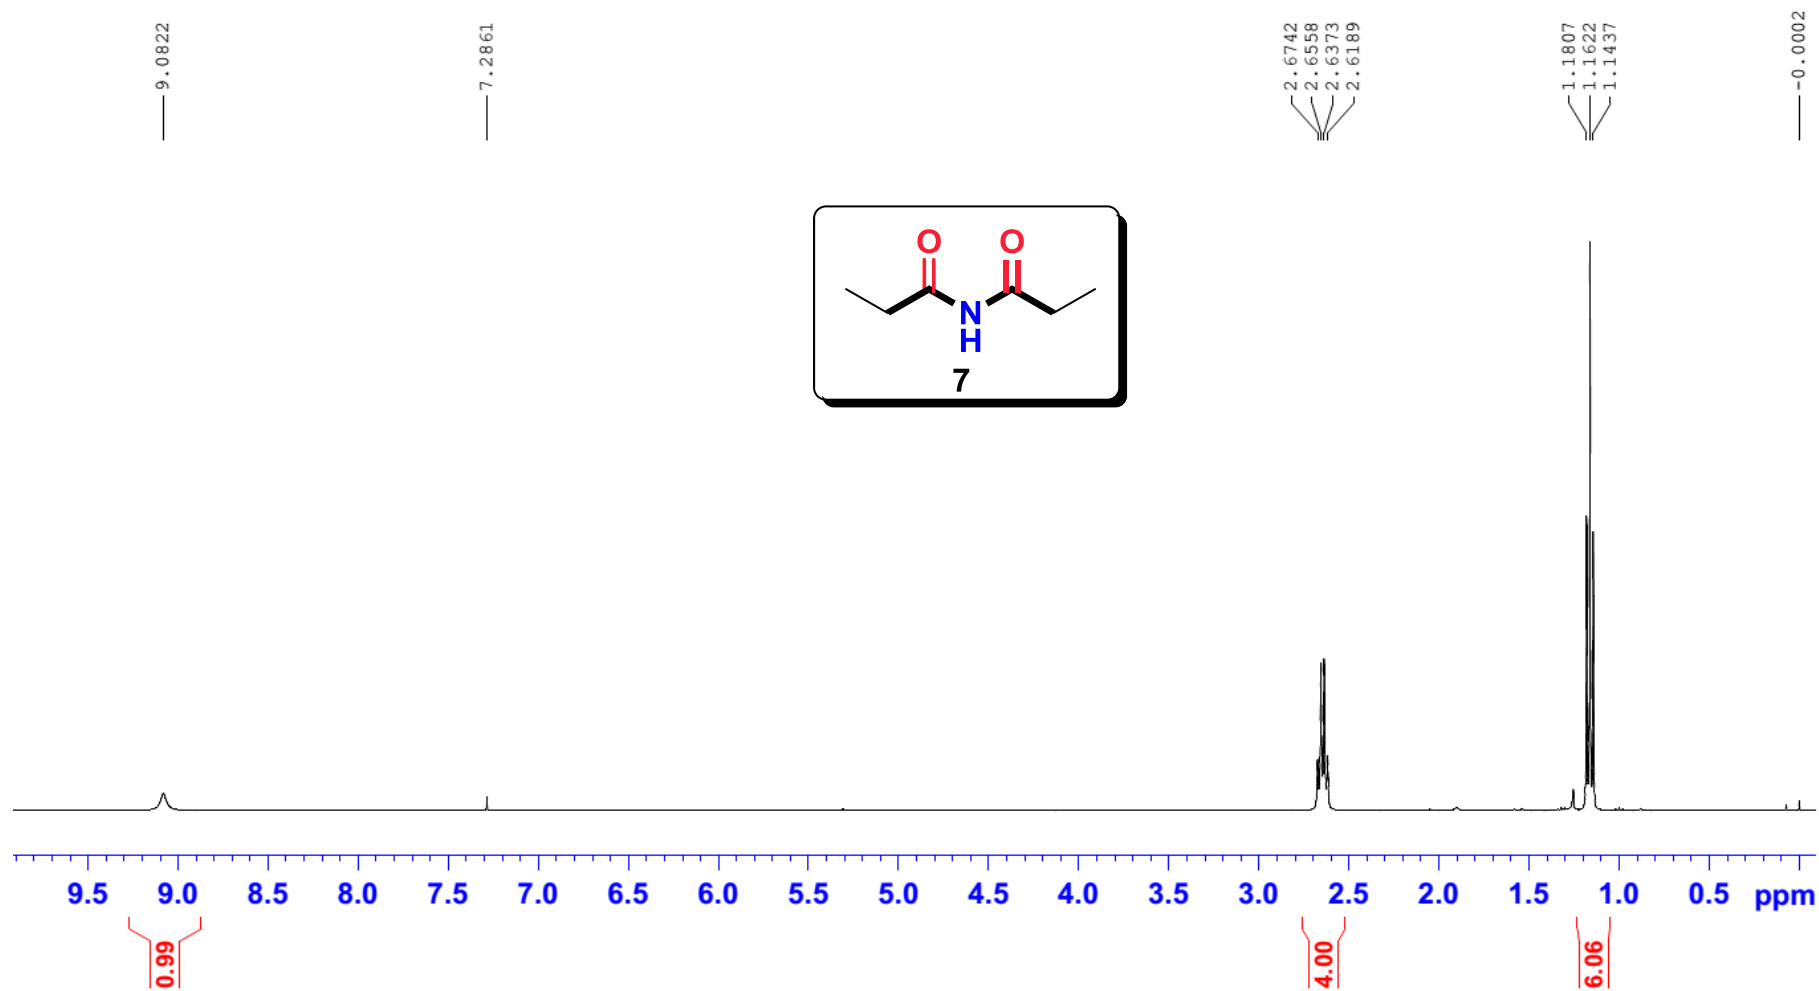

ZGY-X15X02-3-CNMR

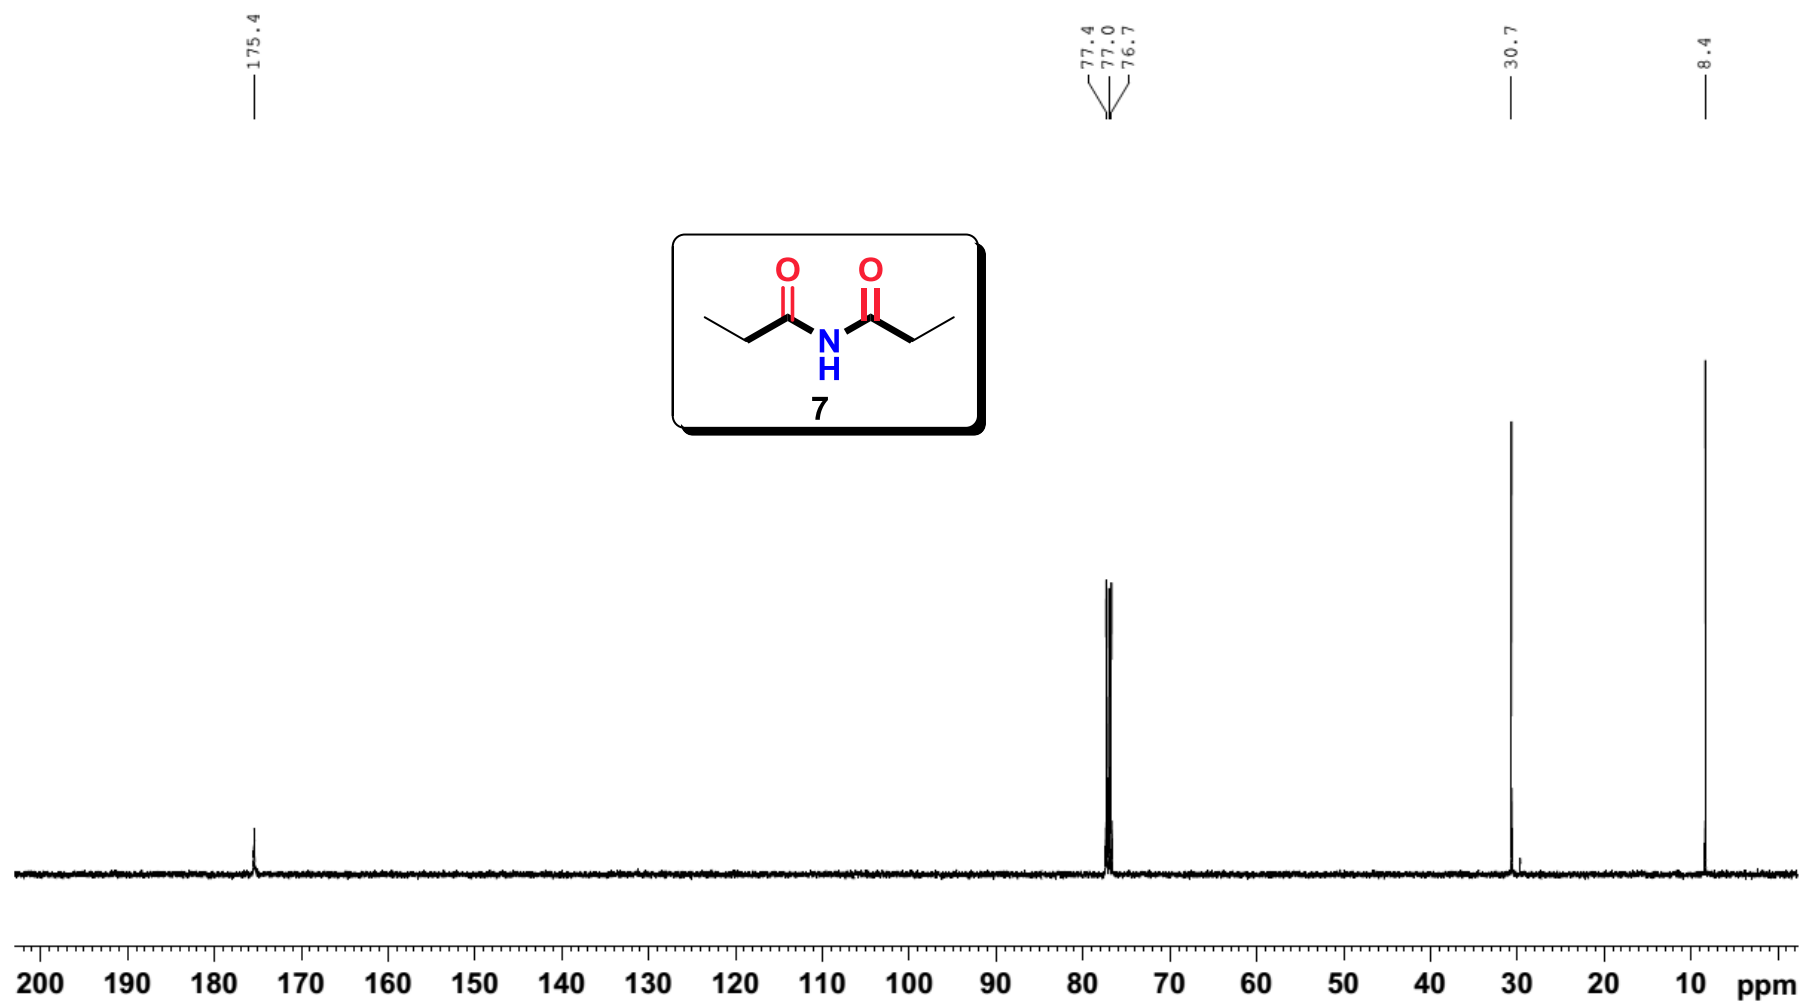

ZJP-X15Z21-2-HNMR

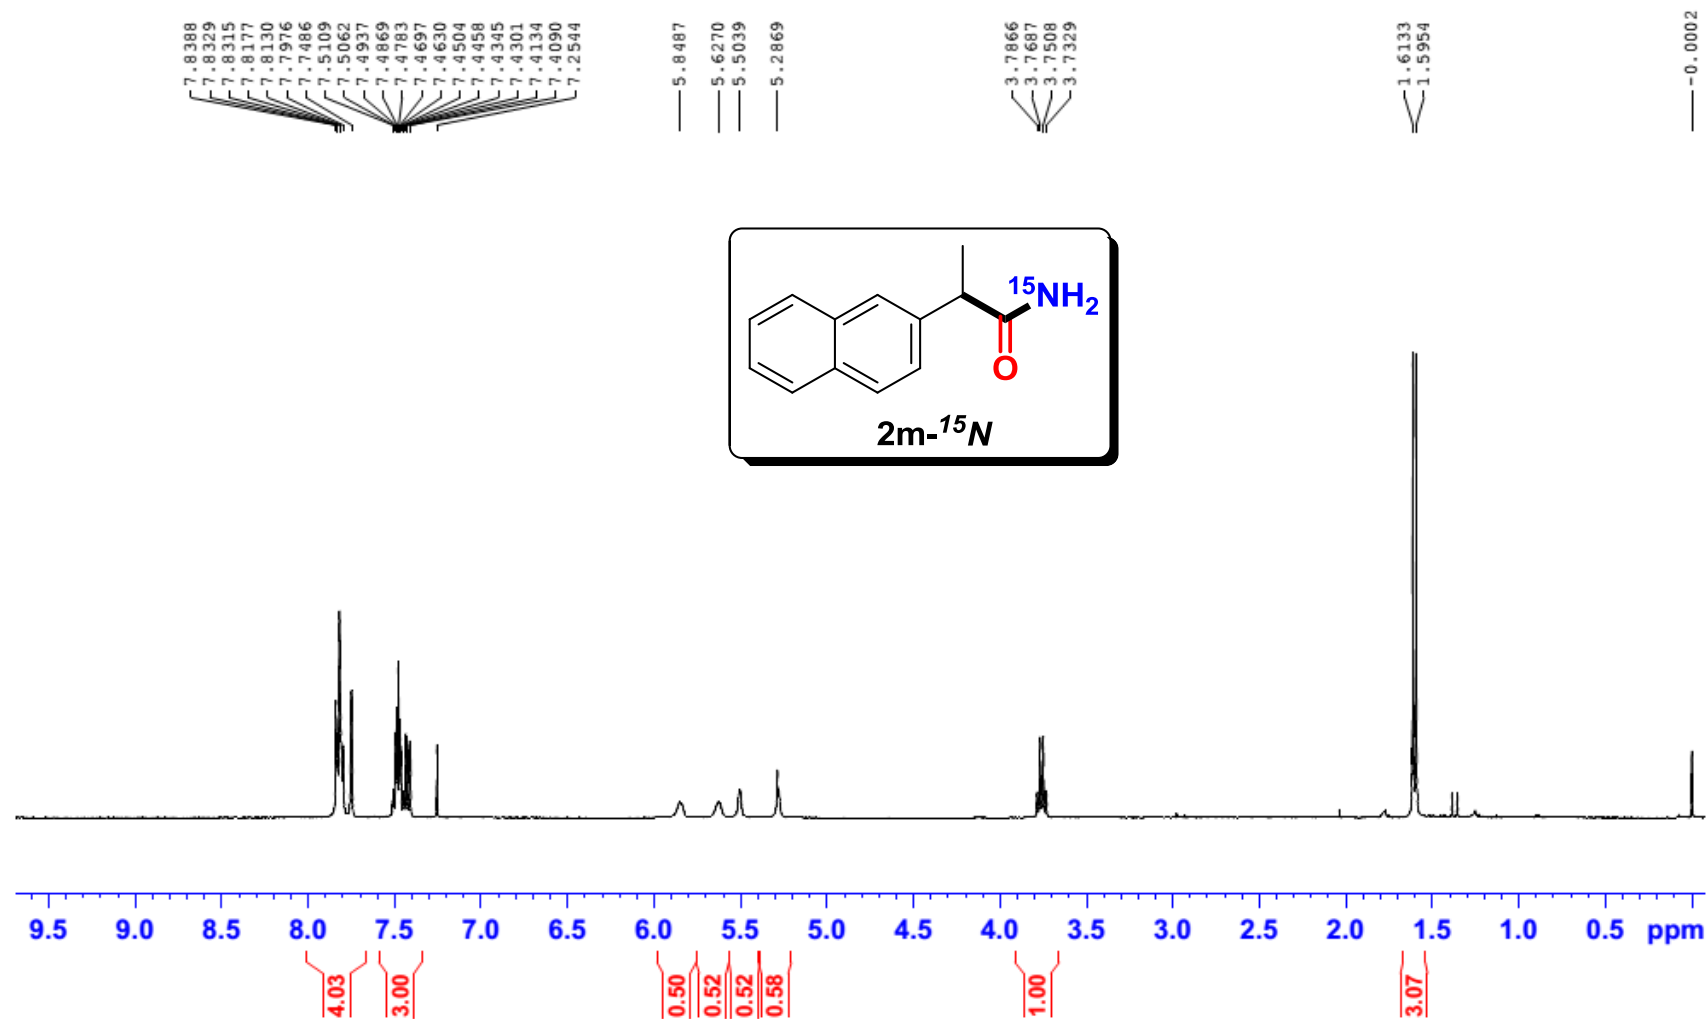



ZJP-X15Z21-2-CNMR

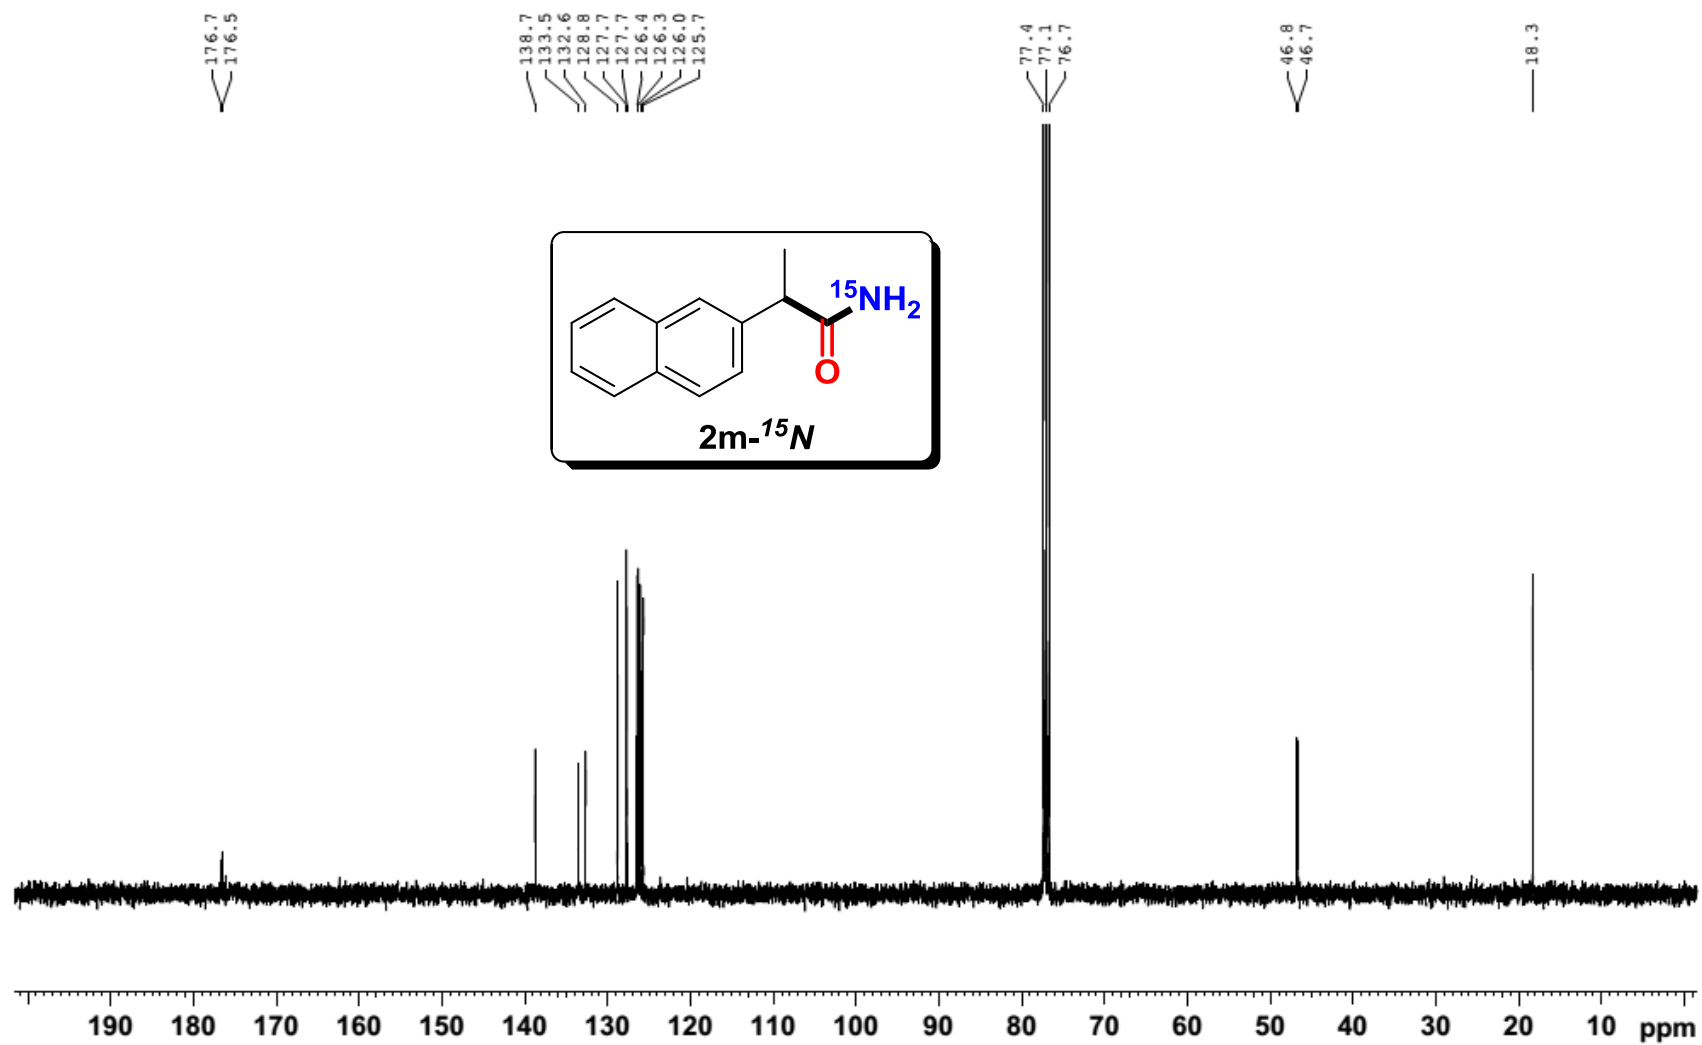

ZJP-X170413-8-HNMR

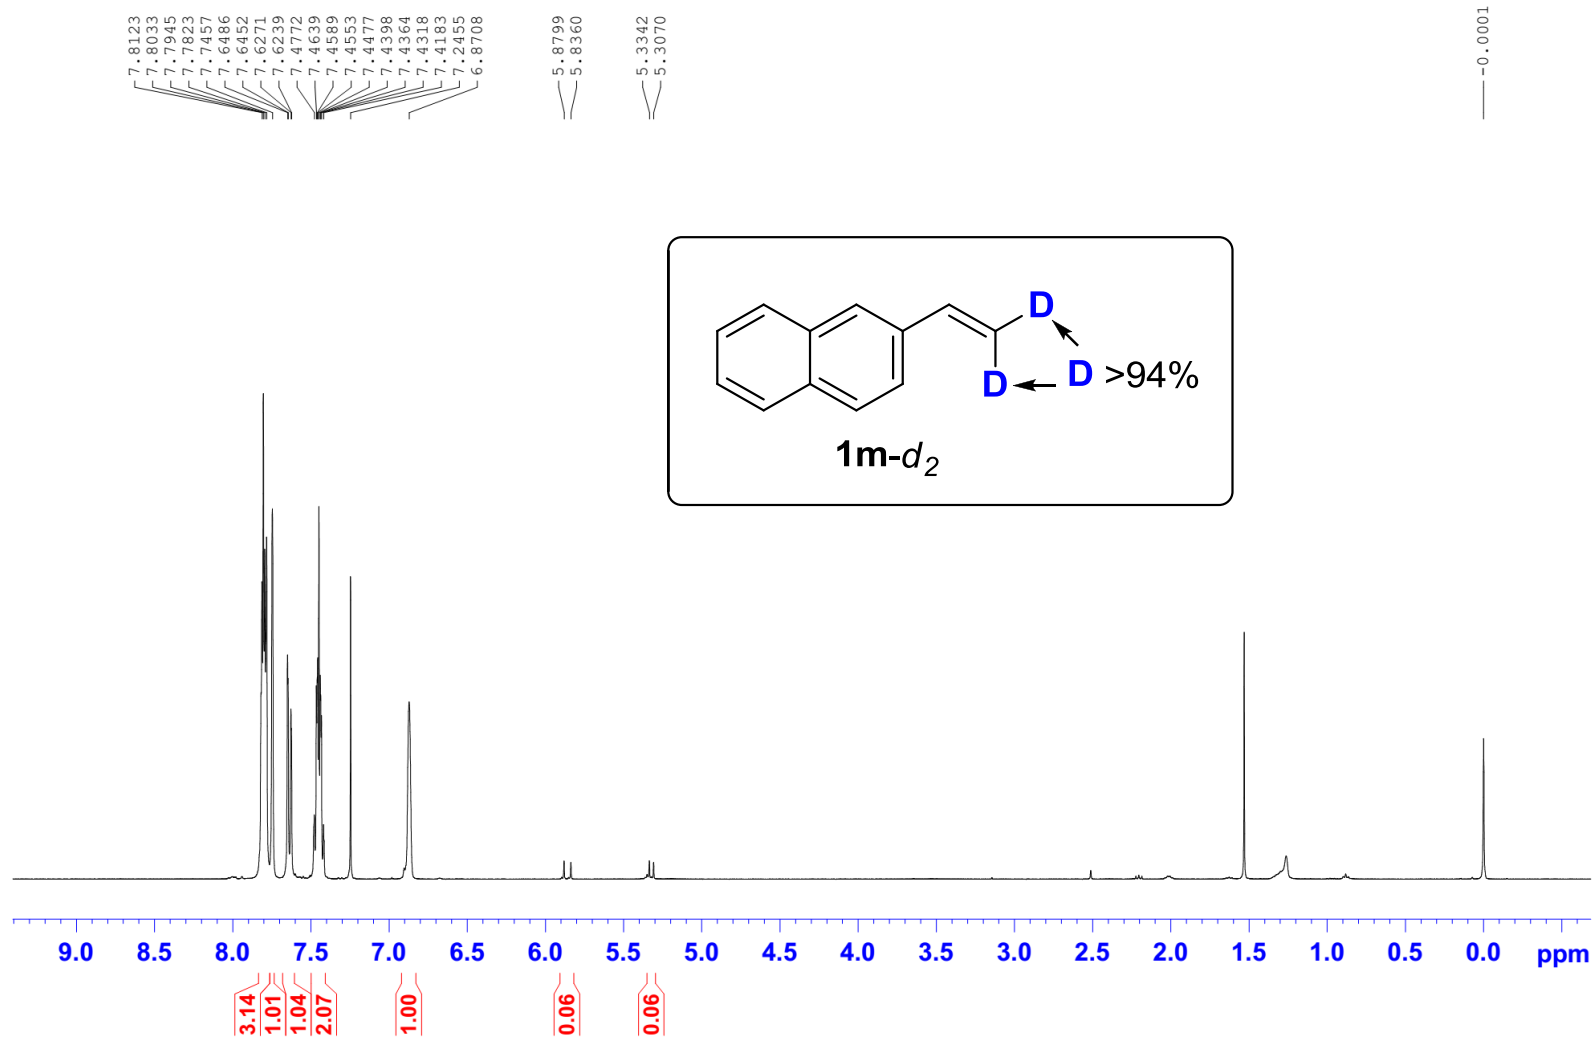

ZJP-X170418-1-CNMR

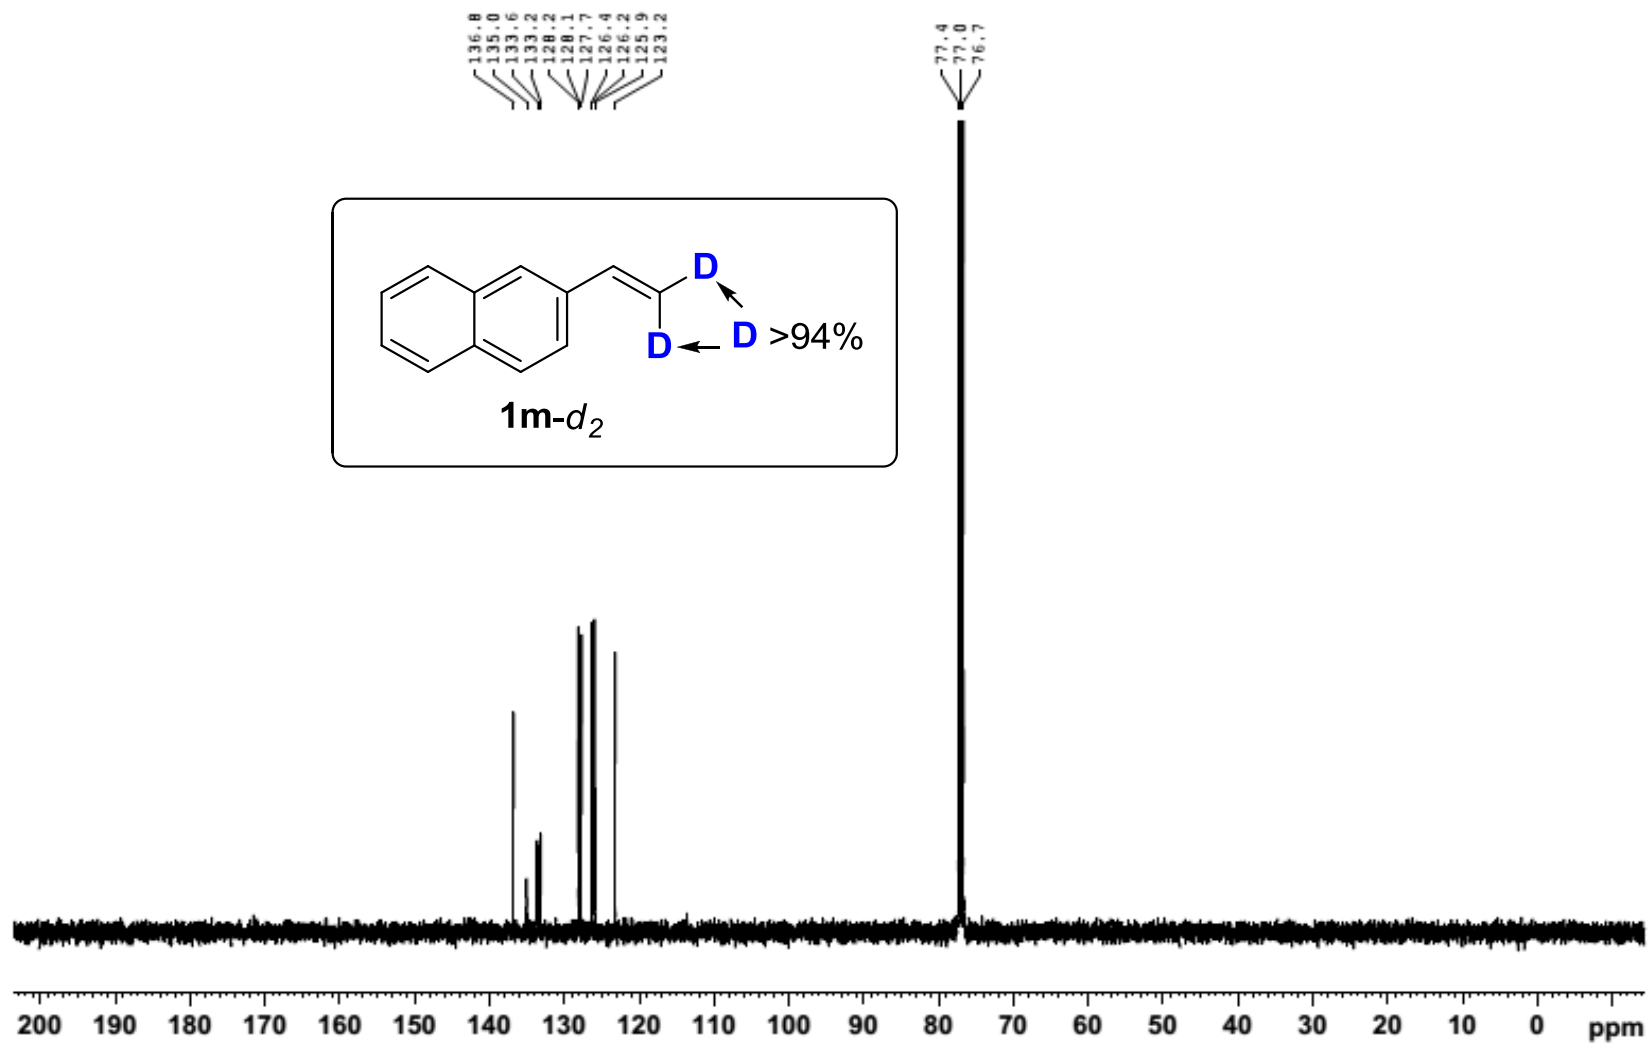

GB-X170522-1-1-HNMR in C<sub>6</sub>D<sub>6</sub>

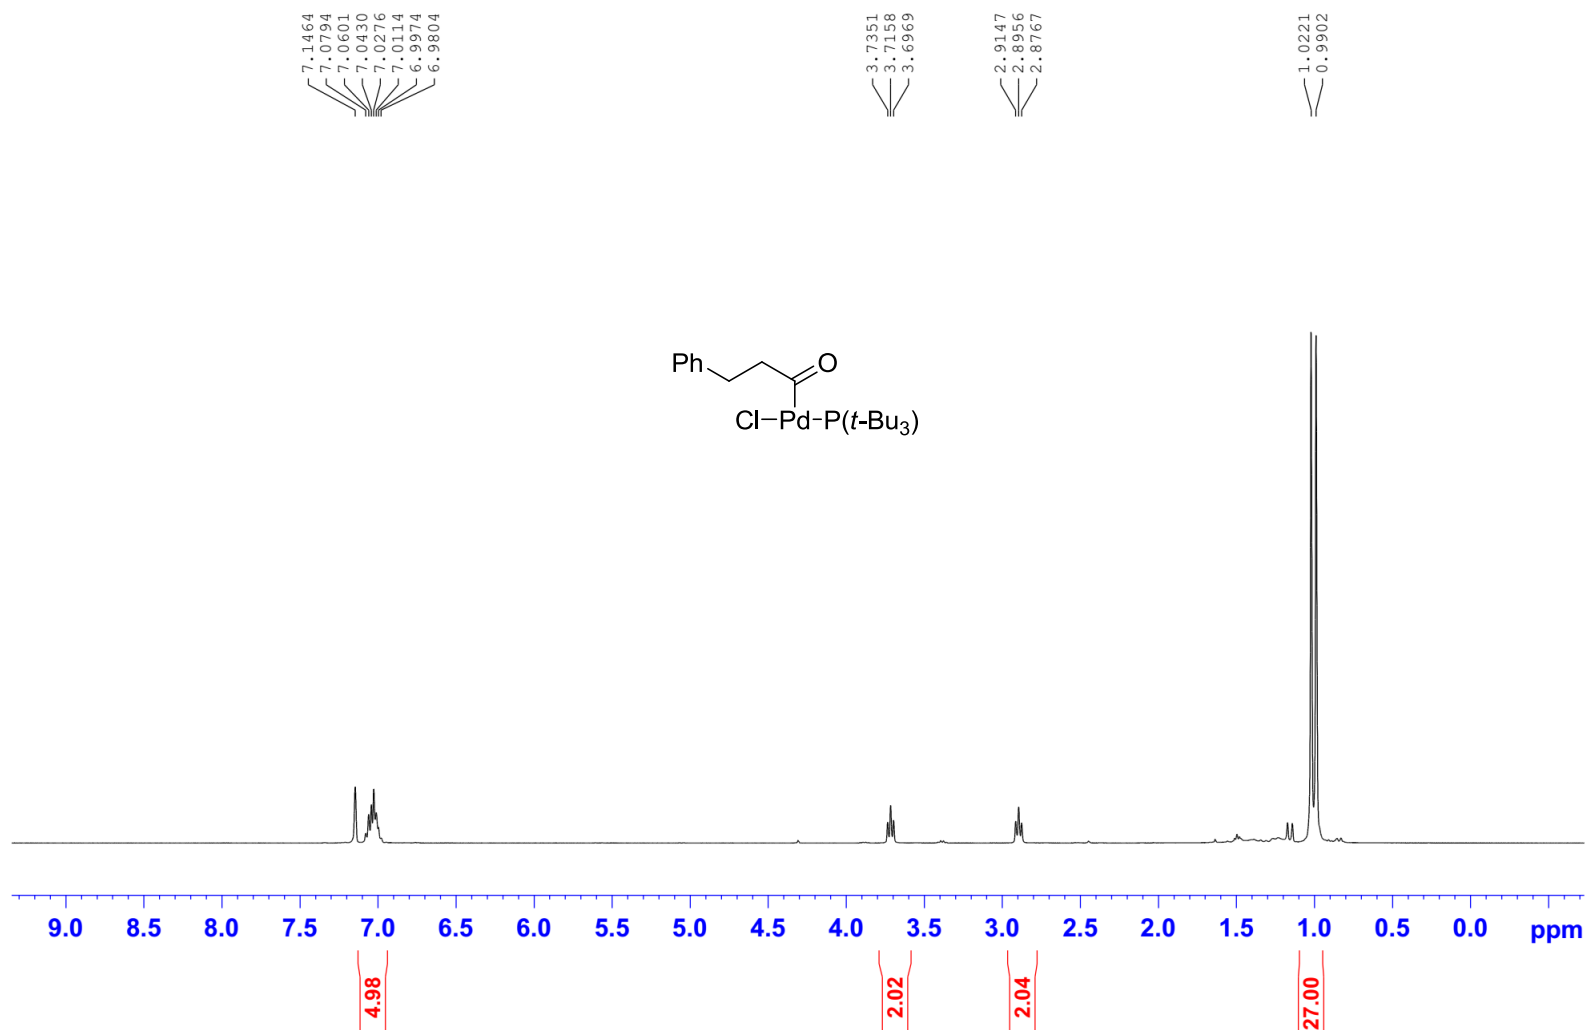

GB-X170522-1-1-PNMR in C<sub>6</sub>D<sub>6</sub>

73.9834

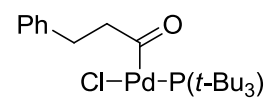

140 120 100 80 60 40 20 0 -20 -40 -60 -80 ppm

GB-X170522-1-CNMR in  $\text{CDCl}_3$

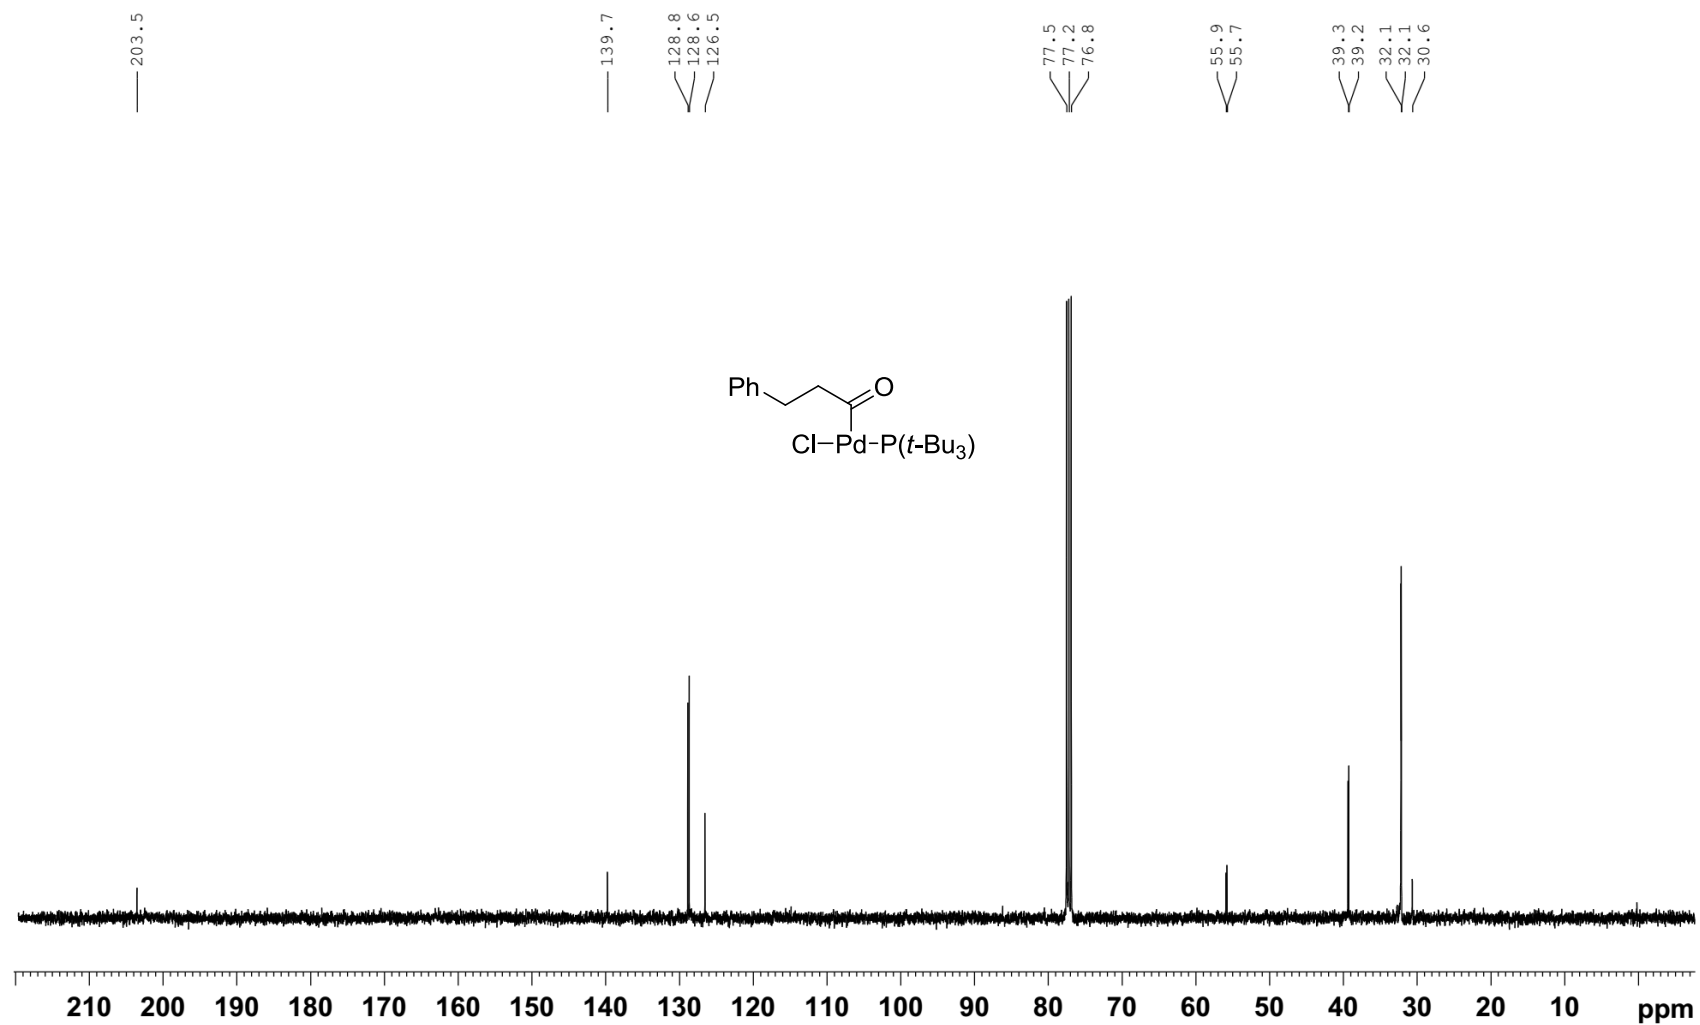

Supplement: c7sc04054g1.pdf [file c7sc04054g1.pdf]
